# Supplementary material
Source: publisher figshare collection journal article supplement (https://acs.figshare.com/ndownloader/files/8563693)
Supplement: Supplementary file 1 [file 8563693]

data_3k_TW-8-9-2

_audit_creation_method            'SHELXL-2014/7'
_shelx_SHELXL_version_number      '2014/7'
_chemical_name_systematic         ?
_chemical_name_common             ?
_chemical_melting_point           ?
_chemical_formula_moiety          ?
_chemical_formula_sum
 'C18 H17 N O'
_chemical_formula_weight          263.32

loop_
 _atom_type_symbol
 _atom_type_description
 _atom_type_scat_dispersion_real
 _atom_type_scat_dispersion_imag
 _atom_type_scat_source
 'C'  'C'   0.0033   0.0016
 'International Tables Vol C Tables 4.2.6.8 and 6.1.1.4'
 'H'  'H'   0.0000   0.0000
 'International Tables Vol C Tables 4.2.6.8 and 6.1.1.4'
 'N'  'N'   0.0061   0.0033
 'International Tables Vol C Tables 4.2.6.8 and 6.1.1.4'
 'O'  'O'   0.0106   0.0060
 'International Tables Vol C Tables 4.2.6.8 and 6.1.1.4'

_space_group_crystal_system       orthorhombic
_space_group_IT_number            61
_space_group_name_H-M_alt         'P b c a'
_space_group_name_Hall            '-P 2ac 2ab'

_shelx_space_group_comment
;
The symmetry employed for this shelxl refinement is uniquely defined
by the following loop, which should always be used as a source of
symmetry information in preference to the above space-group names.
They are only intended as comments.
;

loop_
 _space_group_symop_operation_xyz
 'x, y, z'
 '-x+1/2, -y, z+1/2'
 'x+1/2, -y+1/2, -z'
 '-x, y+1/2, -z+1/2'
 '-x, -y, -z'
 'x-1/2, y, -z-1/2'
 '-x-1/2, y-1/2, z'
 'x, -y-1/2, z-1/2'

_cell_length_a                    12.0059(13)
_cell_length_b                    12.0835(13)
_cell_length_c                    19.337(2)
_cell_angle_alpha                 90
_cell_angle_beta                  90
_cell_angle_gamma                 90
_cell_volume                      2805.4(5)
_cell_formula_units_Z             8
_cell_measurement_temperature     100(2)

_cell_measurement_reflns_used     5821

_cell_measurement_theta_min       2.61

_cell_measurement_theta_max       28.13


_exptl_crystal_description        prism

_exptl_crystal_colour             colourless

_exptl_crystal_density_meas       ?
_exptl_crystal_density_method     ?
_exptl_crystal_density_diffrn     1.247
_exptl_crystal_F_000              1120
_exptl_transmission_factor_min    ?
_exptl_transmission_factor_max    ?
_exptl_crystal_size_max           0.266

_exptl_crystal_size_mid           0.25

_exptl_crystal_size_min           0.153

_exptl_absorpt_coefficient_mu     0.077
_shelx_estimated_absorpt_T_min    0.980
_shelx_estimated_absorpt_T_max    0.989
_exptl_absorpt_correction_type    multi-scan

_exptl_absorpt_correction_T_min   0.906

_exptl_absorpt_correction_T_max   0.989

_exptl_absorpt_process_details    'SADABS 2015/4'

_exptl_absorpt_special_details    ?
_diffrn_ambient_temperature       100(2)

_diffrn_radiation_wavelength      0.71073
_diffrn_radiation_type            MoK\a
_diffrn_source                    ?
_diffrn_measurement_device_type   'Bruker APEX-II CCD'

_diffrn_measurement_method        '\f and \w scans'

_diffrn_detector_area_resol_mean  ?

_diffrn_reflns_number             14585
_diffrn_reflns_av_unetI/netI      0.0272
_diffrn_reflns_av_R_equivalents   0.0285
_diffrn_reflns_limit_h_min        -15
_diffrn_reflns_limit_h_max        13
_diffrn_reflns_limit_k_min        -15
_diffrn_reflns_limit_k_max        15
_diffrn_reflns_limit_l_min        -22
_diffrn_reflns_limit_l_max        25
_diffrn_reflns_theta_min          2.106
_diffrn_reflns_theta_max          27.496
_diffrn_reflns_theta_full         25.242
_diffrn_measured_fraction_theta_max   0.992
_diffrn_measured_fraction_theta_full  1.000
_diffrn_reflns_Laue_measured_fraction_max    0.992
_diffrn_reflns_Laue_measured_fraction_full   1.000
_diffrn_reflns_point_group_measured_fraction_max   0.992
_diffrn_reflns_point_group_measured_fraction_full  1.000
_reflns_number_total              3194
_reflns_number_gt                 2759
_reflns_threshold_expression      'I > 2\s(I)'
_reflns_Friedel_coverage          0.000
_reflns_Friedel_fraction_max      .
_reflns_Friedel_fraction_full     .

_reflns_special_details
;
 Reflections were merged by SHELXL according to the crystal
 class for the calculation of statistics and refinement.

 _reflns_Friedel_fraction is defined as the number of unique
 Friedel pairs measured divided by the number that would be
 possible theoretically, ignoring centric projections and
 systematic absences.
;

_computing_data_collection        'Bruker APEX2'
_computing_cell_refinement        'Bruker SAINT'
_computing_data_reduction         'Bruker SAINT'
_computing_structure_solution     'SHELXT (Sheldrick, 2015)'

_computing_structure_refinement 'SHELXL-2014/7 (Sheldrick, 2014)'
_computing_molecular_graphics 'Yadokari-XG 2009 (Wakita Nemoto et al., 2009)'

_computing_publication_material
;Yadokari-XG 2009 (Wakita,Nemoto et al., 2009)
;

_refine_special_details           ?
_refine_ls_structure_factor_coef  Fsqd
_refine_ls_matrix_type            full
_refine_ls_weighting_scheme       calc
_refine_ls_weighting_details
'w=1/[\s^2^(Fo^2^)+(0.0560P)^2^+0.9655P] where P=(Fo^2^+2Fc^2^)/3'
_atom_sites_solution_primary      ?
_atom_sites_solution_secondary    ?
_atom_sites_solution_hydrogens    geom
_refine_ls_hydrogen_treatment     constr

_refine_ls_extinction_method      none
_refine_ls_extinction_coef        .
_refine_ls_number_reflns          3194
_refine_ls_number_parameters      184
_refine_ls_number_restraints      0
_refine_ls_R_factor_all           0.0453
_refine_ls_R_factor_gt            0.0386
_refine_ls_wR_factor_ref          0.1060
_refine_ls_wR_factor_gt           0.0999
_refine_ls_goodness_of_fit_ref    1.031
_refine_ls_restrained_S_all       1.031
_refine_ls_shift/su_max           0.001
_refine_ls_shift/su_mean          0.000

loop_
 _atom_site_label
 _atom_site_type_symbol
 _atom_site_fract_x
 _atom_site_fract_y
 _atom_site_fract_z
 _atom_site_U_iso_or_equiv
 _atom_site_adp_type
 _atom_site_occupancy
 _atom_site_site_symmetry_order
 _atom_site_calc_flag
 _atom_site_refinement_flags_posn
 _atom_site_refinement_flags_adp
 _atom_site_refinement_flags_occupancy
 _atom_site_disorder_assembly
 _atom_site_disorder_group
N1 N 0.72587(7) 0.41551(7) 0.63846(5) 0.0159(2) Uani 1 1 d . . . . .
C1 C 0.62396(9) 0.45982(9) 0.66094(5) 0.0159(2) Uani 1 1 d . . . . .
H1 H 0.6165 0.5242 0.6887 0.019 Uiso 1 1 calc R U . . .
C2 C 0.53784(9) 0.39795(9) 0.63748(5) 0.0148(2) Uani 1 1 d . . . . .
C3 C 0.53835(9) 0.22161(9) 0.55979(5) 0.0187(2) Uani 1 1 d . . . . .
H3 H 0.4599 0.2116 0.5589 0.022 Uiso 1 1 calc R U . . .
C4 C 0.60789(10) 0.15022(10) 0.52398(6) 0.0224(2) Uani 1 1 d . . . . .
H4 H 0.5768 0.0908 0.4983 0.027 Uiso 1 1 calc R U . . .
C5 C 0.72366(10) 0.16479(10) 0.52531(6) 0.0229(3) Uani 1 1 d . . . . .
H5 H 0.7696 0.1148 0.5003 0.028 Uiso 1 1 calc R U . . .
C6 C 0.77303(9) 0.25012(10) 0.56213(6) 0.0198(2) Uani 1 1 d . . . . .
H6 H 0.8516 0.2596 0.5629 0.024 Uiso 1 1 calc R U . . .
C7 C 0.70237(9) 0.32158(9) 0.59806(5) 0.0155(2) Uani 1 1 d . . . . .
C8 C 0.58586(8) 0.30854(9) 0.59721(5) 0.0147(2) Uani 1 1 d . . . . .
C9 C 0.83207(9) 0.45520(10) 0.65456(6) 0.0192(2) Uani 1 1 d . . . . .
O1 O 0.91413(7) 0.40720(8) 0.63364(5) 0.0298(2) Uani 1 1 d . . . . .
C10 C 0.83722(9) 0.55785(10) 0.69790(6) 0.0210(2) Uani 1 1 d . . . . .
H10 H 0.9151 0.5751 0.7086 0.032 Uiso 1 1 calc R U . . .
H10A H 0.7960 0.5459 0.7410 0.032 Uiso 1 1 calc R U . . .
H10B H 0.8039 0.6197 0.6724 0.032 Uiso 1 1 calc R U . . .
C11 C 0.41637(9) 0.41691(9) 0.64641(5) 0.0159(2) Uani 1 1 d . . . . .
C12 C 0.35174(9) 0.33817(9) 0.68205(6) 0.0196(2) Uani 1 1 d . . . . .
C13 C 0.23604(10) 0.35122(11) 0.68386(7) 0.0260(3) Uani 1 1 d . . . . .
H13 H 0.1917 0.2978 0.7071 0.031 Uiso 1 1 calc R U . . .
C14 C 0.18502(10) 0.44056(12) 0.65235(7) 0.0287(3) Uani 1 1 d . . . . .
H14 H 0.1062 0.4474 0.6530 0.034 Uiso 1 1 calc R U . . .
C15 C 0.24950(10) 0.52000(11) 0.61993(6) 0.0254(3) Uani 1 1 d . . . . .
H15 H 0.2143 0.5825 0.5997 0.031 Uiso 1 1 calc R U . . .
C16 C 0.36551(9) 0.51020(10) 0.61628(5) 0.0194(2) Uani 1 1 d . . . . .
C17 C 0.40498(10) 0.24288(9) 0.71988(7) 0.0251(3) Uani 1 1 d . . . . .
H17 H 0.3564 0.2193 0.7578 0.038 Uiso 1 1 calc R U . . .
H17A H 0.4771 0.2663 0.7386 0.038 Uiso 1 1 calc R U . . .
H17B H 0.4161 0.1811 0.6878 0.038 Uiso 1 1 calc R U . . .
C18 C 0.43175(11) 0.59930(11) 0.58089(7) 0.0281(3) Uani 1 1 d . . . . .
H18 H 0.3817 0.6456 0.5532 0.042 Uiso 1 1 calc R U . . .
H18A H 0.4877 0.5653 0.5507 0.042 Uiso 1 1 calc R U . . .
H18B H 0.4690 0.6451 0.6157 0.042 Uiso 1 1 calc R U . . .

loop_
 _atom_site_aniso_label
 _atom_site_aniso_U_11
 _atom_site_aniso_U_22
 _atom_site_aniso_U_33
 _atom_site_aniso_U_23
 _atom_site_aniso_U_13
 _atom_site_aniso_U_12
N1 0.0112(5) 0.0175(4) 0.0190(4) -0.0009(3) 0.0010(3) -0.0004(3)
C1 0.0129(5) 0.0169(5) 0.0179(5) -0.0002(4) 0.0011(4) 0.0013(4)
C2 0.0133(5) 0.0161(5) 0.0150(5) 0.0010(4) 0.0008(4) 0.0007(4)
C3 0.0181(5) 0.0201(5) 0.0179(5) 0.0001(4) -0.0006(4) -0.0024(4)
C4 0.0287(6) 0.0196(5) 0.0189(5) -0.0035(4) 0.0002(4) -0.0019(5)
C5 0.0262(6) 0.0223(6) 0.0203(5) -0.0029(4) 0.0047(4) 0.0056(5)
C6 0.0165(5) 0.0234(6) 0.0196(5) 0.0014(4) 0.0037(4) 0.0036(4)
C7 0.0153(5) 0.0162(5) 0.0151(5) 0.0017(4) 0.0007(4) 0.0000(4)
C8 0.0141(5) 0.0159(5) 0.0141(5) 0.0017(4) 0.0005(4) 0.0010(4)
C9 0.0124(5) 0.0230(6) 0.0221(5) 0.0032(4) -0.0009(4) -0.0023(4)
O1 0.0125(4) 0.0340(5) 0.0429(5) -0.0059(4) 0.0013(4) 0.0005(3)
C10 0.0173(5) 0.0229(6) 0.0229(6) 0.0016(4) -0.0019(4) -0.0056(4)
C11 0.0121(5) 0.0192(5) 0.0163(5) -0.0048(4) -0.0008(4) 0.0005(4)
C12 0.0158(5) 0.0191(5) 0.0239(6) -0.0066(4) 0.0032(4) -0.0025(4)
C13 0.0156(6) 0.0286(6) 0.0337(6) -0.0127(5) 0.0059(5) -0.0067(5)
C14 0.0110(5) 0.0430(8) 0.0320(7) -0.0185(6) -0.0025(4) 0.0026(5)
C15 0.0190(5) 0.0362(7) 0.0211(5) -0.0085(5) -0.0055(4) 0.0112(5)
C16 0.0181(5) 0.0254(6) 0.0146(5) -0.0042(4) -0.0018(4) 0.0050(4)
C17 0.0238(6) 0.0187(5) 0.0327(6) 0.0012(5) 0.0086(5) -0.0030(5)
C18 0.0285(6) 0.0299(6) 0.0260(6) 0.0094(5) 0.0036(5) 0.0101(5)

_geom_special_details
;
 All esds (except the esd in the dihedral angle between two l.s. planes)
 are estimated using the full covariance matrix.  The cell esds are taken
 into account individually in the estimation of esds in distances, angles
 and torsion angles; correlations between esds in cell parameters are only
 used when they are defined by crystal symmetry.  An approximate (isotropic)
 treatment of cell esds is used for estimating esds involving l.s. planes.
;

loop_
 _geom_bond_atom_site_label_1
 _geom_bond_atom_site_label_2
 _geom_bond_distance
 _geom_bond_site_symmetry_2
 _geom_bond_publ_flag
N1 C9 1.3974(14) . ?
N1 C1 1.4045(13) . ?
N1 C7 1.4065(14) . ?
C1 C2 1.3541(15) . ?
C1 H1 0.9500 . ?
C2 C8 1.4512(14) . ?
C2 C11 1.4863(14) . ?
C3 C4 1.3858(16) . ?
C3 C8 1.3973(15) . ?
C3 H3 0.9500 . ?
C4 C5 1.4013(17) . ?
C4 H4 0.9500 . ?
C5 C6 1.3860(17) . ?
C5 H5 0.9500 . ?
C6 C7 1.3958(15) . ?
C6 H6 0.9500 . ?
C7 C8 1.4077(14) . ?
C9 O1 1.2127(14) . ?
C9 C10 1.4982(16) . ?
C10 H10 0.9800 . ?
C10 H10A 0.9800 . ?
C10 H10B 0.9800 . ?
C11 C12 1.4079(15) . ?
C11 C16 1.4083(15) . ?
C12 C13 1.3985(16) . ?
C12 C17 1.5065(17) . ?
C13 C14 1.3828(19) . ?
C13 H13 0.9500 . ?
C14 C15 1.383(2) . ?
C14 H14 0.9500 . ?
C15 C16 1.3996(16) . ?
C15 H15 0.9500 . ?
C16 C18 1.5033(17) . ?
C17 H17 0.9800 . ?
C17 H17A 0.9800 . ?
C17 H17B 0.9800 . ?
C18 H18 0.9800 . ?
C18 H18A 0.9800 . ?
C18 H18B 0.9800 . ?

loop_
 _geom_angle_atom_site_label_1
 _geom_angle_atom_site_label_2
 _geom_angle_atom_site_label_3
 _geom_angle
 _geom_angle_site_symmetry_1
 _geom_angle_site_symmetry_3
 _geom_angle_publ_flag
C9 N1 C1 126.52(9) . . ?
C9 N1 C7 125.72(9) . . ?
C1 N1 C7 107.74(9) . . ?
C2 C1 N1 110.55(9) . . ?
C2 C1 H1 124.7 . . ?
N1 C1 H1 124.7 . . ?
C1 C2 C8 106.70(9) . . ?
C1 C2 C11 128.70(10) . . ?
C8 C2 C11 124.53(9) . . ?
C4 C3 C8 118.74(10) . . ?
C4 C3 H3 120.6 . . ?
C8 C3 H3 120.6 . . ?
C3 C4 C5 120.68(10) . . ?
C3 C4 H4 119.7 . . ?
C5 C4 H4 119.7 . . ?
C6 C5 C4 121.81(10) . . ?
C6 C5 H5 119.1 . . ?
C4 C5 H5 119.1 . . ?
C5 C6 C7 117.13(10) . . ?
C5 C6 H6 121.4 . . ?
C7 C6 H6 121.4 . . ?
C6 C7 N1 130.83(10) . . ?
C6 C7 C8 121.93(10) . . ?
N1 C7 C8 107.22(9) . . ?
C3 C8 C7 119.72(10) . . ?
C3 C8 C2 132.49(10) . . ?
C7 C8 C2 107.77(9) . . ?
O1 C9 N1 120.19(11) . . ?
O1 C9 C10 123.30(10) . . ?
N1 C9 C10 116.51(10) . . ?
C9 C10 H10 109.5 . . ?
C9 C10 H10A 109.5 . . ?
H10 C10 H10A 109.5 . . ?
C9 C10 H10B 109.5 . . ?
H10 C10 H10B 109.5 . . ?
H10A C10 H10B 109.5 . . ?
C12 C11 C16 120.30(10) . . ?
C12 C11 C2 119.57(10) . . ?
C16 C11 C2 120.05(10) . . ?
C13 C12 C11 118.91(11) . . ?
C13 C12 C17 119.70(11) . . ?
C11 C12 C17 121.36(10) . . ?
C14 C13 C12 121.13(12) . . ?
C14 C13 H13 119.4 . . ?
C12 C13 H13 119.4 . . ?
C13 C14 C15 119.57(11) . . ?
C13 C14 H14 120.2 . . ?
C15 C14 H14 120.2 . . ?
C14 C15 C16 121.40(11) . . ?
C14 C15 H15 119.3 . . ?
C16 C15 H15 119.3 . . ?
C15 C16 C11 118.58(11) . . ?
C15 C16 C18 119.26(11) . . ?
C11 C16 C18 122.16(10) . . ?
C12 C17 H17 109.5 . . ?
C12 C17 H17A 109.5 . . ?
H17 C17 H17A 109.5 . . ?
C12 C17 H17B 109.5 . . ?
H17 C17 H17B 109.5 . . ?
H17A C17 H17B 109.5 . . ?
C16 C18 H18 109.5 . . ?
C16 C18 H18A 109.5 . . ?
H18 C18 H18A 109.5 . . ?
C16 C18 H18B 109.5 . . ?
H18 C18 H18B 109.5 . . ?
H18A C18 H18B 109.5 . . ?

loop_
 _geom_torsion_atom_site_label_1
 _geom_torsion_atom_site_label_2
 _geom_torsion_atom_site_label_3
 _geom_torsion_atom_site_label_4
 _geom_torsion
 _geom_torsion_site_symmetry_1
 _geom_torsion_site_symmetry_2
 _geom_torsion_site_symmetry_3
 _geom_torsion_site_symmetry_4
 _geom_torsion_publ_flag
C9 N1 C1 C2 -177.71(10) . . . . ?
C7 N1 C1 C2 0.72(12) . . . . ?
N1 C1 C2 C8 -0.25(12) . . . . ?
N1 C1 C2 C11 -177.33(10) . . . . ?
C8 C3 C4 C5 0.07(17) . . . . ?
C3 C4 C5 C6 0.08(18) . . . . ?
C4 C5 C6 C7 -0.04(17) . . . . ?
C5 C6 C7 N1 -178.72(11) . . . . ?
C5 C6 C7 C8 -0.14(16) . . . . ?
C9 N1 C7 C6 -3.71(18) . . . . ?
C1 N1 C7 C6 177.84(11) . . . . ?
C9 N1 C7 C8 177.55(10) . . . . ?
C1 N1 C7 C8 -0.89(11) . . . . ?
C4 C3 C8 C7 -0.25(15) . . . . ?
C4 C3 C8 C2 177.70(11) . . . . ?
C6 C7 C8 C3 0.30(16) . . . . ?
N1 C7 C8 C3 179.17(9) . . . . ?
C6 C7 C8 C2 -178.12(10) . . . . ?
N1 C7 C8 C2 0.75(11) . . . . ?
C1 C2 C8 C3 -178.45(11) . . . . ?
C11 C2 C8 C3 -1.22(18) . . . . ?
C1 C2 C8 C7 -0.32(12) . . . . ?
C11 C2 C8 C7 176.92(10) . . . . ?
C1 N1 C9 O1 177.57(10) . . . . ?
C7 N1 C9 O1 -0.59(17) . . . . ?
C1 N1 C9 C10 -2.53(16) . . . . ?
C7 N1 C9 C10 179.31(10) . . . . ?
C1 C2 C11 C12 -118.25(13) . . . . ?
C8 C2 C11 C12 65.14(14) . . . . ?
C1 C2 C11 C16 65.02(15) . . . . ?
C8 C2 C11 C16 -111.59(12) . . . . ?
C16 C11 C12 C13 3.30(16) . . . . ?
C2 C11 C12 C13 -173.42(10) . . . . ?
C16 C11 C12 C17 -174.74(10) . . . . ?
C2 C11 C12 C17 8.54(15) . . . . ?
C11 C12 C13 C14 -1.06(17) . . . . ?
C17 C12 C13 C14 177.01(11) . . . . ?
C12 C13 C14 C15 -1.64(18) . . . . ?
C13 C14 C15 C16 2.13(17) . . . . ?
C14 C15 C16 C11 0.10(16) . . . . ?
C14 C15 C16 C18 -179.56(11) . . . . ?
C12 C11 C16 C15 -2.83(15) . . . . ?
C2 C11 C16 C15 173.88(10) . . . . ?
C12 C11 C16 C18 176.82(10) . . . . ?
C2 C11 C16 C18 -6.48(16) . . . . ?

_refine_diff_density_max    0.248
_refine_diff_density_min   -0.270
_refine_diff_density_rms    0.054

_shelx_res_file
;

    TW892.res created by SHELXL-2014/7

TITL TW892_a.res in Pbca
REM  Yadorkari-X generated
CELL 0.71073 12.0059 12.0835 19.3375 90.0000 90.0000 90.0000
ZERR 8.0 0.0013 0.0013 0.0021 0.0000 0.0000 0.0000
LATT 1
SYMM 1/2-X, -Y, 1/2+Z
SYMM 1/2+X, 1/2-Y, -Z
SYMM -X, 1/2+Y, 1/2-Z
REM  SPGR Pbca orthorhombic
SFAC C H N O
UNIT 144 136 8 8
SIZE 0.15 0.25 0.27
TEMP -173.0
L.S. 10
FMAP 2
PLAN -20
ACTA
CONF
LIST 4
BOND $H
MERG 2
OMIT -10.000000 55.000000

WGHT    0.056000    0.965500
FVAR       0.11358
N1    3    0.725872    0.415513    0.638462    11.00000    0.01123    0.01755 =
         0.01903   -0.00090    0.00098   -0.00044
C1    1    0.623956    0.459815    0.660939    11.00000    0.01286    0.01692 =
         0.01793   -0.00024    0.00109    0.00133
AFIX  43
H1    2    0.616480    0.524217    0.688732    11.00000   -1.20000
AFIX   0
C2    1    0.537841    0.397954    0.637479    11.00000    0.01329    0.01607 =
         0.01501    0.00105    0.00079    0.00066
C3    1    0.538352    0.221611    0.559785    11.00000    0.01812    0.02007 =
         0.01793    0.00005   -0.00055   -0.00240
AFIX  43
H3    2    0.459877    0.211634    0.558902    11.00000   -1.20000
AFIX   0
C4    1    0.607894    0.150225    0.523981    11.00000    0.02866    0.01964 =
         0.01891   -0.00354    0.00024   -0.00192
AFIX  43
H4    2    0.576759    0.090803    0.498269    11.00000   -1.20000
AFIX   0
C5    1    0.723664    0.164792    0.525314    11.00000    0.02621    0.02233 =
         0.02030   -0.00295    0.00473    0.00564
AFIX  43
H5    2    0.769573    0.114813    0.500300    11.00000   -1.20000
AFIX   0
C6    1    0.773034    0.250118    0.562126    11.00000    0.01651    0.02344 =
         0.01957    0.00138    0.00370    0.00359
AFIX  43
H6    2    0.851580    0.259557    0.562867    11.00000   -1.20000
AFIX   0
C7    1    0.702369    0.321579    0.598061    11.00000    0.01533    0.01620 =
         0.01508    0.00169    0.00070   -0.00003
C8    1    0.585860    0.308544    0.597211    11.00000    0.01409    0.01590 =
         0.01411    0.00167    0.00054    0.00099
C9    1    0.832074    0.455205    0.654558    11.00000    0.01242    0.02296 =
         0.02213    0.00323   -0.00087   -0.00232
O1    4    0.914130    0.407203    0.633644    11.00000    0.01246    0.03403 =
         0.04286   -0.00587    0.00131    0.00047
C10   1    0.837215    0.557850    0.697897    11.00000    0.01729    0.02292 =
         0.02286    0.00158   -0.00192   -0.00559
AFIX 137
H10   2    0.915094    0.575083    0.708597    11.00000   -1.50000
H10A  2    0.796003    0.545931    0.741003    11.00000   -1.50000
H10B  2    0.803913    0.619679    0.672439    11.00000   -1.50000
AFIX   0
C11   1    0.416368    0.416905    0.646410    11.00000    0.01208    0.01918 =
         0.01630   -0.00480   -0.00075    0.00046
C12   1    0.351741    0.338167    0.682052    11.00000    0.01580    0.01909 =
         0.02388   -0.00663    0.00323   -0.00248
C13   1    0.236038    0.351215    0.683861    11.00000    0.01562    0.02858 =
         0.03373   -0.01268    0.00588   -0.00670
AFIX  43
H13   2    0.191730    0.297777    0.707137    11.00000   -1.20000
AFIX   0
C14   1    0.185017    0.440565    0.652353    11.00000    0.01104    0.04299 =
         0.03203   -0.01852   -0.00252    0.00262
AFIX  43
H14   2    0.106191    0.447355    0.652968    11.00000   -1.20000
AFIX   0
C15   1    0.249501    0.520005    0.619931    11.00000    0.01897    0.03623 =
         0.02115   -0.00850   -0.00547    0.01123
AFIX  43
H15   2    0.214290    0.582540    0.599716    11.00000   -1.20000
AFIX   0
C16   1    0.365509    0.510201    0.616276    11.00000    0.01815    0.02536 =
         0.01460   -0.00416   -0.00184    0.00495
C17   1    0.404985    0.242881    0.719880    11.00000    0.02376    0.01875 =
         0.03265    0.00124    0.00856   -0.00298
AFIX 137
H17   2    0.356382    0.219287    0.757833    11.00000   -1.50000
H17A  2    0.477080    0.266312    0.738600    11.00000   -1.50000
H17B  2    0.416129    0.181058    0.687817    11.00000   -1.50000
AFIX   0
C18   1    0.431752    0.599297    0.580889    11.00000    0.02850    0.02992 =
         0.02600    0.00936    0.00359    0.01015
AFIX 137
H18   2    0.381739    0.645552    0.553163    11.00000   -1.50000
H18A  2    0.487696    0.565292    0.550717    11.00000   -1.50000
H18B  2    0.469006    0.645130    0.615719    11.00000   -1.50000

AFIX   0
HKLF 4 1 1 0 0 0 1 0 0 0 1

REM  TW892_a.res in Pbca
REM R1 =  0.0386 for    2759 Fo > 4sig(Fo)  and  0.0453 for all    3194 data
REM    184 parameters refined using      0 restraints

END

WGHT      0.0560      0.9655

REM Highest difference peak  0.248,  deepest hole -0.270,  1-sigma level  0.054
Q1    1   0.3784  0.2922  0.7030  11.00000  0.05    0.25
Q2    1   0.6426  0.3030  0.5994  11.00000  0.05    0.23
Q3    1   0.5602  0.2837  0.5687  11.00000  0.05    0.23
Q4    1   0.5535  0.3455  0.6197  11.00000  0.05    0.23
Q5    1   0.5765  0.2026  0.5323  11.00000  0.05    0.22
Q6    1   0.2963  0.3589  0.7002  11.00000  0.05    0.22
Q7    1   0.3862  0.3770  0.6730  11.00000  0.05    0.21
Q8    1   0.7389  0.3029  0.5672  11.00000  0.05    0.21
Q9    1   0.6688  0.1555  0.5290  11.00000  0.05    0.20
Q10   1   0.3071  0.5032  0.6088  11.00000  0.05    0.20
Q11   1   0.7434  0.2266  0.5297  11.00000  0.05    0.19
Q12   1   0.3915  0.4620  0.6272  11.00000  0.05    0.19
Q13   1   0.3718  0.1684  0.7186  11.00000  0.05    0.19
Q14   1   0.8350  0.5032  0.6817  11.00000  0.05    0.19
Q15   1   0.4055  0.2507  0.7725  11.00000  0.05    0.19
Q16   1   0.4767  0.4062  0.6444  11.00000  0.05    0.18
Q17   1   0.3986  0.5376  0.5910  11.00000  0.05    0.18
Q18   1   0.5782  0.4486  0.6303  11.00000  0.05    0.16
Q19   1   0.7705  0.4428  0.6429  11.00000  0.05    0.15
Q20   1   0.7507  0.1849  0.5583  11.00000  0.05    0.15
;
_shelx_res_checksum   89716

_shelx_hkl_file
;
  -1   0   0   -0.33    0.01
  -2   0   0  225.89    4.66
  -2   0   0  218.10    4.59
  -3   0   0   -0.29    0.01
  -3   0   0   -0.26    0.02
  -4   0   0   33.58    0.71
  -4   0   0   33.64    0.75
  -5   0   0    0.10    0.02
  -5   0   0    0.09    0.03
  -6   0   0  206.69    4.29
  -6   0   0  205.04    4.34
  -8   0   0    0.09    0.04
  -9   0   0   -0.03    0.04
 -10   0   0    0.37    0.08
 -11   0   0   -0.02    0.06
 -12   0   0    6.77    0.30
 -13   0   0    0.04    0.07
 -14   0   0    0.42    0.12
 -15   0   0   -0.03    0.07
   0   1   0   -0.06    0.02
   0   1   0   -0.06    0.01
  -1   1   0   -0.05    0.01
  -1  -1   0   -0.07    0.01
  -1   1   0   -0.07    0.01
   1   1   0   -0.05    0.01
   1   1   0   -0.05    0.01
  -2  -1   0   37.54    0.80
  -2   1   0   37.62    0.80
  -2   1   0   37.31    0.79
   2   1   0   37.92    0.80
   3   1   0   -0.02    0.02
  -3   1   0    0.02    0.02
  -3  -1   0   -0.02    0.02
  -3   1   0   -0.03    0.01
  -4  -1   0    1.04    0.06
  -4   1   0    1.18    0.05
  -4   1   0    1.15    0.07
  -5   1   0    0.00    0.02
  -5   1   0    0.04    0.03
  -5  -1   0    0.02    0.03
  -6   1   0   98.23    2.06
  -6   1   0  100.21    2.12
  -6  -1   0   98.51    2.11
  -7   1   0    0.02    0.02
  -7   1   0   -0.01    0.03
  -7  -1   0   -0.04    0.03
  -7  -1   0   -0.01    0.02
  -8  -1   0    0.76    0.09
  -8   1   0    0.88    0.09
  -9   1   0   -0.01    0.04
  -9  -1   0    0.04    0.04
 -10   1   0   10.55    0.36
 -11  -1   0    0.06    0.06
 -11   1   0   -0.06    0.06
 -12   1   0    0.19    0.08
 -12  -1   0    0.24    0.08
 -13  -1   0    0.00    0.06
 -13   1   0    0.04    0.08
 -14  -1   0    3.97    0.25
 -14   1   0    3.57    0.24
 -15   1   0    0.03    0.09
 -15  -1   0    0.02    0.09
   0   2   0   43.37    0.90
   0   2   0   42.10    0.89
   0   2   0   42.32    0.93
   1   2   0   -0.01    0.01
  -1  -2   0   -0.03    0.01
   1   2   0   -0.02    0.02
  -1   2   0   -0.01    0.02
  -1   2   0    0.01    0.03
  -2   2   0   34.39    0.74
   2   2   0   34.86    0.74
  -2   2   0   34.65    0.76
   2   2   0   34.86    0.75
  -2  -2   0   34.06    0.74
  -3   2   0   -0.02    0.03
  -3   2   0   -0.01    0.02
  -3  -2   0   -0.03    0.02
   3   2   0   -0.04    0.02
   4   2   0   56.11    1.18
  -4   2   0   54.72    1.15
  -4   2   0   54.33    1.19
  -4  -2   0   53.92    1.18
  -5  -2   0    0.02    0.03
  -5   2   0    0.02    0.03
  -5   2   0   -0.01    0.02
  -6  -2   0   16.46    0.42
  -6   2   0   16.44    0.38
  -6   2   0   16.29    0.43
  -7   2   0    0.00    0.02
  -7  -2   0    0.01    0.03
  -7   2   0    0.03    0.04
  -8   2   0    0.90    0.10
  -8  -2   0    1.05    0.10
  -8   2   0    0.87    0.06
  -9   2   0    0.09    0.05
  -9  -2   0   -0.02    0.04
 -10  -2   0    5.42    0.24
 -10   2   0    5.40    0.25
 -11  -2   0    0.00    0.06
 -11   2   0   -0.04    0.06
 -12   2   0    5.09    0.27
 -12  -2   0    4.74    0.24
 -13  -2   0    0.09    0.07
 -13   2   0   -0.07    0.06
 -14  -2   0    0.95    0.15
 -14   2   0    0.85    0.15
 -15  -2   0    0.00    0.08
 -15   2   0    0.07    0.10
   0   3   0   -0.07    0.03
   0   3   0   -0.06    0.04
   0   3   0   -0.06    0.01
   1   3   0   -0.08    0.01
  -1  -3   0   -0.10    0.01
   1   3   0   -0.08    0.03
  -1   3   0   -0.08    0.02
  -1   3   0    0.09    0.05
   2   3   0   83.01    1.74
   2   3   0   84.21    1.77
  -2   3   0   81.52    1.76
  -2   3   0   85.51    1.79
  -2  -3   0   84.15    1.74
  -3   3   0   -0.03    0.03
   3   3   0   -0.02    0.03
  -3  -3   0    0.01    0.02
   3   3   0   -0.02    0.02
  -3   3   0    0.00    0.02
  -4   3   0   51.06    1.15
  -4  -3   0   51.33    1.12
  -4   3   0   52.29    1.11
   4   3   0   52.70    1.12
  -5  -3   0   -0.04    0.02
  -5   3   0    0.03    0.02
  -5   3   0   -0.04    0.04
  -6   3   0   12.58    0.31
  -6   3   0   12.68    0.37
  -6  -3   0   12.60    0.34
  -7  -3   0   -0.01    0.03
  -7   3   0    0.02    0.04
  -7   3   0   -0.02    0.02
  -8   3   0    0.51    0.08
  -8  -3   0    0.47    0.07
  -8   3   0    0.49    0.05
  -9   3   0    0.02    0.05
  -9  -3   0    0.00    0.04
 -10  -3   0   31.41    0.80
 -10   3   0   31.09    0.83
 -11  -3   0    0.04    0.05
 -11   3   0   -0.08    0.07
 -12  -3   0    4.30    0.23
 -12   3   0    3.65    0.23
 -13   3   0   -0.01    0.07
 -13  -3   0   -0.10    0.06
 -14  -3   0    0.70    0.13
 -14   3   0    0.58    0.13
 -15   3   0    0.09    0.12
   0   4   0   14.27    0.36
   0   4   0   14.19    0.31
   0   4   0   15.02    0.40
  -1   4   0   -0.02    0.04
  -1  -4   0    0.01    0.02
   1   4   0    0.00    0.01
  -1   4   0    0.02    0.03
   1   4   0    0.00    0.03
  -2  -4   0    7.84    0.20
   2   4   0    7.89    0.20
  -2   4   0    7.83    0.25
   2   4   0    7.85    0.23
  -2   4   0    7.38    0.22
   3   4   0   -0.03    0.02
  -3   4   0   -0.03    0.03
  -3  -4   0   -0.01    0.02
   3   4   0   -0.04    0.03
  -3   4   0   -0.05    0.03
  -4   4   0    5.41    0.20
   4   4   0    5.30    0.18
  -4   4   0    5.15    0.17
   4   4   0    5.62    0.17
  -4  -4   0    5.36    0.17
  -5   4   0   -0.01    0.04
  -5  -4   0    0.01    0.03
  -5   4   0    0.02    0.03
   5   4   0    0.02    0.03
  -6   4   0   21.96    0.52
  -6   4   0   21.70    0.58
  -6  -4   0   21.96    0.54
  -7  -4   0   -0.02    0.03
  -7   4   0    0.01    0.03
  -7   4   0    0.01    0.05
  -8   4   0   12.71    0.33
  -8   4   0   12.66    0.41
  -8  -4   0   12.30    0.37
  -9   4   0   -0.01    0.06
  -9  -4   0    0.01    0.04
 -10  -4   0    2.08    0.15
 -10   4   0    2.72    0.19
 -11   4   0   -0.04    0.07
 -11  -4   0    0.08    0.06
 -12   4   0    0.44    0.12
 -12  -4   0    0.78    0.12
 -13   4   0   -0.01    0.08
 -13  -4   0   -0.08    0.06
 -14  -4   0    2.60    0.23
 -14   4   0    2.53    0.26
   0   5   0    0.02    0.01
   0   5   0    0.00    0.03
   1   5   0   -0.07    0.01
   1   5   0   -0.07    0.03
  -1   5   0   -0.05    0.05
  -1  -5   0   -0.06    0.02
  -1   5   0   -0.08    0.03
  -2  -5   0    4.42    0.14
  -2   5   0    4.58    0.16
  -2   5   0    4.51    0.20
   2   5   0    4.42    0.13
   2   5   0    4.53    0.17
   3   5   0   -0.02    0.02
  -3   5   0   -0.02    0.03
  -3   5   0    0.00    0.05
  -3  -5   0   -0.02    0.02
   3   5   0   -0.01    0.03
   4   5   0    8.34    0.23
  -4   5   0    8.12    0.24
  -4   5   0    8.12    0.29
  -4  -5   0    8.21    0.23
   4   5   0    8.13    0.26
  -5   5   0    0.07    0.05
  -5   5   0    0.00    0.03
  -5  -5   0    0.06    0.04
   5   5   0    0.02    0.03
  -6   5   0    8.98    0.27
  -6   5   0    9.14    0.32
  -6  -5   0    9.43    0.28
  -7   5   0    0.01    0.04
  -7  -5   0    0.02    0.04
  -7   5   0   -0.06    0.04
  -8   5   0   72.71    1.65
  -8   5   0   69.58    1.55
  -8  -5   0   70.87    1.58
  -9   5   0   -0.05    0.06
  -9  -5   0   -0.05    0.04
 -10   5   0    0.05    0.08
 -10  -5   0    0.17    0.06
 -11  -5   0   -0.02    0.05
 -11   5   0   -0.10    0.06
 -12   5   0    0.07    0.09
 -12  -5   0    0.05    0.06
 -13   5   0    0.04    0.09
 -13  -5   0    0.03    0.08
 -14  -5   0   12.70    0.48
 -14   5   0   13.54    0.55
   0   6   0   48.83    1.10
   0  -6   0   48.18    1.04
   0   6   0   49.24    1.02
   1   6   0    0.01    0.04
   1   6   0    0.00    0.02
  -1   6   0    0.03    0.01
  -1  -6   0    0.05    0.02
  -1   6   0   -0.02    0.04
  -1   6   0   -0.02    0.06
   2   6   0   63.03    1.32
  -2   6   0   62.01    1.38
  -2  -6   0   63.44    1.33
  -2   6   0   60.60    1.44
   2   6   0   62.03    1.39
   3   6   0    0.04    0.05
  -3  -6   0   -0.01    0.02
   3   6   0   -0.05    0.02
  -3   6   0   -0.06    0.05
  -3   6   0    0.00    0.04
  -4   6   0    1.73    0.11
  -4   6   0    1.65    0.16
  -4  -6   0    1.92    0.10
   4   6   0    1.99    0.12
   4   6   0    1.92    0.09
  -5   6   0   -0.01    0.05
   5   6   0    0.03    0.04
  -5  -6   0    0.02    0.03
   5   6   0    0.03    0.03
  -5   6   0   -0.02    0.04
  -6   6   0   17.29    0.46
  -6   6   0   17.92    0.53
  -6  -6   0   17.88    0.46
  -7   6   0   -0.01    0.04
  -7   6   0    0.07    0.07
  -7  -6   0   -0.03    0.03
  -8   6   0   32.79    0.89
  -8   6   0   33.06    0.80
  -8  -6   0   34.20    0.82
  -9   6   0   -0.12    0.06
  -9  -6   0    0.05    0.05
 -10   6   0    2.91    0.23
 -10  -6   0    3.21    0.19
 -11   6   0   -0.02    0.09
 -11  -6   0    0.04    0.06
 -12  -6   0    5.98    0.29
 -12   6   0    6.79    0.36
 -13  -6   0    0.08    0.08
 -13   6   0   -0.14    0.09
 -14   6   0    0.67    0.17
 -14  -6   0    1.13    0.17
   0   7   0    0.03    0.02
   0   7   0    0.02    0.04
   0  -7   0    0.03    0.02
   1   7   0    0.01    0.04
  -1   7   0    0.00    0.01
  -1   7   0   -0.06    0.06
  -1  -7   0   -0.03    0.02
  -1   7   0    0.00    0.04
   1   7   0   -0.02    0.02
  -2   7   0   66.14    1.51
  -2  -7   0   64.04    1.37
   2   7   0   64.37    1.36
  -2   7   0   61.55    1.43
   2   7   0   63.65    1.45
   3   7   0    0.01    0.03
  -3  -7   0    0.05    0.03
  -3   7   0    0.00    0.06
   3   7   0    0.02    0.05
  -3   7   0    0.01    0.04
   4   7   0    1.16    0.08
  -4   7   0    1.16    0.14
  -4  -7   0    1.15    0.08
   4   7   0    1.15    0.11
  -4   7   0    1.22    0.11
   5   7   0    0.00    0.03
  -5   7   0    0.02    0.04
  -5  -7   0    0.03    0.04
   5   7   0   -0.01    0.05
  -5   7   0    0.10    0.06
  -6   7   0    4.33    0.19
  -6  -7   0    4.23    0.17
  -6   7   0    4.17    0.24
  -7  -7   0    0.09    0.05
  -7   7   0    0.03    0.08
  -7   7   0    0.08    0.06
  -8   7   0   78.51    1.76
  -8   7   0   79.90    1.88
  -8  -7   0   80.16    1.77
  -9  -7   0    0.03    0.05
  -9   7   0    0.08    0.09
 -10  -7   0    0.41    0.09
 -10   7   0    0.32    0.11
 -11  -7   0   -0.04    0.05
 -11   7   0    0.22    0.11
 -12  -7   0    1.66    0.17
 -12   7   0    2.09    0.25
 -13  -7   0    0.01    0.07
 -13   7   0    0.07    0.12
 -14   7   0    0.96    0.21
   0  -8   0   14.22    0.35
   0   8   0   14.43    0.43
   1   8   0    0.01    0.02
  -1  -8   0    0.02    0.03
  -1   8   0   -0.01    0.05
   1   8   0   -0.03    0.05
  -1   8   0    0.26    0.09
  -2   8   0    5.11    0.22
  -2   8   0    5.32    0.28
  -2  -8   0    5.40    0.17
   2   8   0    5.52    0.23
   2   8   0    5.59    0.16
   3   8   0   -0.10    0.04
   3   8   0    0.02    0.03
  -3   8   0    0.01    0.07
  -3  -8   0    0.01    0.03
  -3   8   0   -0.04    0.05
   4   8   0    6.39    0.26
  -4   8   0    6.54    0.31
  -4  -8   0    6.36    0.21
   4   8   0    6.31    0.20
  -4   8   0    6.63    0.25
   5   8   0   -0.02    0.06
  -5   8   0   -0.05    0.04
  -5  -8   0   -0.01    0.03
  -5   8   0    0.08    0.08
   5   8   0   -0.03    0.04
  -6   8   0    8.88    0.38
  -6   8   0    9.30    0.32
  -6  -8   0    8.98    0.29
  -7  -8   0    0.07    0.05
  -7   8   0    0.01    0.09
  -7   8   0   -0.01    0.06
  -8   8   0   17.66    0.61
  -8  -8   0   18.09    0.50
  -8   8   0   17.83    0.51
  -9   8   0    0.04    0.09
  -9  -8   0   -0.04    0.05
 -10  -8   0    4.06    0.21
 -10   8   0    4.13    0.29
 -11  -8   0   -0.04    0.06
 -11   8   0    0.08    0.11
 -12  -8   0    4.71    0.25
 -12   8   0    4.72    0.34
 -13   8   0    0.00    0.12
 -13  -8   0    0.00    0.07
   0  -9   0    0.03    0.03
   0   9   0    0.03    0.06
   1   9   0    0.11    0.07
   1  -9   0    0.00    0.03
  -1  -9   0    0.04    0.03
  -1   9   0   -0.02    0.05
   2   9   0    0.53    0.10
  -2   9   0    0.52    0.12
  -2  -9   0    0.33    0.05
  -2   9   0    0.38    0.08
   3   9   0    0.02    0.06
  -3   9   0   -0.02    0.05
  -3  -9   0   -0.03    0.03
  -3   9   0    0.01    0.08
  -4  -9   0    7.03    0.23
  -4   9   0    7.45    0.29
  -4   9   0    6.84    0.35
   4   9   0    7.36    0.23
   4   9   0    7.25    0.30
   5   9   0   -0.04    0.05
  -5   9   0   -0.02    0.09
  -5   9   0   -0.08    0.05
  -5  -9   0   -0.01    0.03
  -6  -9   0   21.95    0.57
  -6   9   0   22.51    0.62
  -6   9   0   22.05    0.71
  -7   9   0    0.02    0.10
  -7  -9   0    0.01    0.04
  -7   9   0   -0.08    0.05
  -8   9   0   -0.02    0.06
  -8  -9   0    0.09    0.06
  -8   9   0   -0.03    0.09
  -9   9   0    0.04    0.10
  -9  -9   0    0.04    0.06
 -10   9   0    0.34    0.13
 -10  -9   0    0.53    0.10
 -11  -9   0    0.01    0.06
 -11   9   0   -0.09    0.11
 -12  -9   0    0.45    0.11
 -12   9   0    0.67    0.18
 -13   9   0    0.31    0.17
   0 -10   0    5.87    0.20
   0  10   0    7.04    0.30
  -1 -10   0    0.01    0.04
  -1  10   0   -0.10    0.06
   1  10   0    0.02    0.06
   1 -10   0    0.05    0.04
  -2  10   0   39.16    1.09
  -2  10   0   39.94    1.00
   2  10   0   39.34    1.01
  -2 -10   0   39.73    0.90
   3  10   0   -0.05    0.05
  -3  10   0   -0.01    0.09
  -3  10   0    0.06    0.07
  -3 -10   0   -0.04    0.03
  -4  10   0    3.50    0.27
   4  10   0    3.86    0.22
  -4  10   0    3.16    0.20
  -4 -10   0    3.28    0.15
   5  10   0   -0.02    0.06
  -5  10   0   -0.09    0.06
  -5 -10   0   -0.02    0.04
  -5  10   0    0.19    0.11
  -6  10   0   12.79    0.43
  -6  10   0   12.00    0.51
  -6 -10   0   12.01    0.37
  -7  10   0    0.01    0.06
  -7  10   0    0.14    0.11
  -7 -10   0   -0.04    0.04
  -8  10   0    8.38    0.34
  -8  10   0    8.60    0.43
  -8 -10   0    8.09    0.30
  -9 -10   0   -0.08    0.05
  -9  10   0    0.03    0.12
 -10 -10   0   -0.02    0.06
 -10  10   0    0.02    0.11
 -11 -10   0    0.02    0.07
 -12 -10   0    0.13    0.09
   0  11   0   -0.03    0.06
   0 -11   0    0.04    0.04
   1 -11   0    0.02    0.04
  -1  11   0   -0.02    0.08
   1  11   0    0.09    0.08
  -1 -11   0    0.00    0.03
   2  11   0    5.84    0.29
  -2  11   0    5.62    0.28
  -2 -11   0    5.90    0.21
  -3  11   0    0.16    0.12
  -3 -11   0    0.01    0.04
   3  11   0    0.03    0.07
  -3  11   0   -0.03    0.06
  -4  11   0   15.12    0.50
   4  11   0   14.83    0.51
  -4  11   0   13.72    0.78
  -4 -11   0   14.83    0.41
   5  11   0   -0.03    0.08
  -5 -11   0    0.01    0.04
  -5  11   0   -0.02    0.07
  -6  11   0    1.13    0.15
  -6 -11   0    1.22    0.12
  -7  11   0    0.04    0.08
  -7 -11   0   -0.10    0.04
  -8 -11   0    1.02    0.12
  -8  11   0    1.22    0.16
  -9 -11   0   -0.02    0.06
 -10 -11   0    0.03    0.06
 -11 -11   0    0.00    0.07
   0  12   0   36.56    1.00
   1  12   0   -0.04    0.09
  -1  12   0   -0.08    0.08
   2  12   0    5.21    0.29
  -2  12   0    5.47    0.29
  -3  12   0   -0.01    0.07
   3  12   0   -0.07    0.07
  -4  12   0    1.67    0.18
   4  12   0    1.93    0.21
  -5  12   0   -0.04    0.08
   5  12   0    0.09    0.09
  -6  12   0   20.84    0.65
  -7  12   0   -0.06    0.08
  -8  12   0    0.46    0.12
   0  13   0    0.13    0.09
   1  13   0    0.04    0.08
  -1  13   0   -0.05    0.09
   2  13   0    3.45    0.25
  -2  13   0    3.87    0.26
   3  13   0   -0.07    0.08
  -3  13   0    0.09    0.09
   4  13   0    0.27    0.12
  -4  13   0    0.27    0.11
  -5  13   0   -0.05    0.07
   5  13   0   -0.11    0.07
  -6  13   0    3.19    0.24
  -7  13   0    0.09    0.10
  -8  13   0    0.04    0.10
   0  14   0    6.32    0.35
  -1  14   0    0.04    0.09
   1  14   0   -0.09    0.08
  -2  14   0   -0.03    0.09
   2  14   0   -0.06    0.09
   3  14   0    0.09    0.10
  -3  14   0    0.04    0.11
   4  14   0    0.22    0.12
  -4  14   0   -0.04    0.09
  -5  14   0   -0.10    0.08
   5  14   0    0.01    0.09
  -6  14   0    0.34    0.13
  -7  14   0   -0.01    0.09
   0  15   0   -0.02    0.09
   1  15   0    0.23    0.12
  -1  15   0    0.00    0.09
  -2  15   0    0.00    0.11
   2  15   0   -0.05    0.09
   3  15   0   -0.09    0.09
  -3  15   0   -0.07    0.09
   4  15   0    0.18    0.12
   5  15   0    0.02    0.11
  -1   0  -1   -0.01    0.01
   1   0   1    0.04    0.01
  -1   0   1   -0.01    0.01
  -2   0   1   -0.12    0.01
  -2   0  -1   -0.09    0.02
   2   0   1   -0.10    0.01
  -3   0   1   -0.06    0.01
  -3   0   1   -0.06    0.02
   3   0   1   -0.06    0.02
  -3   0  -1   -0.01    0.02
  -3   0  -1   -0.04    0.01
   4   0   1    0.02    0.02
  -4   0   1    0.04    0.02
  -4   0   1    0.01    0.01
  -4   0  -1    0.01    0.01
  -4   0  -1   -0.02    0.02
  -5   0   1    0.01    0.02
  -5   0  -1    0.01    0.01
  -5   0   1   -0.03    0.03
  -5   0  -1    0.00    0.03
  -6   0  -1   -0.01    0.02
  -6   0   1   -0.01    0.02
  -6   0  -1    0.03    0.04
  -6   0   1    0.02    0.03
  -7   0   1   -0.03    0.03
  -7   0  -1    0.01    0.03
  -7   0  -1   -0.01    0.02
  -7   0   1   -0.02    0.02
  -8   0   1   -0.05    0.03
  -8   0  -1    0.00    0.05
  -8   0   1   -0.01    0.02
  -9   0   1   -0.02    0.04
  -9   0  -1    0.01    0.05
 -10   0  -1    0.00    0.05
 -10   0   1   -0.02    0.05
 -11   0   1    0.04    0.06
 -11   0  -1   -0.04    0.06
 -12   0  -1    0.09    0.07
 -12   0   1   -0.03    0.06
 -13   0   1    0.00    0.07
 -13   0  -1    0.05    0.07
 -14   0  -1    0.00    0.08
 -14   0   1   -0.04    0.06
 -15   0  -1    0.02    0.08
 -15   0   1    0.07    0.09
   0   1  -1   -0.21    0.02
   0   1  -1   -0.23    0.01
   0   1   1   -0.19    0.01
  -1   1   1   26.41    0.57
  -1  -1  -1   27.23    0.56
  -1   1   1   26.82    0.56
  -1   1  -1   26.37    0.57
   1   1   1   26.66    0.56
   1   1   1   26.37    0.56
  -1  -1   1   27.39    0.56
  -1   1  -1   26.98    0.58
  -2   1   1   78.40    1.96
   2  -1   1   82.66    1.70
  -2   1   1   80.71    1.72
  -2  -1  -1   80.68    1.72
   2   1   1   79.25    1.69
  -2   1  -1   81.41    1.71
  -2   1  -1   80.10    1.68
   2   1   1   80.95    1.69
  -3  -1  -1   10.73    0.26
  -3   1   1   10.58    0.24
  -3   1   1   10.70    0.26
   3   1   1   10.58    0.25
  -3   1  -1   10.61    0.23
  -3  -1   1   10.11    0.25
  -4   1   1    9.28    0.22
  -4  -1  -1    9.31    0.25
  -4   1   1    9.38    0.25
  -4   1  -1    9.66    0.21
  -4  -1   1    9.18    0.24
  -4   1  -1    9.19    0.25
   4   1   1    9.51    0.24
  -5   1   1    4.56    0.16
  -5   1   1    4.62    0.13
  -5  -1  -1    4.46    0.15
  -5   1  -1    4.64    0.12
   5   1   1    4.41    0.15
  -5  -1   1    4.48    0.15
  -5   1  -1    4.41    0.16
  -6  -1  -1   26.06    0.63
  -6   1   1   26.67    0.58
  -6   1   1   25.97    0.63
  -6  -1  -1   26.08    0.57
  -6   1  -1   27.10    0.57
  -6   1  -1   25.61    0.63
  -6  -1   1   26.65    0.63
  -7  -1  -1    0.27    0.05
  -7   1   1    0.32    0.04
  -7   1   1    0.39    0.06
  -7  -1  -1    0.35    0.03
  -7  -1   1    0.30    0.05
  -7   1  -1    0.34    0.03
  -7   1  -1    0.34    0.07
  -7  -1   1    0.28    0.04
  -8   1   1    7.47    0.20
  -8   1   1    7.17    0.26
  -8  -1  -1    7.09    0.25
  -8  -1   1    7.40    0.20
  -8  -1   1    7.51    0.26
  -8   1  -1    7.74    0.27
  -9   1   1    1.42    0.13
  -9  -1   1    1.29    0.12
  -9   1  -1    1.23    0.12
 -10  -1  -1   32.75    0.83
 -10   1   1   33.92    0.84
 -10   1  -1   33.00    0.85
 -10  -1   1   32.17    0.83
 -11   1   1   11.79    0.40
 -11  -1  -1   11.23    0.39
 -11  -1   1   11.27    0.39
 -11   1  -1   11.30    0.40
 -12   1   1    1.08    0.14
 -12  -1  -1    0.98    0.14
 -12  -1   1    1.01    0.13
 -12   1  -1    1.29    0.16
 -13   1   1    0.03    0.07
 -13  -1  -1   -0.06    0.06
 -13  -1   1   -0.13    0.06
 -13   1  -1    0.01    0.07
 -14  -1  -1    7.65    0.36
 -14   1   1    7.86    0.36
 -14  -1   1    7.39    0.34
 -14   1  -1    7.74    0.36
 -15  -1  -1    5.69    0.32
 -15   1   1    5.97    0.33
 -15  -1   1    5.62    0.32
 -15   1  -1    5.28    0.31
   0   2  -1  454.19    9.68
   0   2  -1  464.02    9.54
   0   2   1  457.33    9.55
  -1   2   1    0.33    0.03
  -1   2   1    0.28    0.04
   1   2  -1    0.24    0.04
  -1  -2  -1    0.28    0.02
  -1   2  -1    0.23    0.03
  -1  -2   1    0.30    0.03
   1   2   1    0.23    0.02
   1   2   1    0.26    0.03
  -1   2  -1    0.32    0.05
  -2   2   1   21.35    0.47
  -2   2   1   21.07    0.46
  -2  -2  -1   20.53    0.46
  -2  -2   1   20.67    0.46
  -2   2  -1   21.59    0.50
   2   2   1   21.11    0.47
  -2   2  -1   21.22    0.47
   2   2   1   21.13    0.46
  -3   2   1   27.53    0.63
  -3   2   1   27.90    0.61
  -3  -2  -1   28.18    0.62
   3   2   1   28.08    0.61
   3   2   1   28.52    0.61
  -3  -2   1   27.89    0.62
  -3   2  -1   28.49    0.61
  -4   2   1   -0.01    0.03
  -4  -2  -1    0.02    0.02
  -4   2   1    0.06    0.02
  -4   2  -1    0.03    0.03
  -4   2  -1    0.03    0.02
   4   2   1    0.07    0.03
  -4  -2   1    0.04    0.02
  -5  -2  -1   20.68    0.50
  -5   2   1   20.63    0.51
  -5   2   1   20.83    0.47
   5   2   1   21.05    0.49
  -5   2  -1   21.11    0.52
  -5   2  -1   20.68    0.46
  -5  -2   1   20.73    0.50
  -6   2   1   15.83    0.42
  -6   2   1   15.88    0.37
  -6  -2  -1   15.36    0.40
  -6   2  -1   16.20    0.36
  -6  -2   1   15.25    0.40
  -6   2  -1   15.85    0.43
   6   2   1   15.51    0.40
  -7  -2  -1    1.19    0.09
  -7   2   1    1.39    0.07
  -7   2   1    1.18    0.09
  -7   2  -1    1.32    0.06
  -7  -2   1    1.50    0.10
  -7   2  -1    1.39    0.12
  -8   2   1    0.18    0.05
  -8  -2  -1    0.10    0.05
  -8   2   1    0.13    0.03
  -8  -2   1    0.08    0.04
  -8   2  -1    0.19    0.06
  -9  -2  -1    2.97    0.16
  -9   2   1    3.16    0.17
  -9  -2   1    3.25    0.16
  -9   2  -1    2.97    0.18
 -10  -2  -1    0.52    0.09
 -10   2   1    0.72    0.11
 -10  -2   1    0.63    0.09
 -10   2  -1    0.79    0.12
 -11   2   1    0.19    0.08
 -11  -2  -1    0.37    0.08
 -11   2  -1    0.23    0.08
 -11  -2   1    0.37    0.09
 -12   2   1    0.41    0.10
 -12  -2  -1    0.70    0.11
 -12   2  -1    0.56    0.11
 -12  -2   1    0.76    0.12
 -13  -2  -1    0.97    0.14
 -13   2   1    0.55    0.12
 -13   2  -1    0.53    0.13
 -13  -2   1    0.71    0.12
 -14   2   1    0.20    0.09
 -14  -2  -1    0.33    0.10
 -14   2  -1    0.15    0.10
 -14  -2   1    0.26    0.10
 -15  -2  -1    0.41    0.13
 -15   2   1    0.78    0.15
 -15   2  -1    0.46    0.14
 -15  -2   1    0.49    0.12
   0   3  -1   -0.05    0.05
   0   3  -1   -0.01    0.03
   0   3  -1   -0.03    0.01
   0   3   1   -0.02    0.02
   1   3  -1    2.77    0.08
  -1   3   1    2.87    0.12
   1   3  -1    2.67    0.11
  -1   3   1    2.80    0.10
  -1  -3  -1    2.73    0.08
  -1  -3   1    2.70    0.08
  -1   3  -1    2.56    0.13
   1   3   1    2.69    0.10
  -1   3  -1    2.71    0.10
   1   3   1    2.72    0.08
  -2   3   1    2.14    0.10
  -2   3   1    2.14    0.08
  -2  -3  -1    2.23    0.07
   2   3  -1    2.04    0.09
   2   3  -1    2.00    0.07
   2   3   1    2.16    0.07
  -2   3  -1    2.18    0.09
  -2  -3   1    2.16    0.08
   2   3   1    2.22    0.09
  -2   3  -1    2.08    0.11
  -3   3   1    0.05    0.02
  -3   3   1    0.05    0.03
  -3  -3  -1    0.06    0.02
  -3   3  -1    0.08    0.03
   3   3   1    0.07    0.03
   3   3   1    0.07    0.02
  -3   3  -1    0.03    0.04
  -3  -3   1    0.10    0.03
  -4   3   1    5.09    0.15
  -4   3   1    4.91    0.17
  -4  -3  -1    5.09    0.16
  -4  -3   1    5.05    0.16
   4   3   1    4.82    0.15
  -4   3  -1    4.90    0.18
  -4   3  -1    4.83    0.15
  -5   3   1   10.08    0.29
  -5  -3  -1    9.74    0.27
  -5   3   1    9.91    0.26
  -5  -3   1    9.74    0.27
  -5   3  -1   10.02    0.31
  -5   3  -1   10.18    0.26
   5   3   1    9.93    0.27
  -6  -3  -1   10.25    0.29
  -6   3   1   10.20    0.30
  -6   3   1    9.97    0.26
  -6  -3   1   10.11    0.29
  -6   3  -1   10.21    0.32
   6   3   1   10.16    0.28
  -6   3  -1    9.47    0.26
  -7  -3  -1    1.35    0.09
  -7   3   1    1.61    0.11
  -7   3   1    1.57    0.08
  -7   3  -1    1.52    0.08
  -7  -3   1    1.36    0.10
  -7   3  -1    1.50    0.13
  -8   3   1    1.24    0.12
  -8  -3  -1    1.16    0.11
  -8   3   1    1.06    0.07
  -8   3  -1    1.26    0.13
  -8  -3   1    1.12    0.10
  -9  -3  -1   14.91    0.44
  -9   3   1   14.94    0.46
  -9   3  -1   15.13    0.47
  -9  -3   1   15.33    0.44
 -10   3   1    0.63    0.11
 -10  -3  -1    0.56    0.09
 -10   3  -1    0.43    0.10
 -10  -3   1    0.52    0.09
 -11   3   1    9.26    0.36
 -11  -3  -1    8.98    0.34
 -11  -3   1    9.03    0.34
 -11   3  -1    9.60    0.37
 -12   3   1    0.12    0.09
 -12  -3  -1    0.13    0.07
 -12  -3   1    0.07    0.07
 -12   3  -1    0.04    0.08
 -13  -3  -1    0.44    0.11
 -13   3   1    0.33    0.11
 -13  -3   1    0.44    0.10
 -13   3  -1    0.35    0.11
 -14  -3  -1    2.59    0.20
 -14   3   1    2.33    0.23
 -14  -3   1    1.97    0.20
 -14   3  -1    1.82    0.22
 -15   3   1    0.60    0.14
 -15   3  -1    0.85    0.19
   0   4  -1   20.13    0.49
   0   4   1   20.64    0.44
   0   4  -1   19.78    0.54
   0   4   1   20.89    0.48
   0   4  -1   20.70    0.43
  -1   4   1   45.97    1.02
  -1  -4  -1   45.27    0.95
   1   4  -1   44.78    1.00
  -1   4   1   43.73    0.98
   1   4  -1   46.01    0.95
   1   4   1   45.31    0.99
  -1   4  -1   44.24    0.99
  -1  -4   1   45.91    0.96
  -1   4  -1   45.06    1.05
   1   4   1   45.40    0.95
  -2  -4  -1   20.70    0.47
   2   4  -1   20.83    0.46
  -2   4   1   20.41    0.49
   2   4  -1   20.45    0.51
  -2   4   1   21.20    0.52
  -2  -4   1   21.27    0.47
   2   4   1   21.11    0.47
  -2   4  -1   20.72    0.49
  -2   4  -1   21.88    0.55
   2   4   1   20.57    0.50
   3   4  -1    0.44    0.04
   3   4  -1    0.47    0.06
  -3   4   1    0.34    0.06
  -3   4   1    0.47    0.05
  -3  -4  -1    0.55    0.05
  -3   4  -1    0.45    0.07
   3   4   1    0.39    0.04
  -3   4  -1    0.51    0.06
   3   4   1    0.52    0.06
  -3  -4   1    0.42    0.04
  -4   4   1    1.36    0.08
  -4  -4  -1    1.46    0.07
  -4   4   1    1.36    0.10
  -4  -4   1    1.50    0.08
  -4   4  -1    1.37    0.11
   4   4   1    1.28    0.07
  -4   4  -1    1.52    0.08
   4   4   1    1.40    0.08
  -5   4   1   15.27    0.40
  -5  -4  -1   13.97    0.37
  -5   4   1   14.10    0.36
  -5   4  -1   14.44    0.36
  -5   4  -1   14.48    0.42
  -5  -4   1   14.64    0.37
   5   4   1   14.51    0.37
  -6  -4  -1    5.36    0.19
  -6   4   1    6.43    0.23
  -6   4   1    5.92    0.18
  -6   4  -1    5.76    0.23
  -6  -4   1    5.79    0.20
   6   4   1    5.49    0.19
  -6   4  -1    5.79    0.18
  -7  -4  -1    6.28    0.22
  -7   4   1    6.10    0.24
  -7   4   1    6.11    0.19
  -7  -4   1    5.75    0.21
  -7   4  -1    6.09    0.25
  -7   4  -1    6.39    0.20
  -8  -4  -1    1.60    0.11
  -8   4   1    1.56    0.10
  -8   4   1    1.85    0.14
  -8   4  -1    1.70    0.16
  -8  -4   1    1.75    0.11
  -9   4   1   24.47    0.68
  -9  -4  -1   24.96    0.65
  -9  -4   1   24.27    0.64
  -9   4  -1   25.27    0.70
 -10  -4  -1    5.47    0.24
 -10   4   1    5.33    0.26
 -10  -4   1    5.50    0.24
 -10   4  -1    5.42    0.27
 -11   4   1    0.20    0.09
 -11  -4  -1    0.26    0.08
 -11  -4   1    0.21    0.07
 -11   4  -1    0.28    0.09
 -12  -4  -1    0.31    0.09
 -12   4   1    0.32    0.11
 -12   4  -1    0.37    0.12
 -12  -4   1    0.54    0.10
 -13  -4  -1    0.17    0.08
 -13   4   1    0.12    0.09
 -13  -4   1    0.28    0.09
 -13   4  -1    0.20    0.10
 -14   4   1    2.45    0.25
 -14  -4  -1    2.47    0.20
 -14  -4   1    2.73    0.21
 -14   4  -1    2.46    0.26
   0   5  -1   -0.04    0.03
   0  -5  -1    0.00    0.01
   0   5  -1    0.05    0.06
   0   5   1    0.00    0.01
   0   5   1    0.03    0.03
   0   5  -1   -0.02    0.01
  -1   5   1    1.94    0.13
  -1   5   1    1.67    0.09
  -1  -5  -1    1.74    0.07
   1   5  -1    1.70    0.06
   1   5  -1    1.76    0.10
  -1  -5   1    1.72    0.07
  -1   5  -1    1.78    0.05
  -1   5  -1    1.76    0.10
   1   5   1    1.72    0.07
  -1   5  -1    1.89    0.14
   1   5   1    1.71    0.10
  -2   5   1   23.85    0.57
  -2   5   1   24.22    0.61
  -2  -5  -1   24.53    0.54
   2   5  -1   24.18    0.53
   2   5  -1   23.86    0.59
  -2  -5   1   24.80    0.55
   2   5   1   24.28    0.58
  -2   5  -1   23.63    0.58
   2   5   1   23.94    0.54
  -2   5  -1   24.08    0.64
   3   5  -1   39.78    0.86
  -3   5   1   39.62    0.89
   3   5  -1   39.74    0.91
  -3  -5  -1   39.46    0.87
  -3   5   1   39.34    0.93
   3   5   1   40.07    0.86
   3   5   1   39.65    0.90
  -3  -5   1   39.67    0.87
  -3   5  -1   39.19    0.96
  -3   5  -1   39.70    0.90
  -4   5   1   28.96    0.68
  -4  -5  -1   28.73    0.66
  -4   5   1   29.65    0.72
  -4   5  -1   29.19    0.74
  -4   5  -1   28.74    0.68
  -4  -5   1   30.35    0.67
   4   5   1   29.53    0.66
   4   5   1   28.78    0.69
  -5  -5  -1   15.26    0.39
  -5   5   1   15.44    0.40
  -5   5   1   15.50    0.44
   5   5   1   15.26    0.39
  -5  -5   1   15.39    0.39
  -5   5  -1   15.19    0.40
  -5   5  -1   15.48    0.46
   5   5   1   15.36    0.41
  -6   5   1    3.92    0.19
  -6   5   1    3.72    0.15
  -6  -5  -1    3.64    0.15
  -6  -5   1    3.91    0.16
  -6   5  -1    3.76    0.20
   6   5   1    3.61    0.15
  -6   5  -1    3.80    0.15
  -7   5   1    3.82    0.19
  -7   5   1    3.72    0.15
  -7  -5  -1    3.56    0.16
  -7  -5   1    3.80    0.16
   7   5   1    3.43    0.16
  -7   5  -1    3.54    0.15
  -7   5  -1    3.60    0.20
  -8   5   1   25.31    0.61
  -8  -5  -1   25.60    0.65
  -8   5   1   26.01    0.70
  -8   5  -1   24.96    0.62
  -8  -5   1   24.96    0.64
  -8   5  -1   25.73    0.71
  -9  -5  -1    1.22    0.12
  -9   5   1    1.34    0.15
  -9  -5   1    1.67    0.14
  -9   5  -1    1.21    0.16
 -10  -5  -1   22.09    0.62
 -10   5   1   23.10    0.68
 -10   5  -1   23.59    0.70
 -10  -5   1   22.81    0.63
 -11   5   1    9.50    0.39
 -11  -5  -1    9.06    0.34
 -11   5  -1    9.65    0.41
 -11  -5   1    9.64    0.35
 -12  -5  -1    2.04    0.16
 -12   5   1    2.50    0.24
 -12  -5   1    1.81    0.17
 -12   5  -1    2.13    0.23
 -13   5   1   -0.03    0.09
 -13  -5  -1   -0.04    0.06
 -13  -5   1   -0.03    0.05
 -13   5  -1    0.06    0.09
 -14  -5  -1    1.76    0.19
 -14   5   1    1.34    0.20
 -14  -5   1    1.61    0.18
 -14   5  -1    1.42    0.21
   0   6   1    0.74    0.04
   0   6  -1    0.76    0.09
   0  -6   1    0.68    0.05
   0   6   1    0.81    0.08
   0  -6  -1    0.82    0.05
   0   6  -1    0.78    0.04
   1   6  -1   19.76    0.43
   1   6  -1   20.05    0.52
  -1   6   1   19.02    0.54
  -1  -6  -1   19.80    0.44
  -1   6   1   19.43    0.50
  -1  -6   1   19.00    0.45
  -1   6  -1   19.97    0.41
   1   6   1   19.92    0.50
   1   6   1   19.33    0.44
  -1   6  -1   19.37    0.57
  -1   6  -1   18.10    0.50
  -2   6   1    0.43    0.08
  -2   6   1    0.28    0.06
  -2  -6  -1    0.33    0.04
   2   6  -1    0.49    0.08
   2   6  -1    0.35    0.04
   2   6   1    0.46    0.07
   2   6   1    0.42    0.04
  -2   6  -1    0.33    0.06
  -2  -6   1    0.35    0.04
  -2   6  -1    0.36    0.09
   3   6  -1    2.66    0.14
  -3   6   1    2.52    0.16
   3   6  -1    2.43    0.10
  -3   6   1    2.49    0.13
  -3  -6  -1    2.75    0.11
   3   6   1    2.88    0.14
   3   6   1    2.50    0.10
  -3   6  -1    2.56    0.13
  -3  -6   1    2.61    0.11
  -3   6  -1    2.68    0.17
  -4   6   1   11.18    0.36
  -4   6   1   11.03    0.32
   4   6  -1   10.60    0.34
  -4  -6  -1   11.19    0.29
  -4   6  -1   10.72    0.38
  -4  -6   1   10.55    0.29
  -4   6  -1   11.34    0.33
   4   6   1   11.24    0.33
   4   6   1   10.39    0.29
  -5   6   1    6.31    0.26
  -5  -6  -1    6.25    0.20
  -5   6   1    6.57    0.22
  -5   6  -1    6.01    0.22
   5   6   1    6.24    0.23
   5   6   1    6.32    0.20
  -5   6  -1    6.56    0.28
  -5  -6   1    6.29    0.21
  -6   6   1    3.17    0.15
  -6  -6  -1    3.31    0.14
  -6   6   1    3.32    0.19
   6   6   1    3.45    0.15
  -6  -6   1    3.33    0.15
  -6   6  -1    3.17    0.15
  -6   6  -1    3.38    0.20
  -7   6   1   19.39    0.57
  -7  -6  -1   19.45    0.51
  -7   6   1   18.74    0.50
  -7   6  -1   19.49    0.51
  -7  -6   1   19.71    0.51
  -7   6  -1   19.68    0.59
   7   6   1   19.68    0.51
  -8  -6  -1    2.76    0.15
  -8   6   1    3.07    0.20
  -8   6   1    2.82    0.15
  -8  -6   1    2.54    0.15
  -8   6  -1    3.20    0.15
  -8   6  -1    2.89    0.21
  -9  -6  -1    0.05    0.05
  -9   6   1   -0.05    0.07
  -9  -6   1    0.04    0.06
  -9   6  -1    0.04    0.08
 -10   6   1    7.74    0.34
 -10  -6  -1    7.10    0.28
 -10  -6   1    7.56    0.29
 -10   6  -1    6.26    0.33
 -11  -6  -1    0.01    0.06
 -11   6   1    0.05    0.08
 -11   6  -1    0.10    0.10
 -11  -6   1    0.00    0.06
 -12  -6  -1    0.59    0.11
 -12   6   1    0.34    0.12
 -12  -6   1    0.39    0.09
 -12   6  -1    0.20    0.11
 -13   6   1    0.16    0.10
 -13  -6  -1    0.26    0.09
 -13   6  -1    0.30    0.12
 -13  -6   1    0.29    0.10
 -14  -6  -1    0.12    0.08
 -14   6   1    0.21    0.12
 -14  -6   1    0.10    0.09
 -14   6  -1    0.23    0.14
   0   7   1   -0.02    0.04
   0   7   1   -0.02    0.02
   0  -7   1   -0.01    0.02
   0   7  -1    0.01    0.01
   0   7  -1   -0.01    0.04
   0  -7  -1    0.04    0.02
  -1   7   1    0.98    0.05
   1   7  -1    0.92    0.05
  -1  -7  -1    0.95    0.06
   1   7  -1    0.90    0.10
  -1   7   1    1.09    0.13
  -1   7   1    0.90    0.09
   1   7   1    1.02    0.10
  -1   7  -1    0.80    0.04
  -1   7  -1    1.00    0.14
  -1  -7   1    1.04    0.07
   1   7   1    0.94    0.06
  -1   7  -1    0.86    0.10
  -2   7   1    0.86    0.12
  -2  -7  -1    0.82    0.06
   2   7  -1    0.69    0.09
  -2   7   1    0.99    0.10
   2   7  -1    0.74    0.05
  -2   7  -1    0.76    0.09
  -2  -7   1    0.77    0.06
  -2   7  -1    0.68    0.12
   2   7   1    0.80    0.05
   2   7   1    0.81    0.10
   3   7  -1    0.09    0.03
  -3  -7  -1    0.07    0.03
  -3   7   1    0.04    0.06
   3   7  -1    0.07    0.05
  -3   7   1    0.07    0.04
  -3  -7   1    0.04    0.03
   3   7   1    0.04    0.03
  -3   7  -1    0.06    0.07
   3   7   1    0.08    0.05
  -3   7  -1    0.08    0.05
  -4  -7  -1    7.41    0.22
   4   7  -1    7.06    0.27
  -4   7   1    7.51    0.30
  -4   7   1    7.45    0.25
  -4   7  -1    7.38    0.32
   4   7   1    7.15    0.26
  -4   7  -1    7.02    0.26
   4   7   1    7.13    0.22
  -4  -7   1    7.34    0.23
  -5   7   1    1.91    0.13
  -5  -7  -1    1.89    0.11
  -5   7   1    2.06    0.18
  -5   7  -1    2.03    0.19
  -5  -7   1    2.00    0.11
  -5   7  -1    2.04    0.13
   5   7   1    1.74    0.12
   5   7   1    1.86    0.10
  -6  -7  -1    0.98    0.09
  -6   7   1    0.81    0.10
  -6   7   1    1.03    0.14
   6   7   1    0.86    0.09
  -6   7  -1    0.96    0.11
  -6   7  -1    1.30    0.16
  -6  -7   1    0.92    0.09
  -7   7   1   13.51    0.46
  -7  -7  -1   13.61    0.39
  -7   7   1   13.66    0.40
  -7   7  -1   13.67    0.48
  -7  -7   1   13.15    0.39
   7   7   1   12.97    0.38
  -7   7  -1   12.72    0.39
  -8   7   1    0.07    0.09
  -8  -7  -1    0.11    0.06
  -8   7   1    0.03    0.06
  -8  -7   1    0.07    0.05
  -8   7  -1    0.07    0.06
  -8   7  -1    0.28    0.11
  -9  -7  -1   14.52    0.44
  -9   7   1   14.52    0.52
  -9  -7   1   14.94    0.45
  -9   7  -1   15.75    0.55
 -10  -7  -1    3.30    0.19
 -10   7   1    3.54    0.25
 -10  -7   1    3.44    0.19
 -10   7  -1    3.71    0.27
 -11   7   1    0.06    0.09
 -11  -7  -1    0.00    0.06
 -11   7  -1   -0.05    0.09
 -11  -7   1    0.00    0.06
 -12   7   1    0.08    0.10
 -12  -7  -1    0.09    0.07
 -12   7  -1   -0.03    0.10
 -12  -7   1    0.13    0.08
 -13  -7  -1    3.15    0.21
 -13   7   1    3.74    0.29
 -13   7  -1    3.74    0.34
 -13  -7   1    3.00    0.21
 -14   7   1    3.69    0.34
 -14   7  -1    4.87    0.61
   0   8  -1    0.55    0.09
   0   8   1    0.62    0.04
   0  -8   1    0.65    0.06
   0   8   1    0.57    0.09
   0  -8  -1    0.62    0.06
  -1  -8  -1    8.81    0.24
   1   8  -1    8.80    0.32
  -1   8   1    9.59    0.32
  -1   8  -1    9.16    0.38
  -1  -8   1    9.15    0.25
   1   8   1    8.69    0.23
   1   8   1    9.62    0.32
  -1   8  -1    8.71    0.31
  -2   8   1    2.40    0.15
   2   8  -1    2.33    0.09
  -2  -8  -1    2.13    0.10
  -2   8   1    2.87    0.20
   2   8  -1    2.36    0.16
   2   8   1    2.62    0.15
   2   8   1    2.47    0.10
  -2   8  -1    2.40    0.15
  -2   8  -1    2.71    0.21
  -2  -8   1    2.47    0.11
   3   8  -1    0.62    0.06
  -3   8   1    0.56    0.09
  -3  -8  -1    0.57    0.06
   3   8  -1    0.79    0.11
  -3   8   1    0.94    0.14
  -3  -8   1    0.63    0.06
   3   8   1    0.62    0.06
  -3   8  -1    0.56    0.12
   3   8   1    0.63    0.09
  -3   8  -1    0.72    0.10
  -4   8   1    3.56    0.22
  -4  -8  -1    3.28    0.14
  -4   8   1    3.16    0.17
   4   8  -1    3.48    0.19
  -4   8  -1    3.48    0.18
   4   8   1    3.14    0.13
   4   8   1    3.52    0.18
  -4  -8   1    3.34    0.14
  -4   8  -1    3.68    0.24
  -5   8   1    5.45    0.27
  -5  -8  -1    5.01    0.19
  -5   8   1    4.84    0.21
   5   8  -1    4.88    0.23
  -5   8  -1    5.09    0.22
   5   8   1    4.86    0.23
  -5  -8   1    4.78    0.18
   5   8   1    4.78    0.18
  -5   8  -1    4.93    0.28
  -6   8   1   12.24    0.39
  -6  -8  -1   12.34    0.36
  -6   8   1   12.37    0.46
  -6  -8   1   13.11    0.37
   6   8   1   12.50    0.40
   6   8   1   13.04    0.36
  -6   8  -1   12.30    0.48
  -6   8  -1   12.53    0.40
  -7  -8  -1    3.95    0.18
  -7   8   1    4.25    0.20
  -7   8   1    4.19    0.26
  -7   8  -1    4.04    0.20
  -7  -8   1    4.06    0.18
  -7   8  -1    3.81    0.27
  -8   8   1    0.24    0.07
  -8   8   1    0.07    0.10
  -8  -8  -1    0.23    0.06
  -8  -8   1    0.27    0.07
  -8   8  -1    0.20    0.10
  -8   8  -1    0.19    0.07
  -9   8   1    2.45    0.24
  -9  -8  -1    2.20    0.15
  -9   8  -1    2.62    0.26
  -9  -8   1    2.36    0.15
 -10   8   1    1.71    0.20
 -10  -8  -1    1.44    0.15
 -10  -8   1    1.28    0.14
 -10   8  -1    1.33    0.20
 -11   8   1   -0.05    0.09
 -11  -8  -1    0.05    0.07
 -11  -8   1    0.20    0.08
 -11   8  -1    0.04    0.10
 -12   8   1    0.40    0.15
 -12  -8  -1    0.48    0.10
 -12  -8   1    0.59    0.12
 -12   8  -1    0.80    0.18
 -13  -8  -1    0.14    0.08
 -13   8   1    0.13    0.13
 -13   8  -1    0.12    0.14
 -13  -8   1    0.08    0.07
   0   9  -1   -0.06    0.05
   0  -9   1    0.01    0.03
   0   9   1   -0.02    0.05
   0  -9  -1    0.00    0.03
  -1   9   1    0.20    0.07
  -1  -9  -1    0.29    0.05
   1   9  -1    0.29    0.09
  -1   9  -1    0.14    0.07
   1  -9  -1    0.24    0.04
   1   9   1    0.32    0.08
  -1  -9   1    0.29    0.05
  -2   9   1    0.13    0.09
  -2   9   1    0.07    0.06
   2   9  -1    0.05    0.06
  -2  -9  -1    0.03    0.03
   2   9   1    0.13    0.07
  -2  -9   1    0.08    0.04
  -2   9  -1    0.08    0.06
  -2   9  -1    0.17    0.09
  -3  -9  -1    3.49    0.14
   3   9  -1    3.58    0.20
  -3   9   1    3.11    0.18
  -3   9   1    3.34    0.24
   3   9   1    3.31    0.13
  -3   9  -1    3.28    0.19
  -3  -9   1    3.12    0.14
  -3   9  -1    3.35    0.25
   3   9   1    3.37    0.19
  -4   9   1    1.85    0.16
   4   9  -1    1.95    0.17
  -4   9   1    1.34    0.18
  -4  -9  -1    1.88    0.11
  -4  -9   1    1.74    0.11
  -4   9  -1    1.71    0.16
   4   9   1    2.09    0.18
   4   9   1    1.73    0.10
  -4   9  -1    1.80    0.21
  -5   9   1    0.29    0.11
  -5  -9  -1    0.35    0.06
  -5   9   1    0.22    0.07
   5   9  -1    0.48    0.10
  -5   9  -1    0.24    0.12
  -5  -9   1    0.34    0.06
   5   9   1    0.27    0.06
   5   9   1    0.23    0.08
  -5   9  -1    0.53    0.09
  -6   9   1    0.28    0.08
  -6  -9  -1    0.26    0.06
  -6   9   1    0.22    0.11
  -6   9  -1    0.28    0.08
  -6   9  -1    0.58    0.15
  -6  -9   1    0.29    0.07
   6   9   1    0.24    0.06
   6   9   1    0.15    0.08
  -7  -9  -1    0.01    0.04
  -7   9   1    0.04    0.06
  -7   9   1    0.06    0.10
  -7   9  -1   -0.02    0.06
  -7  -9   1   -0.04    0.04
  -7   9  -1   -0.06    0.09
  -8   9   1    8.00    0.31
  -8   9   1    7.92    0.39
  -8  -9  -1    7.94    0.28
  -8  -9   1    7.39    0.28
  -8   9  -1    7.77    0.40
  -8   9  -1    7.92    0.31
  -9  -9  -1    0.12    0.06
  -9   9   1    0.16    0.11
  -9  -9   1    0.11    0.06
  -9   9  -1    0.38    0.14
 -10  -9  -1    0.53    0.10
 -10   9   1    0.57    0.16
 -10  -9   1    0.70    0.11
 -10   9  -1    0.42    0.14
 -11  -9  -1    0.28    0.09
 -11   9   1    0.14    0.12
 -11   9  -1    0.07    0.13
 -11  -9   1    0.22    0.08
 -12   9   1    0.90    0.20
 -12  -9  -1    0.76    0.12
 -12   9  -1    1.28    0.23
 -12  -9   1    0.50    0.10
 -13  -9  -1    0.34    0.12
 -13   9  -1    0.20    0.15
   0  10  -1   27.82    0.76
   0 -10  -1   26.99    0.64
   0  10   1   27.35    0.74
   0 -10   1   27.21    0.65
  -1  10   1    0.57    0.10
  -1 -10  -1    0.59    0.07
   1  10  -1    0.62    0.11
   1 -10   1    0.64    0.07
  -1  10  -1    0.74    0.12
   1  10   1    0.66    0.11
  -1 -10   1    0.63    0.07
   1 -10  -1    0.42    0.06
  -2  10   1    0.62    0.11
   2  10  -1    0.76    0.12
  -2 -10  -1    0.90    0.08
  -2  10   1    0.92    0.16
   2  10   1    0.75    0.12
  -2  10  -1    0.84    0.13
  -2  10  -1    0.75    0.16
  -2 -10   1    0.79    0.08
  -3  10   1    0.03    0.09
   3  10  -1    0.05    0.07
  -3 -10  -1    0.05    0.04
  -3  10   1    0.09    0.07
  -3 -10   1    0.05    0.04
   3  10   1    0.04    0.07
  -3  10  -1    0.19    0.12
  -3  10  -1    0.08    0.07
  -4  10   1    0.06    0.10
  -4  10   1    0.06    0.07
   4  10  -1    0.03    0.08
  -4 -10  -1    0.13    0.05
  -4 -10   1    0.08    0.04
  -4  10  -1   -0.03    0.06
   4  10   1    0.09    0.07
  -4  10  -1   -0.04    0.10
  -5  10   1    2.91    0.19
  -5  10   1    3.16    0.25
   5  10  -1    2.93    0.21
  -5 -10  -1    3.11    0.15
  -5 -10   1    2.85    0.15
  -5  10  -1    2.89    0.19
   5  10   1    3.21    0.21
  -5  10  -1    3.30    0.29
  -6 -10  -1    6.30    0.24
  -6  10   1    6.23    0.36
  -6  10   1    5.92    0.28
  -6 -10   1    6.74    0.25
   6  10   1    6.67    0.32
  -6  10  -1    6.46    0.37
   6  10   1    6.99    0.31
  -6  10  -1    6.24    0.29
  -7 -10  -1    2.01    0.14
  -7  10   1    1.86    0.17
  -7  10  -1    2.10    0.19
  -7  10  -1    2.00    0.24
  -7 -10   1    1.85    0.13
  -8 -10  -1   -0.08    0.04
  -8  10   1    0.04    0.07
  -8  10  -1    0.05    0.07
  -8 -10   1    0.09    0.06
  -8  10  -1    0.06    0.12
  -9 -10  -1    2.11    0.15
  -9  10  -1    2.37    0.27
  -9 -10   1    2.16    0.16
 -10 -10  -1    0.08    0.07
 -10  10  -1    0.37    0.16
 -10 -10   1    0.39    0.10
 -11 -10  -1    2.57    0.19
 -11  10  -1    2.88    0.32
 -11 -10   1    2.43    0.18
 -12 -10  -1    0.55    0.11
 -12 -10   1    0.67    0.12
 -12  10  -1    0.47    0.19
   0 -11   1   -0.05    0.03
   0  11  -1    0.04    0.07
   0  11   1    0.05    0.08
  -1  11   1   16.96    0.54
   1  11  -1   17.43    0.56
   1 -11   1   17.07    0.44
   1  11   1   16.63    0.54
  -1  11  -1   15.94    0.54
  -1 -11   1   17.36    0.45
   2  11  -1    1.32    0.16
  -2  11   1    1.16    0.15
  -2 -11   1    1.25    0.10
   2  11   1    1.24    0.16
  -2  11  -1    1.43    0.17
  -3  11   1    1.69    0.17
   3  11  -1    1.36    0.16
  -3  11  -1    1.37    0.16
   3  11   1    1.74    0.18
  -3 -11   1    1.46    0.11
  -3  11  -1    1.32    0.21
  -4  11   1    6.80    0.30
   4  11  -1    6.43    0.31
  -4  11  -1    6.81    0.32
  -4  11  -1    6.92    0.40
  -4 -11   1    6.42    0.24
   4  11   1    6.56    0.31
   5  11  -1    1.35    0.17
  -5  11   1    1.43    0.17
  -5 -11   1    1.53    0.12
  -5  11  -1    1.64    0.23
  -5  11  -1    1.56    0.18
   5  11   1    1.60    0.18
  -6  11   1    9.48    0.38
  -6  11  -1    9.47    0.48
   6  11   1    9.39    0.38
  -6  11  -1    9.01    0.37
  -6 -11   1    9.93    0.32
  -7  11   1    2.47    0.22
  -7  11  -1    2.30    0.28
  -7 -11   1    2.67    0.16
  -7  11  -1    3.23    0.22
  -8  11   1    4.01    0.25
  -8  11  -1    4.16    0.33
  -8  11  -1    4.51    0.26
  -8 -11   1    4.32    0.22
  -9 -11   1    0.69    0.11
 -10 -11   1    0.34    0.09
 -11 -11   1    0.03    0.07
   0  12  -1    1.79    0.19
   0  12   1    1.73    0.20
  -1  12   1   20.23    0.65
   1  12  -1   20.68    0.66
  -1 -12   1   21.80    0.58
  -1  12  -1   21.13    0.66
   1  12   1   21.02    0.66
   2  12  -1    6.21    0.32
  -2  12   1    6.79    0.32
   2  12   1    6.74    0.32
  -2 -12   1    6.11    0.23
  -2  12  -1    6.27    0.32
  -3  12   1    5.85    0.30
   3  12  -1    6.21    0.32
  -3 -12   1    5.81    0.22
   3  12   1    6.53    0.32
  -3  12  -1    5.62    0.30
  -4  12   1    1.14    0.16
   4  12  -1    1.04    0.16
  -4 -12   1    1.07    0.11
  -4  12  -1    1.21    0.17
   4  12   1    1.31    0.18
   5  12  -1    4.60    0.28
  -5  12   1    4.23    0.26
   5  12   1    4.56    0.27
  -5  12  -1    4.40    0.27
  -5 -12   1    4.50    0.20
  -6  12   1    0.12    0.09
  -6 -12   1    0.02    0.05
   6  12   1    0.09    0.09
  -6  12  -1    0.09    0.09
  -7  12   1    0.03    0.07
  -7 -12   1    0.09    0.06
  -7  12  -1   -0.01    0.07
  -8  12   1    1.92    0.20
  -8 -12   1    1.91    0.16
  -8  12  -1    2.46    0.23
  -9 -12   1   -0.01    0.05
 -10 -12   1    2.22    0.22
   0  13   1    0.19    0.11
   0  13  -1   -0.03    0.08
  -1  13   1    4.64    0.29
   1  13  -1    5.19    0.31
   1  13   1    5.12    0.29
  -1  13  -1    4.61    0.29
   2  13  -1    5.74    0.32
  -2  13   1    5.27    0.30
   2  13   1    5.09    0.30
  -2  13  -1    5.18    0.30
   3  13  -1    0.04    0.09
  -3  13   1    0.25    0.10
  -3  13  -1    0.48    0.13
   3  13   1    0.11    0.09
  -4  13   1    3.14    0.23
   4  13  -1    3.19    0.24
   4  13   1    2.30    0.23
  -4  13  -1    2.83    0.25
   5  13  -1    0.77    0.16
  -5  13   1    0.68    0.14
   5  13   1    0.51    0.14
  -5  13  -1    0.76    0.14
  -6  13   1    2.13    0.22
  -6  13  -1    2.22    0.23
   6  13   1    1.90    0.21
  -7  13   1    1.90    0.22
  -7  13  -1    2.85    0.26
  -8  13   1    0.32    0.12
  -8  13  -1    0.21    0.11
   0  14   1    0.19    0.12
   0  14  -1    0.22    0.13
  -1  14   1    0.16    0.11
   1  14  -1    0.13    0.11
  -1  14  -1    0.36    0.12
   1  14   1    0.11    0.10
   2  14  -1    0.14    0.11
  -2  14   1    0.25    0.12
   2  14   1    0.37    0.13
  -2  14  -1    0.25    0.12
  -3  14   1    0.95    0.17
   3  14  -1    0.71    0.16
   3  14   1    0.76    0.16
  -3  14  -1    0.88    0.16
   4  14  -1    0.19    0.11
  -4  14   1    0.38    0.12
   4  14   1    0.31    0.13
  -4  14  -1    0.26    0.12
  -5  14   1   -0.01    0.09
   5  14   1    0.18    0.11
  -5  14  -1    0.07    0.11
  -6  14   1    0.23    0.11
   6  14   1    0.08    0.11
  -6  14  -1    0.00    0.10
  -7  14   1    0.00    0.10
  -7  14  -1    0.12    0.10
  -8  14  -1   -0.04    0.11
   0  15   1   -0.19    0.09
   0  15  -1   -0.04    0.10
   1  15  -1   -0.01    0.10
  -1  15   1    0.02    0.10
  -1  15  -1   -0.04    0.10
   1  15   1    0.04    0.11
  -2  15   1   -0.07    0.09
   2  15  -1   -0.01    0.09
   2  15   1   -0.10    0.09
  -2  15  -1    0.13    0.12
  -3  15   1    0.07    0.12
   3  15  -1    0.06    0.10
  -3  15  -1    0.06    0.10
   3  15   1   -0.02    0.09
   4  15  -1    0.09    0.11
   4  15   1    0.17    0.12
   5  15   1    0.42    0.15
   0   0  -2    4.96    0.16
   1   0   2   67.88    1.41
  -1   0   2   66.88    1.40
  -1   0  -2   64.84    1.38
  -2   0   2   11.36    0.26
   2   0   2   11.57    0.25
  -2   0  -2   10.49    0.26
   3   0   2    9.55    0.23
  -3   0   2    9.72    0.24
  -3   0  -2    9.23    0.24
  -4   0  -2   83.04    1.76
  -4   0   2   81.79    1.73
   4   0   2   84.67    1.74
  -4   0   2   81.16    1.74
  -5   0   2   12.66    0.32
  -5   0  -2   13.20    0.35
  -5   0  -2   13.63    0.28
  -5   0   2   13.51    0.34
   5   0   2   13.62    0.33
  -6   0  -2   30.88    0.64
  -6   0   2   30.48    0.68
  -6   0   2   30.73    0.71
  -6   0  -2   30.83    0.73
  -7   0  -2    7.19    0.25
  -7   0   2    7.46    0.24
  -7   0   2    7.22    0.20
  -8   0  -2   -0.03    0.04
  -8   0   2    0.02    0.03
  -8   0   2    0.00    0.03
  -9   0   2    3.94    0.19
  -9   0  -2    3.98    0.19
 -10   0   2    0.68    0.10
 -10   0  -2    0.72    0.10
 -11   0  -2   11.77    0.41
 -11   0   2   11.87    0.40
 -12   0   2    9.57    0.36
 -12   0  -2    9.84    0.38
 -13   0  -2   -0.02    0.06
 -13   0   2    0.08    0.07
 -14   0   2    0.40    0.11
 -14   0  -2    0.28    0.10
 -15   0  -2    4.67    0.30
 -15   0   2    4.73    0.29
   0   1   2   -0.85    0.01
   0   1  -2   -0.85    0.03
   1  -1   2  121.83    2.51
  -1   1   2  120.45    2.56
  -1  -1  -2  122.19    2.52
  -1   1   2  121.41    2.51
   1   1   2  123.02    2.55
  -1   1  -2  116.74    2.53
  -1   1  -2  116.96    2.54
   1   1   2  121.44    2.52
  -1  -1   2  121.68    2.54
   2  -1   2  175.96    3.64
  -2   1   2  175.40    3.66
  -2  -1  -2  177.03    3.70
  -2   1   2  176.98    3.68
  -2   1  -2  174.06    3.74
  -2   1  -2  166.91    3.63
  -2  -1   2  173.47    3.69
   2   1   2  173.99    3.62
   2   1   2  177.43    3.68
   3  -1   2    1.01    0.05
  -3   1   2    0.97    0.05
  -3  -1  -2    1.06    0.06
  -3   1   2    0.96    0.05
  -3  -1   2    0.91    0.05
  -3   1  -2    0.93    0.04
  -3   1  -2    0.97    0.06
   4  -1   2   70.87    1.46
  -4  -1  -2   68.23    1.47
  -4   1   2   69.91    1.46
  -4   1   2   68.23    1.47
  -4   1  -2   67.81    1.49
   4   1   2   68.88    1.46
  -4  -1   2   70.08    1.47
  -4   1  -2   69.69    1.43
  -5   1   2    0.02    0.02
  -5   1   2   -0.01    0.03
  -5  -1  -2    0.00    0.03
   5   1   2   -0.01    0.02
  -5  -1   2    0.02    0.03
  -5   1  -2    0.02    0.01
  -5   1  -2    0.00    0.03
  -6   1   2    4.00    0.15
  -6  -1  -2    3.83    0.10
  -6  -1  -2    3.58    0.15
  -6   1   2    3.95    0.13
  -6  -1   2    3.83    0.15
  -6   1  -2    4.06    0.17
   6   1   2    3.75    0.14
  -6   1  -2    3.92    0.10
  -7  -1  -2    0.64    0.08
  -7   1   2    0.71    0.08
  -7   1   2    0.77    0.05
  -7   1  -2    0.68    0.08
  -7   1  -2    0.76    0.04
  -7  -1   2    0.51    0.07
  -7  -1   2    0.64    0.06
  -8   1   2    2.11    0.09
  -8   1   2    2.37    0.13
  -8  -1   2    2.06    0.12
  -8  -1   2    1.98    0.09
  -8   1  -2    2.26    0.14
  -9   1   2    0.10    0.05
  -9  -1  -2    0.07    0.05
  -9  -1   2    0.12    0.05
  -9   1  -2    0.11    0.06
 -10  -1  -2    0.35    0.08
 -10   1   2    0.45    0.09
 -10  -1   2    0.47    0.09
 -10   1  -2    0.43    0.09
 -11  -1  -2    0.97    0.13
 -11   1   2    0.92    0.12
 -11  -1   2    0.90    0.12
 -11   1  -2    0.86    0.12
 -12   1   2    2.16    0.19
 -12  -1  -2    2.23    0.17
 -12   1  -2    1.97    0.19
 -12  -1   2    2.05    0.18
 -13  -1  -2    2.67    0.23
 -13   1   2    1.93    0.19
 -13   1  -2    1.90    0.20
 -13  -1   2    1.91    0.19
 -14   1   2    0.11    0.08
 -14  -1  -2    0.13    0.08
 -14  -1   2    0.03    0.07
 -14   1  -2    0.04    0.09
 -15   1   2    0.12    0.10
 -15  -1  -2   -0.08    0.07
 -15   1  -2   -0.04    0.09
 -15  -1   2    0.08    0.09
   0   2  -2  139.18    2.96
   0   2  -2  136.95    2.97
   0   2   2  148.16    3.01
  -1   2   2   41.08    0.87
  -1   2   2   41.05    0.87
  -1  -2  -2   41.74    0.86
  -1  -2   2   42.30    0.87
  -1   2  -2   39.85    0.88
  -1   2  -2   41.43    0.92
   1   2   2   41.80    0.87
   1   2   2   39.25    0.86
   2  -2   2   27.04    0.56
  -2  -2  -2   27.12    0.58
  -2   2   2   27.11    0.58
  -2   2   2   26.94    0.58
   2   2   2   26.56    0.58
  -2   2  -2   26.40    0.62
   2   2   2   26.67    0.58
  -2   2  -2   26.73    0.59
  -2  -2   2   26.55    0.58
  -3   2   2   14.70    0.34
  -3   2   2   15.06    0.35
  -3  -2  -2   14.10    0.34
  -3   2  -2   14.46    0.34
   3   2   2   15.11    0.33
  -3  -2   2   14.19    0.34
  -4   2   2    4.29    0.14
  -4  -2  -2    4.20    0.14
  -4   2   2    4.19    0.13
   4   2   2    4.23    0.13
  -4  -2   2    4.11    0.14
  -4   2  -2    4.10    0.12
  -4   2  -2    4.12    0.16
  -5   2   2   41.27    0.89
  -5  -2  -2   41.35    0.92
  -5   2   2   40.96    0.92
  -5   2  -2   41.69    0.95
  -5   2  -2   41.80    0.88
  -5  -2   2   41.90    0.92
   5   2   2   40.24    0.91
  -6   2   2    1.66    0.10
  -6  -2  -2    1.51    0.09
  -6   2   2    1.57    0.07
  -6  -2   2    1.35    0.09
   6   2   2    1.58    0.09
  -6   2  -2    1.40    0.06
  -6   2  -2    1.37    0.10
  -7  -2  -2    1.62    0.10
  -7   2   2    1.73    0.11
  -7   2   2    1.75    0.08
   7   2   2    1.60    0.10
  -7   2  -2    1.72    0.07
  -7   2  -2    1.86    0.13
  -7  -2   2    1.86    0.11
  -8  -2  -2    0.95    0.10
  -8   2   2    0.82    0.06
  -8   2   2    0.94    0.10
  -8   2  -2    1.05    0.11
  -8  -2   2    1.11    0.10
  -9  -2  -2    0.35    0.07
  -9   2   2    0.52    0.08
  -9   2  -2    0.62    0.10
  -9  -2   2    0.62    0.09
 -10  -2  -2    0.54    0.09
 -10   2   2    0.75    0.11
 -10   2  -2    0.64    0.10
 -10  -2   2    0.68    0.10
 -11  -2  -2    0.12    0.07
 -11   2   2    0.12    0.07
 -11   2  -2    0.26    0.08
 -11  -2   2    0.25    0.08
 -12   2   2    1.14    0.14
 -12  -2  -2    1.16    0.14
 -12   2  -2    0.84    0.13
 -12  -2   2    0.85    0.12
 -13   2   2    0.30    0.10
 -13  -2  -2    0.23    0.10
 -13  -2   2    0.10    0.07
 -13   2  -2    0.33    0.11
 -14   2   2    0.20    0.09
 -14  -2  -2    0.26    0.10
 -14   2  -2    0.43    0.12
 -14  -2   2    0.29    0.10
 -15  -2  -2   -0.02    0.09
 -15   2   2    0.19    0.11
 -15  -2   2    0.08    0.10
 -15   2  -2    0.07    0.12
   0   3   2   -0.05    0.02
   0   3  -2   -0.02    0.03
   0  -3  -2   -0.03    0.01
   0   3  -2   -0.04    0.05
  -1   3   2   28.58    0.64
  -1  -3  -2   29.65    0.62
   1   3  -2   29.32    0.66
  -1   3   2   30.27    0.65
  -1   3  -2   28.32    0.70
  -1  -3   2   29.04    0.63
   1   3   2   28.92    0.62
  -1   3  -2   28.58    0.65
   1   3   2   29.45    0.64
  -2   3   2   17.31    0.41
  -2  -3  -2   17.67    0.39
  -2   3   2   17.01    0.40
   2   3   2   17.39    0.39
  -2   3  -2   17.42    0.41
  -2  -3   2   17.25    0.39
  -2   3  -2   17.18    0.45
   2   3   2   17.72    0.40
  -3  -3  -2    0.85    0.05
  -3   3   2    0.86    0.06
  -3   3   2    0.86    0.05
  -3   3  -2    0.85    0.06
  -3  -3   2    0.78    0.05
  -3   3  -2    0.97    0.09
   3   3   2    0.78    0.05
   3   3   2    0.91    0.05
  -4  -3  -2    0.34    0.04
  -4   3   2    0.34    0.05
  -4   3   2    0.42    0.05
   4   3   2    0.49    0.05
  -4   3  -2    0.45    0.07
  -4   3  -2    0.37    0.04
   4   3   2    0.47    0.05
  -4  -3   2    0.43    0.05
  -5   3   2   18.70    0.44
  -5  -3  -2   18.79    0.46
  -5   3   2   18.94    0.47
  -5  -3   2   18.58    0.46
  -5   3  -2   19.36    0.50
  -5   3  -2   18.80    0.44
   5   3   2   19.07    0.45
  -6  -3  -2    0.16    0.04
  -6   3   2    0.14    0.04
  -6   3   2    0.16    0.04
   6   3   2    0.26    0.05
  -6  -3   2    0.20    0.04
  -6   3  -2    0.24    0.04
  -6   3  -2    0.24    0.06
  -7  -3  -2    1.45    0.10
  -7   3   2    1.45    0.08
  -7   3   2    1.44    0.11
   7   3   2    1.33    0.09
  -7   3  -2    1.59    0.12
  -7   3  -2    1.57    0.08
  -7  -3   2    1.49    0.10
  -8  -3  -2    1.91    0.12
  -8   3   2    1.78    0.09
  -8   3   2    1.64    0.12
  -8   3  -2    1.80    0.14
  -8  -3   2    1.72    0.11
  -9   3   2   12.29    0.39
  -9  -3  -2   12.15    0.38
  -9   3  -2   12.35    0.42
  -9  -3   2   12.14    0.38
 -10   3   2    0.12    0.07
 -10  -3  -2    0.13    0.06
 -10  -3   2    0.13    0.06
 -10   3  -2    0.04    0.08
 -11   3   2   27.42    0.76
 -11  -3  -2   26.78    0.73
 -11   3  -2   28.05    0.79
 -11  -3   2   27.45    0.73
 -12   3   2    2.83    0.20
 -12  -3  -2    2.10    0.19
 -12   3  -2    2.10    0.21
 -12  -3   2    2.28    0.17
 -13  -3  -2    0.40    0.10
 -13   3   2    0.38    0.11
 -13   3  -2    0.46    0.12
 -13  -3   2    0.20    0.09
 -14   3   2    0.11    0.09
 -14  -3  -2    0.00    0.08
 -14   3  -2   -0.09    0.08
 -14  -3   2    0.00    0.07
 -15   3   2    1.26    0.19
   0   4  -2    7.49    0.27
   0   4   2    7.50    0.21
   0  -4  -2    7.74    0.18
   0   4  -2    7.10    0.22
  -1   4   2    3.30    0.14
  -1  -4  -2    3.39    0.09
   1   4  -2    3.28    0.13
  -1   4   2    3.36    0.12
  -1  -4   2    3.24    0.10
  -1   4  -2    3.47    0.17
   1   4   2    3.21    0.10
   1   4   2    3.23    0.12
  -1   4  -2    3.30    0.13
  -2   4   2    6.97    0.20
   2   4  -2    6.88    0.22
  -2  -4  -2    7.06    0.18
  -2   4   2    7.07    0.22
  -2  -4   2    6.78    0.19
  -2   4  -2    7.32    0.21
   2   4   2    6.67    0.18
  -2   4  -2    6.84    0.25
   2   4   2    7.11    0.20
  -3  -4  -2   -0.01    0.02
  -3   4   2    0.02    0.03
  -3   4   2    0.04    0.03
   3   4   2   -0.04    0.03
  -3   4  -2    0.01    0.05
  -3  -4   2    0.03    0.02
   3   4   2    0.00    0.02
  -3   4  -2    0.04    0.03
  -4   4   2   37.88    0.84
  -4  -4  -2   38.58    0.83
  -4   4   2   38.46    0.86
   4   4   2   36.77    0.84
   4   4   2   38.09    0.83
  -4   4  -2   37.01    0.90
  -4   4  -2   36.86    0.84
  -4  -4   2   37.21    0.84
  -5  -4  -2    3.19    0.13
  -5   4   2    3.22    0.13
  -5   4   2    3.16    0.15
  -5  -4   2    3.14    0.13
   5   4   2    3.31    0.13
  -5   4  -2    3.12    0.13
  -5   4  -2    3.07    0.17
   5   4   2    3.05    0.12
  -6  -4  -2    1.43    0.09
  -6   4   2    1.53    0.11
  -6   4   2    1.40    0.08
  -6  -4   2    1.48    0.09
   6   4   2    1.42    0.09
  -6   4  -2    1.56    0.09
  -6   4  -2    1.77    0.13
  -7  -4  -2    4.46    0.18
  -7   4   2    4.82    0.20
  -7   4   2    4.37    0.16
  -7  -4   2    4.77    0.18
  -7   4  -2    4.46    0.16
   7   4   2    4.93    0.18
  -7   4  -2    4.29    0.21
  -8   4   2    0.08    0.06
  -8   4   2    0.12    0.04
  -8  -4  -2    0.08    0.04
   8   4   2    0.11    0.05
  -8   4  -2    0.02    0.06
  -8  -4   2    0.09    0.05
  -9  -4  -2   -0.01    0.04
  -9   4   2    0.10    0.06
  -9  -4   2    0.08    0.05
  -9   4  -2    0.08    0.07
 -10  -4  -2    9.93    0.35
 -10   4   2   10.15    0.37
 -10   4  -2    9.86    0.39
 -10  -4   2    9.79    0.34
 -11  -4  -2    2.48    0.17
 -11   4   2    2.52    0.19
 -11   4  -2    2.20    0.22
 -11  -4   2    2.09    0.15
 -12   4   2    0.17    0.09
 -12  -4  -2    0.17    0.07
 -12   4  -2    0.13    0.09
 -12  -4   2    0.08    0.07
 -13   4   2    0.39    0.12
 -13  -4  -2    0.33    0.09
 -13  -4   2    0.45    0.11
 -13   4  -2    0.39    0.12
 -14  -4  -2    0.12    0.09
 -14   4   2    0.35    0.12
 -14  -4   2    0.22    0.09
 -14   4  -2    0.24    0.11
 -15   4   2    0.24    0.20
   0   5   2   -0.05    0.03
   0  -5  -2   -0.08    0.01
   0   5  -2   -0.05    0.04
   0   5   2   -0.08    0.01
   0   5  -2    0.00    0.06
  -1   5   2    1.33    0.08
  -1  -5  -2    1.33    0.06
   1   5  -2    1.26    0.09
  -1   5   2    1.30    0.10
  -1   5  -2    1.32    0.14
   1   5   2    1.39    0.06
  -1   5  -2    1.44    0.09
  -1  -5   2    1.42    0.07
   1   5   2    1.35    0.08
  -2  -5  -2   33.33    0.72
  -2   5   2   34.49    0.79
  -2   5   2   32.15    0.75
   2   5  -2   33.96    0.79
  -2  -5   2   33.30    0.73
  -2   5  -2   32.86    0.77
   2   5   2   32.52    0.76
  -2   5  -2   33.10    0.84
   2   5   2   32.86    0.72
  -3   5   2   40.73    0.95
  -3  -5  -2   41.14    0.90
  -3   5   2   41.78    0.92
   3   5  -2   42.57    0.96
   3   5   2   40.67    0.90
  -3   5  -2   40.98    0.94
  -3   5  -2   41.79    1.01
  -3  -5   2   40.49    0.91
   3   5   2   41.45    0.93
  -4   5   2   35.87    0.82
  -4  -5  -2   36.31    0.80
  -4   5   2   35.55    0.85
  -4   5  -2   36.12    0.83
   4   5   2   36.89    0.83
  -4   5  -2   34.44    0.89
  -4  -5   2   36.76    0.81
   4   5   2   35.91    0.80
  -5   5   2   12.82    0.38
  -5   5   2   12.70    0.34
  -5  -5  -2   12.65    0.33
  -5   5  -2   12.56    0.35
   5   5   2   12.77    0.35
  -5   5  -2   12.87    0.41
   5   5   2   12.74    0.33
  -5  -5   2   12.54    0.34
  -6   5   2    0.48    0.08
  -6  -5  -2    0.48    0.06
  -6   5   2    0.45    0.06
  -6  -5   2    0.56    0.07
  -6   5  -2    0.52    0.07
  -6   5  -2    0.49    0.09
   6   5   2    0.51    0.06
  -7   5   2    0.03    0.05
  -7  -5  -2    0.00    0.04
  -7   5   2    0.05    0.04
  -7   5  -2    0.00    0.06
  -7   5  -2    0.05    0.04
   7   5   2   -0.05    0.03
  -7  -5   2    0.01    0.03
  -8  -5  -2    0.48    0.07
  -8   5   2    0.57    0.07
  -8   5   2    0.54    0.10
  -8  -5   2    0.61    0.09
   8   5   2    0.47    0.07
  -8   5  -2    0.51    0.10
  -9   5   2    2.11    0.12
  -9   5   2    2.21    0.16
  -9  -5  -2    2.02    0.14
  -9   5  -2    1.89    0.19
  -9  -5   2    2.27    0.14
 -10   5   2    2.46    0.19
 -10  -5  -2    2.57    0.16
 -10   5  -2    2.46    0.23
 -10  -5   2    2.49    0.16
 -11   5   2    2.92    0.22
 -11  -5  -2    2.64    0.18
 -11  -5   2    2.95    0.18
 -11   5  -2    2.92    0.23
 -12  -5  -2    1.36    0.15
 -12   5   2    1.39    0.17
 -12   5  -2    1.51    0.20
 -12  -5   2    1.61    0.17
 -13   5   2    0.02    0.09
 -13  -5  -2   -0.03    0.07
 -13  -5   2   -0.04    0.06
 -13   5  -2    0.08    0.11
 -14  -5  -2   -0.04    0.08
 -14   5   2    0.17    0.12
 -14  -5   2    0.02    0.07
 -14   5  -2    0.04    0.11
   0   6  -2   20.25    0.54
   0  -6  -2   20.63    0.46
   0   6   2   20.62    0.52
   0   6   2   21.02    0.46
   1   6  -2   46.27    1.06
  -1   6   2   46.36    1.08
  -1  -6  -2   46.43    0.98
  -1   6   2   44.71    1.03
  -1   6  -2   45.00    1.13
   1   6   2   46.40    1.04
  -1   6  -2   45.40    1.05
   1   6   2   45.27    0.98
  -1  -6   2   46.53    1.00
   2   6  -2    0.01    0.04
  -2  -6  -2    0.02    0.02
  -2   6   2    0.00    0.05
  -2   6   2   -0.05    0.04
  -2   6  -2    0.02    0.04
   2   6   2   -0.02    0.04
  -2   6  -2    0.01    0.06
   2   6   2   -0.02    0.02
  -2  -6   2   -0.01    0.02
   3   6  -2   13.47    0.39
  -3  -6  -2   13.19    0.33
  -3   6   2   12.92    0.39
  -3   6   2   13.43    0.37
   3   6   2   13.62    0.37
  -3   6  -2   13.49    0.44
  -3   6  -2   12.64    0.37
  -3  -6   2   13.45    0.34
   3   6   2   13.03    0.33
  -4   6   2    9.70    0.32
  -4   6   2    9.53    0.29
  -4  -6  -2    9.40    0.26
   4   6   2    9.78    0.27
  -4   6  -2    9.49    0.36
   4   6   2    9.60    0.30
  -4   6  -2    9.79    0.30
  -4  -6   2    9.54    0.27
  -5   6   2    3.69    0.16
  -5  -6  -2    3.81    0.15
  -5   6   2    3.81    0.19
   5   6   2    3.82    0.15
  -5  -6   2    4.04    0.15
  -5   6  -2    3.75    0.22
  -5   6  -2    3.66    0.16
   5   6   2    3.88    0.17
  -6   6   2    2.54    0.13
  -6  -6  -2    2.65    0.13
  -6   6   2    2.72    0.17
   6   6   2    2.54    0.12
  -6   6  -2    2.81    0.19
  -6   6  -2    2.90    0.14
   6   6   2    2.69    0.14
  -6  -6   2    2.60    0.13
  -7   6   2    2.43    0.13
  -7   6   2    2.36    0.16
  -7  -6  -2    2.43    0.13
  -7  -6   2    2.24    0.13
  -7   6  -2    2.29    0.21
   7   6   2    2.25    0.13
  -7   6  -2    2.39    0.14
  -8  -6  -2    0.70    0.09
  -8   6   2    0.78    0.09
  -8   6   2    0.75    0.12
  -8  -6   2    0.50    0.08
  -8   6  -2    0.64    0.13
   8   6   2    0.60    0.08
  -9   6   2   57.03    1.36
  -9   6   2   56.28    1.26
  -9  -6  -2   56.06    1.29
  -9   6  -2   54.14    1.40
  -9  -6   2   55.30    1.29
 -10  -6  -2   12.85    0.41
 -10   6   2   13.61    0.48
 -10   6  -2   12.91    0.50
 -10  -6   2   13.24    0.42
 -11  -6  -2    3.22    0.19
 -11   6   2    3.42    0.24
 -11   6  -2    3.60    0.27
 -11  -6   2    2.98    0.19
 -12   6   2    0.20    0.11
 -12  -6  -2    0.13    0.07
 -12   6  -2    0.42    0.14
 -12  -6   2    0.53    0.11
 -13  -6  -2    0.03    0.08
 -13   6   2    0.12    0.11
 -13  -6   2    0.15    0.08
 -13   6  -2    0.06    0.12
 -14  -6  -2    0.74    0.14
 -14   6   2    0.73    0.17
 -14   6  -2    1.01    0.19
 -14  -6   2    0.83    0.15
   0   7  -2   -0.04    0.05
   0  -7  -2    0.01    0.02
   0   7   2   -0.05    0.04
   0  -7   2    0.01    0.02
   0   7   2   -0.01    0.02
  -1   7   2    4.99    0.20
   1   7  -2    4.62    0.20
  -1  -7  -2    4.72    0.14
  -1   7   2    5.02    0.23
  -1   7   2    4.78    0.13
  -1   7  -2    4.80    0.21
   1   7   2    4.72    0.19
  -1   7  -2    4.64    0.26
  -1  -7   2    4.77    0.16
   1   7   2    4.79    0.14
   2   7  -2    0.23    0.06
  -2  -7  -2    0.13    0.03
  -2   7   2    0.14    0.07
  -2   7   2    0.16    0.06
  -2   7  -2    0.22    0.07
  -2  -7   2    0.16    0.04
   2   7   2    0.10    0.05
   2   7   2    0.14    0.03
  -2   7  -2    0.15    0.09
  -3  -7  -2    6.44    0.20
   3   7  -2    6.93    0.26
  -3   7   2    7.02    0.24
  -3   7   2    6.91    0.28
  -3   7  -2    6.94    0.31
   3   7   2    6.97    0.25
   3   7   2    7.06    0.20
  -3   7  -2    6.93    0.26
  -3  -7   2    6.80    0.21
  -4   7   2   17.65    0.51
  -4  -7  -2   16.60    0.42
   4   7  -2   17.07    0.49
  -4   7   2   16.51    0.46
   4   7   2   16.73    0.42
  -4   7  -2   17.39    0.47
  -4   7  -2   16.64    0.54
  -4  -7   2   17.16    0.43
   4   7   2   16.89    0.47
  -5   7   2   12.51    0.37
  -5   7   2   12.32    0.41
  -5  -7  -2   12.46    0.34
  -5   7  -2   12.35    0.37
   5   7   2   12.37    0.38
   5   7   2   12.23    0.34
  -5  -7   2   12.16    0.34
  -5   7  -2   12.23    0.45
  -6   7   2    4.04    0.18
  -6   7   2    3.93    0.22
  -6  -7  -2    3.78    0.16
  -6   7  -2    3.89    0.18
   6   7   2    3.54    0.15
  -6   7  -2    3.29    0.23
   6   7   2    3.91    0.19
  -6  -7   2    3.71    0.16
  -7   7   2    4.66    0.25
  -7  -7  -2    4.38    0.19
  -7   7   2    4.71    0.20
   7   7   2    4.46    0.18
  -7   7  -2    4.67    0.27
  -7   7  -2    4.58    0.21
  -7  -7   2    4.64    0.20
  -8   7   2    0.80    0.10
  -8   7   2    0.78    0.13
  -8  -7  -2    0.84    0.10
  -8  -7   2    0.82    0.10
   8   7   2    0.67    0.09
  -8   7  -2    0.52    0.13
  -9  -7  -2    3.51    0.19
  -9   7   2    3.02    0.17
  -9   7   2    3.66    0.24
  -9   7  -2    3.93    0.27
  -9  -7   2    3.39    0.18
 -10   7   2    3.97    0.26
 -10  -7  -2    3.96    0.20
 -10  -7   2    3.70    0.20
 -10   7  -2    3.59    0.27
 -11   7   2    0.56    0.14
 -11  -7  -2    0.48    0.09
 -11   7  -2    0.42    0.15
 -11  -7   2    0.46    0.10
 -12  -7  -2    2.53    0.18
 -12   7   2    2.30    0.24
 -12   7  -2    2.45    0.27
 -12  -7   2    2.46    0.18
 -13  -7  -2    3.48    0.22
 -13   7   2    3.63    0.29
 -13  -7   2    3.13    0.22
 -13   7  -2    3.74    0.35
 -14   7   2    0.63    0.17
   0   8   2    3.60    0.12
   0   8  -2    3.99    0.20
   0  -8  -2    3.61    0.12
   0  -8   2    3.84    0.14
   0   8   2    3.36    0.17
  -1   8   2   23.72    0.61
   1   8  -2   22.98    0.63
  -1  -8  -2   23.56    0.53
  -1   8   2   23.39    0.53
  -1  -8   2   23.23    0.55
   1   8   2   22.78    0.53
  -1   8  -2   23.24    0.63
   1   8   2   23.88    0.62
  -1   8  -2   22.07    0.70
  -2  -8  -2    3.75    0.13
   2   8  -2    3.71    0.19
  -2   8   2    3.88    0.18
  -2   8   2    3.50    0.21
  -2   8  -2    3.66    0.25
  -2   8  -2    3.19    0.18
   2   8   2    3.65    0.18
  -2  -8   2    3.57    0.14
   2   8   2    3.65    0.13
  -3   8   2    0.33    0.09
  -3   8   2    0.16    0.06
  -3  -8  -2    0.21    0.04
   3   8  -2    0.25    0.07
  -3   8  -2    0.23    0.07
   3   8   2    0.26    0.05
   3   8   2    0.20    0.06
  -3  -8   2    0.27    0.05
  -3   8  -2    0.45    0.12
  -4  -8  -2    0.73    0.07
  -4   8   2    0.74    0.12
  -4   8   2    0.58    0.09
   4   8  -2    0.66    0.10
  -4   8  -2    0.75    0.14
  -4  -8   2    0.62    0.07
  -4   8  -2    0.54    0.09
   4   8   2    0.69    0.07
   4   8   2    0.91    0.11
  -5  -8  -2    1.11    0.10
  -5   8   2    0.92    0.13
  -5   8   2    0.93    0.11
  -5   8  -2    0.95    0.16
   5   8   2    0.98    0.09
  -5   8  -2    0.93    0.12
   5   8   2    1.17    0.13
  -5  -8   2    1.05    0.10
  -6   8   2    6.02    0.24
  -6  -8  -2    6.04    0.22
  -6   8   2    5.67    0.29
  -6  -8   2    5.47    0.21
  -6   8  -2    5.96    0.25
   6   8   2    5.83    0.25
  -6   8  -2    5.67    0.31
   6   8   2    5.90    0.21
  -7  -8  -2    3.69    0.17
  -7   8   2    3.86    0.19
  -7   8   2    3.78    0.24
  -7  -8   2    3.83    0.18
   7   8   2    3.71    0.17
  -7   8  -2    3.39    0.25
  -7   8  -2    3.78    0.19
  -8  -8  -2   -0.02    0.04
  -8   8   2   -0.05    0.08
  -8   8   2    0.02    0.05
   8   8   2    0.00    0.05
  -8   8  -2    0.04    0.09
  -8   8  -2   -0.06    0.09
  -8  -8   2   -0.06    0.04
  -9  -8  -2    0.05    0.05
  -9   8   2   -0.05    0.08
  -9   8   2   -0.04    0.05
  -9  -8   2    0.00    0.05
  -9   8  -2    0.04    0.09
 -10   8   2    3.18    0.24
 -10  -8  -2    3.32    0.19
 -10  -8   2    3.43    0.20
 -10   8  -2    3.84    0.29
 -11   8   2    0.79    0.16
 -11  -8  -2    0.74    0.11
 -11  -8   2    0.90    0.12
 -11   8  -2    0.85    0.18
 -12   8   2   -0.09    0.10
 -12  -8  -2    0.01    0.06
 -12  -8   2    0.08    0.07
 -12   8  -2    0.10    0.12
 -13   8   2    0.06    0.11
 -13  -8  -2    0.00    0.07
 -13  -8   2    0.16    0.09
 -13   8  -2   -0.04    0.11
   0  -9   2    0.02    0.03
   0   9  -2   -0.05    0.05
   0  -9  -2    0.00    0.03
   0   9   2    0.00    0.05
   1   9  -2    2.27    0.17
  -1  -9  -2    2.24    0.10
  -1   9   2    2.40    0.16
   1   9   2    2.02    0.15
   1  -9  -2    2.31    0.10
  -1  -9   2    2.09    0.11
  -1   9  -2    2.56    0.17
  -2   9   2    0.64    0.10
  -2   9   2    0.90    0.14
  -2  -9  -2    0.76    0.07
   2   9  -2    0.88    0.12
  -2   9  -2    0.89    0.12
   2   9   2    0.72    0.07
  -2  -9   2    0.99    0.09
  -2   9  -2    0.63    0.15
   2   9   2    0.87    0.11
  -3   9   2    2.79    0.17
   3   9  -2    2.55    0.18
  -3  -9  -2    2.88    0.12
  -3   9   2    2.74    0.21
  -3  -9   2    2.81    0.13
  -3   9  -2    2.30    0.16
   3   9   2    2.64    0.18
   3   9   2    2.64    0.12
  -3   9  -2    3.20    0.28
   4   9  -2    0.08    0.07
  -4   9   2   -0.02    0.05
  -4  -9  -2    0.01    0.03
  -4   9   2    0.00    0.08
   4   9   2    0.01    0.06
  -4   9  -2    0.13    0.11
  -4   9  -2    0.01    0.06
   4   9   2   -0.03    0.04
  -4  -9   2    0.04    0.04
  -5   9   2   13.34    0.48
  -5   9   2   12.76    0.41
  -5  -9  -2   13.78    0.37
  -5  -9   2   12.88    0.38
  -5   9  -2   12.69    0.52
  -5   9  -2   13.55    0.43
   5   9   2   12.96    0.36
   5   9   2   12.52    0.42
  -6  -9  -2    2.71    0.14
  -6   9   2    2.50    0.16
  -6   9   2    3.19    0.23
   6   9   2    2.80    0.18
  -6   9  -2    2.62    0.17
  -6   9  -2    2.52    0.25
   6   9   2    2.55    0.14
  -6  -9   2    2.62    0.15
  -7   9   2   10.08    0.36
  -7   9   2    9.93    0.42
  -7  -9  -2   10.28    0.33
  -7   9  -2   10.95    0.37
  -7  -9   2   10.28    0.34
  -7   9  -2   10.54    0.46
   7   9   2   10.67    0.33
  -8   9   2    0.65    0.11
  -8   9   2    0.71    0.15
  -8  -9  -2    0.72    0.10
  -8   9  -2    0.90    0.17
  -8   9  -2    0.73    0.12
  -8  -9   2    0.87    0.11
  -9  -9  -2    1.98    0.14
  -9   9   2    1.70    0.16
  -9   9   2    2.20    0.28
  -9   9  -2    2.24    0.27
  -9  -9   2    1.85    0.15
 -10  -9  -2    0.29    0.08
 -10  -9   2    0.13    0.07
 -10   9  -2    0.38    0.14
 -11  -9  -2    3.10    0.20
 -11  -9   2    3.14    0.20
 -11   9  -2    2.99    0.32
 -12  -9  -2    3.55    0.22
 -12   9  -2    3.57    0.36
 -12  -9   2    3.03    0.21
 -13  -9  -2    4.16    0.25
   0  10   2    6.34    0.27
   0  10  -2    6.23    0.29
   0 -10   2    5.98    0.21
   1 -10   2    0.01    0.04
   1  10  -2    0.02    0.07
  -1  10   2    0.05    0.06
  -1  10  -2   -0.10    0.06
   1  10   2   -0.05    0.06
  -1 -10   2    0.10    0.04
  -2  10   2    0.23    0.08
   2  10  -2    0.14    0.08
  -2  10  -2    0.12    0.08
  -2  10  -2    0.25    0.13
  -2 -10   2    0.16    0.05
   2  10   2    0.24    0.08
  -3  10   2    0.12    0.07
   3  10  -2    0.19    0.08
  -3 -10  -2    0.11    0.05
   3  10   2    0.07    0.07
  -3  10  -2    0.21    0.08
  -3 -10   2    0.12    0.04
  -3  10  -2    0.20    0.12
  -4 -10  -2    3.68    0.16
   4  10  -2    3.53    0.22
  -4  10   2    3.95    0.21
  -4  10  -2    4.26    0.31
   4  10   2    3.62    0.21
  -4  10  -2    4.04    0.22
  -4 -10   2    3.53    0.16
  -5 -10  -2   12.13    0.35
  -5  10   2   11.72    0.41
  -5 -10   2   12.37    0.36
  -5  10  -2   11.67    0.42
  -5  10  -2   10.71    0.49
   5  10   2   11.90    0.42
  -6  10   2    1.06    0.14
  -6 -10  -2    1.24    0.11
  -6  10  -2    1.23    0.21
   6  10   2    1.34    0.11
  -6 -10   2    1.12    0.11
   6  10   2    1.44    0.16
  -6  10  -2    1.19    0.14
  -7  10   2    0.06    0.07
  -7 -10  -2    0.02    0.05
  -7  10  -2    0.11    0.08
  -7  10  -2   -0.05    0.11
   7  10   2    0.14    0.06
  -7 -10   2    0.10    0.06
  -8 -10  -2    0.59    0.09
  -8  10   2    0.62    0.12
  -8 -10   2    0.76    0.11
  -8  10  -2    0.70    0.16
  -8  10  -2    0.44    0.16
  -9  10   2    1.41    0.16
  -9 -10  -2    1.58    0.15
  -9 -10   2    1.91    0.15
  -9  10  -2    1.79    0.25
 -10 -10  -2    1.76    0.16
 -10 -10   2    1.88    0.17
 -10  10  -2    1.67    0.24
 -11 -10  -2    0.65    0.11
 -11 -10   2    0.63    0.12
 -11  10  -2    0.60    0.18
 -12 -10  -2    3.18    0.36
 -12  10  -2    2.84    0.33
 -12 -10   2    2.99    0.21
   0  11   2    0.01    0.07
   0  11  -2    0.03    0.07
   0 -11   2    0.00    0.04
   1 -11   2    0.39    0.06
   1  11  -2    0.41    0.11
  -1  11   2    0.20    0.08
  -1 -11   2    0.47    0.07
   1  11   2    0.42    0.10
  -1  11  -2    0.43    0.10
  -2  11   2    1.77    0.18
   2  11  -2    1.96    0.20
  -2 -11   2    1.81    0.11
   2  11   2    1.63    0.17
  -2  11  -2    1.99    0.20
   3  11  -2    3.97    0.25
  -3  11   2    4.56    0.24
  -3 -11   2    4.29    0.18
   3  11   2    3.70    0.23
  -3  11  -2    4.74    0.33
  -3  11  -2    4.62    0.25
   4  11  -2    0.67    0.13
  -4  11   2    0.50    0.11
  -4 -11   2    0.56    0.08
  -4  11  -2    0.60    0.13
   4  11   2    0.70    0.13
  -4  11  -2    0.49    0.16
  -5  11   2    1.38    0.16
  -5 -11   2    1.33    0.12
  -5  11  -2    1.59    0.18
  -5  11  -2    1.52    0.23
   5  11   2    1.68    0.18
  -6  11   2    2.72    0.20
  -6  11  -2    2.74    0.21
   6  11   2    2.92    0.21
  -6  11  -2    2.88    0.31
  -6 -11   2    3.00    0.16
  -7  11   2    0.26    0.09
  -7  11  -2    0.56    0.12
  -7 -11   2    0.46    0.09
  -7  11  -2    0.33    0.15
  -8  11   2    1.26    0.15
  -8  11  -2    1.32    0.23
  -8  11  -2    0.86    0.21
  -8 -11   2    1.18    0.13
  -9  11   2   -0.04    0.08
  -9 -11   2   -0.01    0.05
  -9  11  -2   -0.03    0.11
 -10 -11   2    0.46    0.10
 -10  11  -2    0.68    0.19
 -11 -11   2   -0.05    0.07
 -11  11  -2    0.09    0.15
   0  12   2    0.54    0.13
   0  12  -2    0.65    0.14
   0 -12   2    0.59    0.08
  -1  12   2    0.34    0.10
   1 -12   2    0.24    0.06
   1  12  -2    0.21    0.10
  -1 -12   2    0.23    0.06
  -1  12  -2    0.21    0.10
   1  12   2    0.33    0.11
   2 -12   2    5.13    0.20
   2  12  -2    4.89    0.28
  -2  12   2    5.26    0.28
  -2  12  -2    5.36    0.29
   2  12   2    5.36    0.29
  -2 -12   2    5.19    0.20
   3  12  -2   20.97    0.67
  -3  12   2   20.78    0.64
  -3  12  -2   20.93    0.77
   3  12   2   20.51    0.65
  -3  12  -2   19.43    0.65
  -3 -12   2   20.86    0.55
  -4  12   2    0.49    0.11
   4  12  -2    0.61    0.13
   4  12   2    0.73    0.13
  -4 -12   2    0.60    0.09
  -4  12  -2    0.54    0.13
  -4  12  -2    0.82    0.19
  -5  12   2   11.98    0.45
  -5  12  -2   11.97    0.46
  -5  12  -2   11.42    0.56
  -5 -12   2   11.40    0.37
   5  12   2   11.70    0.46
  -6  12   2    0.32    0.11
  -6  12  -2    0.15    0.10
   6  12   2    0.19    0.10
  -6  12  -2    0.05    0.14
  -6 -12   2    0.28    0.07
  -7  12   2    0.16    0.09
  -7  12  -2    0.00    0.09
  -7 -12   2    0.10    0.07
  -8  12   2    0.15    0.09
  -8 -12   2    0.19    0.08
  -9  12   2    1.55    0.19
  -9 -12   2    1.69    0.17
 -10 -12   2    0.10    0.08
   0  13   2   -0.01    0.08
   0  13  -2   -0.02    0.08
  -1  13   2    0.06    0.09
   1  13  -2    0.02    0.09
  -1  13  -2    0.12    0.10
   1  13   2    0.01    0.10
   2  13  -2    4.36    0.29
  -2  13   2    4.03    0.27
  -2  13  -2    4.52    0.28
   2  13   2    4.62    0.29
  -3  13   2    0.56    0.14
   3  13  -2    0.59    0.15
   3  13   2    0.67    0.14
  -3  13  -2    0.63    0.15
   4  13  -2    0.48    0.13
  -4  13   2    0.33    0.11
   4  13   2    0.32    0.12
  -4  13  -2    0.27    0.11
  -5  13   2    6.26    0.33
  -5  13  -2    5.61    0.33
   5  13   2    6.35    0.34
  -6  13   2    0.20    0.10
  -6  13  -2    0.14    0.11
   6  13   2    0.18    0.10
  -7  13   2    0.62    0.14
  -7  13  -2    0.70    0.15
  -8  13   2    0.58    0.14
   0  14  -2    0.16    0.10
   0  14   2    0.03    0.09
   1  14  -2    8.54    0.41
  -1  14   2    7.91    0.40
  -1  14  -2    8.29    0.41
   1  14   2    8.07    0.40
   2  14  -2    5.09    0.32
  -2  14   2    5.02    0.31
  -2  14  -2    5.24    0.33
   2  14   2    5.27    0.32
   3  14  -2    0.05    0.09
  -3  14   2    0.05    0.10
   3  14   2    0.01    0.10
  -3  14  -2    0.18    0.10
   4  14  -2    4.59    0.31
  -4  14   2    4.84    0.30
  -4  14  -2    4.20    0.29
   4  14   2    4.45    0.30
  -5  14   2    0.27    0.12
  -5  14  -2    0.27    0.13
   5  14   2    0.18    0.11
  -6  14   2    0.15    0.11
  -6  14  -2    0.09    0.10
   6  14   2    0.24    0.11
  -7  14   2   -0.12    0.08
  -7  14  -2    0.05    0.09
   0  15  -2   -0.11    0.08
   0  15   2    0.00    0.11
   1  15  -2    0.07    0.11
  -1  15   2   -0.03    0.10
  -1  15  -2   -0.07    0.09
   1  15   2   -0.02    0.11
  -2  15   2    1.23    0.20
   2  15  -2    1.31    0.20
  -2  15  -2    1.28    0.20
   2  15   2    1.55    0.21
   3  15  -2    0.16    0.11
  -3  15   2   -0.07    0.16
   3  15   2    0.05    0.10
  -3  15  -2    0.16    0.12
   4  15   2    0.02    0.11
   5  15   2    2.18    0.26
   0   0  -3   -0.20    0.03
  -1   0   3   -0.10    0.01
  -1   0  -3   -0.06    0.03
   2   0   3   -0.04    0.01
  -2   0  -3   -0.04    0.03
  -2   0   3   -0.04    0.02
  -3   0  -3    0.00    0.02
  -3   0   3    0.00    0.02
   3   0   3   -0.02    0.01
   4   0   3    0.02    0.02
  -4   0   3   -0.04    0.02
  -4   0  -3    0.02    0.03
  -4   0   3   -0.03    0.02
  -5   0   3   -0.03    0.02
   5   0   3    0.04    0.03
  -5   0   3    0.02    0.02
  -5   0  -3    0.04    0.03
  -6   0   3    0.00    0.02
   6   0   3    0.02    0.03
  -6   0  -3    0.07    0.04
  -6   0   3   -0.01    0.03
  -7   0   3    0.00    0.03
  -7   0   3    0.02    0.03
   7   0   3    0.02    0.03
  -7   0  -3    0.02    0.04
  -8   0   3   -0.03    0.03
  -8   0   3    0.00    0.03
  -8   0  -3   -0.01    0.04
  -9   0  -3    0.05    0.05
  -9   0   3    0.00    0.04
 -10   0   3   -0.05    0.04
 -10   0  -3    0.00    0.05
 -11   0  -3   -0.02    0.06
 -11   0   3   -0.02    0.05
 -12   0   3   -0.01    0.06
 -12   0  -3    0.01    0.06
 -13   0   3    0.05    0.06
 -13   0  -3    0.07    0.08
 -14   0   3   -0.12    0.06
 -14   0  -3   -0.04    0.08
 -15   0   3    0.11    0.09
 -15   0  -3    0.06    0.10
   0   1  -3   -0.43    0.04
   0   1   3   -0.40    0.02
  -1  -1  -3   32.53    0.69
  -1   1   3   33.36    0.69
  -1   1  -3   32.41    0.74
   1   1   3   33.50    0.69
  -1  -1   3   33.28    0.70
  -2   1   3   24.61    0.55
   2  -1   3   25.12    0.54
  -2  -1  -3   24.73    0.55
  -2   1   3   25.44    0.54
  -2  -1   3   25.81    0.55
  -2   1  -3   25.39    0.58
   2   1   3   25.65    0.53
   2   1   3   24.47    0.54
  -3   1   3   11.53    0.28
  -3   1   3   11.80    0.27
  -3  -1  -3   11.19    0.28
   3  -1   3   11.47    0.26
  -3  -1   3   11.22    0.27
  -3   1  -3   11.11    0.30
  -3   1  -3   11.31    0.26
   3   1   3   11.61    0.27
   4  -1   3   58.77    1.23
  -4  -1  -3   58.24    1.26
  -4   1   3   59.13    1.25
  -4   1   3   57.31    1.24
  -4  -1   3   58.92    1.25
   4   1   3   58.84    1.24
  -4   1  -3   58.93    1.21
  -4   1  -3   56.51    1.27
   5  -1   3   30.34    0.67
  -5   1   3   30.63    0.69
  -5  -1  -3   28.98    0.69
  -5   1   3   29.84    0.67
  -5  -1   3   29.91    0.69
   5   1   3   30.30    0.68
  -5   1  -3   30.70    0.71
  -5   1  -3   30.04    0.64
  -6  -1  -3   17.24    0.44
  -6   1   3   16.88    0.43
  -6   1   3   16.51    0.40
   6  -1   3   17.04    0.41
   6   1   3   17.30    0.42
  -6   1  -3   15.79    0.44
  -6   1  -3   16.49    0.36
  -6  -1   3   16.18    0.42
  -7   1   3    0.43    0.05
  -7  -1  -3    0.46    0.07
  -7   1   3    0.48    0.07
  -7  -1   3    0.35    0.06
  -7   1  -3    0.52    0.08
   7   1   3    0.50    0.06
  -8   1   3    1.41    0.08
  -8  -1  -3    1.39    0.12
  -8   1   3    1.51    0.11
  -8  -1   3    1.20    0.09
  -8  -1   3    1.33    0.08
  -8   1  -3    1.42    0.11
  -9   1   3   27.46    0.65
  -9   1   3   27.47    0.70
  -9   1  -3   28.48    0.73
  -9  -1   3   27.79    0.70
 -10  -1  -3    0.76    0.11
 -10   1   3    1.00    0.12
 -10   1  -3    0.96    0.12
 -10  -1   3    0.82    0.11
 -11   1   3   32.31    0.82
 -11  -1  -3   30.32    0.82
 -11   1  -3   30.62    0.84
 -11  -1   3   31.67    0.81
 -12   1   3    0.58    0.11
 -12  -1  -3    0.62    0.11
 -12   1  -3    0.45    0.10
 -12  -1   3    0.57    0.10
 -13   1   3    1.44    0.17
 -13  -1  -3    1.73    0.19
 -13  -1   3    1.45    0.16
 -13   1  -3    1.65    0.19
 -14   1   3   -0.01    0.07
 -14  -1  -3    0.02    0.08
 -14  -1   3    0.03    0.07
 -14   1  -3    0.08    0.08
 -15  -1  -3    2.29    0.24
 -15   1   3    2.25    0.23
 -15  -1   3    2.46    0.23
 -15   1  -3    2.73    0.30
   0   2  -3   23.57    0.59
   0   2   3   24.45    0.53
  -1   2   3   22.35    0.47
  -1   2   3   22.60    0.49
  -1  -2  -3   22.58    0.47
   1   2   3   21.99    0.48
  -1   2  -3   21.23    0.50
   1   2   3   22.25    0.48
  -1   2  -3   21.37    0.54
  -1  -2   3   22.33    0.48
  -2   2   3    2.07    0.08
  -2   2   3    2.06    0.07
   2  -2   3    2.03    0.06
  -2  -2  -3    1.93    0.07
  -2   2  -3    2.08    0.08
  -2  -2   3    2.03    0.07
   2   2   3    1.83    0.07
   2   2   3    2.28    0.07
  -2   2  -3    2.07    0.11
  -3   2   3   15.52    0.37
  -3  -2  -3   15.89    0.37
   3  -2   3   16.19    0.35
  -3   2   3   15.67    0.37
  -3  -2   3   16.34    0.37
  -3   2  -3   15.83    0.41
   3   2   3   16.06    0.36
  -3   2  -3   16.16    0.37
   3   2   3   15.43    0.37
  -4  -2  -3    5.74    0.18
  -4   2   3    6.02    0.18
  -4   2   3    6.07    0.17
   4  -2   3    6.27    0.16
  -4   2  -3    6.52    0.17
  -4  -2   3    6.05    0.18
   4   2   3    6.08    0.16
   4   2   3    6.16    0.18
  -5  -2  -3   49.41    1.11
  -5   2   3   50.00    1.11
  -5   2   3   50.12    1.09
  -5  -2   3   52.02    1.11
  -5   2  -3   49.63    1.14
  -5   2  -3   51.62    1.07
   5   2   3   50.49    1.10
  -6   2   3    0.22    0.05
  -6   2   3    0.18    0.04
  -6  -2  -3    0.17    0.05
  -6   2  -3    0.20    0.03
  -6  -2   3    0.16    0.04
  -6   2  -3    0.19    0.06
   6   2   3    0.20    0.04
  -7  -2  -3    9.16    0.28
  -7   2   3    9.21    0.28
  -7   2   3    8.91    0.25
   7   2   3    8.84    0.27
  -7   2  -3    8.89    0.31
  -7  -2   3    8.89    0.28
  -8   2   3    7.75    0.23
  -8   2   3    8.28    0.27
  -8  -2  -3    7.76    0.27
  -8  -2   3    8.39    0.27
  -8   2  -3    8.16    0.30
   8   2   3    7.89    0.26
  -9   2   3    0.05    0.05
  -9   2   3    0.05    0.03
  -9  -2  -3   -0.04    0.04
  -9   2  -3    0.07    0.06
  -9  -2   3    0.07    0.05
 -10   2   3    8.29    0.31
 -10  -2  -3    8.93    0.32
 -10  -2   3    8.18    0.31
 -10   2  -3    9.34    0.35
 -11  -2  -3    9.21    0.35
 -11   2   3    9.85    0.36
 -11   2  -3    9.80    0.38
 -11  -2   3    9.44    0.34
 -12  -2  -3    0.74    0.12
 -12   2   3    0.82    0.12
 -12  -2   3    1.02    0.14
 -12   2  -3    0.94    0.15
 -13  -2  -3    0.50    0.12
 -13   2   3    0.25    0.09
 -13  -2   3    0.20    0.09
 -13   2  -3    0.33    0.11
 -14  -2  -3    0.10    0.09
 -14   2   3    0.01    0.08
 -14  -2   3   -0.02    0.07
 -14   2  -3    0.15    0.11
 -15   2   3    0.01    0.08
 -15  -2  -3   -0.07    0.08
 -15   2  -3   -0.01    0.17
 -15  -2   3    0.02    0.13
   0   3  -3   -0.03    0.05
   0   3  -3   -0.02    0.03
   0  -3  -3    0.00    0.01
   0   3   3    0.00    0.02
  -1   3   3   35.31    0.75
  -1   3   3   34.54    0.76
  -1  -3  -3   35.51    0.73
  -1  -3   3   34.50    0.75
   1   3   3   34.84    0.74
  -1   3  -3   34.10    0.78
  -1   3  -3   34.42    0.83
   1   3   3   35.07    0.75
  -2   3   3    4.21    0.13
   2  -3   3    4.31    0.10
  -2   3   3    4.20    0.13
  -2  -3  -3    4.42    0.12
   2   3   3    4.38    0.13
   2   3   3    4.54    0.13
  -2  -3   3    4.28    0.13
  -2   3  -3    4.32    0.14
  -3   3   3   18.28    0.43
  -3  -3  -3   19.12    0.43
  -3   3   3   18.71    0.43
   3   3   3   18.65    0.43
  -3   3  -3   18.55    0.49
  -3  -3   3   18.22    0.43
   3   3   3   18.38    0.43
  -3   3  -3   18.45    0.44
  -4   3   3    3.17    0.11
  -4   3   3    3.39    0.12
  -4  -3  -3    3.42    0.12
   4   3   3    3.24    0.12
   4   3   3    3.13    0.11
  -4   3  -3    3.08    0.12
  -4  -3   3    3.12    0.12
  -4   3  -3    3.02    0.15
  -5  -3  -3   16.79    0.42
  -5   3   3   16.94    0.43
  -5   3   3   17.14    0.41
   5   3   3   17.36    0.40
  -5   3  -3   17.00    0.47
   5   3   3   17.14    0.42
  -5  -3   3   16.49    0.42
  -5   3  -3   16.96    0.40
  -6   3   3    1.68    0.09
  -6  -3  -3    1.58    0.09
  -6   3   3    1.59    0.10
  -6   3  -3    1.51    0.08
  -6  -3   3    1.57    0.09
  -6   3  -3    1.76    0.12
  -7  -3  -3    0.05    0.04
  -7   3   3    0.09    0.05
  -7   3   3    0.12    0.03
  -7  -3   3    0.15    0.05
  -7   3  -3    0.15    0.07
   7   3   3    0.03    0.04
  -7   3  -3    0.09    0.03
  -8   3   3    0.00    0.03
  -8   3   3    0.04    0.05
  -8  -3  -3   -0.05    0.04
   8   3   3    0.03    0.04
  -8  -3   3    0.02    0.04
  -8   3  -3    0.06    0.06
  -9   3   3    6.02    0.20
  -9   3   3    6.17    0.25
  -9  -3  -3    6.09    0.24
  -9  -3   3    6.31    0.25
  -9   3  -3    6.58    0.28
 -10  -3  -3    0.11    0.06
 -10   3   3    0.06    0.06
 -10  -3   3    0.16    0.07
 -10   3  -3    0.20    0.09
 -11  -3  -3    1.40    0.15
 -11   3   3    1.01    0.13
 -11  -3   3    1.48    0.14
 -11   3  -3    1.21    0.17
 -12   3   3   -0.01    0.07
 -12  -3  -3   -0.06    0.05
 -12   3  -3    0.07    0.09
 -12  -3   3    0.00    0.06
 -13   3   3    0.14    0.09
 -13  -3  -3    0.16    0.08
 -13  -3   3    0.12    0.08
 -13   3  -3    0.29    0.12
 -14  -3  -3    0.81    0.14
 -14   3   3    0.78    0.14
 -14   3  -3    0.85    0.17
 -14  -3   3    0.69    0.13
 -15   3   3    3.35    0.25
   0   4   3   27.94    0.62
   0   4  -3   26.88    0.65
   0   4  -3   27.76    0.72
   0  -4  -3   27.98    0.58
  -1   4   3    6.38    0.18
  -1  -4  -3    6.20    0.15
  -1   4   3    6.36    0.19
   1   4  -3    5.83    0.20
  -1  -4   3    6.59    0.17
  -1   4  -3    6.47    0.25
   1   4   3    6.29    0.17
  -1   4  -3    6.28    0.20
   1   4   3    6.04    0.18
  -2   4   3   -0.02    0.03
  -2   4   3    0.01    0.02
  -2  -4  -3    0.02    0.02
  -2   4  -3   -0.02    0.04
  -2   4  -3    0.03    0.03
   2   4   3    0.00    0.02
   2   4   3   -0.02    0.02
  -2  -4   3   -0.02    0.02
  -3   4   3    3.39    0.13
  -3  -4  -3    3.26    0.11
  -3   4   3    3.44    0.12
   3   4   3    3.53    0.13
  -3   4  -3    3.45    0.14
  -3   4  -3    3.56    0.18
   3   4   3    3.02    0.11
  -3  -4   3    3.45    0.12
  -4  -4  -3    0.28    0.04
  -4   4   3    0.30    0.05
  -4   4   3    0.35    0.05
  -4   4  -3    0.24    0.07
  -4  -4   3    0.37    0.05
   4   4   3    0.28    0.04
  -4   4  -3    0.23    0.05
   4   4   3    0.36    0.05
  -5   4   3    0.02    0.04
  -5  -4  -3    0.06    0.03
  -5   4   3    0.06    0.03
   5   4   3    0.01    0.03
  -5   4  -3    0.07    0.03
   5   4   3    0.01    0.03
  -5   4  -3    0.02    0.05
  -5  -4   3    0.01    0.03
  -6  -4  -3    2.72    0.12
  -6   4   3    2.65    0.12
  -6   4   3    2.66    0.14
  -6   4  -3    2.54    0.11
  -6   4  -3    2.37    0.16
   6   4   3    2.44    0.12
  -6  -4   3    2.44    0.12
  -7  -4  -3    5.04    0.19
  -7   4   3    4.86    0.17
  -7   4   3    4.81    0.20
   7   4   3    5.06    0.18
  -7   4  -3    5.06    0.24
  -7  -4   3    4.81    0.19
  -7   4  -3    4.71    0.17
  -8  -4  -3    0.36    0.07
  -8   4   3    0.30    0.07
  -8   4   3    0.38    0.06
   8   4   3    0.49    0.07
  -8  -4   3    0.37    0.07
  -8   4  -3    0.51    0.10
  -9   4   3   23.14    0.57
  -9  -4  -3   24.07    0.63
  -9   4   3   23.54    0.64
   9   4   3   23.99    0.61
  -9   4  -3   23.44    0.69
  -9  -4   3   23.73    0.62
 -10   4   3    4.28    0.22
 -10  -4  -3    3.97    0.20
 -10  -4   3    3.39    0.19
 -10   4  -3    4.21    0.25
 -11  -4  -3    1.41    0.14
 -11   4   3    1.50    0.16
 -11   4  -3    1.06    0.16
 -11  -4   3    1.51    0.15
 -12  -4  -3   -0.07    0.06
 -12   4   3    0.04    0.08
 -12  -4   3    0.03    0.06
 -12   4  -3   -0.03    0.09
 -13   4   3    1.39    0.18
 -13  -4  -3    1.08    0.15
 -13   4  -3    1.18    0.18
 -13  -4   3    1.57    0.17
 -14  -4  -3    2.06    0.21
 -14   4   3    1.82    0.21
 -14  -4   3    2.03    0.20
 -14   4  -3    1.86    0.23
 -15   4   3    0.06    0.12
   0   5  -3   -0.03    0.07
   0  -5  -3    0.00    0.01
   0   5  -3   -0.01    0.04
   0   5   3   -0.04    0.03
  -1   5   3    6.36    0.22
   1   5  -3    6.60    0.23
  -1   5   3    6.52    0.20
  -1  -5  -3    6.44    0.16
  -1   5  -3    6.66    0.28
   1   5   3    6.62    0.20
  -1   5  -3    6.57    0.22
  -1  -5   3    6.48    0.18
   1   5   3    6.43    0.17
  -2   5   3    6.91    0.23
   2   5  -3    7.05    0.24
  -2  -5  -3    7.02    0.18
  -2   5   3    7.08    0.21
  -2   5  -3    6.95    0.23
   2   5   3    7.03    0.22
  -2   5  -3    6.69    0.28
   2   5   3    6.77    0.19
  -2  -5   3    7.01    0.20
  -3  -5  -3   20.35    0.46
  -3   5   3   19.74    0.50
  -3   5   3   19.96    0.49
  -3   5  -3   20.04    0.50
  -3  -5   3   20.29    0.47
   3   5   3   19.65    0.49
  -3   5  -3   19.73    0.57
   3   5   3   19.80    0.47
  -4   5   3   17.39    0.46
  -4   5   3   17.59    0.44
  -4  -5  -3   17.38    0.42
   4   5   3   17.20    0.42
   4   5   3   17.44    0.44
  -4   5  -3   17.76    0.52
  -4   5  -3   17.30    0.45
  -4  -5   3   17.33    0.43
  -5   5   3    4.25    0.18
  -5  -5  -3    4.45    0.16
  -5   5   3    4.69    0.17
   5   5   3    4.45    0.16
  -5   5  -3    5.09    0.24
  -5  -5   3    4.70    0.17
  -5   5  -3    4.59    0.17
   5   5   3    4.78    0.17
  -6   5   3    0.03    0.04
  -6  -5  -3    0.04    0.03
  -6   5   3    0.03    0.05
   6   5   3    0.09    0.04
  -6  -5   3    0.04    0.04
  -6   5  -3    0.06    0.04
   6   5   3    0.08    0.04
  -6   5  -3    0.01    0.06
  -7   5   3    2.33    0.15
  -7   5   3    2.88    0.13
  -7  -5  -3    2.80    0.14
  -7   5  -3    2.44    0.13
   7   5   3    2.74    0.13
  -7  -5   3    2.65    0.14
  -7   5  -3    2.77    0.19
  -8  -5  -3   20.18    0.53
  -8   5   3   20.04    0.56
  -8   5   3   19.50    0.50
   8   5   3   19.73    0.52
  -8   5  -3   19.94    0.61
  -8  -5   3   19.85    0.53
  -9   5   3   -0.02    0.04
  -9  -5  -3    0.02    0.05
  -9   5   3    0.07    0.07
  -9   5  -3    0.04    0.08
  -9  -5   3    0.05    0.05
   9   5   3    0.06    0.05
 -10  -5  -3   22.96    0.62
 -10   5   3   23.11    0.66
 -10   5  -3   21.92    0.70
 -10  -5   3   22.39    0.62
 -11  -5  -3    0.55    0.10
 -11   5   3    0.42    0.11
 -11   5  -3    0.41    0.12
 -11  -5   3    0.55    0.10
 -12  -5  -3    0.28    0.09
 -12   5   3    0.20    0.10
 -12  -5   3    0.13    0.07
 -12   5  -3    0.10    0.11
 -13  -5  -3    0.04    0.07
 -13   5   3    0.05    0.10
 -13  -5   3   -0.01    0.07
 -13   5  -3    0.19    0.12
 -14   5   3    0.79    0.16
 -14  -5  -3    0.64    0.13
 -14  -5   3    1.01    0.15
 -14   5  -3    0.84    0.19
   0   6   3   13.48    0.36
   0   6   3   13.51    0.32
   0  -6  -3   13.16    0.31
   0   6  -3   13.30    0.39
  -1  -6  -3    5.24    0.14
  -1   6   3    5.28    0.19
   1   6  -3    5.45    0.21
  -1   6   3    5.66    0.22
  -1   6  -3    5.11    0.27
   1   6   3    5.10    0.19
  -1  -6   3    4.99    0.16
  -1   6  -3    5.44    0.21
   1   6   3    5.36    0.15
  -2   6   3    4.26    0.19
  -2  -6  -3    4.17    0.13
  -2   6   3    4.56    0.17
   2   6  -3    4.13    0.19
   2   6   3    4.46    0.14
  -2   6  -3    3.89    0.23
  -2  -6   3    4.22    0.14
   2   6   3    4.13    0.17
  -2   6  -3    4.35    0.18
  -3  -6  -3    2.20    0.09
  -3   6   3    1.96    0.13
  -3   6   3    1.83    0.11
  -3  -6   3    2.03    0.10
  -3   6  -3    2.03    0.13
   3   6   3    2.09    0.09
   3   6   3    2.00    0.11
  -3   6  -3    1.83    0.18
  -4   6   3   15.87    0.42
  -4   6   3   15.85    0.45
  -4  -6  -3   15.55    0.39
  -4  -6   3   16.33    0.41
  -4   6  -3   15.69    0.43
   4   6   3   16.33    0.43
   4   6   3   15.98    0.40
  -4   6  -3   16.11    0.52
  -5  -6  -3    0.29    0.05
  -5   6   3    0.25    0.06
  -5   6   3    0.32    0.07
  -5  -6   3    0.24    0.05
   5   6   3    0.24    0.06
  -5   6  -3    0.41    0.10
   5   6   3    0.25    0.05
  -5   6  -3    0.32    0.06
  -6   6   3    0.08    0.06
  -6   6   3    0.08    0.04
  -6  -6  -3    0.13    0.04
   6   6   3    0.15    0.05
  -6  -6   3    0.12    0.04
  -6   6  -3    0.16    0.05
   6   6   3    0.10    0.04
  -6   6  -3    0.19    0.09
  -7   6   3    4.32    0.18
  -7   6   3    4.17    0.21
  -7  -6  -3    4.45    0.18
   7   6   3    4.40    0.18
  -7   6  -3    4.11    0.24
  -7  -6   3    4.26    0.18
  -7   6  -3    4.18    0.18
  -8   6   3    3.73    0.16
  -8  -6  -3    3.52    0.17
  -8   6   3    3.81    0.21
  -8  -6   3    3.54    0.18
   8   6   3    3.78    0.17
  -8   6  -3    3.70    0.24
  -9   6   3    5.69    0.27
  -9   6   3    5.19    0.21
  -9  -6  -3    5.37    0.23
  -9   6  -3    5.94    0.32
  -9  -6   3    5.29    0.23
   9   6   3    5.55    0.23
 -10   6   3    5.15    0.27
 -10  -6  -3    5.27    0.23
 -10   6  -3    4.47    0.29
 -10  -6   3    5.09    0.24
 -11   6   3    0.78    0.13
 -11  -6  -3    0.69    0.11
 -11  -6   3    0.70    0.11
 -11   6  -3    0.70    0.16
 -12   6   3    3.35    0.24
 -12  -6  -3    3.20    0.21
 -12  -6   3    3.21    0.20
 -12   6  -3    3.40    0.31
 -13  -6  -3    0.15    0.09
 -13   6   3    0.14    0.11
 -13   6  -3    0.28    0.15
 -13  -6   3    0.23    0.09
 -14   6   3    1.89    0.24
 -14  -6  -3    2.06    0.21
 -14   6  -3    2.18    0.29
   0   7  -3    0.03    0.05
   0  -7  -3    0.00    0.02
   0   7   3    0.05    0.02
   0  -7   3    0.00    0.02
   0   7   3    0.00    0.04
  -1   7   3    7.04    0.24
   1   7  -3    6.56    0.26
  -1  -7  -3    7.05    0.19
   1   7   3    6.72    0.24
  -1   7  -3    6.89    0.33
   1   7   3    6.98    0.19
  -1  -7   3    6.86    0.21
  -1   7  -3    7.19    0.26
  -2  -7  -3    1.98    0.08
   2   7  -3    2.13    0.14
  -2   7   3    1.91    0.12
  -2   7   3    2.16    0.15
   2   7   3    1.95    0.12
  -2   7  -3    1.96    0.13
  -2  -7   3    2.13    0.10
   2   7   3    2.07    0.09
  -2   7  -3    1.84    0.19
   3   7  -3   30.56    0.77
  -3  -7  -3   30.28    0.68
  -3   7   3   29.77    0.73
  -3   7   3   30.93    0.77
  -3  -7   3   29.69    0.70
   3   7   3   30.22    0.74
  -3   7  -3   28.95    0.75
   3   7   3   30.21    0.69
  -3   7  -3   30.26    0.85
  -4   7   3   11.69    0.38
  -4  -7  -3   11.39    0.31
  -4   7   3   11.23    0.34
   4   7   3   11.45    0.31
  -4   7  -3   11.32    0.43
   4   7   3   11.30    0.35
  -4  -7   3   11.96    0.32
  -4   7  -3   11.68    0.36
  -5   7   3    0.88    0.10
  -5  -7  -3    0.84    0.08
  -5   7   3    0.97    0.12
   5   7   3    0.65    0.07
  -5   7  -3    0.85    0.14
  -5   7  -3    0.83    0.10
   5   7   3    0.86    0.10
  -5  -7   3    0.80    0.08
  -6   7   3    1.11    0.13
  -6  -7  -3    1.14    0.09
  -6   7   3    1.14    0.11
   6   7   3    1.08    0.10
  -6   7  -3    0.64    0.13
  -6   7  -3    1.00    0.11
  -6  -7   3    1.07    0.10
   6   7   3    1.20    0.12
  -7   7   3   12.01    0.41
  -7   7   3   11.89    0.36
  -7  -7  -3   11.80    0.35
  -7   7  -3   11.59    0.37
  -7  -7   3   12.19    0.36
   7   7   3   11.73    0.35
  -7   7  -3   11.71    0.47
  -8  -7  -3    0.88    0.10
  -8   7   3    0.51    0.11
  -8   7   3    0.55    0.09
  -8  -7   3    0.58    0.09
   8   7   3    0.55    0.08
  -8   7  -3    0.58    0.14
  -9   7   3    4.04    0.24
  -9  -7  -3    3.62    0.19
  -9   7   3    3.79    0.19
  -9  -7   3    3.97    0.20
   9   7   3    3.46    0.18
  -9   7  -3    4.07    0.27
 -10  -7  -3    2.50    0.16
 -10   7   3    1.84    0.20
 -10  -7   3    1.95    0.15
 -10   7  -3    1.56    0.21
 -11   7   3    5.32    0.31
 -11  -7  -3    5.08    0.25
 -11   7  -3    5.69    0.35
 -11  -7   3    4.91    0.25
 -12  -7  -3    0.45    0.10
 -12   7   3    0.73    0.15
 -12  -7   3    0.66    0.12
 -12   7  -3    0.41    0.14
 -13   7   3    0.90    0.17
 -13  -7  -3    0.67    0.12
 -13  -7   3    0.96    0.15
 -13   7  -3    0.74    0.18
 -14   7   3    0.11    0.12
 -14  -7  -3    0.02    0.12
   0  -8   3   13.84    0.35
   0   8   3   13.58    0.40
   0   8   3   13.66    0.33
   0   8  -3   12.91    0.42
   0  -8  -3   13.59    0.33
  -1   8   3    0.04    0.02
   1   8  -3   -0.02    0.05
  -1   8   3    0.02    0.04
  -1  -8  -3    0.02    0.02
  -1  -8   3    0.10    0.04
   1   8   3   -0.02    0.04
  -1   8  -3    0.08    0.06
   1   8   3    0.01    0.03
  -1   8  -3   -0.09    0.08
   1  -8  -3    0.07    0.03
  -2  -8  -3    5.43    0.17
   2   8  -3    5.53    0.25
  -2   8   3    5.82    0.26
  -2   8   3    5.65    0.22
  -2  -8   3    5.14    0.18
  -2   8  -3    5.20    0.23
   2   8   3    5.27    0.17
   2   8   3    5.35    0.22
  -2   8  -3    4.48    0.28
  -3  -8  -3    0.30    0.05
   3   8  -3    0.41    0.09
  -3   8   3    0.38    0.10
  -3   8   3    0.39    0.08
   3   8   3    0.33    0.08
  -3   8  -3    0.36    0.08
  -3  -8   3    0.50    0.07
   3   8   3    0.41    0.05
  -3   8  -3    0.37    0.13
  -4   8   3    0.41    0.08
  -4   8   3    0.43    0.10
  -4  -8  -3    0.42    0.06
  -4  -8   3    0.40    0.06
  -4   8  -3    0.45    0.12
  -4   8  -3    0.49    0.09
   4   8   3    0.23    0.07
   4   8   3    0.55    0.07
  -5  -8  -3   10.17    0.30
  -5   8   3   10.32    0.38
  -5   8   3   10.53    0.34
  -5  -8   3   10.68    0.32
  -5   8  -3    9.86    0.43
  -5   8  -3   10.53    0.35
   5   8   3   10.39    0.30
   5   8   3   10.02    0.34
  -6  -8  -3   12.10    0.35
  -6   8   3   11.76    0.43
  -6   8   3   11.67    0.38
  -6   8  -3   12.78    0.50
   6   8   3   12.27    0.39
  -6   8  -3   12.36    0.39
  -6  -8   3   12.38    0.36
   6   8   3   12.14    0.35
  -7   8   3    3.05    0.21
  -7  -8  -3    2.93    0.15
  -7   8   3    2.91    0.17
  -7   8  -3    2.62    0.17
  -7  -8   3    2.83    0.15
  -7   8  -3    3.43    0.26
   7   8   3    3.11    0.16
  -8   8   3    8.55    0.31
  -8  -8  -3    9.26    0.31
  -8   8   3    8.54    0.37
  -8  -8   3    8.67    0.31
  -8   8  -3    8.81    0.42
   8   8   3    8.71    0.30
  -9  -8  -3    1.94    0.14
  -9   8   3    1.87    0.21
  -9   8   3    2.02    0.15
  -9   8  -3    2.29    0.26
   9   8   3    2.17    0.15
  -9  -8   3    1.95    0.17
 -10   8   3    0.05    0.09
 -10  -8  -3    0.18    0.07
 -10  -8   3    0.05    0.06
 -10   8  -3    0.28    0.13
 -11  -8  -3    1.41    0.15
 -11  -8   3    1.16    0.15
 -11   8  -3    1.23    0.21
 -12  -8  -3    2.45    0.19
 -12   8  -3    2.39    0.28
 -12  -8   3    2.38    0.18
 -13  -8  -3   -0.03    0.07
 -13  -8   3   -0.02    0.07
 -13   8  -3    0.16    0.13
   0   9  -3    0.00    0.05
   0   9   3    0.02    0.05
   0  -9   3    0.04    0.03
  -1  -9  -3    0.44    0.06
  -1   9   3    0.38    0.08
   1   9  -3    0.48    0.10
   1   9   3    0.33    0.07
   1   9   3    0.52    0.09
  -1   9  -3    0.50    0.10
  -1  -9   3    0.44    0.06
   2   9  -3   17.96    0.54
  -2  -9  -3   17.91    0.43
  -2   9   3   17.36    0.51
   2   9   3   17.02    0.43
  -2   9  -3   17.82    0.63
  -2   9  -3   17.59    0.54
  -2  -9   3   18.58    0.46
   2   9   3   18.86    0.53
  -3  -9  -3    0.46    0.06
  -3   9   3    0.52    0.09
   3   9  -3    0.51    0.10
   3   9   3    0.60    0.10
   3   9   3    0.57    0.07
  -3   9  -3    0.52    0.10
  -3   9  -3    0.61    0.15
  -3  -9   3    0.56    0.07
  -4   9   3   -0.03    0.05
  -4  -9  -3    0.00    0.04
  -4   9  -3   -0.10    0.09
   4   9   3    0.02    0.06
  -4   9  -3   -0.06    0.05
   4   9   3   -0.01    0.04
  -4  -9   3    0.08    0.04
  -5   9   3    9.27    0.34
  -5  -9  -3    9.88    0.29
  -5  -9   3    9.36    0.30
   5   9   3    9.49    0.29
  -5   9  -3    9.84    0.36
   5   9   3    9.08    0.34
  -5   9  -3    9.68    0.44
  -6  -9  -3    0.05    0.04
  -6   9   3    0.13    0.07
  -6   9  -3    0.14    0.07
   6   9   3    0.07    0.05
  -6   9  -3    0.07    0.11
  -6  -9   3    0.08    0.05
   6   9   3    0.06    0.07
  -7   9   3    1.75    0.16
  -7  -9  -3    1.48    0.11
  -7  -9   3    1.80    0.13
  -7   9  -3    1.43    0.20
  -7   9  -3    1.50    0.15
   7   9   3    1.63    0.12
  -8   9   3    0.57    0.11
  -8  -9  -3    0.42    0.08
  -8   9  -3    0.47    0.15
  -8  -9   3    0.38    0.08
   8   9   3    0.53    0.09
  -9  -9  -3   14.66    0.44
  -9   9   3   14.06    0.45
  -9  -9   3   13.71    0.44
  -9   9  -3   14.49    0.60
 -10  -9  -3    1.36    0.14
 -10   9  -3    1.15    0.21
 -10  -9   3    1.65    0.16
 -11  -9  -3    0.17    0.07
 -11   9  -3    0.24    0.15
 -11  -9   3    0.10    0.07
 -12  -9  -3   -0.02    0.06
 -12  -9   3    0.04    0.08
 -12   9  -3    0.20    0.15
 -13  -9  -3    1.31    0.17
   0 -10   3   23.20    0.58
   0  10  -3   24.67    0.69
   0  10   3   23.44    0.66
   1  10  -3    1.14    0.15
  -1  10   3    1.12    0.14
   1 -10   3    1.14    0.09
  -1 -10   3    1.15    0.10
  -1  10  -3    1.21    0.14
   1  10   3    1.33    0.14
   2  10  -3    0.12    0.08
  -2  10   3    0.16    0.07
  -2  10  -3    0.05    0.10
  -2 -10   3    0.20    0.05
  -2  10  -3    0.17    0.08
   2  10   3    0.10    0.07
  -3  10   3    8.97    0.34
   3  10  -3    9.39    0.37
  -3  10  -3    9.04    0.45
  -3 -10   3    8.98    0.28
  -3  10  -3    9.35    0.37
   3  10   3    9.22    0.35
  -4  10   3    1.44    0.15
  -4  10  -3    1.18    0.15
   4  10   3    1.29    0.15
  -4 -10   3    1.27    0.10
  -4  10  -3    0.90    0.18
  -5  10   3    4.84    0.24
  -5  10  -3    4.73    0.25
   5  10   3    5.11    0.26
   5  10   3    4.70    0.19
  -5  10  -3    5.08    0.34
  -5 -10   3    5.16    0.21
  -6  10   3    1.00    0.13
  -6  10  -3    0.83    0.18
   6  10   3    0.93    0.10
  -6  10  -3    0.98    0.13
  -6 -10   3    1.12    0.11
   6  10   3    1.01    0.14
  -7  10   3    0.91    0.13
  -7 -10   3    1.01    0.12
  -7  10  -3    1.03    0.19
  -7  10  -3    1.09    0.14
   7  10   3    1.01    0.11
  -8  10   3    0.51    0.11
  -8 -10   3    0.53    0.09
  -8  10  -3    0.73    0.19
   8  10   3    0.59    0.09
  -9  10   3    1.57    0.17
  -9 -10   3    1.63    0.16
  -9  10  -3    2.08    0.27
 -10 -10   3   -0.01    0.06
 -10  10  -3    0.07    0.13
 -11  10  -3    1.68    0.27
 -11 -10   3    1.35    0.16
 -12  10  -3    0.03    0.15
   0  11   3   -0.01    0.07
   0 -11   3   -0.02    0.04
   0  11  -3    0.03    0.08
   1 -11   3    1.13    0.10
   1  11  -3    1.51    0.18
  -1  11   3    1.26    0.15
  -1 -11   3    1.52    0.11
   1  11   3    1.24    0.15
  -1  11  -3    1.28    0.17
   2  11  -3    0.29    0.10
  -2  11   3    0.43    0.10
   2  11   3    0.35    0.10
  -2  11  -3    0.38    0.10
  -2 -11   3    0.37    0.07
  -3  11   3    5.11    0.27
   3  11  -3    5.23    0.28
   3  11   3    5.19    0.27
  -3 -11   3    4.80    0.20
  -3  11  -3    5.21    0.36
  -3  11  -3    5.22    0.28
  -4  11   3    0.22    0.08
  -4  11  -3    0.28    0.10
  -4  11  -3    0.11    0.14
  -4 -11   3    0.28    0.06
   4  11   3    0.29    0.10
  -5  11   3    9.67    0.38
  -5 -11   3    9.77    0.32
   5  11   3    9.70    0.39
  -5  11  -3   10.32    0.51
  -5  11  -3    9.75    0.39
  -6  11   3    5.99    0.29
   6  11   3    5.63    0.29
  -6  11  -3    6.37    0.41
  -6 -11   3    5.95    0.24
  -6  11  -3    5.92    0.30
  -7  11   3    1.50    0.16
  -7  11  -3    1.86    0.18
  -7  11  -3    1.27    0.22
  -7 -11   3    1.63    0.15
  -8  11   3    0.50    0.11
  -8 -11   3    0.55    0.10
  -8  11  -3    0.59    0.18
  -9  11   3    1.08    0.15
  -9  11  -3    1.51    0.26
  -9 -11   3    1.17    0.14
 -10  11  -3    2.72    0.33
 -10 -11   3    2.84    0.20
 -11 -11   3    0.21    0.09
 -11  11  -3    0.24    0.17
   0  12   3    1.98    0.20
   0  12  -3    1.71    0.19
   0 -12   3    1.90    0.12
   1 -12   3    9.47    0.30
  -1  12   3    8.69    0.37
   1  12  -3    9.29    0.41
   1  12   3    9.28    0.39
  -1  12  -3    8.49    0.38
  -1 -12   3    9.02    0.29
   2  12  -3    1.87    0.22
   2 -12   3    1.77    0.12
  -2  12   3    1.81    0.19
  -2  12  -3    1.54    0.19
  -2 -12   3    1.57    0.12
   2  12   3    1.62    0.18
   3  12  -3    0.71    0.14
  -3  12   3    0.80    0.14
  -3  12  -3    0.72    0.15
  -3  12  -3    0.67    0.19
  -3 -12   3    0.74    0.09
   3  12   3    0.68    0.14
  -4  12   3    0.75    0.13
   4  12   3    0.86    0.14
  -4  12  -3    0.59    0.13
  -4 -12   3    0.72    0.09
  -4  12  -3    0.64    0.18
  -5  12   3    0.49    0.11
   5  12   3    0.31    0.11
  -5  12  -3    0.48    0.19
  -5 -12   3    0.57    0.09
  -5  12  -3    0.45    0.13
  -6  12   3    0.45    0.12
   6  12   3    0.35    0.11
  -6  12  -3    0.23    0.16
  -6 -12   3    0.36    0.08
  -6  12  -3    0.35    0.11
  -7  12   3    0.58    0.12
  -7  12  -3    0.57    0.19
  -7 -12   3    0.62    0.10
  -7  12  -3    0.76    0.14
  -8  12   3    0.41    0.11
  -8  12  -3    0.71    0.21
  -8 -12   3    0.30    0.08
  -9  12   3    1.00    0.16
  -9  12  -3    0.85    0.22
  -9 -12   3    0.92    0.13
 -10 -12   3    2.14    0.20
   0  13   3    0.03    0.09
   0 -13   3   -0.01    0.05
   0  13  -3    0.24    0.10
  -1  13   3    1.18    0.17
   1 -13   3    0.78    0.09
   1  13  -3    0.98    0.17
  -1 -13   3    0.95    0.11
   1  13   3    0.96    0.16
  -1  13  -3    0.94    0.17
   2  13  -3    7.88    0.38
  -2  13   3    8.09    0.36
   2 -13   3    7.11    0.27
  -2 -13   3    7.66    0.27
   2  13   3    7.37    0.36
  -2  13  -3    8.29    0.39
   3  13  -3    2.70    0.26
  -3  13   3    2.42    0.23
   3 -13   3    2.29    0.22
  -3 -13   3    2.70    0.16
  -3  13  -3    2.42    0.25
   3  13   3    2.69    0.24
  -4  13   3    2.92    0.25
  -4  13  -3    3.36    0.26
  -4 -13   3    3.62    0.18
   4  13   3    3.09    0.24
  -5  13   3    0.48    0.13
   5  13   3    0.47    0.13
  -5  13  -3    0.46    0.13
  -5 -13   3    0.34    0.08
  -6  13   3   -0.02    0.08
  -6  13  -3    0.11    0.09
  -6 -13   3   -0.07    0.05
   6  13   3    0.00    0.08
  -7  13   3    0.01    0.08
  -7 -13   3   -0.06    0.05
  -7  13  -3   -0.01    0.09
  -8  13   3    1.17    0.17
  -8 -13   3    1.41    0.15
  -9  13   3    0.28    0.12
  -9 -13   3    0.29    0.10
   0  14  -3    6.15    0.35
   0  14   3    6.34    0.34
  -1  14   3    2.30    0.23
   1  14  -3    2.27    0.25
   1  14   3    2.22    0.24
  -1  14  -3    2.42    0.26
  -2  14   3    0.45    0.13
   2  14  -3    0.38    0.13
  -2  14  -3    0.25    0.13
   2  14   3    0.31    0.12
  -3  14   3    0.70    0.15
   3  14  -3    1.00    0.17
   3  14   3    1.07    0.18
  -3  14  -3    0.78    0.16
  -4  14   3   -0.01    0.09
   4  14   3    0.24    0.12
  -4  14  -3    0.03    0.09
  -5  14   3    2.87    0.27
  -5  14  -3    2.45    0.26
   5  14   3    2.61    0.25
  -6  14   3    0.11    0.11
  -6  14  -3    0.12    0.11
  -7  14  -3    0.26    0.11
   0  15   3   -0.13    0.10
   0  15  -3   -0.08    0.09
  -1  15   3    1.28    0.19
   1  15  -3    1.59    0.22
   1  15   3    1.48    0.21
  -1  15  -3    1.66    0.23
   2  15  -3    1.39    0.22
  -2  15   3    1.31    0.20
   2  15   3    1.34    0.20
  -2  15  -3    1.65    0.24
   3  15  -3    1.05    0.21
   3  15   3    0.94    0.18
  -3  15  -3    1.39    0.24
   4  15   3    1.68    0.22
   5  15   3    2.34    0.25
   0   0  -4  656.87   15.22
  -1   0   4  134.89    2.85
  -1   0  -4  138.31    2.89
  -2   0   4   11.23    0.26
   2   0   4   11.73    0.27
  -2   0  -4   11.70    0.29
   3   0   4   26.86    0.58
  -3   0  -4   25.58    0.61
   3   0   4   27.56    0.56
  -3   0   4   26.03    0.58
   4   0   4    0.53    0.05
  -4   0   4    0.62    0.05
  -4   0  -4    0.63    0.07
  -4   0   4    0.51    0.05
  -5   0   4   46.36    1.04
   5   0   4   48.27    1.04
  -5   0  -4   47.99    1.07
  -5   0   4   48.52    1.05
  -6   0  -4   21.60    0.56
   6   0   4   23.35    0.53
  -6   0   4   22.71    0.55
  -6   0   4   22.55    0.53
   7   0   4   11.52    0.31
  -7   0  -4   11.46    0.35
  -7   0   4   11.42    0.31
  -7   0   4   11.87    0.33
  -8   0   4    5.19    0.20
   8   0   4    5.17    0.19
  -8   0  -4    4.99    0.21
  -8   0   4    4.65    0.17
  -9   0  -4    0.99    0.11
  -9   0   4    1.09    0.11
  -9   0   4    1.22    0.09
 -10   0  -4    0.71    0.11
 -10   0   4    0.95    0.11
 -11   0  -4    3.60    0.21
 -11   0   4    3.54    0.20
 -12   0  -4    2.25    0.18
 -12   0   4    2.62    0.18
 -13   0   4    0.46    0.10
 -13   0  -4    0.53    0.12
 -14   0   4    0.47    0.11
 -14   0  -4    0.35    0.12
 -15   0  -4    2.77    0.30
 -15   0   4    3.04    0.24
   0   1   4   -0.28    0.02
   0   1  -4   -0.26    0.05
   0  -1  -4   -0.25    0.02
  -1   1   4    0.90    0.05
  -1  -1  -4    0.81    0.05
  -1   1   4    0.85    0.03
  -1   1  -4    1.03    0.09
  -1  -1   4    0.95    0.04
   1   1   4    1.02    0.04
  -2   1   4    4.41    0.12
  -2   1   4    4.52    0.13
   2  -1   4    4.31    0.12
  -2  -1  -4    4.43    0.13
   2   1   4    4.46    0.12
   2   1   4    4.47    0.11
  -2   1  -4    4.24    0.16
  -2  -1   4    4.39    0.12
   3  -1   4   12.12    0.28
  -3   1   4   12.17    0.29
  -3  -1  -4   12.28    0.30
   3   1   4   12.30    0.29
  -3   1  -4   12.13    0.33
   3   1   4   12.25    0.26
  -4  -1  -4    0.08    0.03
  -4   1   4    0.07    0.03
   4  -1   4    0.07    0.02
  -4   1   4    0.05    0.03
   4   1   4    0.06    0.02
  -4  -1   4    0.06    0.03
  -4   1  -4    0.05    0.04
  -5   1   4   11.68    0.30
  -5   1   4   11.85    0.30
   5  -1   4   11.44    0.29
  -5  -1  -4   11.00    0.31
  -5  -1   4   11.24    0.30
  -5   1  -4   11.39    0.33
   5   1   4   11.60    0.30
   6  -1   4   14.77    0.36
  -6  -1  -4   13.78    0.39
  -6   1   4   14.62    0.36
  -6   1   4   14.44    0.38
  -6  -1   4   14.66    0.38
   6   1   4   14.69    0.37
  -6   1  -4   14.35    0.41
  -7  -1  -4    8.01    0.27
   7  -1   4    7.95    0.24
  -7   1   4    8.36    0.26
  -7   1   4    8.28    0.23
   7   1   4    8.16    0.24
  -7   1  -4    7.71    0.28
  -7  -1   4    7.95    0.25
  -8   1   4    0.02    0.04
  -8  -1  -4    0.06    0.04
  -8   1   4    0.01    0.03
  -8  -1   4   -0.01    0.03
  -8   1  -4   -0.03    0.04
  -8  -1   4    0.01    0.04
   8   1   4    0.04    0.04
  -9   1   4    0.12    0.06
  -9   1   4    0.07    0.04
  -9  -1  -4    0.02    0.05
  -9   1  -4   -0.02    0.04
  -9  -1   4    0.11    0.05
  -9  -1   4    0.07    0.04
 -10   1   4    0.91    0.11
 -10  -1  -4    0.95    0.12
 -10   1  -4    1.12    0.14
 -10  -1   4    0.94    0.11
 -11  -1  -4    0.40    0.09
 -11   1   4    0.40    0.09
 -11  -1   4    0.44    0.09
 -11   1  -4    0.37    0.09
 -12   1   4    0.07    0.07
 -12  -1  -4    0.18    0.09
 -12  -1   4    0.19    0.07
 -12   1  -4    0.22    0.09
 -13  -1  -4    5.49    0.29
 -13   1   4    4.95    0.27
 -13  -1   4    5.45    0.27
 -13   1  -4    4.65    0.28
 -14   1   4    1.31    0.17
 -14  -1  -4    1.55    0.20
 -14  -1   4    1.11    0.16
 -14   1  -4    1.23    0.19
 -15  -1  -4    0.25    0.12
 -15   1   4    0.19    0.10
 -15  -1   4    0.38    0.13
   0   2  -4  551.94   11.95
   0   2   4  574.55   11.68
  -1   2   4  462.02    9.15
  -1   2   4  399.39    9.10
  -1  -2  -4  449.55    9.01
  -1   2  -4  438.32    9.34
  -2   2   4   20.37    0.44
   2  -2   4   20.30    0.43
  -2   2   4   19.62    0.46
  -2  -2  -4   20.21    0.44
   2   2   4   19.49    0.45
   2   2   4   20.50    0.44
  -2   2  -4   19.94    0.51
  -3   2   4   13.78    0.32
  -3  -2  -4   13.73    0.32
  -3   2   4   12.99    0.33
   3  -2   4   14.05    0.31
  -3  -2   4   13.65    0.33
   3   2   4   13.62    0.31
  -3   2  -4   12.78    0.37
  -3   2  -4   13.85    0.32
   3   2   4   13.35    0.32
  -4   2   4    8.10    0.22
  -4  -2  -4    8.19    0.23
  -4   2   4    8.13    0.22
   4  -2   4    8.26    0.21
  -4   2  -4    7.84    0.21
   4   2   4    8.30    0.22
  -4  -2   4    8.42    0.23
   4   2   4    8.16    0.20
  -4   2  -4    8.07    0.27
  -5   2   4    2.31    0.10
  -5  -2  -4    2.27    0.11
  -5   2   4    2.30    0.10
   5  -2   4    2.30    0.09
  -5   2  -4    2.32    0.13
  -5  -2   4    2.41    0.11
   5   2   4    2.40    0.10
  -5   2  -4    2.42    0.09
  -6  -2  -4   13.97    0.38
   6  -2   4   13.99    0.35
  -6   2   4   13.99    0.37
  -6   2   4   14.14    0.36
  -6  -2   4   14.11    0.37
  -6   2  -4   13.78    0.41
  -6   2  -4   13.68    0.33
   6   2   4   14.12    0.36
  -7   2   4    1.98    0.11
  -7   2   4    2.03    0.10
  -7  -2  -4    1.80    0.11
  -7  -2   4    1.93    0.11
  -7   2  -4    1.85    0.14
   7   2   4    1.95    0.11
  -8   2   4   10.55    0.32
  -8   2   4    9.71    0.28
  -8  -2  -4   10.09    0.32
  -8  -2   4    9.92    0.31
   8   2   4    9.68    0.30
  -8   2  -4   10.08    0.35
  -9   2   4    5.91    0.24
  -9   2   4    6.04    0.20
  -9  -2  -4    5.95    0.24
  -9  -2   4    5.74    0.23
  -9   2  -4    5.72    0.27
   9   2   4    6.07    0.22
 -10  -2  -4    1.04    0.12
 -10   2   4    1.04    0.12
 -10   2  -4    1.09    0.14
 -10  -2   4    1.04    0.11
 -11   2   4    0.28    0.08
 -11  -2  -4    0.28    0.08
 -11   2  -4    0.16    0.09
 -11  -2   4    0.25    0.08
 -12  -2  -4    0.76    0.12
 -12   2   4    1.04    0.13
 -12  -2   4    0.83    0.13
 -12   2  -4    0.91    0.15
 -13  -2  -4    0.09    0.08
 -13   2   4    0.03    0.07
 -13  -2   4    0.00    0.06
 -13   2  -4   -0.03    0.08
 -14  -2  -4    2.05    0.21
 -14   2   4    1.63    0.18
 -14  -2   4    2.33    0.21
 -14   2  -4    1.73    0.21
 -15  -2  -4    1.60    0.30
 -15   2   4    1.60    0.20
   0   3   4    0.01    0.02
   0   3  -4   -0.09    0.05
  -1  -3  -4   63.99    1.31
  -1   3   4   64.18    1.35
  -1   3   4   63.74    1.32
  -1   3  -4   62.01    1.37
   1   3   4   64.70    1.34
  -1   3  -4   62.81    1.44
  -1  -3   4   62.09    1.34
  -2   3   4   49.72    1.06
   2  -3   4   49.65    1.02
  -2  -3  -4   50.82    1.04
  -2   3   4   49.51    1.04
   2   3   4   47.66    1.05
   2   3   4   49.64    1.05
  -2   3  -4   50.05    1.14
  -2  -3   4   49.27    1.06
  -2   3  -4   48.21    1.08
  -3  -3  -4   20.06    0.45
  -3   3   4   20.06    0.45
   3  -3   4   19.62    0.43
  -3   3   4   19.16    0.46
   3   3   4   18.78    0.45
  -3  -3   4   20.56    0.46
  -3   3  -4   19.30    0.53
   3   3   4   19.61    0.45
  -3   3  -4   19.64    0.47
  -4   3   4   43.87    0.95
   4  -3   4   42.78    0.92
  -4   3   4   43.44    0.95
  -4  -3  -4   41.97    0.94
  -4   3  -4   43.40    0.94
  -4  -3   4   43.54    0.95
   4   3   4   42.55    0.94
   4   3   4   42.75    0.93
  -4   3  -4   43.54    1.02
  -5   3   4    3.06    0.12
  -5   3   4    2.95    0.12
  -5  -3  -4    2.81    0.12
   5   3   4    2.87    0.12
  -5   3  -4    2.93    0.16
  -5   3  -4    2.72    0.11
  -5  -3   4    2.77    0.12
   5   3   4    2.97    0.10
  -6   3   4   26.52    0.63
  -6  -3  -4   25.49    0.63
  -6   3   4   25.93    0.61
   6   3   4   26.14    0.62
  -6   3  -4   26.47    0.60
  -6   3  -4   26.73    0.69
  -6  -3   4   26.66    0.63
  -7   3   4    0.23    0.04
  -7   3   4    0.29    0.06
  -7  -3  -4    0.30    0.06
  -7   3  -4    0.31    0.07
  -7  -3   4    0.21    0.05
   7   3   4    0.13    0.04
  -8  -3  -4   13.31    0.39
  -8   3   4   13.04    0.39
  -8   3   4   13.41    0.36
  -8   3  -4   13.50    0.44
  -8  -3   4   13.62    0.39
   8   3   4   13.53    0.38
  -9  -3  -4    8.58    0.30
  -9   3   4    9.32    0.31
  -9   3   4    8.52    0.26
  -9   3  -4    9.10    0.35
   9   3   4    8.11    0.28
  -9  -3   4    8.58    0.30
 -10   3   4   33.08    0.84
 -10  -3  -4   33.70    0.84
 -10  -3   4   33.05    0.83
 -10   3  -4   31.61    0.89
 -11   3   4    2.00    0.16
 -11  -3  -4    2.13    0.18
 -11  -3   4    1.67    0.15
 -11   3  -4    1.57    0.19
 -12   3   4    3.12    0.20
 -12  -3  -4    2.73    0.19
 -12  -3   4    2.47    0.18
 -12   3  -4    3.12    0.23
 -13   3   4    0.38    0.11
 -13  -3  -4    0.16    0.09
 -13  -3   4    0.35    0.10
 -13   3  -4    0.48    0.13
 -14  -3  -4   10.72    0.43
 -14   3   4   10.74    0.44
 -14   3  -4   10.78    0.49
 -14  -3   4   10.61    0.42
 -15   3   4    0.94    0.16
   0   4   4    9.04    0.24
   0   4  -4    8.67    0.27
   0  -4  -4    9.24    0.20
   0   4  -4    8.66    0.33
  -1   4   4    2.16    0.09
  -1  -4  -4    2.06    0.06
  -1   4   4    2.08    0.09
  -1   4  -4    1.90    0.11
   1   4   4    1.93    0.09
  -1   4  -4    1.96    0.15
  -1  -4   4    2.02    0.08
   1   4   4    1.94    0.08
  -2   4   4   59.60    1.26
  -2   4   4   58.36    1.27
   2  -4   4   57.27    1.21
  -2  -4  -4   58.82    1.24
  -2   4  -4   58.65    1.29
   2   4   4   59.52    1.27
  -2  -4   4   59.03    1.26
  -2   4  -4   59.71    1.37
   2   4   4   60.22    1.26
  -3   4   4    6.86    0.20
  -3  -4  -4    6.85    0.18
  -3   4   4    6.44    0.20
   3   4   4    6.65    0.19
  -3   4  -4    6.62    0.21
  -3   4  -4    6.91    0.27
   3   4   4    6.56    0.19
  -4   4   4    3.63    0.14
  -4  -4  -4    3.83    0.13
  -4   4   4    3.69    0.14
  -4   4  -4    3.68    0.15
   4   4   4    3.86    0.13
  -4   4  -4    3.57    0.19
   4   4   4    3.53    0.13
  -4  -4   4    3.43    0.13
  -5   4   4   41.31    0.93
  -5  -4  -4   41.76    0.92
  -5   4   4   41.02    0.92
  -5   4  -4   40.52    0.92
   5   4   4   42.19    0.91
  -5   4  -4   40.61    1.01
  -5  -4   4   40.47    0.93
   5   4   4   41.09    0.92
  -6   4   4    7.74    0.25
  -6   4   4    7.65    0.23
  -6  -4  -4    7.99    0.24
  -6   4  -4    7.84    0.31
  -6   4  -4    7.35    0.23
  -6  -4   4    7.73    0.24
   6   4   4    7.80    0.22
   6   4   4    7.87    0.24
  -7  -4  -4    2.79    0.14
  -7   4   4    2.35    0.14
  -7   4   4    2.75    0.13
   7   4   4    2.53    0.13
  -7   4  -4    2.57    0.17
  -7  -4   4    2.50    0.13
  -8  -4  -4   21.50    0.56
  -8   4   4   20.83    0.53
  -8   4   4   22.72    0.58
  -8  -4   4   20.92    0.56
  -8   4  -4   22.04    0.64
   8   4   4   21.10    0.55
  -9  -4  -4    2.70    0.15
  -9   4   4    2.85    0.17
  -9   4   4    2.59    0.13
  -9   4  -4    2.53    0.19
  -9  -4   4    2.77    0.15
   9   4   4    2.67    0.15
 -10   4   4    2.94    0.18
 -10  -4  -4    2.82    0.17
 -10   4  -4    3.04    0.23
 -10  -4   4    2.84    0.17
 -11   4   4    0.34    0.10
 -11  -4  -4    0.25    0.08
 -11   4  -4    0.22    0.10
 -11  -4   4    0.30    0.08
 -12   4   4    0.46    0.10
 -12  -4  -4    0.54    0.11
 -12  -4   4    0.70    0.11
 -12   4  -4    0.60    0.14
 -13  -4  -4   -0.03    0.07
 -13   4   4   -0.03    0.08
 -13  -4   4   -0.08    0.06
 -13   4  -4    0.19    0.11
 -14   4   4    0.44    0.13
 -14  -4  -4    0.26    0.11
 -14  -4   4    0.56    0.12
 -14   4  -4    0.62    0.16
 -15   4   4    0.02    0.12
   0   5   4   -0.04    0.03
   0   5  -4   -0.04    0.04
   0  -5  -4   -0.06    0.01
   0   5  -4   -0.11    0.06
  -1   5   4    7.29    0.22
   1   5  -4    7.43    0.25
  -1   5   4    7.04    0.22
  -1  -5  -4    7.15    0.17
  -1   5  -4    7.23    0.24
  -1   5  -4    7.17    0.31
   1   5   4    7.19    0.19
  -1  -5   4    7.07    0.20
   1   5   4    7.30    0.22
  -2   5   4   10.79    0.30
  -2  -5  -4   10.99    0.26
  -2   5   4   11.10    0.30
   2   5   4   10.88    0.27
   2   5   4   10.48    0.29
  -2  -5   4   10.55    0.28
  -2   5  -4   10.93    0.32
  -2   5  -4   10.51    0.38
  -3   5   4   11.66    0.32
  -3  -5  -4   12.05    0.29
  -3   5   4   12.23    0.33
  -3   5  -4   11.85    0.34
   3   5   4   11.91    0.30
  -3  -5   4   11.87    0.31
  -3   5  -4   11.68    0.41
   3   5   4   12.09    0.32
  -4   5   4    0.46    0.06
  -4   5   4    0.46    0.06
  -4  -5  -4    0.34    0.05
  -4   5  -4    0.48    0.10
  -4  -5   4    0.31    0.05
   4   5   4    0.36    0.05
  -4   5  -4    0.45    0.07
   4   5   4    0.36    0.05
  -5  -5  -4    1.89    0.10
  -5   5   4    1.72    0.11
  -5   5   4    1.80    0.10
  -5  -5   4    1.76    0.10
  -5   5  -4    1.80    0.11
   5   5   4    1.98    0.10
  -5   5  -4    1.95    0.16
   5   5   4    1.83    0.10
  -6   5   4    5.26    0.21
  -6  -5  -4    4.90    0.18
  -6   5   4    5.12    0.19
  -6  -5   4    5.03    0.19
   6   5   4    5.29    0.18
  -6   5  -4    5.01    0.19
  -6   5  -4    5.42    0.26
   6   5   4    5.15    0.19
  -7  -5  -4   16.57    0.44
  -7   5   4   16.42    0.43
  -7   5   4   16.42    0.47
  -7   5  -4   16.87    0.54
  -7   5  -4   15.61    0.43
  -7  -5   4   16.16    0.45
   7   5   4   16.56    0.44
  -8   5   4    6.33    0.22
  -8   5   4    6.01    0.25
  -8  -5  -4    6.58    0.24
  -8   5  -4    6.33    0.31
  -8  -5   4    5.86    0.23
   8   5   4    6.16    0.23
  -9  -5  -4   37.81    0.91
  -9   5   4   36.87    0.94
  -9   5   4   37.83    0.88
   9   5   4   37.40    0.90
  -9  -5   4   37.42    0.91
  -9   5  -4   36.46    1.01
 -10  -5  -4   12.31    0.40
 -10   5   4   11.93    0.42
  10   5   4   11.78    0.39
 -10  -5   4   12.66    0.40
 -10   5  -4   12.26    0.48
 -11  -5  -4    2.17    0.16
 -11   5   4    1.93    0.19
 -11   5  -4    1.95    0.22
 -11  -5   4    1.55    0.15
 -12   5   4    0.06    0.08
 -12  -5  -4    0.25    0.08
 -12  -5   4    0.04    0.07
 -12   5  -4    0.18    0.11
 -13  -5  -4    4.96    0.26
 -13   5   4    4.48    0.28
 -13   5  -4    4.35    0.32
 -13  -5   4    4.13    0.24
 -14  -5  -4    0.84    0.14
 -14   5   4    0.82    0.16
 -14   5  -4    0.97    0.19
 -14  -5   4    0.69    0.13
   0   6  -4   26.56    0.67
   0   6   4   26.93    0.64
   0  -6  -4   26.68    0.58
  -1   6   4   28.48    0.66
  -1  -6  -4   27.67    0.60
   1   6  -4   27.40    0.70
  -1   6   4   27.09    0.67
  -1   6  -4   27.06    0.69
  -1  -6   4   27.12    0.63
   1   6   4   28.47    0.62
  -1   6  -4   26.11    0.77
   1   6   4   28.18    0.66
  -2   6   4    1.72    0.12
  -2  -6  -4    1.62    0.07
  -2   6   4    1.71    0.10
   2   6   4    1.68    0.10
  -2   6  -4    1.71    0.18
   2   6   4    1.67    0.08
  -2   6  -4    1.69    0.12
  -2  -6   4    1.84    0.09
  -3  -6  -4    0.28    0.04
  -3   6   4    0.18    0.05
  -3   6   4    0.26    0.06
  -3   6  -4    0.36    0.10
   3   6   4    0.33    0.06
  -3   6  -4    0.24    0.06
  -3  -6   4    0.23    0.04
   3   6   4    0.26    0.04
  -4   6   4    2.85    0.14
  -4   6   4    2.48    0.14
  -4  -6  -4    2.70    0.11
  -4   6  -4    2.79    0.20
   4   6   4    2.60    0.13
  -4  -6   4    2.53    0.12
  -4   6  -4    2.59    0.14
   4   6   4    2.69    0.12
  -5  -6  -4    0.03    0.03
  -5   6   4   -0.01    0.05
  -5   6   4   -0.02    0.03
  -5  -6   4   -0.01    0.03
  -5   6  -4    0.07    0.08
   5   6   4   -0.06    0.03
   5   6   4   -0.03    0.03
  -5   6  -4   -0.04    0.03
  -6   6   4   13.61    0.42
  -6   6   4   14.06    0.39
  -6  -6  -4   14.18    0.38
  -6  -6   4   14.26    0.40
   6   6   4   14.25    0.39
  -6   6  -4   14.46    0.41
  -6   6  -4   14.97    0.50
   6   6   4   14.39    0.40
  -7   6   4    0.05    0.06
  -7  -6  -4    0.00    0.04
  -7   6   4    0.00    0.04
  -7  -6   4    0.04    0.04
  -7   6  -4    0.07    0.05
  -7   6  -4   -0.06    0.08
   7   6   4   -0.04    0.04
  -8   6   4    5.21    0.20
  -8   6   4    5.14    0.24
  -8  -6  -4    4.90    0.20
  -8   6  -4    4.83    0.29
   8   6   4    4.51    0.20
  -8  -6   4    4.83    0.21
  -9   6   4    0.15    0.06
  -9   6   4    0.11    0.08
  -9  -6  -4    0.25    0.07
  -9  -6   4    0.22    0.07
  -9   6  -4    0.20    0.10
   9   6   4    0.15    0.06
 -10   6   4    1.19    0.14
 -10  -6  -4    1.66    0.15
  10   6   4    1.32    0.13
 -10  -6   4    1.40    0.14
 -10   6  -4    1.68    0.21
 -11   6   4    3.15    0.22
 -11  -6  -4    2.69    0.18
 -11   6  -4    3.41    0.27
 -11  -6   4    2.77    0.18
 -12  -6  -4    0.28    0.09
 -12   6   4    0.34    0.11
 -12   6  -4    0.27    0.14
 -12  -6   4    0.53    0.10
 -13  -6  -4    0.30    0.09
 -13   6   4    0.47    0.14
 -13   6  -4    0.66    0.18
 -13  -6   4    0.34    0.10
 -14   6   4   -0.03    0.10
 -14  -6  -4    0.00    0.08
   0   7  -4    0.00    0.04
   0  -7  -4    0.01    0.02
   0  -7   4   -0.01    0.03
   0   7   4   -0.01    0.04
   0   7   4    0.00    0.02
  -1   7   4    8.52    0.27
  -1  -7  -4    8.33    0.21
   1   7  -4    8.45    0.30
  -1   7  -4    7.57    0.36
  -1   7  -4    8.41    0.30
   1   7   4    8.39    0.27
  -1  -7   4    7.74    0.23
   1   7   4    8.25    0.22
   1  -7  -4    8.19    0.20
  -2   7   4    3.30    0.17
  -2  -7  -4    2.98    0.11
  -2   7   4    3.04    0.15
   2   7  -4    3.11    0.17
  -2   7  -4    2.83    0.16
   2   7   4    3.22    0.12
  -2  -7   4    3.15    0.13
  -2   7  -4    3.21    0.23
   2   7   4    3.04    0.15
  -3   7   4    0.79    0.09
  -3   7   4    0.94    0.11
  -3  -7  -4    0.76    0.06
  -3   7  -4    0.88    0.15
  -3  -7   4    0.68    0.07
   3   7   4    0.68    0.08
  -3   7  -4    0.80    0.10
   3   7   4    0.87    0.07
  -4   7   4    0.96    0.10
  -4   7   4    1.06    0.12
  -4  -7  -4    0.98    0.07
  -4  -7   4    0.96    0.08
   4   7   4    0.95    0.10
  -4   7  -4    0.92    0.11
   4   7   4    0.89    0.08
  -4   7  -4    1.11    0.17
  -5   7   4    3.97    0.18
  -5  -7  -4    3.74    0.15
  -5   7   4    3.52    0.19
  -5   7  -4    3.85    0.25
   5   7   4    3.76    0.18
  -5  -7   4    3.80    0.16
   5   7   4    3.80    0.16
  -5   7  -4    3.67    0.19
  -6  -7  -4    8.50    0.26
  -6   7   4    8.47    0.31
  -6   7   4    7.91    0.28
   6   7   4    8.66    0.29
   6   7   4    8.31    0.27
  -6   7  -4    8.47    0.30
  -6  -7   4    8.65    0.28
  -6   7  -4    8.13    0.38
  -7   7   4   41.47    1.04
  -7   7   4   41.56    0.98
  -7  -7  -4   41.63    0.97
  -7   7  -4   41.47    1.13
  -7  -7   4   42.33    0.98
  -7   7  -4   40.55    0.99
   7   7   4   41.98    0.97
  -8   7   4    6.30    0.24
  -8   7   4    6.57    0.29
  -8  -7  -4    6.14    0.24
   8   7   4    6.27    0.24
  -8   7  -4    6.02    0.34
  -8  -7   4    6.38    0.25
  -9   7   4    2.82    0.16
  -9  -7  -4    2.50    0.16
  -9   7   4    2.81    0.20
   9   7   4    3.12    0.17
  -9  -7   4    2.49    0.16
  -9   7  -4    2.36    0.25
 -10   7   4    3.03    0.22
 -10  -7  -4    2.72    0.17
  10   7   4    3.07    0.18
 -10   7  -4    2.55    0.27
 -10  -7   4    2.92    0.18
 -11  -7  -4    1.42    0.15
 -11   7   4    1.58    0.20
 -11  -7   4    1.69    0.17
 -11   7  -4    1.37    0.21
 -12   7   4    1.77    0.21
 -12  -7  -4    1.91    0.18
 -12   7  -4    1.99    0.26
 -12  -7   4    1.91    0.18
 -13  -7  -4    1.88    0.19
 -13  -7   4    1.80    0.19
 -13   7  -4    1.38    0.23
 -14  -7  -4    2.47    0.26
   0   8  -4   15.86    0.48
   0  -8   4   16.01    0.40
   0   8   4   16.30    0.45
   0  -8  -4   15.77    0.38
   0   8   4   15.30    0.38
   1   8  -4    3.05    0.18
  -1   8   4    2.91    0.15
  -1  -8  -4    2.72    0.10
   1   8   4    2.60    0.15
  -1  -8   4    2.76    0.12
  -1   8  -4    2.64    0.17
   1   8   4    2.69    0.11
  -1   8  -4    2.90    0.27
   1  -8  -4    2.74    0.13
  -2   8   4    0.07    0.08
  -2  -8  -4    0.11    0.03
  -2   8   4    0.05    0.05
   2   8  -4    0.05    0.06
   2   8   4    0.05    0.05
  -2   8  -4    0.08    0.10
  -2   8  -4    0.09    0.06
  -2  -8   4    0.07    0.04
   2   8   4    0.13    0.04
  -3   8   4    1.22    0.12
  -3   8   4    1.43    0.20
  -3  -8  -4    1.43    0.08
  -3  -8   4    1.38    0.09
  -3   8  -4    1.58    0.20
   3   8   4    1.13    0.08
   3   8   4    1.27    0.12
  -3   8  -4    1.25    0.13
  -4   8   4    4.34    0.20
  -4  -8  -4    4.11    0.15
   4   8   4    4.40    0.16
  -4  -8   4    4.03    0.17
  -4   8  -4    4.67    0.30
   4   8   4    4.28    0.20
  -4   8  -4    4.30    0.22
  -5  -8  -4    0.28    0.05
  -5   8   4    0.30    0.08
   5   8   4    0.27    0.05
   5   8   4    0.30    0.07
  -5   8  -4    0.27    0.07
  -5   8  -4    0.22    0.11
  -5  -8   4    0.19    0.05
  -6  -8  -4    2.49    0.13
  -6   8   4    2.30    0.15
  -6   8  -4    2.43    0.16
  -6   8  -4    2.34    0.25
  -6  -8   4    2.09    0.13
   6   8   4    2.29    0.15
   6   8   4    1.94    0.12
  -7   8   4    1.25    0.13
  -7  -8  -4    1.27    0.11
  -7   8  -4    1.50    0.14
   7   8   4    1.21    0.11
  -7   8  -4    1.11    0.18
  -7  -8   4    1.24    0.12
  -8   8   4    6.12    0.26
  -8  -8  -4    5.90    0.24
   8   8   4    6.28    0.24
  -8   8  -4    6.97    0.38
  -8  -8   4    6.33    0.25
  -9  -8  -4    4.36    0.20
  -9   8   4    4.30    0.21
  -9   8  -4    3.06    0.30
   9   8   4    3.74    0.19
  -9  -8   4    3.93    0.20
 -10  -8  -4   15.32    0.48
 -10   8  -4   15.70    0.63
 -10  -8   4   15.55    0.49
 -11  -8  -4    0.06    0.07
 -11   8  -4    0.38    0.15
 -11  -8   4    0.16    0.08
 -12  -8  -4    2.44    0.18
 -12   8  -4    2.02    0.28
 -12  -8   4    1.98    0.19
 -13  -8  -4    0.68    0.13
 -13   8  -4    0.49    0.19
   0   9  -4    0.03    0.06
   0  -9   4   -0.02    0.03
   0   9   4    0.10    0.06
  -1   9   4    0.41    0.08
   1   9  -4    0.51    0.11
  -1   9  -4    0.45    0.10
  -1  -9   4    0.49    0.07
   1   9   4    0.40    0.09
  -1   9  -4    0.44    0.13
   1   9   4    0.40    0.05
   2   9  -4    0.94    0.13
  -2   9   4    1.19    0.13
  -2   9  -4    0.99    0.13
  -2  -9   4    0.98    0.09
  -2   9  -4    0.89    0.17
   2   9   4    0.92    0.12
   2   9   4    0.85    0.08
  -3   9   4    2.35    0.15
  -3  -9   4    2.14    0.12
   3   9   4    2.29    0.11
  -3   9  -4    2.36    0.17
   3   9   4    2.11    0.16
  -3   9  -4    2.43    0.27
  -4   9   4    8.54    0.31
   4   9   4    8.12    0.26
   4   9   4    8.30    0.31
  -4   9  -4    9.19    0.43
  -4  -9   4    8.45    0.27
  -4   9  -4    8.67    0.34
  -5   9   4    0.09    0.06
  -5   9  -4    0.30    0.13
   5   9   4    0.25    0.06
  -5  -9   4    0.25    0.06
  -5   9  -4    0.16    0.08
   5   9   4    0.20    0.07
  -6   9   4    8.35    0.31
  -6   9  -4    7.98    0.42
  -6   9  -4    8.35    0.33
   6   9   4    8.34    0.32
  -6  -9   4    8.11    0.28
   6   9   4    7.83    0.27
  -7   9   4    0.05    0.06
  -7   9  -4   -0.04    0.09
  -7   9  -4    0.06    0.07
  -7  -9   4    0.07    0.06
   7   9   4    0.05    0.05
  -8   9   4    0.31    0.09
  -8  -9   4    0.30    0.07
  -8   9  -4   -0.01    0.12
   8   9   4    0.32    0.08
  -9   9   4    1.60    0.16
  -9  -9   4    1.55    0.15
  -9   9  -4    1.23    0.21
   9   9   4    1.58    0.15
 -10  -9   4    1.25    0.15
 -10   9  -4    1.22    0.22
 -11  -9   4    0.06    0.07
 -11   9  -4    0.11    0.14
 -12  -9   4   -0.02    0.07
 -12   9  -4    0.20    0.16
   0 -10   4   47.65    1.08
   0  10   4   47.52    1.16
   0  10  -4   48.75    1.21
  -1  10   4    8.01    0.32
   1  10  -4    8.59    0.35
   1 -10   4    8.61    0.27
  -1 -10   4    8.42    0.27
   1  10   4    8.95    0.33
  -1  10  -4    8.17    0.34
  -2  10   4    4.47    0.23
   2  10  -4    4.64    0.26
  -2  10  -4    4.37    0.32
  -2  10  -4    4.96    0.25
   2  10   4    4.34    0.22
  -2 -10   4    4.33    0.18
  -3  10   4    2.09    0.16
   3  10  -4    1.95    0.19
  -3 -10   4    2.12    0.12
  -3  10  -4    2.17    0.26
   3  10   4    2.15    0.18
  -3  10  -4    2.39    0.21
  -4  10   4    0.33    0.09
  -4 -10   4    0.41    0.07
   4  10   4    0.30    0.06
   4  10   4    0.38    0.09
  -4  10  -4    0.22    0.08
  -4  10  -4    0.35    0.13
  -5  10   4   10.65    0.38
  -5  10  -4   11.33    0.52
  -5  10  -4   10.29    0.39
  -5 -10   4   10.52    0.34
   5  10   4   10.91    0.39
   5  10   4   10.53    0.32
  -6  10   4   24.51    0.68
   6  10   4   24.78    0.69
  -6  10  -4   24.09    0.84
  -6  10  -4   23.31    0.70
  -6 -10   4   24.48    0.64
   6  10   4   24.57    0.62
  -7  10   4    3.97    0.22
  -7  10  -4    4.50    0.25
  -7  10  -4    4.29    0.37
   7  10   4    3.98    0.19
  -7 -10   4    4.34    0.21
  -8  10   4    0.05    0.07
  -8  10  -4    0.10    0.12
   8  10   4    0.09    0.06
  -8 -10   4    0.10    0.06
  -9  10   4    0.48    0.11
  -9  10  -4    0.22    0.15
  -9 -10   4    0.56    0.11
   9  10   4    0.54    0.10
 -10  10  -4    0.66    0.19
 -10 -10   4    0.91    0.13
 -11  10  -4   -0.06    0.14
 -11 -10   4   -0.05    0.07
   0 -11   4   -0.01    0.04
   0  11  -4    0.01    0.07
   0  11   4   -0.06    0.07
   1  11  -4    2.21    0.22
  -1  11   4    1.65    0.17
   1 -11   4    1.77    0.11
  -1 -11   4    1.87    0.12
   1  11   4    1.67    0.17
  -1  11  -4    1.70    0.19
  -2  11   4    5.17    0.26
   2  11  -4    5.96    0.30
   2  11   4    5.32    0.27
  -2  11  -4    5.64    0.29
  -2 -11   4    5.36    0.21
  -3  11   4    1.23    0.15
   3  11  -4    1.11    0.16
   3  11   4    1.18    0.15
  -3  11  -4    0.98    0.20
  -3 -11   4    1.15    0.11
  -3  11  -4    0.97    0.15
  -4  11   4    1.54    0.16
  -4 -11   4    1.97    0.13
  -4  11  -4    2.06    0.20
  -4  11  -4    1.93    0.27
   4  11   4    1.99    0.19
  -5  11   4    0.20    0.09
  -5  11  -4    0.29    0.16
  -5  11  -4    0.22    0.10
  -5 -11   4    0.23    0.07
   5  11   4    0.11    0.09
  -6  11   4    0.29    0.09
  -6 -11   4    0.46    0.08
  -6  11  -4    0.27    0.10
   6  11   4    0.30    0.10
  -6  11  -4    0.58    0.18
  -7  11   4    0.21    0.09
  -7  11  -4    0.17    0.15
  -7 -11   4    0.26    0.07
  -7  11  -4    0.15    0.09
  -8  11   4    0.17    0.08
   8  11   4    0.15    0.07
  -8  11  -4    0.27    0.16
  -8 -11   4    0.26    0.08
  -9  11   4    0.56    0.12
  -9  11  -4    0.92    0.21
  -9 -11   4    0.79    0.12
 -10  11  -4    1.01    0.22
 -10 -11   4    1.10    0.14
 -11  11  -4    0.26    0.17
   0 -12   4    0.83    0.10
   0  12  -4    1.20    0.18
   0  12   4    0.91    0.14
   1  12  -4   17.17    0.58
  -1  12   4   17.01    0.55
   1 -12   4   16.44    0.46
   1  12   4   15.85    0.54
  -1  12  -4   16.49    0.58
  -1 -12   4   16.63    0.46
  -2  12   4   -0.02    0.07
   2  12  -4   -0.04    0.08
   2 -12   4   -0.04    0.04
  -2  12  -4    0.01    0.08
  -2 -12   4   -0.09    0.04
   2  12   4    0.07    0.08
   3  12  -4    0.15    0.10
  -3  12   4    0.30    0.10
  -3 -12   4    0.14    0.06
  -3  12  -4    0.07    0.09
  -3  12  -4    0.22    0.14
   3  12   4    0.06    0.08
  -4  12   4    0.66    0.13
  -4  12  -4    0.74    0.20
   4  12   4    0.60    0.13
  -4  12  -4    0.50    0.12
  -4 -12   4    0.59    0.09
  -5  12   4    2.97    0.22
  -5  12  -4    2.75    0.32
  -5  12  -4    2.69    0.24
  -5 -12   4    2.49    0.16
   5  12   4    3.01    0.22
  -6  12   4    1.12    0.16
  -6  12  -4    1.14    0.17
  -6  12  -4    0.94    0.22
  -6 -12   4    1.37    0.13
  -7  12   4    1.49    0.19
  -7  12  -4    1.57    0.28
  -7  12  -4    1.57    0.19
  -7 -12   4    1.30    0.14
  -8  12   4    0.42    0.12
  -8  12  -4    0.44    0.19
  -8 -12   4    0.25    0.08
  -9  12   4    0.34    0.11
  -9  12  -4    0.55    0.20
  -9 -12   4    0.19    0.08
 -10 -12   4   -0.07    0.07
 -10  12  -4   -0.07    0.16
   0  13  -4   -0.08    0.09
   0  13   4    0.14    0.09
   0 -13   4   -0.05    0.04
   1 -13   4    5.43    0.22
   1  13  -4    5.97    0.34
  -1  13   4    5.57    0.30
   1  13   4    4.67    0.29
  -1 -13   4    5.44    0.22
  -1  13  -4    5.16    0.31
  -2  13   4    2.20    0.22
   2  13  -4    1.89    0.22
   2 -13   4    2.08    0.13
   2  13   4    1.89    0.20
  -2 -13   4    1.82    0.13
  -2  13  -4    1.99    0.22
  -3  13   4    0.24    0.10
  -3  13  -4    0.05    0.09
  -3 -13   4    0.08    0.06
   3  13   4    0.07    0.09
  -4  13   4    0.22    0.11
  -4  13  -4   -0.08    0.07
  -4  13  -4    0.11    0.16
  -4 -13   4    0.01    0.05
   4  13   4    0.02    0.09
  -5  13   4    0.24    0.12
  -5  13  -4    0.30    0.12
   5  13   4    0.46    0.13
  -5 -13   4    0.18    0.07
  -5  13  -4    0.54    0.20
  -6  13   4    0.21    0.11
  -6  13  -4    0.03    0.16
  -6 -13   4    0.26    0.08
  -6  13  -4    0.34    0.12
  -7  13   4    1.08    0.16
  -7  13  -4    1.08    0.25
  -7 -13   4    0.95    0.12
  -7  13  -4    1.07    0.16
  -8  13   4    0.93    0.16
  -8 -13   4    1.10    0.14
  -9  13   4    0.14    0.11
  -9 -13   4    0.02    0.11
   0  14   4    2.69    0.25
   0  14  -4    3.51    0.27
   1  14  -4   -0.01    0.10
  -1  14   4    0.03    0.09
   1  14   4    0.09    0.10
  -1  14  -4    0.22    0.12
   2  14  -4    0.45    0.14
  -2  14   4    0.44    0.13
   2  14   4    0.13    0.11
  -2  14  -4    0.43    0.14
  -3  14   4    3.45    0.27
  -3  14  -4    3.50    0.27
  -3 -14   4    3.47    0.27
   3  14   4    4.37    0.29
  -4  14   4    0.06    0.09
  -4  14  -4    0.01    0.09
   4  14   4    0.08    0.11
  -4 -14   4    0.00    0.08
  -5  14   4    0.33    0.13
  -5 -14   4    0.14    0.09
  -5  14  -4    0.06    0.11
   5  14   4    0.36    0.13
  -6  14   4    0.23    0.13
  -6 -14   4    0.16    0.10
  -6  14  -4    0.33    0.13
  -7  14  -4    0.48    0.15
   0  15   4    0.19    0.12
   0  15  -4    0.13    0.11
  -1  15   4    0.28    0.14
   1  15  -4    0.38    0.14
   1  15   4    0.42    0.14
  -1  15  -4    0.61    0.16
   2  15  -4    3.95    0.40
   2  15   4    3.84    0.30
  -2  15  -4    5.03    0.38
   3  15   4    0.47    0.15
   4  15   4    4.65    0.32
   5  15   4   -0.14    0.10
   0   0  -5    0.16    0.04
  -1   0   5    0.02    0.01
  -1   0  -5   -0.03    0.03
   2   0   5    0.00    0.01
  -2   0  -5   -0.01    0.03
  -2   0   5    0.01    0.01
   3   0   5    0.01    0.01
   3   0   5    0.00    0.02
  -3   0   5    0.04    0.02
  -3   0  -5    0.01    0.03
  -4   0  -5    0.02    0.04
  -4   0   5    0.00    0.02
   4   0   5    0.00    0.02
  -4   0   5   -0.02    0.02
   5   0   5   -0.01    0.02
  -5   0   5    0.05    0.03
  -5   0   5    0.01    0.02
  -5   0  -5    0.00    0.04
  -6   0  -5   -0.02    0.03
  -6   0   5    0.02    0.03
   6   0   5    0.01    0.03
  -6   0   5    0.01    0.03
  -7   0  -5    0.00    0.04
  -7   0   5    0.00    0.03
  -7   0   5    0.01    0.03
   7   0   5   -0.01    0.03
  -8   0  -5    0.00    0.05
   8   0   5   -0.01    0.03
  -8   0   5    0.00    0.03
  -8   0   5   -0.03    0.03
  -9   0   5    0.00    0.04
   9   0   5    0.00    0.04
  -9   0   5   -0.01    0.03
  -9   0  -5   -0.02    0.05
 -10   0  -5    0.09    0.07
 -10   0   5    0.00    0.05
 -11   0  -5    0.06    0.07
 -11   0   5   -0.08    0.05
 -12   0   5   -0.04    0.06
 -12   0  -5   -0.03    0.07
 -13   0  -5   -0.02    0.07
 -13   0   5    0.07    0.08
 -14   0   5   -0.05    0.07
 -14   0  -5    0.06    0.09
 -15   0   5    0.00    0.07
   0  -1  -5   -0.03    0.03
   0   1  -5   -0.06    0.04
   0   1   5   -0.05    0.02
  -1   1   5   85.43    1.79
  -1  -1  -5   84.86    1.78
  -1   1   5   84.90    1.78
  -1  -1   5   86.87    1.81
  -1   1  -5   82.77    1.84
   1   1   5   86.13    1.77
   2  -1   5    0.33    0.03
  -2  -1  -5    0.31    0.04
  -2   1   5    0.31    0.03
  -2   1   5    0.31    0.04
   2   1   5    0.32    0.03
  -2  -1   5    0.29    0.03
   2   1   5    0.30    0.03
  -2   1  -5    0.31    0.06
   3  -1   5   29.46    0.64
  -3   1   5   29.59    0.64
  -3   1   5   28.39    0.66
  -3  -1  -5   29.20    0.66
   3   1   5   29.97    0.62
   3   1   5   29.69    0.65
  -3  -1   5   29.44    0.65
  -3   1  -5   29.05    0.70
  -4   1   5    7.31    0.21
   4  -1   5    7.35    0.20
  -4  -1  -5    7.64    0.22
  -4   1   5    7.50    0.20
  -4  -1   5    7.71    0.21
  -4   1  -5    7.24    0.24
   4   1   5    7.63    0.17
   4   1   5    7.35    0.20
  -5  -1  -5    4.92    0.18
  -5   1   5    4.80    0.16
  -5   1   5    5.20    0.17
   5  -1   5    5.08    0.16
  -5  -1   5    5.21    0.17
   5   1   5    5.34    0.16
  -5   1  -5    5.07    0.20
  -6   1   5   28.14    0.65
  -6   1   5   27.98    0.65
   6  -1   5   28.55    0.64
  -6  -1  -5   27.28    0.67
  -6   1  -5   27.38    0.70
   6   1   5   27.52    0.65
  -6  -1   5   28.24    0.66
  -7  -1  -5    5.27    0.21
  -7   1   5    5.46    0.18
  -7   1   5    5.35    0.19
   7  -1   5    5.66    0.18
   7   1   5    5.46    0.19
  -7  -1   5    5.46    0.20
  -7   1  -5    5.27    0.22
  -8   1   5    1.45    0.09
   8  -1   5    1.51    0.10
  -8   1   5    1.44    0.11
  -8  -1  -5    1.65    0.12
  -8  -1   5    1.42    0.09
  -8  -1   5    1.33    0.11
  -8   1  -5    1.42    0.14
   8   1   5    1.55    0.10
  -9  -1  -5    0.06    0.05
  -9   1   5    0.03    0.04
  -9   1   5    0.00    0.05
  -9  -1   5    0.00    0.04
   9   1   5   -0.02    0.04
  -9  -1   5   -0.01    0.04
  -9   1  -5    0.00    0.06
 -10  -1  -5   31.83    0.84
 -10   1   5   32.78    0.82
 -10   1  -5   32.07    0.86
 -10  -1   5   32.60    0.82
 -11   1   5    1.18    0.13
 -11  -1  -5    0.93    0.13
 -11  -1   5    1.00    0.13
 -11   1  -5    1.11    0.15
 -12   1   5   -0.05    0.06
 -12  -1  -5    0.05    0.07
 -12   1  -5    0.01    0.08
 -12  -1   5   -0.01    0.06
 -13  -1  -5    1.30    0.17
 -13   1   5    1.03    0.14
 -13  -1   5    0.95    0.14
 -13   1  -5    0.92    0.15
 -14  -1  -5    7.05    0.36
 -14   1   5    6.80    0.33
 -14   1  -5    7.17    0.37
 -14  -1   5    6.59    0.32
 -15   1   5    0.69    0.14
   0   2  -5 1000.00   18.42
   0   2   5  731.05   18.59
  -1  -2  -5  486.03    9.82
  -1   2   5  469.84    9.91
   1   2   5  482.98    9.89
  -1  -2   5  462.41   10.96
  -1   2  -5  475.03   10.22
  -2  -2  -5    0.00    0.02
  -2   2   5    0.02    0.02
  -2   2   5    0.01    0.01
   2  -2   5    0.00    0.01
   2   2   5   -0.01    0.02
  -2   2  -5    0.08    0.05
  -2  -2   5   -0.02    0.01
   2   2   5    0.02    0.02
  -3   2   5    2.61    0.09
  -3  -2  -5    2.53    0.10
   3  -2   5    2.52    0.08
  -3   2   5    2.57    0.10
   3   2   5    2.67    0.10
   3   2   5    2.72    0.08
  -3  -2   5    2.35    0.09
  -3   2  -5    2.31    0.13
  -4   2   5    2.99    0.11
   4  -2   5    2.92    0.10
  -4  -2  -5    2.98    0.12
  -4   2   5    2.73    0.11
  -4   2  -5    2.69    0.15
   4   2   5    3.09    0.11
  -4  -2   5    2.90    0.11
   4   2   5    3.12    0.09
  -5   2   5   19.95    0.49
  -5   2   5   20.86    0.50
   5  -2   5   20.58    0.48
  -5  -2  -5   21.23    0.51
   5   2   5   21.50    0.50
  -5   2  -5   20.59    0.55
  -5  -2   5   20.66    0.50
   5   2   5   20.91    0.45
   6  -2   5   34.80    0.77
  -6   2   5   33.55    0.78
  -6   2   5   34.40    0.79
  -6  -2  -5   34.47    0.80
  -6  -2   5   34.04    0.79
   6   2   5   34.31    0.78
  -6   2  -5   33.74    0.84
  -7  -2  -5    4.23    0.18
  -7   2   5    4.15    0.15
   7  -2   5    4.03    0.15
  -7   2   5    4.01    0.16
  -7  -2   5    3.86    0.16
  -7   2  -5    3.79    0.20
   7   2   5    4.26    0.16
  -8   2   5    1.73    0.12
  -8   2   5    1.47    0.09
  -8  -2  -5    1.64    0.12
  -8  -2   5    1.48    0.10
  -8   2  -5    1.29    0.14
   8   2   5    1.45    0.10
  -9   2   5    1.20    0.11
  -9   2   5    0.96    0.09
  -9  -2  -5    0.96    0.11
   9   2   5    1.40    0.11
  -9   2  -5    1.26    0.15
  -9  -2   5    1.03    0.11
 -10  -2  -5    0.11    0.07
 -10   2   5    0.20    0.07
  10   2   5    0.13    0.05
 -10  -2   5    0.14    0.07
 -10   2  -5    0.03    0.07
 -11  -2  -5    1.78    0.17
 -11   2   5    2.02    0.18
 -11   2  -5    1.81    0.19
 -11  -2   5    1.79    0.14
 -12   2   5    0.79    0.12
 -12  -2  -5    0.73    0.12
 -12   2  -5    0.92    0.16
 -12  -2   5    0.92    0.13
 -13   2   5    0.19    0.08
 -13  -2  -5    0.18    0.08
 -13  -2   5    0.02    0.07
 -13   2  -5    0.08    0.09
 -14  -2  -5    0.10    0.10
 -14   2   5    0.21    0.10
 -14   2  -5    0.11    0.11
 -14  -2   5    0.08    0.08
 -15   2   5    4.17    0.27
   0   3   5   -0.18    0.02
   0   3  -5   -0.22    0.06
  -1  -3  -5   13.89    0.30
  -1   3   5   14.26    0.34
  -1  -3   5   13.63    0.33
  -1   3  -5   13.68    0.42
   1   3   5   13.89    0.33
  -2  -3  -5    1.52    0.06
   2  -3   5    1.54    0.05
  -2   3   5    1.59    0.08
  -2   3   5    1.44    0.06
  -2  -3   5    1.43    0.07
  -2   3  -5    1.41    0.13
   2   3   5    1.56    0.07
   2   3   5    1.64    0.07
  -3   3   5    0.28    0.04
   3  -3   5    0.29    0.03
  -3   3   5    0.30    0.04
  -3  -3  -5    0.28    0.04
   3   3   5    0.29    0.04
  -3   3  -5    0.15    0.06
  -3   3  -5    0.29    0.05
   3   3   5    0.24    0.04
  -3  -3   5    0.26    0.04
  -4   3   5    0.67    0.06
   4  -3   5    0.61    0.04
  -4   3   5    0.62    0.06
  -4  -3  -5    0.64    0.06
  -4  -3   5    0.52    0.06
   4   3   5    0.68    0.05
  -4   3  -5    0.57    0.09
  -4   3  -5    0.52    0.06
   4   3   5    0.49    0.05
   5  -3   5    0.38    0.04
  -5   3   5    0.33    0.05
  -5  -3  -5    0.34    0.05
  -5   3   5    0.45    0.06
  -5   3  -5    0.36    0.05
   5   3   5    0.51    0.06
  -5  -3   5    0.46    0.06
   5   3   5    0.46    0.04
  -5   3  -5    0.42    0.08
  -6  -3  -5    6.54    0.22
  -6   3   5    6.80    0.21
   6  -3   5    6.65    0.19
  -6   3   5    6.86    0.22
  -6  -3   5    6.85    0.22
   6   3   5    6.41    0.21
  -6   3  -5    6.85    0.28
  -6   3  -5    6.74    0.20
  -7   3   5   62.35    1.37
  -7  -3  -5   60.62    1.37
  -7   3   5   61.84    1.35
  -7  -3   5   63.54    1.37
  -7   3  -5   59.93    1.44
   7   3   5   61.48    1.36
  -8   3   5    0.01    0.04
  -8  -3  -5   -0.06    0.04
  -8   3   5    0.05    0.04
  -8  -3   5    0.00    0.04
  -8   3  -5    0.06    0.06
   8   3   5   -0.01    0.03
  -9   3   5   18.45    0.47
  -9   3   5   17.32    0.51
  -9  -3  -5   18.77    0.52
  -9  -3   5   18.87    0.51
  -9   3  -5   18.71    0.58
   9   3   5   17.89    0.49
 -10  -3  -5    2.26    0.16
 -10   3   5    2.05    0.15
 -10  -3   5    1.84    0.14
  10   3   5    2.01    0.14
 -10   3  -5    1.86    0.19
 -11  -3  -5    1.37    0.15
 -11   3   5    1.25    0.15
 -11   3  -5    1.06    0.16
 -11  -3   5    1.13    0.13
 -12  -3  -5    0.53    0.11
 -12   3   5    0.51    0.11
 -12   3  -5    0.84    0.15
 -12  -3   5    0.70    0.12
 -13   3   5    0.18    0.09
 -13  -3  -5    0.20    0.09
 -13   3  -5    0.22    0.12
 -13  -3   5    0.14    0.08
 -14   3   5    1.49    0.19
 -14  -3  -5    1.45    0.18
 -14  -3   5    1.41    0.17
 -14   3  -5    1.47    0.21
 -15   3   5    0.77    0.15
   0   4   5  140.97    2.99
   0   4  -5  140.61    3.07
  -1  -4  -5    7.83    0.17
  -1   4   5    7.62    0.21
  -1   4   5    7.29    0.19
  -1   4  -5    7.90    0.31
  -1  -4   5    7.62    0.20
  -1   4  -5    7.06    0.23
   1   4   5    7.27    0.21
   2  -4   5    0.12    0.01
  -2   4   5    0.17    0.04
  -2   4   5    0.09    0.03
  -2  -4  -5    0.09    0.02
  -2   4  -5    0.06    0.07
   2   4   5    0.04    0.03
  -2   4  -5    0.08    0.04
   2   4   5    0.07    0.03
  -2  -4   5    0.14    0.03
  -3  -4  -5    3.29    0.11
  -3   4   5    3.13    0.11
  -3   4   5    3.28    0.13
   3  -4   5    3.37    0.09
  -3   4  -5    3.40    0.19
   3   4   5    3.24    0.12
  -3  -4   5    3.23    0.12
  -3   4  -5    3.09    0.14
   3   4   5    3.42    0.12
   4  -4   5   10.05    0.24
  -4   4   5   10.70    0.28
  -4   4   5   10.20    0.28
  -4  -4  -5   10.17    0.27
  -4   4  -5   10.09    0.36
  -4  -4   5    9.96    0.28
   4   4   5   10.38    0.28
  -4   4  -5   10.32    0.29
   4   4   5   10.13    0.27
  -5  -4  -5    0.91    0.07
  -5   4   5    0.76    0.07
  -5   4   5    0.82    0.08
  -5  -4   5    0.59    0.06
   5   4   5    0.94    0.07
  -5   4  -5    0.87    0.12
  -5   4  -5    0.82    0.08
   5   4   5    0.55    0.06
  -6  -4  -5    1.15    0.09
  -6   4   5    0.99    0.09
  -6   4   5    1.12    0.09
   6   4   5    1.20    0.07
  -6   4  -5    1.05    0.08
   6   4   5    1.05    0.08
  -6  -4   5    1.05    0.08
  -6   4  -5    0.92    0.13
  -7   4   5    2.41    0.13
  -7   4   5    2.23    0.12
  -7  -4  -5    2.40    0.13
   7   4   5    2.40    0.12
  -7  -4   5    2.56    0.13
  -7   4  -5    2.89    0.20
  -8   4   5   12.86    0.36
  -8   4   5   13.26    0.39
  -8  -4  -5   12.92    0.38
  -8   4  -5   13.03    0.46
  -8  -4   5   12.95    0.38
   8   4   5   12.79    0.37
  -9   4   5    1.34    0.10
  -9   4   5    1.57    0.14
  -9  -4  -5    1.38    0.13
  -9   4  -5    1.82    0.20
  -9  -4   5    1.44    0.14
   9   4   5    1.37    0.12
 -10   4   5    6.50    0.27
 -10  -4  -5    6.54    0.27
 -10   4  -5    6.67    0.33
  10   4   5    6.31    0.25
 -10  -4   5    6.55    0.27
 -11  -4  -5    4.10    0.22
 -11   4   5    4.04    0.23
 -11   4  -5    4.02    0.27
 -11  -4   5    3.90    0.21
 -12  -4  -5    3.17    0.20
 -12   4   5    3.33    0.22
 -12   4  -5    3.76    0.28
 -12  -4   5    3.16    0.20
 -13  -4  -5    1.33    0.16
 -13   4   5    1.42    0.17
 -13   4  -5    1.12    0.20
 -13  -4   5    1.62    0.17
 -14   4   5    0.00    0.08
 -14  -4  -5   -0.05    0.07
 -14  -4   5    0.02    0.07
 -14   4  -5   -0.04    0.11
 -15   4   5    1.13    0.21
   0  -5  -5    0.05    0.01
   0   5  -5    0.04    0.04
   0   5   5    0.09    0.03
   0   5  -5    0.00    0.08
  -1   5   5    1.18    0.08
  -1  -5  -5    1.17    0.05
   1   5   5    1.21    0.08
   1   5   5    1.05    0.06
  -1   5  -5    1.34    0.11
  -1  -5   5    1.10    0.07
  -1   5  -5    1.11    0.14
  -2   5   5    0.32    0.05
  -2  -5  -5    0.30    0.03
  -2   5   5    0.39    0.05
  -2   5  -5    0.24    0.06
   2   5   5    0.28    0.04
  -2  -5   5    0.34    0.05
   2   5   5    0.29    0.05
  -2   5  -5    0.33    0.10
  -3  -5  -5   13.12    0.32
  -3   5   5   13.47    0.35
  -3   5   5   13.49    0.35
   3   5   5   12.88    0.33
   3   5   5   13.59    0.35
  -3  -5   5   12.96    0.34
  -3   5  -5   13.17    0.45
  -3   5  -5   13.40    0.37
  -4  -5  -5   17.66    0.42
  -4   5   5   17.60    0.44
  -4   5   5   17.54    0.44
  -4   5  -5   17.60    0.46
   4   5   5   17.84    0.43
   4   5   5   17.45    0.44
  -4  -5   5   17.27    0.44
  -4   5  -5   17.62    0.55
  -5   5   5    2.68    0.13
  -5  -5  -5    2.93    0.12
  -5   5   5    3.04    0.13
   5   5   5    2.74    0.12
  -5   5  -5    3.09    0.14
  -5   5  -5    2.42    0.18
   5   5   5    2.93    0.13
  -5  -5   5    2.70    0.13
  -6   5   5    4.15    0.16
  -6   5   5    4.13    0.18
  -6  -5  -5    4.13    0.16
  -6  -5   5    4.03    0.17
  -6   5  -5    4.11    0.17
   6   5   5    3.94    0.16
  -6   5  -5    4.15    0.23
   6   5   5    4.13    0.16
  -7   5   5    2.19    0.12
  -7  -5  -5    2.04    0.12
  -7   5   5    2.12    0.13
  -7   5  -5    2.57    0.22
  -7  -5   5    1.85    0.12
   7   5   5    2.04    0.12
  -8   5   5    5.40    0.20
  -8   5   5    5.14    0.23
  -8  -5  -5    5.29    0.21
  -8   5  -5    5.18    0.28
   8   5   5    5.17    0.21
  -8  -5   5    5.31    0.22
  -9  -5  -5    5.04    0.22
  -9   5   5    5.70    0.25
  -9   5   5    5.36    0.21
   9   5   5    4.87    0.21
  -9   5  -5    5.59    0.31
  -9  -5   5    5.34    0.23
 -10  -5  -5    4.37    0.22
 -10   5   5    4.65    0.24
 -10   5  -5    4.17    0.28
  10   5   5    4.13    0.20
 -10  -5   5    4.05    0.21
 -11  -5  -5    3.87    0.21
 -11   5   5    4.17    0.24
 -11   5  -5    4.02    0.28
 -11  -5   5    4.40    0.22
 -12   5   5    1.95    0.21
 -12  -5  -5    1.86    0.18
 -12   5  -5    1.64    0.22
 -12  -5   5    1.40    0.16
 -13   5   5    0.17    0.10
 -13  -5  -5    0.17    0.09
 -13   5  -5    0.08    0.11
 -13  -5   5    0.14    0.09
 -14  -5  -5    1.08    0.16
 -14   5   5    0.97    0.17
 -14   5  -5    0.89    0.20
 -14  -5   5    0.97    0.17
   0   6  -5    5.21    0.28
   0   6   5    4.86    0.18
   0   6  -5    4.65    0.21
   0  -6  -5    4.76    0.12
  -1  -6  -5    1.48    0.06
  -1   6   5    1.42    0.09
   1  -6  -5    1.56    0.05
  -1   6  -5    1.63    0.18
   1   6   5    1.70    0.10
   1   6   5    1.54    0.08
  -1  -6   5    1.62    0.08
  -1   6  -5    1.53    0.12
  -2   6   5    0.35    0.06
  -2   6   5    0.45    0.07
  -2  -6  -5    0.49    0.04
   2   6   5    0.49    0.07
  -2   6  -5    0.45    0.12
   2   6   5    0.41    0.05
  -2  -6   5    0.44    0.05
  -2   6  -5    0.42    0.07
  -3  -6  -5    2.87    0.10
  -3   6   5    2.84    0.14
  -3   6   5    2.79    0.13
  -3   6  -5    3.24    0.22
  -3   6  -5    2.86    0.15
  -3  -6   5    2.76    0.12
   3   6   5    2.64    0.13
   3   6   5    2.76    0.11
  -4   6   5    3.42    0.15
  -4  -6  -5    3.96    0.14
  -4   6   5    3.91    0.17
  -4   6  -5    3.58    0.23
   4   6   5    3.76    0.16
  -4  -6   5    3.51    0.14
   4   6   5    3.78    0.14
  -4   6  -5    3.94    0.18
  -5   6   5    4.69    0.18
  -5  -6  -5    4.27    0.16
  -5   6   5    4.09    0.18
   5   6   5    4.51    0.18
  -5   6  -5    4.79    0.26
  -5   6  -5    4.13    0.19
  -5  -6   5    4.47    0.17
   5   6   5    4.27    0.17
  -6   6   5   17.15    0.48
  -6  -6  -5   17.04    0.44
  -6   6   5   17.33    0.46
  -6  -6   5   17.30    0.46
  -6   6  -5   16.84    0.57
  -6   6  -5   16.97    0.47
   6   6   5   17.52    0.45
   6   6   5   17.01    0.45
  -7   6   5    0.05    0.06
  -7   6   5    0.08    0.05
  -7  -6  -5   -0.02    0.04
   7   6   5    0.04    0.05
  -7  -6   5   -0.01    0.03
  -7   6  -5   -0.03    0.08
  -8   6   5    1.64    0.12
  -8  -6  -5    1.58    0.12
  -8   6   5    1.53    0.14
   8   6   5    1.65    0.12
  -8   6  -5    1.61    0.20
  -8  -6   5    1.56    0.12
  -9  -6  -5    0.39    0.08
  -9   6   5    0.20    0.06
  -9   6   5    0.49    0.10
  -9  -6   5    0.48    0.09
   9   6   5    0.52    0.08
  -9   6  -5    0.34    0.13
 -10   6   5    0.16    0.09
 -10  -6  -5    0.06    0.06
 -10   6   5    0.01    0.05
 -10   6  -5    0.02    0.10
 -10  -6   5    0.09    0.06
  10   6   5    0.07    0.06
 -11   6   5    1.08    0.16
 -11  -6  -5    1.30    0.14
 -11   6  -5    1.06    0.18
 -11  -6   5    1.19    0.14
 -12   6   5    0.39    0.12
 -12  -6  -5    0.15    0.07
 -12   6  -5    0.25    0.14
 -12  -6   5    0.30    0.10
 -13   6   5    0.47    0.13
 -13  -6  -5    0.32    0.11
 -13  -6   5    0.38    0.11
 -13   6  -5    0.29    0.13
 -14  -6  -5    1.18    0.16
   0  -7  -5    0.01    0.02
   0   7   5    0.01    0.03
   0   7   5    0.05    0.04
   0  -7   5    0.04    0.03
   0   7  -5   -0.01    0.06
  -1  -7  -5    0.05    0.02
  -1   7   5    0.02    0.04
   1   7  -5    0.10    0.06
   1   7   5    0.07    0.04
  -1   7  -5    0.11    0.07
  -1   7  -5    0.10    0.09
  -1  -7   5    0.04    0.03
   1   7   5    0.05    0.03
   1  -7  -5    0.07    0.02
  -2   7   5    0.27    0.06
  -2   7   5    0.22    0.06
   2   7   5    0.25    0.04
   2   7   5    0.20    0.05
  -2   7  -5    0.25    0.11
  -2   7  -5    0.21    0.07
  -2  -7   5    0.18    0.04
  -3   7   5    0.82    0.10
  -3   7   5    0.83    0.09
  -3  -7  -5    0.78    0.06
   3   7   5    0.82    0.09
  -3   7  -5    0.75    0.15
  -3  -7   5    0.77    0.08
   3   7   5    0.85    0.07
  -3   7  -5    0.92    0.11
  -4  -7  -5    6.07    0.19
  -4   7   5    6.27    0.22
  -4   7   5    5.59    0.23
  -4  -7   5    5.70    0.20
   4   7   5    5.49    0.21
  -4   7  -5    6.36    0.25
  -4   7  -5    6.21    0.32
   4   7   5    5.57    0.19
  -5   7   5    0.15    0.07
  -5   7   5    0.12    0.05
  -5  -7  -5    0.10    0.04
   5   7   5    0.20    0.06
   5   7   5    0.15    0.05
  -5   7  -5    0.14    0.07
  -5   7  -5    0.16    0.11
  -5  -7   5    0.18    0.05
  -6   7   5    4.70    0.20
  -6   7   5    4.69    0.22
  -6  -7  -5    5.09    0.19
   6   7   5    5.10    0.19
  -6   7  -5    4.86    0.22
   6   7   5    4.83    0.20
  -6  -7   5    5.13    0.20
  -7  -7  -5   -0.01    0.04
  -7   7   5   -0.01    0.04
  -7   7   5   -0.11    0.06
   7   7   5   -0.01    0.04
  -7  -7   5   -0.02    0.04
  -7   7  -5    0.08    0.11
  -8   7   5   13.94    0.41
  -8  -7  -5   13.93    0.40
  -8   7   5   13.31    0.49
   8   7   5   13.83    0.40
  -8  -7   5   13.29    0.41
  -8   7  -5   13.53    0.54
  -9   7   5    6.56    0.25
  -9  -7  -5    6.46    0.26
  -9   7  -5    6.03    0.35
   9   7   5    6.30    0.25
  -9  -7   5    6.13    0.26
 -10   7   5    3.95    0.21
 -10  -7  -5    3.92    0.20
 -10   7  -5    3.84    0.29
  10   7   5    4.50    0.22
 -10  -7   5    3.92    0.21
 -11  -7  -5    3.54    0.21
 -11   7  -5    3.29    0.32
 -11  -7   5    3.77    0.22
 -12  -7  -5    0.04    0.07
 -12  -7   5    0.09    0.07
 -12   7  -5    0.07    0.12
 -13  -7  -5    1.93    0.19
 -13  -7   5    1.99    0.20
 -13   7  -5    1.93    0.28
 -14  -7  -5    4.29    0.31
   0   8   5   14.10    0.40
   0   8  -5   12.98    0.43
   0   8   5   13.09    0.33
   0  -8   5   12.98    0.35
  -1   8   5   14.41    0.42
   1   8  -5   14.31    0.46
  -1   8  -5   15.66    0.57
  -1  -8   5   15.05    0.39
   1   8   5   14.82    0.37
  -1   8  -5   14.02    0.46
   1   8   5   15.38    0.43
  -2   8   5   23.94    0.62
   2   8   5   24.06    0.57
  -2  -8   5   24.67    0.59
  -2   8  -5   24.17    0.66
  -2   8  -5   23.51    0.77
   2   8   5   24.20    0.63
  -3   8   5    8.44    0.29
  -3   8  -5    8.19    0.31
  -3   8  -5    9.37    0.43
   3   8   5    8.26    0.29
   3   8   5    8.39    0.25
  -3  -8   5    8.80    0.27
  -4   8   5   11.40    0.35
  -4   8  -5   11.91    0.49
  -4  -8   5   10.78    0.33
   4   8   5   11.20    0.32
   4   8   5   11.34    0.36
  -4   8  -5   11.14    0.38
  -5   8   5    0.88    0.11
   5   8   5    1.22    0.12
  -5   8  -5    0.97    0.17
   5   8   5    1.18    0.10
  -5   8  -5    1.02    0.12
  -5  -8   5    1.09    0.10
  -6   8   5   18.42    0.52
  -6  -8  -5   18.03    0.51
   6   8   5   19.55    0.54
  -6   8  -5   19.64    0.55
   6   8   5   19.26    0.50
  -6  -8   5   18.74    0.51
  -6   8  -5   19.29    0.67
  -7   8   5    2.47    0.16
  -7  -8  -5    2.76    0.14
  -7  -8   5    2.49    0.15
  -7   8  -5    2.32    0.18
   7   8   5    2.74    0.15
  -7   8  -5    2.76    0.28
  -8   8   5    6.04    0.25
  -8  -8  -5    5.48    0.23
   8   8   5    5.94    0.24
  -8  -8   5    5.81    0.24
  -8   8  -5    5.52    0.35
  -9  -8  -5    7.01    0.28
  -9   8   5    7.35    0.29
  -9   8  -5    8.04    0.42
   9   8   5    7.64    0.29
  -9  -8   5    7.45    0.30
 -10   8   5    0.19    0.07
 -10  -8  -5    0.37    0.08
  10   8   5    0.31    0.08
 -10  -8   5    0.29    0.09
 -10   8  -5    0.25    0.15
 -11  -8  -5   -0.02    0.06
 -11  -8   5   -0.04    0.05
 -11   8  -5   -0.09    0.10
 -12  -8  -5    0.55    0.15
 -12  -8   5    0.40    0.11
 -12   8  -5    0.74    0.19
   0  -9   5    0.03    0.04
   0   9   5   -0.02    0.05
   0   9   5   -0.02    0.03
   0   9  -5   -0.02    0.06
   1   9  -5    0.02    0.07
  -1   9   5    0.13    0.06
   1   9   5    0.00    0.03
  -1  -9   5    0.05    0.04
  -1   9  -5   -0.05    0.05
  -1   9  -5   -0.06    0.09
   1   9   5    0.00    0.05
  -2   9   5    1.40    0.13
  -2   9  -5    1.20    0.20
  -2  -9   5    1.36    0.10
  -2   9  -5    1.17    0.14
   2   9   5    1.39    0.09
   2   9   5    1.37    0.14
  -3   9   5    2.23    0.15
  -3   9  -5    2.39    0.18
   3   9   5    2.12    0.11
   3   9   5    1.90    0.15
  -3  -9   5    2.25    0.12
  -3   9  -5    2.57    0.28
  -4   9   5    1.97    0.17
  -4  -9   5    1.61    0.11
  -4   9  -5    1.98    0.25
   4   9   5    1.74    0.15
  -4   9  -5    1.87    0.18
   4   9   5    1.97    0.11
  -5   9   5    6.02    0.26
   5   9   5    5.89    0.26
  -5   9  -5    5.31    0.36
   5   9   5    5.96    0.21
  -5   9  -5    6.04    0.27
  -5  -9   5    5.45    0.22
  -6   9   5    5.93    0.26
   6   9   5    6.21    0.23
  -6  -9   5    6.09    0.24
   6   9   5    5.95    0.30
  -6   9  -5    6.36    0.28
  -6   9  -5    6.15    0.37
  -7   9   5    5.84    0.26
  -7  -9   5    5.35    0.23
   7   9   5    5.97    0.23
  -7   9  -5    5.99    0.37
  -7   9  -5    5.46    0.26
  -8   9   5   19.05    0.55
   8   9   5   17.96    0.51
  -8  -9   5   17.53    0.52
  -8   9  -5   17.55    0.69
  -9   9   5    1.87    0.17
  -9  -9   5    1.44    0.14
   9   9   5    1.70    0.15
  -9   9  -5    1.59    0.24
 -10   9   5    0.00    0.07
 -10  -9   5    0.04    0.07
  10   9   5    0.07    0.06
 -10   9  -5    0.00    0.13
 -11  -9   5    1.34    0.16
 -11   9  -5    1.13    0.22
 -12  -9   5    0.60    0.12
 -12   9  -5    0.78    0.20
   0 -10   5    7.23    0.24
   0  10   5    6.91    0.29
   0  10  -5    7.13    0.32
   1  10  -5    9.34    0.39
   1 -10   5   10.11    0.30
  -1  10   5   10.59    0.37
  -1 -10   5   10.30    0.31
   1  10   5    9.48    0.35
  -1  10  -5   10.04    0.39
  -2  10   5    7.91    0.31
   2  10  -5    8.38    0.35
   2  10   5    7.58    0.31
  -2  10  -5    7.23    0.33
  -2  10  -5    7.93    0.43
  -2 -10   5    8.07    0.26
  -3  10   5    0.35    0.09
  -3  10  -5    0.28    0.10
   3  10   5    0.25    0.09
  -3 -10   5    0.22    0.06
  -3  10  -5    0.17    0.13
   3  10   5    0.34    0.06
  -4  10   5    0.38    0.09
   4  10   5    0.53    0.07
   4  10   5    0.55    0.11
  -4  10  -5    0.60    0.11
  -4  10  -5    0.64    0.17
  -4 -10   5    0.52    0.08
  -5  10   5    0.13    0.07
   5  10   5    0.07    0.05
   5  10   5    0.13    0.08
  -5  10  -5   -0.03    0.13
  -5  10  -5    0.06    0.07
  -5 -10   5    0.06    0.05
  -6  10   5    5.07    0.25
   6  10   5    5.00    0.21
  -6  10  -5    5.67    0.37
  -6  10  -5    5.95    0.28
  -6 -10   5    4.84    0.22
  -7  10   5    0.66    0.12
  -7  10  -5    0.86    0.13
  -7 -10   5    0.63    0.10
  -7  10  -5    1.04    0.22
   7  10   5    0.74    0.10
  -8  10   5    0.07    0.07
   8  10   5    0.07    0.06
  -8  10  -5    0.01    0.12
  -8 -10   5   -0.07    0.04
  -9  10   5    3.69    0.22
   9  10   5    4.15    0.21
  -9  10  -5    4.66    0.37
  -9 -10   5    4.00    0.22
 -10  10   5    0.16    0.13
  10  10   5    0.27    0.09
 -10  10  -5    0.16    0.16
 -10 -10   5    0.37    0.09
 -11 -10   5    0.30    0.10
 -11  10  -5    0.03    0.15
   0  11  -5   -0.09    0.06
   0 -11   5    0.02    0.05
   0  11   5   -0.09    0.07
   1  11  -5    2.82    0.24
   1 -11   5    2.27    0.13
  -1  11   5    1.95    0.18
  -1 -11   5    2.22    0.13
  -1  11  -5    1.99    0.20
   1  11   5    1.92    0.18
  -2  11   5    5.41    0.27
   2  11  -5    5.24    0.30
   2  11   5    5.54    0.27
  -2  11  -5    5.93    0.30
  -2 -11   5    5.65    0.22
  -3  11   5   -0.04    0.06
  -3 -11   5    0.02    0.05
   3  11   5   -0.09    0.06
  -3  11  -5   -0.07    0.07
  -3  11  -5    0.10    0.14
  -4  11   5    4.57    0.25
  -4 -11   5    4.71    0.20
  -4  11  -5    4.54    0.36
  -4  11  -5    4.50    0.26
   4  11   5    4.68    0.26
  -5  11   5    0.57    0.12
  -5  11  -5    0.77    0.20
  -5  11  -5    0.58    0.12
   5  11   5    0.42    0.10
  -5 -11   5    0.65    0.09
  -6  11   5    4.52    0.24
  -6 -11   5    4.54    0.21
  -6  11  -5    4.14    0.25
  -6  11  -5    3.37    0.35
  -7  11   5    2.42    0.21
  -7  11  -5    2.43    0.22
  -7 -11   5    2.01    0.16
  -7  11  -5    2.60    0.33
   7  11   5    2.43    0.15
  -8  11   5    1.26    0.16
   8  11   5    0.91    0.12
  -8  11  -5    0.73    0.21
  -8 -11   5    0.80    0.12
  -9  11   5   -0.08    0.06
  -9 -11   5    0.11    0.07
  -9  11  -5    0.20    0.17
   9  11   5    0.04    0.06
 -10  11  -5   -0.23    0.13
 -10 -11   5   -0.01    0.07
   0  12   5    4.46    0.26
   0 -12   5    5.09    0.21
   0  12  -5    4.70    0.28
  -1  12   5    0.88    0.14
   1  12  -5    0.79    0.15
   1 -12   5    0.95    0.10
  -1 -12   5    0.81    0.09
  -1  12  -5    0.78    0.14
   1  12   5    0.84    0.14
   2  12  -5    4.39    0.27
  -2  12   5    4.26    0.25
   2 -12   5    3.85    0.18
   2  12   5    3.89    0.24
  -2 -12   5    3.81    0.18
  -2  12  -5    4.14    0.26
  -3  12   5    3.80    0.24
   3  12   5    3.64    0.24
  -3 -12   5    3.57    0.18
  -3  12  -5    3.80    0.26
  -3  12  -5    2.91    0.33
  -4  12   5    0.04    0.08
  -4  12  -5    0.21    0.16
  -4 -12   5    0.08    0.06
   4  12   5    0.10    0.09
  -4  12  -5    0.11    0.09
  -5  12   5    5.95    0.30
  -5 -12   5    5.90    0.25
  -5  12  -5    5.99    0.32
  -5  12  -5    5.49    0.42
   5  12   5    6.09    0.30
  -6  12   5    0.12    0.09
  -6 -12   5    0.13    0.06
  -6  12  -5    0.07    0.09
  -6  12  -5   -0.06    0.14
  -7  12   5    0.30    0.11
  -7  12  -5    0.20    0.11
  -7 -12   5    0.30    0.08
  -7  12  -5    0.26    0.19
  -8  12   5    0.79    0.14
  -8  12  -5    0.85    0.23
  -8 -12   5    1.13    0.14
  -9  12   5    1.51    0.19
  -9  12  -5    1.50    0.29
  -9 -12   5    1.69    0.17
 -10  12  -5   -0.02    0.18
   0  13  -5    0.05    0.10
   0 -13   5   -0.10    0.04
   0  13   5    0.10    0.09
   1 -13   5    0.15    0.06
   1  13  -5    0.27    0.12
  -1  13   5    0.17    0.09
  -1  13  -5    0.05    0.09
  -1 -13   5    0.08    0.05
   1  13   5    0.08    0.09
  -2  13   5    0.79    0.14
   2 -13   5    0.57    0.08
   2  13   5    0.45    0.12
  -2 -13   5    0.66    0.09
  -2  13  -5    0.65    0.15
  -3  13   5    0.52    0.13
  -3  13  -5    0.68    0.15
   3  13   5    0.70    0.14
  -3 -13   5    0.57    0.09
  -4  13   5    3.52    0.25
  -4  13  -5    3.79    0.28
   4  13   5    3.75    0.26
  -4 -13   5    3.85    0.20
  -4  13  -5    3.58    0.39
  -5  13   5    0.10    0.10
   5  13   5    0.01    0.09
  -5  13  -5   -0.06    0.12
  -5 -13   5    0.07    0.06
  -5  13  -5    0.03    0.09
  -6  13   5    5.10    0.30
  -6  13  -5    5.15    0.31
  -6 -13   5    5.10    0.24
  -6  13  -5    5.75    0.45
  -7  13   5    0.00    0.08
  -7  13  -5    0.25    0.19
  -7 -13   5    0.07    0.07
  -8  13   5    0.15    0.11
  -8  13  -5    0.45    0.19
  -8 -13   5    0.13    0.08
   0 -14   5    9.84    0.33
   0  14   5    9.34    0.42
   0  14  -5    9.82    0.47
   1 -14   5    3.75    0.19
  -1  14   5    3.48    0.26
   1  14  -5    3.58    0.28
   1  14   5    4.55    0.29
  -1 -14   5    3.87    0.20
  -1  14  -5    2.92    0.28
   2 -14   5    1.36    0.13
  -2  14   5    1.28    0.18
  -2  14  -5    1.47    0.21
  -2 -14   5    1.25    0.13
   2  14   5    1.31    0.19
  -3  14   5    1.23    0.19
   3 -14   5    1.37    0.13
   3  14   5    0.95    0.16
  -3  14  -5    1.13    0.19
  -3 -14   5    1.32    0.14
  -4  14   5    0.13    0.11
   4  14   5    0.40    0.13
  -4  14  -5    0.47    0.13
  -4 -14   5    0.27    0.08
  -5  14   5    0.19    0.12
  -5 -14   5    0.15    0.07
  -5  14  -5    0.17    0.28
   5  14   5    0.19    0.12
  -5  14  -5    0.18    0.11
  -6 -14   5    7.80    0.32
  -6  14  -5    7.49    0.39
  -7 -14   5    1.17    0.14
   0  15   5   -0.06    0.09
   1  15   5    0.25    0.13
   2  15   5    0.13    0.11
   3  15   5    1.33    0.20
   4  15   5    1.36    0.20
   5  15   5    0.72    0.26
   0   0  -6  121.01    2.56
  -1   0   6    7.97    0.19
  -1   0  -6    7.96    0.24
  -2   0  -6   69.76    1.51
  -2   0   6   70.38    1.46
   2   0   6   69.43    1.47
  -3   0  -6   32.90    0.76
   3   0   6   33.19    0.72
  -3   0   6   32.33    0.72
   3   0   6   33.88    0.70
  -4   0   6   32.30    0.71
   4   0   6   32.07    0.67
  -4   0  -6   31.12    0.75
  -4   0   6   31.58    0.73
   4   0   6   31.89    0.70
  -5   0   6   10.49    0.29
   5   0   6   10.70    0.27
  -5   0  -6   10.07    0.31
  -5   0   6   10.18    0.28
  -6   0   6    9.35    0.27
   6   0   6    9.48    0.26
  -6   0   6    9.09    0.27
  -6   0  -6    8.94    0.30
   7   0   6    0.00    0.03
  -7   0  -6    0.02    0.04
  -7   0   6    0.05    0.04
  -7   0   6    0.05    0.04
  -8   0   6    6.96    0.23
  -8   0  -6    6.94    0.27
  -8   0   6    6.70    0.24
   8   0   6    6.72    0.23
   9   0   6   14.38    0.40
  -9   0  -6   14.85    0.46
  -9   0   6   14.02    0.42
  -9   0   6   14.47    0.39
 -10   0   6    1.42    0.16
 -10   0  -6    1.07    0.13
 -10   0   6    1.46    0.14
 -11   0   6    0.50    0.10
 -11   0  -6    0.45    0.10
 -12   0  -6    2.42    0.22
 -12   0   6    2.31    0.17
 -13   0   6   -0.01    0.06
 -13   0  -6    0.00    0.07
 -14   0  -6    2.76    0.26
 -14   0   6    3.25    0.22
 -15   0   6    5.74    0.35
   0   1   6    0.00    0.02
   0   1  -6   -0.07    0.04
   0  -1  -6    0.00    0.03
  -1  -1  -6   42.81    0.92
  -1   1   6   42.43    0.88
  -1   1   6   42.56    0.92
  -1   1  -6   40.75    0.97
   1   1   6   42.29    0.90
  -1  -1   6   41.91    0.90
   2  -1   6    8.66    0.21
  -2   1   6    8.89    0.21
  -2  -1  -6    8.71    0.24
   2   1   6    8.52    0.21
   2   1   6    8.78    0.22
  -2  -1   6    8.67    0.22
  -2   1  -6    7.93    0.27
  -3  -1  -6    0.38    0.05
  -3   1   6    0.46    0.05
   3  -1   6    0.54    0.04
  -3   1   6    0.50    0.04
  -3  -1   6    0.55    0.04
   3   1   6    0.52    0.03
   3   1   6    0.42    0.04
  -3   1  -6    0.51    0.08
   4  -1   6   23.03    0.52
  -4   1   6   23.58    0.55
  -4  -1  -6   22.83    0.56
  -4   1   6   23.19    0.53
   4   1   6   23.95    0.49
   4   1   6   24.12    0.54
  -4  -1   6   23.13    0.54
  -4   1  -6   22.27    0.59
   5  -1   6   25.05    0.57
  -5  -1  -6   24.36    0.60
  -5   1   6   24.82    0.59
  -5   1   6   24.98    0.58
  -5   1  -6   24.73    0.63
   5   1   6   25.42    0.58
  -5  -1   6   25.22    0.58
  -6   1   6    0.12    0.04
   6  -1   6    0.10    0.03
  -6  -1  -6    0.14    0.05
  -6   1   6    0.14    0.04
  -6  -1   6    0.08    0.03
   6   1   6    0.10    0.04
  -6   1  -6    0.09    0.06
  -7   1   6    5.72    0.20
   7  -1   6    5.80    0.19
  -7   1   6    5.75    0.20
  -7  -1  -6    5.54    0.22
  -7  -1   6    5.50    0.20
   7   1   6    6.04    0.20
  -7   1  -6    5.86    0.25
  -8   1   6    4.23    0.18
   8  -1   6    4.04    0.16
  -8  -1  -6    3.99    0.20
  -8   1   6    4.41    0.17
  -8  -1   6    4.44    0.18
  -8  -1   6    4.23    0.17
  -8   1  -6    3.93    0.21
   8   1   6    4.45    0.17
   9  -1   6    2.02    0.12
  -9   1   6    1.72    0.11
  -9  -1  -6    1.96    0.14
  -9   1   6    1.68    0.12
  -9  -1   6    1.95    0.13
  -9  -1   6    1.75    0.11
  -9   1  -6    1.55    0.16
   9   1   6    1.81    0.11
 -10   1   6   15.77    0.47
 -10  -1  -6   15.62    0.50
 -10   1   6   15.97    0.43
  10   1   6   16.66    0.46
 -10   1  -6   16.23    0.53
 -10  -1   6   16.12    0.47
 -11  -1  -6    3.55    0.21
 -11   1   6    3.72    0.20
 -11  -1   6    3.58    0.20
 -11   1  -6    3.37    0.23
 -12   1   6    0.09    0.07
 -12  -1  -6    0.14    0.08
 -12  -1   6    0.29    0.09
 -12   1  -6    0.14    0.09
 -13  -1  -6    0.76    0.14
 -13   1   6    0.79    0.13
 -13   1  -6    0.58    0.13
 -13  -1   6    0.64    0.11
 -14   1   6    0.58    0.12
 -14  -1  -6    0.30    0.12
 -14  -1   6    0.38    0.11
 -14   1  -6    0.56    0.14
 -15   1   6    0.25    0.11
   0   2   6  262.38    5.99
   0   2   6  291.61    5.85
   0   2  -6  273.53    5.78
  -1  -2  -6   34.35    0.73
  -1   2   6   34.02    0.71
  -1   2   6   34.41    0.75
  -1  -2   6   34.04    0.74
  -1   2  -6   33.04    0.83
   1   2   6   33.34    0.73
   2  -2   6    0.08    0.02
  -2   2   6    0.10    0.02
  -2   2   6    0.06    0.03
  -2  -2  -6    0.09    0.03
  -2  -2   6    0.09    0.02
   2   2   6    0.08    0.02
   2   2   6    0.11    0.03
  -2   2  -6    0.08    0.05
  -3  -2  -6    6.39    0.18
   3  -2   6    6.12    0.16
  -3   2   6    6.00    0.19
  -3   2   6    6.38    0.17
   3   2   6    6.16    0.18
  -3  -2   6    6.40    0.18
   3   2   6    6.41    0.16
  -3   2  -6    6.23    0.24
   4  -2   6    6.08    0.17
  -4   2   6    6.25    0.18
  -4  -2  -6    6.50    0.20
  -4   2   6    6.29    0.20
   4   2   6    6.11    0.19
   4   2   6    6.50    0.16
  -4  -2   6    6.43    0.19
  -4   2  -6    6.45    0.25
  -5   2   6   22.93    0.56
  -5  -2  -6   23.85    0.57
   5  -2   6   23.77    0.54
  -5   2   6   23.62    0.55
  -5   2  -6   24.21    0.63
   5   2   6   23.64    0.51
   5   2   6   23.46    0.56
  -5  -2   6   24.07    0.56
  -6   2   6   -0.05    0.02
  -6  -2  -6    0.00    0.04
   6  -2   6    0.01    0.02
  -6   2   6   -0.02    0.03
   6   2   6    0.00    0.03
  -6   2  -6    0.01    0.06
  -6  -2   6    0.03    0.03
  -7   2   6    4.67    0.17
   7  -2   6    4.45    0.16
  -7  -2  -6    4.40    0.19
  -7   2   6    4.50    0.17
  -7  -2   6    4.10    0.17
   7   2   6    4.76    0.17
  -7   2  -6    4.40    0.22
  -8  -2  -6    5.71    0.23
  -8   2   6    5.80    0.22
   8  -2   6    5.75    0.20
  -8   2   6    5.77    0.20
   8   2   6    5.56    0.21
  -8   2  -6    6.01    0.27
  -8  -2   6    5.83    0.22
  -9  -2  -6    0.46    0.09
  -9   2   6    0.56    0.09
  -9   2   6    0.50    0.07
  -9   2  -6    0.65    0.12
   9   2   6    0.52    0.08
  -9  -2   6    0.43    0.08
 -10   2   6    3.07    0.18
 -10  -2  -6    3.13    0.19
 -10   2   6    2.94    0.14
  10   2   6    3.23    0.17
 -10  -2   6    3.14    0.18
 -10   2  -6    3.13    0.22
 -11  -2  -6    2.52    0.19
 -11   2   6    2.84    0.18
 -11   2  -6    2.82    0.22
 -11  -2   6    2.99    0.18
 -12   2   6    0.10    0.07
 -12  -2  -6    0.06    0.07
 -12  -2   6    0.16    0.07
 -12   2  -6   -0.08    0.07
 -13   2   6    1.54    0.17
 -13  -2  -6    1.78    0.20
 -13   2  -6    1.58    0.21
 -13  -2   6    1.70    0.18
 -14   2   6    1.24    0.17
 -14  -2  -6    1.26    0.18
 -14  -2   6    1.45    0.17
 -14   2  -6    1.15    0.19
 -15   2   6    0.07    0.09
   0   3  -6    0.01    0.06
   0   3   6    0.03    0.02
  -1  -3  -6    3.55    0.10
  -1   3   6    3.90    0.13
  -1   3  -6    3.76    0.20
  -1  -3   6    3.87    0.12
   1   3   6    3.87    0.12
  -2   3   6    0.51    0.03
  -2   3   6    0.45    0.05
  -2  -3  -6    0.47    0.04
   2  -3   6    0.50    0.03
   2   3   6    0.46    0.04
  -2  -3   6    0.57    0.05
  -2   3  -6    0.49    0.09
   2   3   6    0.38    0.05
  -3   3   6   62.44    1.37
   3  -3   6   65.40    1.36
  -3   3   6   66.34    1.41
  -3  -3  -6   65.42    1.38
  -3  -3   6   66.93    1.40
   3   3   6   65.68    1.38
  -3   3  -6   64.47    1.50
   3   3   6   65.20    1.39
  -4   3   6   13.46    0.33
  -4  -3  -6   13.25    0.33
   4  -3   6   13.12    0.31
  -4   3   6   13.21    0.34
  -4  -3   6   13.14    0.34
  -4   3  -6   13.23    0.42
   4   3   6   12.91    0.33
   4   3   6   13.12    0.31
  -5  -3  -6    0.31    0.05
  -5   3   6    0.25    0.04
  -5   3   6    0.39    0.06
   5  -3   6    0.30    0.04
   5   3   6    0.27    0.03
  -5   3  -6    0.30    0.08
  -5  -3   6    0.29    0.05
   5   3   6    0.26    0.05
  -6   3   6    2.33    0.11
  -6  -3  -6    2.14    0.12
  -6   3   6    2.25    0.11
   6  -3   6    2.40    0.10
   6   3   6    2.29    0.11
  -6   3  -6    2.32    0.17
  -6  -3   6    2.24    0.12
   7  -3   6    1.93    0.10
  -7  -3  -6    1.83    0.12
  -7   3   6    1.85    0.11
  -7   3   6    1.80    0.11
  -7  -3   6    1.82    0.11
  -7   3  -6    1.98    0.16
   7   3   6    1.97    0.11
  -8   3   6    3.61    0.15
  -8  -3  -6    3.29    0.17
  -8   3   6    3.50    0.16
  -8  -3   6    3.30    0.16
   8   3   6    3.44    0.16
  -8   3  -6    3.25    0.21
  -9   3   6    2.02    0.12
  -9   3   6    2.21    0.14
  -9  -3  -6    2.16    0.14
  -9  -3   6    2.01    0.14
   9   3   6    2.02    0.13
  -9   3  -6    2.03    0.20
 -10   3   6   10.04    0.30
 -10   3   6   10.17    0.35
 -10  -3  -6    9.49    0.35
  10   3   6    9.73    0.33
 -10  -3   6   10.30    0.35
 -10   3  -6    9.61    0.41
 -11   3   6    9.62    0.35
 -11  -3  -6    9.52    0.36
  11   3   6    9.48    0.33
 -11  -3   6    9.43    0.35
 -11   3  -6    9.37    0.41
 -12  -3  -6    2.86    0.20
 -12   3   6    2.25    0.18
 -12   3  -6    2.22    0.23
 -12  -3   6    2.71    0.18
 -13  -3  -6    2.84    0.21
 -13   3   6    2.38    0.19
 -13   3  -6    2.90    0.28
 -13  -3   6    2.67    0.20
 -14   3   6    4.74    0.28
 -14  -3  -6    4.75    0.29
 -14  -3   6    4.85    0.28
 -14   3  -6    4.40    0.32
 -15   3   6    0.63    0.14
   0   4   6  126.75    2.66
   0   4  -6  127.11    2.81
  -1   4   6   66.30    1.42
  -1  -4  -6   66.09    1.37
  -1   4  -6   65.66    1.55
   1   4   6   65.90    1.41
  -1  -4   6   66.65    1.41
  -2   4   6    6.80    0.18
   2  -4   6    6.99    0.16
  -2  -4  -6    6.95    0.17
  -2   4   6    6.81    0.21
  -2  -4   6    6.59    0.20
  -2   4  -6    7.34    0.31
   2   4   6    6.77    0.20
   2   4   6    6.83    0.20
   3  -4   6   10.62    0.24
  -3  -4  -6   10.56    0.26
  -3   4   6   10.18    0.29
  -3   4   6   10.35    0.26
   3   4   6   10.31    0.28
  -3   4  -6   11.03    0.39
  -3  -4   6   10.00    0.28
   3   4   6   10.94    0.27
  -4  -4  -6    8.82    0.24
  -4   4   6    8.69    0.24
  -4   4   6    8.56    0.25
   4  -4   6    8.34    0.21
  -4   4  -6    8.36    0.26
  -4   4  -6    8.52    0.33
   4   4   6    8.42    0.24
  -4  -4   6    8.64    0.25
   4   4   6    8.52    0.23
  -5   4   6   16.99    0.44
  -5  -4  -6   18.01    0.44
   5  -4   6   17.44    0.40
  -5   4   6   17.88    0.44
   5   4   6   17.79    0.42
  -5   4  -6   17.07    0.54
  -5   4  -6   17.48    0.45
   5   4   6   17.22    0.44
  -5  -4   6   17.32    0.44
  -6   4   6   14.82    0.40
  -6   4   6   14.98    0.40
   6  -4   6   15.20    0.36
  -6  -4  -6   14.95    0.40
  -6  -4   6   14.83    0.40
  -6   4  -6   15.15    0.49
   6   4   6   14.17    0.39
  -6   4  -6   14.96    0.39
  -7   4   6    0.01    0.04
  -7  -4  -6    0.12    0.05
  -7   4   6    0.08    0.04
  -7   4  -6    0.11    0.09
  -7  -4   6    0.01    0.04
   7   4   6    0.08    0.04
  -8   4   6    4.23    0.18
  -8  -4  -6    4.40    0.19
  -8   4   6    4.76    0.20
  -8   4  -6    4.61    0.26
  -8  -4   6    4.36    0.19
   8   4   6    4.91    0.19
  -9  -4  -6   21.31    0.60
  -9   4   6   22.62    0.60
  -9   4   6   22.32    0.56
  -9  -4   6   22.23    0.60
  -9   4  -6   21.50    0.69
   9   4   6   23.04    0.59
 -10   4   6    0.14    0.05
 -10   4   6    0.30    0.08
 -10  -4  -6    0.21    0.08
  10   4   6    0.25    0.06
 -10  -4   6    0.27    0.08
 -10   4  -6    0.18    0.10
 -11   4   6    1.90    0.17
 -11  -4  -6    2.10    0.17
 -11   4  -6    2.23    0.24
  11   4   6    2.33    0.16
 -11  -4   6    2.15    0.16
 -12   4   6    0.18    0.08
 -12  -4  -6    0.01    0.06
 -12   4  -6    0.05    0.09
 -12  -4   6    0.14    0.08
 -13   4   6    1.04    0.14
 -13  -4  -6    1.20    0.17
 -13  -4   6    1.06    0.15
 -13   4  -6    1.14    0.19
 -14  -4  -6    0.10    0.09
 -14   4   6    0.06    0.09
 -14  -4   6   -0.01    0.07
 -14   4  -6    0.16    0.13
   0  -5  -6    0.00    0.01
   0   5   6   -0.04    0.03
   0   5  -6   -0.03    0.06
  -1   5   6    5.63    0.18
  -1  -5  -6    5.46    0.14
   1  -5  -6    5.65    0.13
  -1   5  -6    5.88    0.29
   1   5   6    5.63    0.17
  -1  -5   6    5.53    0.17
   1   5   6    5.54    0.18
  -2  -5  -6   14.41    0.33
   2  -5   6   14.31    0.31
  -2   5   6   14.74    0.38
  -2   5   6   14.62    0.35
  -2  -5   6   14.43    0.36
  -2   5  -6   13.94    0.49
  -2   5  -6   13.98    0.40
   2   5   6   14.37    0.36
   2   5   6   14.66    0.37
  -3  -5  -6    0.54    0.05
  -3   5   6    0.59    0.07
   3  -5   6    0.50    0.03
  -3   5   6    0.60    0.06
   3   5   6    0.60    0.06
  -3   5  -6    0.63    0.08
  -3   5  -6    0.52    0.11
  -3  -5   6    0.54    0.06
   3   5   6    0.46    0.06
  -4  -5  -6    7.42    0.21
  -4   5   6    7.45    0.24
  -4   5   6    7.41    0.22
   4   5   6    7.39    0.22
  -4   5  -6    7.34    0.25
  -4   5  -6    7.54    0.33
  -4  -5   6    7.48    0.23
   4   5   6    7.53    0.22
  -5   5   6    0.06    0.04
  -5  -5  -6    0.10    0.04
  -5   5   6    0.06    0.04
  -5  -5   6    0.10    0.04
   5   5   6    0.10    0.04
  -5   5  -6    0.10    0.08
  -5   5  -6    0.14    0.05
   5   5   6    0.05    0.04
  -6   5   6    0.93    0.09
  -6  -5  -6    1.11    0.10
  -6   5   6    1.08    0.10
  -6   5  -6    0.99    0.10
  -6  -5   6    1.12    0.09
   6   5   6    1.23    0.09
  -6   5  -6    0.90    0.14
  -7   5   6    0.90    0.10
  -7   5   6    0.84    0.09
  -7  -5  -6    0.66    0.08
  -7  -5   6    0.67    0.09
  -7   5  -6    0.59    0.12
   7   5   6    0.78    0.08
  -8   5   6    0.06    0.05
  -8  -5  -6   -0.01    0.04
  -8   5   6    0.01    0.05
   8   5   6   -0.03    0.04
  -8   5  -6   -0.03    0.08
  -8  -5   6   -0.01    0.04
  -9   5   6   11.27    0.38
  -9  -5  -6   11.95    0.38
  -9   5   6   11.81    0.35
  -9  -5   6   11.97    0.38
  -9   5  -6   12.41    0.49
   9   5   6   11.64    0.36
 -10   5   6    0.14    0.06
 -10  -5  -6    0.22    0.07
 -10   5   6    0.18    0.08
  10   5   6    0.21    0.07
 -10   5  -6    0.17    0.10
 -10  -5   6    0.18    0.07
 -11  -5  -6    6.40    0.28
 -11   5   6    6.28    0.29
  11   5   6    6.41    0.27
 -11  -5   6    6.72    0.29
 -11   5  -6    5.93    0.36
 -12  -5  -6   -0.01    0.07
 -12   5   6    0.03    0.08
 -12  -5   6    0.14    0.07
 -12   5  -6   -0.12    0.10
 -13  -5  -6    1.24    0.16
 -13   5   6    1.29    0.18
 -13   5  -6    1.23    0.21
 -13  -5   6    1.32    0.16
 -14  -5  -6    2.75    0.22
 -14   5   6    2.83    0.27
   0   6   6    0.29    0.05
   0  -6  -6    0.32    0.02
  -1  -6  -6    9.87    0.23
  -1   6   6    9.99    0.29
   1  -6  -6    9.85    0.22
   1   6   6    9.87    0.29
  -1   6  -6   10.00    0.33
   1   6   6    9.86    0.26
  -1   6  -6    9.36    0.41
  -1  -6   6    9.67    0.27
  -2   6   6    0.21    0.05
  -2  -6  -6    0.28    0.03
  -2   6   6    0.27    0.05
  -2   6  -6    0.23    0.06
   2   6   6    0.32    0.05
  -2   6  -6    0.36    0.11
   2   6   6    0.30    0.05
  -2  -6   6    0.28    0.05
  -3   6   6    4.99    0.19
  -3  -6  -6    5.14    0.15
  -3   6   6    5.16    0.18
  -3  -6   6    5.35    0.18
   3   6   6    5.06    0.17
   3   6   6    5.11    0.19
  -3   6  -6    4.78    0.21
  -3   6  -6    5.41    0.29
  -4   6   6    0.51    0.07
  -4  -6  -6    0.66    0.06
  -4   6   6    0.71    0.08
  -4   6  -6    0.55    0.12
  -4  -6   6    0.65    0.07
  -4   6  -6    0.62    0.09
   4   6   6    0.56    0.07
   4   6   6    0.65    0.07
  -5  -6  -6    7.48    0.23
  -5   6   6    7.72    0.26
  -5   6   6    8.19    0.26
  -5   6  -6    8.19    0.37
  -5  -6   6    7.77    0.25
   5   6   6    7.75    0.24
   5   6   6    7.62    0.25
  -5   6  -6    7.53    0.27
  -6  -6  -6    0.57    0.07
  -6   6   6    0.55    0.08
  -6   6   6    0.57    0.09
  -6  -6   6    0.38    0.06
   6   6   6    0.49    0.07
  -6   6  -6    0.57    0.09
  -6   6  -6    0.45    0.13
  -7   6   6   16.07    0.46
  -7   6   6   16.17    0.44
  -7  -6  -6   15.53    0.43
  -7   6  -6   15.22    0.56
  -7  -6   6   15.40    0.44
   7   6   6   16.16    0.44
  -8   6   6    7.98    0.28
  -8   6   6    8.56    0.31
  -8  -6  -6    7.79    0.28
  -8   6  -6    7.90    0.38
  -8  -6   6    8.21    0.29
   8   6   6    8.26    0.28
  -9   6   6    0.91    0.10
  -9  -6  -6    0.77    0.10
  -9   6   6    0.96    0.13
  -9  -6   6    1.00    0.11
  -9   6  -6    0.86    0.16
   9   6   6    0.83    0.10
 -10   6   6    5.14    0.22
 -10  -6  -6    5.75    0.25
 -10   6   6    5.52    0.28
 -10   6  -6    5.42    0.33
  10   6   6    5.56    0.24
 -10  -6   6    5.10    0.24
 -11  -6  -6    1.32    0.14
 -11  -6   6    1.36    0.15
  11   6   6    1.04    0.13
 -11   6  -6    1.11    0.19
 -12  -6  -6    0.25    0.09
 -12  -6   6    0.25    0.08
 -12   6  -6    0.65    0.17
 -13  -6  -6    0.13    0.09
 -13  -6   6   -0.02    0.06
 -13   6  -6   -0.05    0.11
 -14  -6  -6    0.00    0.09
   0   7  -6    0.03    0.05
   0   7   6    0.01    0.04
   0  -7   6   -0.01    0.03
  -1   7   6    0.45    0.07
  -1   7  -6    0.61    0.10
  -1   7  -6    0.38    0.11
   1   7   6    0.30    0.06
   1   7   6    0.42    0.05
  -1  -7   6    0.42    0.06
  -2   7   6    1.41    0.10
  -2  -7   6    1.28    0.09
  -2   7  -6    1.11    0.17
   2   7   6    1.30    0.08
   2   7   6    1.33    0.10
  -2   7  -6    1.37    0.14
  -3   7   6    6.39    0.23
  -3   7  -6    6.98    0.36
  -3   7  -6    6.17    0.26
  -3  -7   6    6.48    0.21
   3   7   6    6.27    0.20
   3   7   6    6.41    0.23
  -4   7   6   11.16    0.34
  -4  -7  -6   11.34    0.32
  -4   7  -6   12.22    0.38
   4   7   6   11.65    0.32
  -4   7  -6   12.02    0.49
   4   7   6   11.81    0.35
  -4  -7   6   11.26    0.33
  -5  -7  -6   20.73    0.51
  -5   7   6   20.53    0.55
  -5  -7   6   20.67    0.54
  -5   7  -6   22.28    0.59
   5   7   6   21.23    0.55
   5   7   6   21.31    0.53
  -5   7  -6   20.48    0.69
  -6  -7  -6    3.80    0.16
  -6   7   6    3.51    0.17
  -6   7  -6    4.13    0.29
  -6  -7   6    3.59    0.17
   6   7   6    3.59    0.16
  -6   7  -6    4.08    0.20
  -7  -7  -6    1.40    0.11
  -7   7   6    1.46    0.11
  -7   7  -6    1.18    0.18
  -7  -7   6    1.36    0.11
   7   7   6    1.30    0.11
  -8   7   6    0.00    0.05
  -8  -7  -6    0.03    0.04
   8   7   6   -0.03    0.04
  -8  -7   6   -0.05    0.04
  -8   7  -6   -0.08    0.09
  -9   7   6    0.40    0.08
  -9  -7  -6    0.33    0.08
  -9  -7   6    0.42    0.09
   9   7   6    0.52    0.09
  -9   7  -6    0.56    0.16
 -10  -7  -6   -0.08    0.04
 -10   7   6    0.01    0.05
 -10  -7   6    0.06    0.06
  10   7   6    0.04    0.06
 -10   7  -6   -0.02    0.10
 -11  -7  -6   15.05    0.48
 -11  -7   6   15.59    0.50
 -11   7  -6   14.80    0.62
  11   7   6   15.68    0.49
 -12  -7  -6   -0.08    0.06
 -12  -7   6    0.02    0.08
 -12   7  -6    0.04    0.12
 -13  -7  -6    1.07    0.15
 -13   7  -6    0.83    0.21
 -13  -7   6    0.75    0.15
 -14  -7  -6    3.07    0.31
   0  -8   6   12.81    0.35
   0   8   6   12.40    0.33
   0   8  -6   13.52    0.43
   0   8   6   12.83    0.39
  -1   8   6    5.79    0.23
  -1   8  -6    5.47    0.33
  -1  -8   6    5.75    0.20
   1   8   6    5.73    0.18
   1   8   6    5.31    0.22
  -1   8  -6    5.39    0.26
  -2   8   6    1.55    0.12
  -2   8  -6    1.72    0.23
   2   8   6    1.62    0.09
  -2  -8   6    1.59    0.10
  -2   8  -6    1.50    0.15
   2   8   6    1.89    0.12
  -3   8   6    3.57    0.18
  -3  -8   6    3.33    0.15
  -3   8  -6    3.63    0.20
  -3   8  -6    2.88    0.28
   3   8   6    3.49    0.14
   3   8   6    3.51    0.17
  -4   8   6    1.44    0.13
  -4   8  -6    1.36    0.14
   4   8   6    1.48    0.10
  -4  -8   6    1.57    0.10
  -4   8  -6    1.37    0.21
   4   8   6    1.77    0.13
  -5   8   6    0.14    0.06
   5   8   6    0.20    0.06
   5   8   6    0.18    0.06
  -5  -8   6    0.12    0.05
  -5   8  -6    0.15    0.13
  -5   8  -6    0.17    0.07
  -6   8   6    1.72    0.13
  -6  -8   6    1.95    0.13
  -6   8  -6    1.74    0.22
   6   8   6    1.93    0.12
  -6   8  -6    1.79    0.16
  -7   8   6    3.07    0.17
  -7  -8   6    2.73    0.16
  -7   8  -6    2.86    0.28
   7   8   6    3.01    0.16
  -8   8   6    0.14    0.07
  -8   8  -6    0.05    0.11
   8   8   6    0.03    0.05
  -8  -8   6    0.12    0.07
  -9   8   6    2.51    0.17
  -9  -8   6    2.34    0.17
  -9   8  -6    2.73    0.30
   9   8   6    2.43    0.16
 -10   8   6    2.26    0.16
  10   8   6    2.33    0.16
 -10   8  -6    1.81    0.25
 -10  -8   6    2.52    0.17
 -11   8  -6    0.16    0.14
 -11  -8   6    0.15    0.08
  11   8   6    0.23    0.09
 -12  -8   6    0.41    0.10
 -12   8  -6    0.46    0.18
   0  -9   6    0.05    0.04
   0   9   6    0.01    0.03
   0   9  -6    0.04    0.06
   0   9   6   -0.04    0.05
  -1   9   6    9.03    0.32
  -1   9   6    8.87    0.25
  -1   9  -6    9.34    0.36
  -1  -9   6    9.50    0.28
   1   9   6    8.85    0.32
   1   9   6    9.32    0.26
  -1   9  -6    8.58    0.44
  -2   9   6   14.70    0.45
  -2  -9   6   14.66    0.41
   2   9   6   15.47    0.46
   2   9   6   14.77    0.39
  -2   9  -6   15.60    0.50
  -2   9  -6   14.63    0.60
  -3   9   6    1.37    0.14
  -3  -9   6    1.32    0.10
   3   9   6    1.64    0.10
  -3   9  -6    1.64    0.16
  -3   9  -6    1.27    0.21
   3   9   6    1.29    0.13
  -4   9   6    9.05    0.33
  -4  -9   6    9.65    0.30
  -4   9  -6    9.42    0.46
   4   9   6    9.40    0.29
  -4   9  -6    9.92    0.37
   4   9   6    8.86    0.32
  -5   9   6    0.46    0.09
  -5   9  -6    0.71    0.19
  -5  -9   6    0.46    0.08
  -5   9  -6    0.49    0.10
   5   9   6    0.49    0.10
   5   9   6    0.45    0.07
  -6   9   6    0.18    0.08
   6   9   6    0.17    0.06
  -6  -9   6    0.17    0.06
  -6   9  -6    0.03    0.11
  -6   9  -6    0.05    0.07
  -7   9   6    0.80    0.11
  -7  -9   6    0.68    0.10
   7   9   6    0.81    0.10
  -7   9  -6    0.71    0.19
  -8   9   6   20.67    0.59
   8   9   6   20.41    0.57
  -8  -9   6   21.26    0.59
  -8   9  -6   21.20    0.77
  -9   9   6    0.94    0.12
  -9  -9   6    0.98    0.13
  -9   9  -6    0.95    0.21
   9   9   6    0.91    0.12
 -10   9   6   -0.05    0.07
 -10   9  -6   -0.04    0.12
 -10  -9   6    0.04    0.06
  10   9   6   -0.02    0.06
  11   9   6    0.22    0.09
 -11   9  -6    0.17    0.16
 -11  -9   6    0.08    0.07
 -12   9  -6   -0.05    0.15
   0  10   6   23.92    0.66
   0  10  -6   23.22    0.70
   0 -10   6   23.94    0.60
  -1  10   6    4.03    0.21
   1 -10   6    3.68    0.16
  -1  10  -6    3.60    0.23
  -1 -10   6    3.71    0.16
   1  10   6    3.60    0.20
  -2  10   6    1.54    0.15
  -2 -10   6    1.61    0.11
   2  10   6    1.32    0.10
   2  10   6    1.50    0.15
  -2  10  -6    1.78    0.25
  -2  10  -6    1.83    0.18
  -3  10   6    0.04    0.06
   3  10   6    0.03    0.06
   3  10   6    0.02    0.04
  -3  10  -6    0.03    0.07
  -3  10  -6   -0.01    0.12
  -3 -10   6    0.00    0.04
  -4  10   6    9.65    0.36
  -4  10  -6   10.18    0.39
   4  10   6    9.47    0.35
  -4 -10   6    9.04    0.30
  -4  10  -6    9.57    0.50
   4  10   6    9.32    0.29
  -5  10   6    4.40    0.23
  -5 -10   6    4.55    0.20
   5  10   6    4.48    0.23
   5  10   6    4.11    0.18
  -5  10  -6    4.16    0.34
  -5  10  -6    4.52    0.25
  -6  10   6    1.99    0.18
  -6  10  -6    1.95    0.19
   6  10   6    1.76    0.13
  -6 -10   6    1.72    0.13
  -6  10  -6    1.96    0.27
  -7  10   6    0.66    0.11
   7  10   6    0.99    0.11
  -7 -10   6    0.74    0.11
  -7  10  -6    0.92    0.21
  -8  10   6   -0.10    0.06
  -8 -10   6   -0.04    0.05
  -8  10  -6   -0.10    0.11
   8  10   6    0.00    0.06
  -9  10   6    2.40    0.20
   9  10   6    1.96    0.17
  -9  10  -6    2.01    0.30
  -9 -10   6    2.15    0.17
 -10  10   6    0.88    0.14
  10  10   6    0.71    0.11
 -10 -10   6    0.80    0.13
 -10  10  -6    0.73    0.20
 -11  10  -6    0.65    0.20
 -11 -10   6    1.14    0.16
   0  11   6   -0.01    0.06
   0 -11   6    0.09    0.05
   0  11  -6    0.01    0.08
   1 -11   6    3.01    0.15
  -1  11   6    3.49    0.22
   1  11  -6    2.97    0.22
  -1 -11   6    3.27    0.16
  -1  11  -6    2.88    0.22
   1  11   6    3.38    0.21
  -2  11   6    2.97    0.20
  -2 -11   6    3.02    0.16
  -2  11  -6    3.55    0.24
   2  11   6    2.81    0.20
  -3  11   6    1.14    0.15
  -3  11  -6    0.90    0.20
   3  11   6    1.13    0.14
  -3  11  -6    0.87    0.15
  -3 -11   6    1.06    0.11
  -4  11   6    0.09    0.07
   4  11   6    0.04    0.07
  -4 -11   6    0.03    0.04
  -4  11  -6    0.00    0.13
  -4  11  -6   -0.04    0.07
  -5  11   6    0.63    0.12
  -5  11  -6    0.90    0.14
  -5  11  -6    1.50    0.26
  -5 -11   6    0.71    0.10
   5  11   6    0.90    0.14
  -6  11   6    2.58    0.19
  -6  11  -6    2.96    0.34
  -6 -11   6    2.41    0.16
   6  11   6    2.83    0.16
  -6  11  -6    2.94    0.22
  -7  11   6    0.95    0.14
   7  11   6    1.01    0.11
  -7 -11   6    0.74    0.11
  -7  11  -6    0.82    0.22
  -8  11   6    7.09    0.32
  -8  11  -6    6.42    0.45
  -8 -11   6    6.51    0.29
   8  11   6    7.17    0.28
  -9  11   6    0.87    0.13
  -9 -11   6    0.95    0.14
  -9  11  -6    0.71    0.22
   9  11   6    0.79    0.12
 -10  11   6    0.15    0.09
 -10  11  -6    0.07    0.16
 -10 -11   6    0.03    0.06
  10  11   6    0.05    0.07
   0  12  -6    0.02    0.08
   0 -12   6    0.04    0.04
   0  12   6    0.18    0.08
  -1  12   6   -0.09    0.06
   1 -12   6    0.08    0.05
  -1 -12   6    0.06    0.05
  -1  12  -6    0.07    0.09
   1  12   6    0.08    0.07
   2 -12   6    0.77    0.09
  -2  12   6    0.97    0.14
   2  12   6    0.78    0.13
  -2 -12   6    0.88    0.10
  -2  12  -6    0.97    0.16
  -3  12   6    0.37    0.10
  -3  12  -6    0.20    0.10
  -3  12  -6    0.23    0.17
   3  12   6    0.51    0.11
  -3 -12   6    0.25    0.06
  -4  12   6    0.99    0.15
  -4 -12   6    1.20    0.12
   4  12   6    1.12    0.15
  -4  12  -6    1.13    0.17
  -4  12  -6    1.00    0.23
  -5  12   6    0.36    0.10
   5  12   6    0.49    0.11
  -5  12  -6    0.72    0.21
  -5  12  -6    0.52    0.13
  -5 -12   6    0.48    0.09
  -6  12   6    1.81    0.19
  -6  12  -6    2.33    0.32
  -6 -12   6    2.39    0.17
  -6  12  -6    2.16    0.22
  -7  12   6    0.28    0.11
  -7  12  -6    0.47    0.19
  -7 -12   6    0.35    0.09
  -8  12   6    0.10    0.10
  -8 -12   6    0.00    0.06
  -8  12  -6   -0.03    0.16
  -9  12   6    0.19    0.10
  -9  12  -6    0.16    0.17
  -9 -12   6    0.04    0.07
 -10  12   6    0.61    0.14
   0  13  -6    0.03    0.09
   0  13   6    0.09    0.08
   0 -13   6    0.04    0.05
   1 -13   6    0.89    0.11
  -1  13   6    0.82    0.14
  -1 -13   6    0.91    0.10
  -1  13  -6    0.98    0.18
   1  13   6    0.91    0.15
   2 -13   6    2.65    0.16
  -2  13   6    3.51    0.25
   2  13   6    2.94    0.22
  -2  13  -6    3.17    0.28
  -2 -13   6    2.72    0.16
  -3  13   6   -0.06    0.07
  -3 -13   6    0.00    0.05
  -3  13  -6   -0.06    0.08
   3  13   6   -0.04    0.08
  -4  13   6    0.15    0.10
  -4 -13   6    0.10    0.06
  -4  13  -6    0.14    0.10
   4  13   6    0.16    0.11
  -4  13  -6    0.09    0.17
  -5  13   6    8.43    0.38
   5  13   6    7.39    0.36
  -5  13  -6    7.47    0.38
  -5  13  -6    8.25    0.53
  -5 -13   6    7.68    0.30
  -6  13   6    0.92    0.16
  -6 -13   6    0.93    0.12
  -6  13  -6    0.46    0.20
  -6  13  -6    0.85    0.16
  -7  13   6    0.39    0.12
  -7  13  -6    0.34    0.20
  -7 -13   6    0.41    0.10
  -8  13   6    0.09    0.11
  -8 -13   6    0.18    0.07
  -8  13  -6    0.09    0.17
   0 -14   6    2.41    0.16
   0  14   6    2.74    0.26
   0  14  -6    2.87    0.29
   1 -14   6    1.64    0.15
  -1  14   6    1.39    0.19
  -1  14  -6    1.93    0.23
   1  14   6    1.35    0.18
  -1 -14   6    1.46    0.14
   2 -14   6    2.31    0.16
  -2  14   6    2.33    0.24
   2  14   6    2.74    0.26
  -2 -14   6    2.26    0.16
  -2  14  -6    2.33    0.26
  -3  14   6   14.00    0.54
   3 -14   6   14.37    0.44
   3  14   6   15.53    0.57
  -3 -14   6   14.16    0.45
  -3  14  -6   15.21    0.59
  -4  14   6    0.79    0.16
   4  14   6    0.96    0.18
  -4  14  -6    0.97    0.18
  -4 -14   6    0.87    0.12
  -5  14   6    0.62    0.17
  -5  14  -6    0.76    0.23
  -5  14  -6    0.45    0.15
  -5 -14   6    0.60    0.11
  -6  14  -6    4.03    0.43
  -6  14  -6    4.55    0.32
  -6 -14   6    4.58    0.24
  -7  14  -6    1.36    0.34
   1  15   6    0.50    0.16
  -1 -15   6    0.67    0.12
  -2 -15   6    0.19    0.08
   2  15   6    0.29    0.13
  -3 -15   6    0.14    0.07
   3  15   6    0.17    0.11
   4  15   6    1.57    0.22
  -4 -15   6    1.36    0.15
   0   0  -7   -0.02    0.04
  -1   0  -7   -0.08    0.04
  -2   0  -7    0.04    0.04
  -2   0   7    0.01    0.01
  -3   0  -7    0.03    0.04
   3   0   7    0.01    0.02
   3   0   7   -0.03    0.02
  -3   0   7   -0.01    0.02
  -4   0   7   -0.03    0.03
   4   0   7   -0.01    0.01
  -4   0  -7   -0.02    0.03
   4   0   7   -0.03    0.02
  -4   0   7   -0.03    0.02
   5   0   7   -0.01    0.02
  -5   0   7   -0.03    0.03
   5   0   7    0.00    0.01
  -5   0  -7   -0.04    0.03
  -5   0   7   -0.01    0.02
  -6   0   7   -0.02    0.02
  -6   0   7   -0.03    0.03
  -6   0  -7    0.05    0.05
   6   0   7    0.03    0.03
  -7   0  -7    0.02    0.05
   7   0   7    0.03    0.03
  -7   0   7   -0.01    0.04
  -7   0   7    0.03    0.03
  -8   0   7    0.02    0.03
  -8   0   7   -0.02    0.03
  -8   0  -7   -0.02    0.05
   8   0   7   -0.01    0.03
  -9   0   7   -0.02    0.03
  -9   0  -7    0.02    0.07
   9   0   7   -0.01    0.04
  -9   0   7   -0.06    0.04
 -10   0   7    0.06    0.06
 -10   0  -7    0.01    0.07
 -10   0   7   -0.02    0.04
  10   0   7    0.05    0.05
 -11   0  -7    0.11    0.08
 -11   0   7    0.03    0.06
 -12   0   7   -0.07    0.05
 -12   0  -7   -0.03    0.07
 -13   0   7    0.05    0.07
 -13   0  -7   -0.06    0.08
 -14   0  -7    0.09    0.10
 -14   0   7   -0.06    0.06
   0   1  -7    0.01    0.05
   0   1   7   -0.03    0.02
   0  -1  -7   -0.01    0.03
  -1   1   7   -0.01    0.01
  -1   1   7    0.03    0.02
  -1  -1  -7    0.00    0.03
  -1  -1   7    0.02    0.02
  -1   1  -7   -0.02    0.04
   1   1   7   -0.01    0.02
  -2  -1  -7    0.34    0.05
  -2   1   7    0.29    0.04
   2   1   7    0.30    0.03
  -2   1  -7    0.27    0.06
  -2  -1   7    0.30    0.03
   3  -1   7    2.75    0.10
  -3   1   7    2.89    0.10
  -3   1   7    2.76    0.12
  -3  -1  -7    2.77    0.12
   3   1   7    2.79    0.10
   3   1   7    2.82    0.09
  -3   1  -7    2.88    0.15
  -3  -1   7    2.66    0.10
   4  -1   7    9.59    0.25
  -4   1   7    9.55    0.27
  -4   1   7    9.91    0.25
  -4  -1  -7    9.68    0.29
  -4   1  -7   10.00    0.32
   4   1   7    9.80    0.26
  -4  -1   7    9.70    0.26
   4   1   7    9.92    0.22
  -5   1   7    1.21    0.07
   5  -1   7    1.18    0.07
  -5   1   7    1.16    0.08
  -5  -1  -7    1.18    0.09
   5   1   7    1.09    0.07
  -5   1  -7    1.24    0.13
  -5  -1   7    1.28    0.08
   5   1   7    1.10    0.04
  -6   1   7    8.24    0.25
   6  -1   7    8.15    0.24
  -6   1   7    8.32    0.25
  -6  -1  -7    8.72    0.28
   6   1   7    8.14    0.24
  -6  -1   7    8.08    0.25
  -6   1  -7    8.11    0.30
  -7   1   7    2.97    0.14
  -7   1   7    3.20    0.14
   7  -1   7    3.19    0.13
  -7  -1  -7    3.03    0.16
   7   1   7    3.03    0.13
  -7  -1   7    3.02    0.14
  -7   1  -7    3.07    0.18
  -8   1   7    0.56    0.08
  -8  -1  -7    0.87    0.11
  -8   1   7    0.67    0.08
   8  -1   7    0.74    0.08
  -8  -1   7    0.77    0.09
   8   1   7    0.61    0.08
  -8  -1   7    0.76    0.09
  -8   1  -7    0.63    0.11
  -9   1   7    4.05    0.17
   9  -1   7    3.85    0.17
  -9  -1  -7    4.47    0.22
  -9   1   7    4.16    0.19
  -9  -1   7    4.02    0.19
  -9   1  -7    3.97    0.23
  -9  -1   7    4.19    0.18
   9   1   7    4.04    0.18
 -10   1   7    2.03    0.14
 -10   1   7    1.91    0.12
  10  -1   7    2.14    0.13
 -10  -1  -7    2.22    0.17
 -10  -1   7    1.76    0.13
  10   1   7    1.95    0.13
 -10   1  -7    1.85    0.19
 -10  -1   7    2.12    0.13
 -11  -1  -7   21.52    0.64
 -11   1   7   21.47    0.60
  11   1   7   20.03    0.57
 -11  -1   7   20.82    0.59
 -11   1  -7   20.13    0.65
 -12   1   7    0.11    0.07
 -12  -1  -7    0.06    0.08
 -12   1  -7    0.14    0.10
 -12  -1   7    0.11    0.07
 -13  -1  -7    0.05    0.09
 -13   1   7   -0.03    0.07
 -13  -1   7   -0.03    0.06
 -13   1  -7   -0.06    0.09
 -14  -1  -7    5.07    0.31
 -14   1   7    4.78    0.27
 -14  -1   7    4.91    0.27
 -14   1  -7    4.50    0.32
 -15   1   7    0.62    0.20
   0   2  -7   10.68    0.37
   0   2   7   11.46    0.29
   0   2   7   11.44    0.24
  -1   2   7    5.32    0.12
  -1  -2  -7    5.22    0.16
  -1   2   7    5.24    0.16
  -1  -2   7    5.37    0.15
   1   2   7    5.24    0.15
  -1   2  -7    5.50    0.24
  -2   2   7    5.93    0.15
  -2   2   7    5.94    0.18
  -2  -2  -7    5.99    0.18
   2   2   7    5.87    0.16
  -2   2  -7    6.33    0.25
  -2  -2   7    5.77    0.17
  -3   2   7    3.68    0.11
   3  -2   7    3.72    0.11
  -3   2   7    3.77    0.14
  -3  -2  -7    3.70    0.13
  -3   2  -7    3.59    0.19
   3   2   7    3.76    0.11
  -3  -2   7    3.76    0.13
   3   2   7    3.78    0.13
  -4   2   7    0.10    0.04
  -4  -2  -7    0.07    0.04
   4  -2   7    0.09    0.02
  -4   2   7    0.06    0.02
   4   2   7    0.09    0.02
  -4   2  -7    0.12    0.07
  -4  -2   7    0.02    0.02
   4   2   7    0.07    0.03
   5  -2   7    0.82    0.06
  -5  -2  -7    0.74    0.08
  -5   2   7    0.84    0.08
  -5   2   7    0.72    0.06
  -5   2  -7    0.85    0.12
  -5  -2   7    0.86    0.08
   5   2   7    0.77    0.04
   5   2   7    0.91    0.08
  -6   2   7    5.97    0.20
   6  -2   7    6.15    0.19
  -6  -2  -7    6.37    0.22
  -6   2   7    6.27    0.21
  -6  -2   7    6.28    0.21
   6   2   7    5.97    0.20
  -6   2  -7    5.85    0.26
  -7   2   7    1.50    0.10
  -7  -2  -7    1.79    0.12
  -7   2   7    1.70    0.10
   7  -2   7    1.62    0.09
  -7  -2   7    1.58    0.11
  -7   2  -7    1.57    0.16
   7   2   7    1.63    0.10
  -8  -2  -7    4.38    0.20
   8  -2   7    4.08    0.16
  -8   2   7    3.96    0.18
  -8   2   7    4.17    0.17
   8   2   7    4.23    0.18
  -8  -2   7    3.98    0.18
  -8   2  -7    4.09    0.23
  -9   2   7   19.85    0.54
   9  -2   7   20.35    0.52
  -9  -2  -7   20.53    0.57
  -9   2   7   19.96    0.52
  -9   2  -7   19.59    0.61
   9   2   7   19.99    0.53
  -9  -2   7   20.43    0.55
 -10  -2  -7   14.89    0.47
 -10   2   7   15.18    0.41
 -10   2   7   14.94    0.45
 -10   2  -7   13.45    0.50
 -10  -2   7   14.59    0.42
 -10  -2   7   14.65    0.45
  10   2   7   14.78    0.43
 -11   2   7    0.07    0.06
 -11  -2  -7    0.12    0.08
 -11  -2   7    0.15    0.07
 -11   2  -7    0.17    0.09
  11   2   7    0.26    0.07
 -12  -2  -7    0.62    0.12
 -12   2   7    0.76    0.12
 -12   2  -7    0.66    0.14
 -12  -2   7    0.85    0.12
 -13  -2  -7    0.28    0.10
 -13   2   7    0.13    0.08
 -13   2  -7    0.35    0.14
 -13  -2   7    0.16    0.09
 -14   2   7   -0.10    0.07
 -14  -2  -7    0.04    0.09
 -14  -2   7    0.05    0.08
 -14   2  -7   -0.08    0.10
 -15   2   7   -0.06    0.08
   0   3   7   -0.27    0.02
   0   3  -7   -0.32    0.07
  -1   3   7    3.67    0.13
  -1  -3  -7    3.85    0.11
  -1  -3   7    3.32    0.12
  -1   3  -7    3.39    0.21
   1   3   7    3.52    0.12
  -2  -3  -7  135.05    2.77
  -2   3   7  132.37    2.80
   2  -3   7  138.01    2.78
  -2   3   7  134.42    2.75
  -2   3  -7  128.99    2.91
   2   3   7  133.07    2.79
  -2  -3   7  131.41    2.81
   2   3   7  133.76    2.78
  -3  -3  -7   12.20    0.30
  -3   3   7   11.99    0.28
   3  -3   7   11.89    0.28
  -3   3   7   11.70    0.32
   3   3   7   12.10    0.31
  -3   3  -7   11.58    0.40
  -3  -3   7   12.00    0.31
   3   3   7   11.75    0.29
   4  -3   7    2.31    0.09
  -4   3   7    2.22    0.09
  -4   3   7    2.24    0.11
  -4  -3  -7    2.32    0.11
   4   3   7    2.21    0.08
   4   3   7    2.17    0.10
  -4   3  -7    2.39    0.17
  -4  -3   7    2.13    0.10
  -5   3   7   15.97    0.41
  -5  -3  -7   15.66    0.40
  -5   3   7   15.47    0.39
   5  -3   7   15.36    0.37
   5   3   7   14.92    0.39
  -5  -3   7   15.48    0.40
  -5   3  -7   15.22    0.48
   5   3   7   15.65    0.36
  -6   3   7    6.83    0.21
   6  -3   7    6.64    0.19
  -6  -3  -7    6.33    0.22
  -6   3   7    6.06    0.21
   6   3   7    6.65    0.21
  -6   3  -7    6.25    0.28
  -6  -3   7    6.05    0.21
   7  -3   7    0.00    0.03
  -7   3   7    0.03    0.04
  -7   3   7   -0.03    0.03
  -7  -3  -7    0.00    0.04
  -7   3  -7   -0.01    0.06
  -7  -3   7   -0.09    0.03
   7   3   7   -0.02    0.03
  -8  -3  -7    3.28    0.17
  -8   3   7    3.43    0.16
   8  -3   7    2.95    0.14
  -8   3   7    3.33    0.15
  -8  -3   7    3.41    0.17
  -8   3  -7    3.27    0.22
   8   3   7    3.43    0.16
  -9   3   7    5.47    0.21
  -9  -3  -7    5.45    0.24
  -9   3   7    5.44    0.23
  -9  -3   7    5.76    0.23
   9   3   7    5.46    0.22
  -9   3  -7    5.26    0.29
 -10   3   7    6.73    0.27
 -10   3   7    6.78    0.24
 -10  -3  -7    6.52    0.28
  10   3   7    6.19    0.25
 -10   3  -7    6.21    0.32
 -10  -3   7    6.30    0.26
 -11  -3  -7    0.00    0.06
 -11   3   7    0.14    0.07
  11   3   7    0.13    0.06
 -11   3  -7    0.14    0.10
 -11  -3   7   -0.02    0.05
 -12   3   7    0.04    0.07
 -12  -3  -7   -0.01    0.07
 -12   3  -7   -0.09    0.07
 -12  -3   7    0.09    0.07
 -13   3   7    0.65    0.12
 -13  -3  -7    0.51    0.12
 -13  -3   7    0.76    0.12
 -13   3  -7    0.71    0.16
 -14  -3  -7    2.85    0.23
 -14   3   7    2.99    0.23
 -14  -3   7    3.22    0.23
 -14   3  -7    2.71    0.29
 -15   3   7    2.73    0.28
   0   4  -7   61.98    1.52
   0   4   7   65.32    1.37
  -1  -4  -7   56.87    1.20
  -1   4   7   58.25    1.25
   1   4   7   57.64    1.24
  -1   4  -7   56.25    1.40
  -1  -4   7   59.65    1.24
   2  -4   7    1.91    0.06
  -2   4   7    1.86    0.09
  -2  -4  -7    1.71    0.07
  -2   4   7    1.83    0.07
  -2   4  -7    1.77    0.18
  -2  -4   7    1.81    0.09
   2   4   7    1.90    0.09
   2   4   7    1.60    0.09
  -3   4   7    0.37    0.04
  -3  -4  -7    0.49    0.05
  -3   4   7    0.35    0.05
   3  -4   7    0.46    0.03
  -3   4  -7    0.36    0.10
  -3  -4   7    0.38    0.05
   3   4   7    0.33    0.05
   3   4   7    0.35    0.05
  -4   4   7    0.02    0.02
   4  -4   7   -0.03    0.01
  -4   4   7    0.02    0.03
  -4  -4  -7   -0.03    0.02
  -4  -4   7   -0.03    0.02
   4   4   7    0.00    0.02
   4   4   7    0.00    0.03
  -4   4  -7   -0.06    0.07
  -5   4   7    0.96    0.09
   5  -4   7    0.83    0.05
  -5   4   7    0.87    0.07
  -5  -4  -7    0.78    0.07
   5   4   7    0.93    0.06
  -5   4  -7    0.85    0.14
   5   4   7    0.86    0.08
  -5  -4   7    0.91    0.09
  -6   4   7    8.82    0.27
  -6  -4  -7    8.52    0.27
  -6   4   7    8.32    0.26
   6  -4   7    8.98    0.24
   6   4   7    8.55    0.26
  -6   4  -7    8.94    0.36
  -6  -4   7    8.89    0.27
  -7  -4  -7    3.81    0.18
   7  -4   7    4.13    0.15
  -7   4   7    3.89    0.17
  -7   4   7    4.45    0.17
  -7  -4   7    4.16    0.18
  -7   4  -7    4.28    0.25
   7   4   7    4.22    0.17
  -8  -4  -7    1.32    0.12
  -8   4   7    1.46    0.12
  -8   4   7    1.24    0.10
  -8  -4   7    1.17    0.11
   8   4   7    1.03    0.10
  -8   4  -7    1.04    0.16
  -9   4   7    1.27    0.13
  -9   4   7    1.00    0.10
  -9  -4  -7    1.10    0.12
   9   4   7    1.12    0.11
  -9  -4   7    1.60    0.14
  -9   4  -7    1.17    0.17
 -10  -4  -7    9.40    0.34
 -10   4   7    9.63    0.34
 -10   4   7    9.43    0.30
 -10  -4   7    9.25    0.33
 -10   4  -7    9.62    0.43
  10   4   7    9.46    0.33
 -11  -4  -7    0.10    0.07
 -11   4   7   -0.07    0.06
  11   4   7    0.07    0.06
 -11  -4   7    0.02    0.06
 -11   4  -7    0.01    0.10
 -12  -4  -7    2.02    0.19
 -12   4   7    1.73    0.18
 -12  -4   7    1.63    0.16
  12   4   7    1.66    0.16
 -12   4  -7    1.79    0.23
 -13   4   7    0.12    0.09
 -13  -4  -7    0.12    0.08
 -13  -4   7    0.08    0.07
 -13   4  -7   -0.08    0.11
 -14   4   7    0.40    0.11
 -14  -4  -7    0.25    0.11
 -14   4  -7    0.35    0.17
 -14  -4   7    0.44    0.12
   0   5   7   -0.01    0.03
   0   5  -7   -0.06    0.07
  -1  -5  -7    3.18    0.08
  -1   5   7    2.97    0.13
   1   5   7    3.05    0.13
  -1  -5   7    3.42    0.12
  -1   5  -7    2.90    0.22
  -2  -5  -7    6.83    0.17
  -2   5   7    6.40    0.18
   2  -5   7    6.53    0.15
  -2   5   7    6.33    0.21
   2   5   7    6.70    0.20
  -2  -5   7    6.35    0.20
   2   5   7    6.56    0.20
  -2   5  -7    6.39    0.31
  -3   5   7    0.98    0.09
  -3   5   7    1.13    0.07
   3  -5   7    1.15    0.05
  -3  -5  -7    1.12    0.06
  -3  -5   7    1.12    0.07
   3   5   7    1.15    0.08
  -3   5  -7    0.96    0.15
   3   5   7    1.20    0.08
  -4  -5  -7    1.16    0.07
  -4   5   7    1.23    0.09
  -4   5   7    1.18    0.08
  -4   5  -7    1.20    0.16
   4   5   7    1.22    0.08
   4   5   7    1.09    0.08
  -4  -5   7    1.24    0.08
  -5   5   7   14.14    0.38
  -5  -5  -7   14.54    0.37
  -5   5   7   14.07    0.39
  -5   5  -7   14.51    0.51
  -5  -5   7   14.14    0.39
   5   5   7   14.47    0.38
  -5   5  -7   14.79    0.41
   5   5   7   14.99    0.38
  -6  -5  -7    7.85    0.25
  -6   5   7    7.52    0.25
  -6   5   7    8.55    0.27
  -6   5  -7    7.98    0.27
  -6   5  -7    8.48    0.37
  -6  -5   7    8.38    0.27
   6   5   7    8.23    0.26
  -7   5   7    1.30    0.11
  -7   5   7    1.17    0.11
  -7  -5  -7    1.36    0.10
  -7   5  -7    1.24    0.17
   7   5   7    1.35    0.10
  -7  -5   7    1.27    0.10
  -8  -5  -7    6.59    0.25
  -8   5   7    6.27    0.23
  -8   5   7    6.24    0.25
  -8  -5   7    6.46    0.25
   8   5   7    6.45    0.24
  -8   5  -7    6.64    0.34
  -9   5   7    2.62    0.16
  -9   5   7    2.46    0.14
  -9  -5  -7    2.57    0.16
   9   5   7    2.45    0.15
  -9  -5   7    2.73    0.16
  -9   5  -7    2.61    0.26
 -10   5   7    4.60    0.20
 -10   5   7    4.38    0.23
 -10  -5  -7    4.39    0.22
 -10   5  -7    4.76    0.31
  10   5   7    4.66    0.21
 -10  -5   7    4.36    0.22
 -11  -5  -7    1.94    0.17
 -11   5   7    1.54    0.16
  11   5   7    1.48    0.14
 -11   5  -7    1.50    0.21
 -11  -5   7    1.36    0.14
 -12   5   7    0.07    0.13
 -12  -5  -7    0.09    0.08
  12   5   7    0.13    0.07
 -12   5  -7    0.25    0.13
 -12  -5   7    0.15    0.08
 -13  -5  -7    0.64    0.12
 -13  -5   7    0.44    0.12
 -13   5  -7    0.51    0.17
 -14  -5  -7    1.42    0.19
   0   6   7    0.02    0.03
  -1   6   7    6.35    0.22
  -1  -6   7    6.27    0.20
  -1   6  -7    7.03    0.34
   1   6   7    6.48    0.20
   1   6   7    6.58    0.22
  -2   6   7    2.26    0.12
   2   6   7    2.40    0.12
  -2  -6   7    2.08    0.11
  -2   6  -7    2.71    0.25
   2   6   7    2.29    0.10
  -3  -6  -7    0.16    0.05
  -3   6   7    0.26    0.06
  -3   6  -7    0.26    0.10
  -3   6  -7    0.26    0.07
   3   6   7    0.13    0.04
  -3  -6   7    0.09    0.04
   3   6   7    0.20    0.05
  -4   6   7    5.31    0.20
  -4  -6  -7    5.42    0.17
  -4   6  -7    6.07    0.32
   4   6   7    5.33    0.19
  -4  -6   7    5.55    0.19
  -4   6  -7    5.33    0.22
   4   6   7    5.50    0.19
  -5   6   7    5.21    0.20
  -5  -6  -7    5.19    0.18
   5   6   7    5.29    0.19
  -5   6  -7    5.22    0.22
   5   6   7    4.87    0.19
  -5   6  -7    5.22    0.30
  -5  -6   7    5.13    0.19
  -6   6   7    0.61    0.08
  -6  -6  -7    0.51    0.07
  -6   6  -7    0.56    0.09
   6   6   7    0.50    0.07
  -6   6  -7    0.35    0.12
  -6  -6   7    0.53    0.08
  -7   6   7    0.11    0.05
  -7  -6  -7    0.15    0.06
  -7  -6   7    0.12    0.05
  -7   6  -7    0.18    0.11
   7   6   7    0.08    0.05
  -8  -6  -7    5.23    0.21
  -8   6   7    4.89    0.20
   8   6   7    4.63    0.21
  -8   6  -7    5.37    0.33
  -8  -6   7    4.59    0.21
  -9   6   7    7.15    0.26
  -9  -6  -7    7.27    0.28
  -9  -6   7    7.11    0.28
  -9   6  -7    7.38    0.39
   9   6   7    7.07    0.27
 -10  -6  -7    0.00    0.05
 -10   6   7    0.01    0.05
 -10   6  -7    0.24    0.13
  10   6   7    0.06    0.06
 -10  -6   7    0.01    0.06
 -11  -6  -7    1.77    0.17
 -11   6  -7    1.30    0.22
  11   6   7    1.40    0.14
 -11  -6   7    1.19    0.14
 -12  -6  -7    1.22    0.16
  12   6   7    0.91    0.13
 -12   6  -7    0.70    0.18
 -12  -6   7    0.97    0.14
 -13  -6  -7    0.00    0.08
 -13  -6   7    0.21    0.08
 -13   6  -7    0.15    0.15
 -14  -6  -7    2.07    0.22
   0  -7   7    0.08    0.04
   0   7   7    0.17    0.05
  -1   7   7    4.75    0.19
   1   7   7    4.58    0.16
   1   7   7    4.53    0.19
  -1   7  -7    4.74    0.30
  -1  -7   7    4.66    0.17
  -2   7   7    0.04    0.04
  -2  -7   7    0.02    0.03
   2   7   7   -0.03    0.03
  -2   7  -7    0.08    0.10
  -2   7  -7    0.06    0.06
   2   7   7   -0.02    0.04
  -3   7   7    0.18    0.05
  -3   7  -7    0.17    0.10
   3   7   7    0.12    0.05
  -3   7  -7    0.16    0.07
  -3  -7   7    0.27    0.05
   3   7   7    0.12    0.04
  -4   7   7    0.07    0.05
   4   7   7    0.00    0.04
  -4  -7   7    0.11    0.04
  -4   7  -7    0.02    0.05
  -4   7  -7    0.30    0.13
   4   7   7    0.13    0.05
  -5   7   7    0.71    0.09
  -5   7  -7    0.43    0.13
   5   7   7    0.55    0.08
  -5   7  -7    0.61    0.10
   5   7   7    0.43    0.06
  -5  -7   7    0.62    0.08
  -6   7   7    0.70    0.09
   6   7   7    0.67    0.08
  -6   7  -7    0.63    0.10
  -6  -7   7    0.59    0.08
  -6   7  -7    0.80    0.17
  -7   7   7    1.62    0.14
  -7  -7   7    1.50    0.12
   7   7   7    1.51    0.11
  -7   7  -7    1.36    0.20
  -8   7   7    1.08    0.11
   8   7   7    1.43    0.13
  -8  -7   7    1.28    0.13
  -8   7  -7    1.44    0.21
  -9   7   7    1.84    0.14
   9   7   7    1.79    0.14
  -9   7  -7    2.26    0.27
  -9  -7   7    1.98    0.15
 -10   7   7    0.11    0.06
 -10   7  -7    0.28    0.14
  10   7   7    0.10    0.07
 -10  -7   7    0.23    0.08
 -11  -7   7    3.67    0.22
  11   7   7    4.02    0.22
 -11   7  -7    3.71    0.35
 -12   7  -7    1.36    0.23
  12   7   7    0.99    0.13
 -12  -7   7    1.83    0.19
   0   8   7   13.75    0.36
   0   8   7   14.07    0.41
   0  -8   7   14.29    0.38
  -1   8   7    0.03    0.05
   1   8   7    0.05    0.04
   1   8   7    0.02    0.05
  -1   8  -7   -0.03    0.09
  -1  -8   7    0.11    0.04
  -2   8   7    0.28    0.07
   2   8   7    0.25    0.05
   2   8   7    0.25    0.06
  -2   8  -7    0.30    0.09
  -2  -8   7    0.25    0.05
  -2   8  -7    0.26    0.12
  -3   8   7    1.38    0.12
  -3  -8   7    1.29    0.09
  -3   8  -7    1.35    0.14
   3   8   7    1.22    0.09
   3   8   7    0.96    0.11
  -3   8  -7    1.31    0.21
  -4   8   7    0.05    0.05
  -4   8  -7   -0.08    0.04
   4   8   7    0.00    0.04
   4   8   7   -0.01    0.05
  -4   8  -7    0.07    0.10
  -4  -8   7   -0.03    0.04
  -5   8   7    9.48    0.32
   5   8   7    9.14    0.31
   5   8   7    9.36    0.29
  -5   8  -7    9.17    0.45
  -5   8  -7    9.53    0.35
  -5  -8   7    9.43    0.30
  -6   8   7    0.15    0.06
  -6  -8   7    0.02    0.04
   6   8   7    0.12    0.05
  -6   8  -7    0.21    0.13
  -6   8  -7    0.18    0.08
  -7   8   7    1.77    0.14
  -7  -8   7    1.77    0.13
   7   8   7    1.88    0.13
  -7   8  -7    2.20    0.25
  -8   8   7    5.65    0.24
   8   8   7    5.38    0.23
  -8   8  -7    4.98    0.36
  -8  -8   7    5.23    0.23
  -9   8   7    0.58    0.10
   9   8   7    0.49    0.10
  -9   8  -7    0.75    0.19
  -9  -8   7    0.51    0.10
 -10   8   7   11.41    0.39
 -10   8  -7   11.76    0.56
 -10  -8   7   12.34    0.42
  10   8   7   11.58    0.40
 -11   8  -7    8.65    0.51
  11   8   7    8.52    0.34
 -11  -8   7    8.56    0.35
 -12  -8   7    0.45    0.11
 -12   8  -7    0.75    0.20
  12   8   7    0.46    0.12
   0   9   7   -0.02    0.03
   0   9   7   -0.03    0.05
   0  -9   7   -0.02    0.03
  -1   9   7    4.67    0.21
   1   9   7    4.40    0.17
  -1   9  -7    4.88    0.25
  -1  -9   7    4.77    0.19
   1   9   7    4.79    0.22
  -2   9   7   13.14    0.41
   2   9   7   13.22    0.41
   2   9   7   13.16    0.36
  -2   9  -7   12.94    0.57
  -2  -9   7   13.12    0.38
  -2   9  -7   14.03    0.46
  -3   9   7    0.10    0.06
   3   9   7    0.21    0.07
  -3  -9   7    0.08    0.05
  -3   9  -7   -0.10    0.09
  -3   9  -7    0.17    0.08
   3   9   7    0.06    0.04
  -4   9   7    6.27    0.26
   4   9   7    6.75    0.27
  -4   9  -7    5.84    0.38
  -4   9  -7    5.92    0.28
  -4  -9   7    6.08    0.23
   4   9   7    6.46    0.22
  -5   9   7    7.49    0.29
  -5   9  -7    7.30    0.43
  -5   9  -7    7.85    0.32
   5   9   7    7.59    0.29
  -5  -9   7    7.59    0.27
   5   9   7    7.15    0.25
  -6   9   7    0.61    0.10
  -6   9  -7    0.70    0.12
   6   9   7    0.66    0.09
  -6  -9   7    0.43    0.08
  -6   9  -7    0.50    0.16
  -7   9   7    0.01    0.06
  -7   9  -7   -0.04    0.10
  -7  -9   7    0.02    0.05
   7   9   7   -0.04    0.05
  -8   9   7    0.12    0.07
   8   9   7   -0.05    0.05
  -8  -9   7   -0.03    0.06
  -8   9  -7   -0.16    0.11
  -9   9   7    0.07    0.07
   9   9   7    0.08    0.07
  -9   9  -7   -0.01    0.12
  -9  -9   7    0.16    0.08
 -10   9   7    0.35    0.09
 -10   9  -7    0.22    0.17
 -10  -9   7    0.34    0.09
  10   9   7    0.30    0.09
 -11   9  -7    0.50    0.19
 -11  -9   7    0.33    0.09
  11   9   7    0.30    0.10
   0  10   7   14.47    0.45
   0 -10   7   14.01    0.40
   1 -10   7    0.98    0.10
  -1  10   7    0.74    0.11
  -1  10  -7    0.74    0.13
  -1 -10   7    0.96    0.10
   1  10   7    0.92    0.10
   1  10   7    0.95    0.13
  -2  10   7    6.56    0.28
  -2  10  -7    5.98    0.40
  -2 -10   7    6.63    0.24
   2  10   7    6.50    0.28
   2  10   7    6.40    0.22
  -2  10  -7    6.91    0.32
  -3  10   7    1.96    0.16
   3  10   7    2.06    0.12
  -3 -10   7    2.12    0.13
  -3  10  -7    2.68    0.20
  -3  10  -7    1.95    0.28
   3  10   7    2.71    0.18
  -4  10   7    0.15    0.07
  -4 -10   7    0.26    0.06
  -4  10  -7    0.20    0.10
   4  10   7    0.22    0.06
  -4  10  -7    0.24    0.16
   4  10   7    0.36    0.09
  -5  10   7    0.33    0.10
  -5 -10   7    0.30    0.07
  -5  10  -7    0.45    0.17
  -5  10  -7    0.43    0.11
   5  10   7    0.28    0.06
   5  10   7    0.32    0.09
  -6  10   7    4.13    0.23
  -6  10  -7    3.47    0.37
  -6 -10   7    3.49    0.18
  -6  10  -7    3.71    0.23
   6  10   7    3.66    0.18
  -7  10   7    0.72    0.12
  -7 -10   7    0.75    0.11
   7  10   7    0.81    0.10
  -7  10  -7    0.98    0.23
  -8  10   7    0.42    0.10
  -8 -10   7    0.38    0.09
   8  10   7    0.40    0.09
  -8  10  -7    0.53    0.18
  -9  10   7   -0.01    0.08
  -9 -10   7   -0.05    0.06
   9  10   7    0.00    0.06
  -9  10  -7   -0.02    0.15
 -10  10   7    1.09    0.15
  10  10   7    0.91    0.13
 -10 -10   7    1.16    0.15
 -10  10  -7    0.82    0.21
 -11  10  -7    0.32    0.19
  11  10   7    0.23    0.09
   0 -11   7    0.02    0.05
   0  11   7    0.01    0.07
   1 -11   7    1.73    0.12
  -1  11   7    1.87    0.17
  -1  11  -7    1.57    0.19
   1  11   7    1.70    0.17
  -1 -11   7    1.89    0.13
  -2  11   7   -0.06    0.06
   2  11   7   -0.03    0.06
  -2 -11   7    0.00    0.04
  -2  11  -7    0.10    0.09
  -3  11   7    0.46    0.11
  -3  11  -7    0.31    0.11
  -3 -11   7    0.43    0.08
   3  11   7    0.45    0.11
  -3  11  -7    0.30    0.17
  -4  11   7    0.89    0.13
   4  11   7    0.73    0.12
  -4  11  -7    0.72    0.13
  -4  11  -7    0.81    0.21
  -4 -11   7    0.82    0.11
  -5  11   7    4.35    0.24
  -5  11  -7    3.98    0.40
   5  11   7    4.11    0.24
  -5  11  -7    4.50    0.27
  -5 -11   7    4.23    0.21
   5  11   7    4.06    0.21
  -6  11   7    2.15    0.19
   6  11   7    2.25    0.14
  -6 -11   7    2.09    0.15
  -6  11  -7    2.20    0.22
  -6  11  -7    2.24    0.30
  -7  11   7    0.23    0.10
  -7  11  -7    0.19    0.16
   7  11   7    0.25    0.08
  -7 -11   7    0.00    0.06
  -8  11   7    6.18    0.30
   8  11   7    6.12    0.26
  -8  11  -7    6.17    0.46
  -8 -11   7    5.30    0.26
  -9  11   7    0.02    0.08
  -9  11  -7   -0.01    0.16
  -9 -11   7    0.11    0.08
   9  11   7    0.04    0.07
 -10  11   7    1.56    0.18
  10  11   7    1.46    0.15
 -10  11  -7    2.10    0.33
   0 -12   7    0.12    0.06
   0  12   7    0.02    0.08
  -1  12   7    0.24    0.09
   1 -12   7    0.13    0.06
  -1  12  -7   -0.02    0.08
   1  12   7    0.12    0.08
  -1 -12   7    0.24    0.07
   2 -12   7    0.54    0.08
  -2  12   7    0.36    0.10
  -2 -12   7    0.60    0.09
  -2  12  -7    0.32    0.12
   2  12   7    0.65    0.13
  -3  12   7    0.06    0.09
  -3  12  -7    0.25    0.17
  -3 -12   7    0.27    0.07
  -3  12  -7    0.29    0.12
   3  12   7    0.31    0.10
  -4  12   7    0.45    0.11
  -4 -12   7    0.54    0.09
   4  12   7    0.28    0.10
  -4  12  -7    0.59    0.20
  -4  12  -7    0.57    0.14
  -5  12   7    0.06    0.09
  -5  12  -7   -0.21    0.13
  -5  12  -7    0.06    0.08
   5  12   7    0.04    0.10
  -5 -12   7    0.01    0.05
  -6  12   7    0.21    0.10
  -6  12  -7    0.33    0.17
  -6 -12   7    0.18    0.07
  -6  12  -7   -0.08    0.07
  -7  12   7    1.55    0.18
  -7  12  -7    1.15    0.26
  -7 -12   7    1.35    0.15
  -8  12   7    2.29    0.23
  -8  12  -7    2.23    0.32
  -9  12   7   -0.03    0.08
  -9  12  -7    0.30    0.21
   0 -13   7   -0.03    0.04
   0  13   7   -0.01    0.08
   1 -13   7    1.69    0.14
  -1  13   7    1.88    0.20
   1  13   7    1.84    0.20
  -1 -13   7    1.37    0.13
  -1  13  -7    1.47    0.20
  -2  13   7    0.57    0.13
   2 -13   7    0.54    0.09
   2  13   7    0.42    0.12
  -2 -13   7    0.43    0.08
  -2  13  -7    0.50    0.13
  -3  13   7    0.19    0.10
   3  13   7    0.22    0.10
  -3  13  -7    0.02    0.10
  -3 -13   7    0.16    0.07
  -4  13   7   -0.02    0.08
  -4  13  -7    0.09    0.10
  -4  13  -7    0.23    0.18
  -4 -13   7   -0.07    0.05
   4  13   7    0.12    0.10
  -5  13   7    0.16    0.10
  -5 -13   7    0.19    0.08
  -5  13  -7    0.45    0.14
  -5  13  -7   -0.15    0.15
  -6  13   7    0.32    0.11
  -6 -13   7    0.34    0.09
  -6  13  -7    0.76    0.23
  -6  13  -7    0.56    0.13
  -7  13   7    3.79    0.27
  -7 -13   7    3.46    0.21
  -7  13  -7    4.34    0.45
   0  14   7    1.06    0.16
   0 -14   7    1.28    0.13
  -1  14   7    0.22    0.11
   1 -14   7    0.22    0.07
  -1 -14   7    0.06    0.06
   1  14   7   -0.08    0.10
  -2  14   7    0.18    0.10
   2 -14   7    0.02    0.06
  -2 -14   7    0.15    0.07
  -2  14  -7    0.00    0.11
   2  14   7    0.22    0.11
  -3  14   7    2.12    0.23
   3 -14   7    2.00    0.15
  -3 -14   7    2.23    0.16
   3  14   7    1.81    0.21
  -3  14  -7    2.19    0.26
  -4  14   7    1.35    0.19
   4  14   7    2.05    0.22
  -4 -14   7    1.69    0.16
  -4  14  -7    1.99    0.24
  -5 -14   7    3.26    0.20
  -5  14  -7    2.81    0.37
  -5  14  -7    3.73    0.32
  -6  14  -7    0.17    0.12
  -6 -14   7    0.03    0.07
  -6  14  -7    0.06    0.17
   0 -15   7    0.07    0.06
   1 -15   7    0.38    0.09
  -1 -15   7    0.49    0.10
   2 -15   7    0.11    0.07
  -2 -15   7    0.11    0.07
   3 -15   7    1.10    0.13
  -3 -15   7    1.23    0.15
   4 -15   7    2.37    0.21
   0   0  -8   10.46    0.32
  -1   0   8   42.93    0.92
  -1   0  -8   44.10    1.01
  -2   0  -8    0.49    0.08
  -2   0   8    0.55    0.04
   3   0   8   10.30    0.26
  -3   0   8   10.13    0.26
  -3   0  -8   10.60    0.32
   3   0   8   10.15    0.25
   4   0   8   -0.01    0.02
   4   0   8   -0.01    0.01
  -4   0   8   -0.01    0.03
  -4   0   8    0.05    0.03
  -4   0  -8    0.01    0.05
  -5   0   8    5.90    0.21
   5   0   8    6.18    0.19
  -5   0  -8    5.75    0.24
  -5   0   8    6.19    0.19
   5   0   8    6.20    0.15
   6   0   8   34.51    0.77
  -6   0   8   33.67    0.79
  -6   0  -8   33.05    0.83
  -6   0   8   33.74    0.78
  -7   0   8   17.83    0.48
  -7   0  -8   18.56    0.53
  -7   0   8   18.67    0.47
   7   0   8   17.85    0.46
   8   0   8   -0.02    0.03
  -8   0   8    0.03    0.04
  -8   0  -8    0.02    0.05
  -8   0   8    0.01    0.04
  -9   0   8   21.31    0.57
   9   0   8   21.18    0.55
  -9   0   8   21.59    0.56
  -9   0  -8   21.31    0.63
  10   0   8   12.42    0.37
 -10   0  -8   12.12    0.44
 -10   0   8   12.12    0.39
 -10   0   8   12.18    0.37
  11   0   8    0.54    0.09
 -11   0  -8    0.44    0.11
 -11   0   8    0.61    0.10
 -12   0   8    0.29    0.08
 -12   0  -8    0.22    0.11
 -13   0  -8    0.19    0.11
 -13   0   8    0.48    0.11
 -14   0  -8    0.12    0.11
 -14   0   8    0.09    0.07
   0   1  -8   -0.09    0.05
   0   1   8    0.01    0.02
  -1   1   8    0.45    0.03
  -1   1   8    0.27    0.04
  -1  -1  -8    0.46    0.07
  -1   1  -8    0.44    0.08
   1   1   8    0.30    0.04
  -1  -1   8    0.36    0.04
  -2  -1  -8    0.21    0.05
  -2   1   8    0.27    0.05
  -2   1   8    0.25    0.03
  -2  -1   8    0.18    0.03
  -2   1  -8    0.16    0.07
   2   1   8    0.19    0.03
   3  -1   8    4.78    0.15
  -3   1   8    4.92    0.14
  -3   1   8    4.86    0.17
  -3  -1  -8    5.22    0.19
   3   1   8    4.88    0.15
  -3   1  -8    4.85    0.21
  -3  -1   8    4.79    0.15
   3   1   8    4.89    0.14
  -4   1   8   25.82    0.59
  -4  -1  -8   26.58    0.64
  -4   1   8   25.86    0.62
   4  -1   8   26.60    0.59
   4   1   8   25.77    0.56
  -4   1  -8   26.43    0.68
   4   1   8   25.58    0.60
  -4  -1   8   25.97    0.60
  -5  -1  -8    0.17    0.06
  -5   1   8    0.19    0.04
   5  -1   8    0.21    0.04
  -5   1   8    0.17    0.05
  -5  -1   8    0.25    0.04
   5   1   8    0.23    0.04
  -5   1  -8    0.19    0.06
   5   1   8    0.23    0.02
  -6   1   8   -0.07    0.03
   6  -1   8    0.03    0.03
  -6   1   8   -0.02    0.02
  -6  -1  -8   -0.07    0.04
  -6  -1   8    0.00    0.03
   6   1   8    0.06    0.04
  -6   1  -8    0.00    0.05
  -7   1   8    1.33    0.10
  -7   1   8    1.41    0.10
  -7  -1  -8    1.54    0.14
   7  -1   8    1.51    0.09
  -7   1  -8    1.55    0.15
   7   1   8    1.46    0.10
  -7  -1   8    1.37    0.11
  -7  -1   8    1.62    0.10
   8  -1   8    0.45    0.07
  -8   1   8    0.44    0.07
  -8  -1  -8    0.47    0.09
  -8   1   8    0.58    0.08
  -8   1  -8    0.44    0.10
  -8  -1   8    0.42    0.07
   8   1   8    0.42    0.06
  -8  -1   8    0.53    0.08
  -9   1   8    0.41    0.07
   9  -1   8    0.55    0.08
  -9  -1  -8    0.60    0.10
  -9   1   8    0.58    0.09
  -9  -1   8    0.53    0.08
  -9   1  -8    0.54    0.11
  -9  -1   8    0.45    0.08
   9   1   8    0.55    0.08
 -10   1   8    7.42    0.26
  10  -1   8    6.93    0.26
 -10  -1  -8    7.54    0.32
 -10   1   8    7.08    0.28
 -10   1  -8    7.47    0.33
 -10  -1   8    7.17    0.28
 -10  -1   8    7.17    0.26
  10   1   8    6.98    0.26
 -11   1   8   16.88    0.50
 -11  -1  -8   16.34    0.55
  11   1   8   16.42    0.48
 -11  -1   8   16.10    0.50
 -11   1  -8   16.42    0.57
 -12  -1  -8    1.98    0.21
 -12   1   8    1.67    0.16
 -12  -1   8    1.84    0.18
 -12   1  -8    1.51    0.19
 -13   1   8   -0.07    0.06
 -13  -1  -8   -0.09    0.07
 -13  -1   8    0.01    0.07
 -13   1  -8    0.03    0.10
 -14  -1  -8    0.01    0.09
 -14   1   8   -0.05    0.06
 -14   1  -8    0.12    0.11
 -14  -1   8   -0.04    0.07
   0   2   8  176.60    3.75
   0   2  -8  179.02    3.87
   0   2   8  186.19    3.74
  -1   2   8    8.76    0.25
  -1   2   8    9.06    0.20
  -1  -2  -8    9.15    0.25
  -1  -2   8    9.29    0.23
  -1   2  -8    8.62    0.33
   1   2   8    9.13    0.24
  -2   2   8   16.08    0.40
  -2  -2  -8   15.90    0.39
  -2   2   8   15.89    0.35
   2   2   8   15.91    0.37
  -2   2  -8   15.36    0.48
  -2  -2   8   15.78    0.38
  -3  -2  -8    0.02    0.03
  -3   2   8    0.00    0.03
  -3   2   8    0.03    0.02
   3  -2   8    0.00    0.02
   3   2   8    0.00    0.02
  -3  -2   8   -0.03    0.02
  -3   2  -8   -0.06    0.05
   3   2   8    0.00    0.02
  -4  -2  -8   20.52    0.51
  -4   2   8   20.40    0.51
  -4   2   8   21.16    0.48
   4  -2   8   20.54    0.48
  -4  -2   8   20.60    0.49
   4   2   8   20.61    0.49
  -4   2  -8   20.47    0.59
   4   2   8   21.45    0.46
   5  -2   8    1.36    0.07
  -5   2   8    1.38    0.08
  -5   2   8    1.17    0.09
  -5  -2  -8    1.31    0.10
  -5   2  -8    1.18    0.13
   5   2   8    1.27    0.05
  -5  -2   8    1.40    0.08
   5   2   8    1.28    0.08
  -6   2   8   16.52    0.41
  -6  -2  -8   15.96    0.44
   6  -2   8   16.24    0.40
  -6   2   8   16.19    0.43
  -6  -2   8   15.62    0.42
  -6   2  -8   15.78    0.50
   6   2   8   15.83    0.42
   7  -2   8    0.05    0.03
  -7   2   8    0.06    0.04
  -7  -2  -8    0.00    0.05
  -7   2   8    0.04    0.04
   7   2   8   -0.02    0.03
  -7  -2   8    0.03    0.04
  -7   2  -8    0.08    0.07
  -8  -2  -8    6.11    0.25
  -8   2   8    6.29    0.23
  -8   2   8    6.62    0.23
   8  -2   8    5.99    0.21
  -8  -2   8    6.22    0.23
  -8   2  -8    6.61    0.30
   8   2   8    6.12    0.22
  -9   2   8    3.32    0.16
   9  -2   8    3.03    0.15
  -9  -2  -8    3.46    0.20
  -9   2   8    3.49    0.17
   9   2   8    3.34    0.16
  -9  -2   8    3.23    0.17
  -9   2  -8    2.99    0.21
  -9  -2   8    3.34    0.17
 -10   2   8    7.80    0.29
 -10   2   8    7.39    0.27
 -10  -2  -8    7.78    0.32
 -10   2  -8    7.51    0.36
 -10  -2   8    7.52    0.27
  10   2   8    7.89    0.28
 -10  -2   8    7.92    0.29
 -11   2   8    0.18    0.07
 -11  -2  -8    0.10    0.08
  11   2   8    0.02    0.05
 -11   2  -8    0.19    0.11
 -11  -2   8    0.06    0.06
 -12  -2  -8    0.35    0.10
 -12   2   8    0.29    0.08
 -12  -2   8    0.31    0.08
 -12   2  -8    0.29    0.12
  12   2   8    0.29    0.09
 -13  -2  -8    3.10    0.23
 -13   2   8    3.08    0.21
 -13   2  -8    3.08    0.30
 -13  -2   8    3.05    0.21
 -14  -2  -8    0.17    0.10
 -14   2   8    0.30    0.11
 -14   2  -8    0.08    0.13
 -14  -2   8    0.18    0.09
   0   3  -8    0.08    0.07
   0   3   8    0.00    0.03
  -1   3   8   34.37    0.77
  -1  -3  -8   34.42    0.73
  -1  -3   8   33.25    0.75
  -1   3  -8   33.60    0.89
   1   3   8   33.53    0.75
  -2  -3  -8   19.94    0.46
  -2   3   8   20.52    0.43
  -2   3   8   19.95    0.49
  -2  -3   8   20.10    0.47
  -2   3  -8   19.81    0.60
   2   3   8   19.80    0.46
   2   3   8   19.75    0.47
  -3  -3  -8    8.00    0.23
   3  -3   8    8.00    0.20
  -3   3   8    8.10    0.20
  -3   3   8    7.88    0.24
  -3   3  -8    7.65    0.32
  -3  -3   8    8.21    0.23
   3   3   8    8.09    0.23
   3   3   8    7.94    0.21
   4  -3   8    0.00    0.02
  -4   3   8   -0.02    0.03
  -4  -3  -8    0.01    0.03
  -4   3   8    0.02    0.02
   4   3   8   -0.01    0.03
  -4  -3   8    0.05    0.03
  -4   3  -8    0.01    0.07
   4   3   8    0.01    0.02
  -5   3   8   34.04    0.77
  -5   3   8   33.84    0.80
  -5  -3  -8   33.40    0.79
   5  -3   8   34.34    0.76
   5   3   8   34.84    0.79
   5   3   8   34.32    0.74
  -5  -3   8   33.92    0.79
  -5   3  -8   34.68    0.90
  -6   3   8    6.89    0.22
  -6  -3  -8    6.50    0.23
  -6   3   8    6.82    0.23
   6  -3   8    6.73    0.20
   6   3   8    6.93    0.23
  -6   3  -8    7.61    0.32
  -6  -3   8    6.67    0.23
   7  -3   8   11.44    0.31
  -7   3   8   11.33    0.33
  -7   3   8   11.95    0.34
  -7  -3  -8   11.11    0.35
  -7   3  -8   11.69    0.43
  -7  -3   8   11.41    0.34
   7   3   8   11.27    0.33
  -8   3   8   14.42    0.41
  -8   3   8   14.82    0.41
  -8  -3  -8   14.04    0.43
   8  -3   8   14.32    0.38
   8   3   8   13.54    0.40
  -8   3  -8   13.88    0.50
  -8  -3   8   14.13    0.41
  -9  -3  -8   13.79    0.43
  -9   3   8   14.20    0.41
  -9   3   8   13.74    0.39
   9  -3   8   13.12    0.38
   9   3   8   12.97    0.39
  -9   3  -8   13.54    0.50
  -9  -3   8   13.32    0.41
 -10  -3  -8   13.20    0.43
 -10   3   8   12.87    0.38
 -10   3   8   12.49    0.41
  10   3   8   12.86    0.40
 -10  -3   8   13.25    0.41
 -10   3  -8   12.54    0.50
 -11  -3  -8    2.09    0.20
 -11   3   8    2.42    0.17
 -11  -3   8    2.27    0.16
 -11   3  -8    2.28    0.24
  11   3   8    2.23    0.15
 -12   3   8    1.27    0.15
 -12  -3  -8    1.17    0.16
  12   3   8    0.99    0.13
 -12  -3   8    1.30    0.14
 -12   3  -8    1.44    0.20
 -13  -3  -8    0.42    0.11
 -13   3   8    0.27    0.09
 -13   3  -8    0.45    0.15
 -13  -3   8    0.53    0.11
 -14   3   8    5.43    0.30
 -14  -3  -8    5.73    0.33
 -14  -3   8    5.66    0.30
 -14   3  -8    5.61    0.39
   0   4  -8    7.47    0.34
   0   4   8    8.41    0.24
  -1   4   8    0.39    0.05
  -1   4  -8    0.37    0.11
  -1  -4   8    0.42    0.05
   1   4   8    0.38    0.05
   2  -4   8   16.64    0.37
  -2   4   8   16.26    0.42
  -2   4   8   15.98    0.36
  -2  -4  -8   16.85    0.38
   2   4   8   16.61    0.41
  -2   4  -8   15.71    0.54
  -2  -4   8   16.19    0.41
   2   4   8   17.31    0.40
   3  -4   8    0.56    0.04
  -3   4   8    0.53    0.04
  -3  -4  -8    0.48    0.05
  -3   4   8    0.46    0.06
  -3  -4   8    0.43    0.05
  -3   4  -8    0.47    0.12
   3   4   8    0.49    0.06
   3   4   8    0.46    0.05
  -4   4   8    4.58    0.17
  -4   4   8    4.42    0.14
   4  -4   8    4.54    0.13
  -4  -4  -8    4.63    0.16
   4   4   8    4.56    0.15
  -4   4  -8    4.36    0.25
   4   4   8    4.35    0.16
  -4  -4   8    4.70    0.17
  -5   4   8   12.63    0.36
  -5   4   8   13.47    0.34
  -5  -4  -8   12.85    0.35
   5  -4   8   13.38    0.32
  -5  -4   8   12.93    0.36
   5   4   8   13.24    0.33
  -5   4  -8   13.01    0.47
   5   4   8   13.05    0.35
  -6   4   8    2.55    0.13
  -6  -4  -8    2.62    0.13
  -6   4   8    2.32    0.12
   6  -4   8    2.43    0.10
  -6  -4   8    2.66    0.13
  -6   4  -8    2.46    0.22
   6   4   8    2.30    0.12
  -7   4   8    0.61    0.08
   7  -4   8    0.67    0.06
  -7   4   8    0.56    0.07
  -7  -4  -8    0.69    0.09
   7   4   8    0.60    0.08
  -7   4  -8    0.50    0.12
  -7  -4   8    0.71    0.09
  -8   4   8    5.95    0.22
  -8  -4  -8    5.72    0.23
  -8   4   8    5.74    0.22
  -8   4  -8    5.22    0.30
  -8  -4   8    5.54    0.23
   8   4   8    5.67    0.22
  -9   4   8    0.22    0.07
  -9  -4  -8    0.17    0.06
  -9   4   8    0.29    0.07
  -9   4  -8   -0.06    0.08
   9   4   8    0.10    0.05
  -9  -4   8    0.15    0.06
 -10   4   8    4.17    0.21
 -10  -4  -8    4.20    0.22
 -10   4   8    4.05    0.19
 -10   4  -8    4.24    0.29
 -10  -4   8    4.53    0.22
  10   4   8    4.23    0.20
 -11   4   8    0.09    0.07
 -11  -4  -8    0.11    0.07
  11   4   8    0.11    0.06
 -11  -4   8    0.00    0.06
 -11   4  -8   -0.04    0.10
 -12  -4  -8    3.46    0.23
 -12   4   8    3.86    0.23
  12   4   8    3.29    0.20
 -12  -4   8    3.95    0.22
 -12   4  -8    3.31    0.32
 -13  -4  -8    0.34    0.11
 -13  -4   8    0.69    0.12
 -13   4  -8    0.54    0.16
 -14  -4  -8    0.44    0.13
   0   5   8   -0.02    0.03
   0   5  -8    0.06    0.08
  -1   5   8    9.07    0.26
   1   5   8    8.94    0.26
  -1  -5   8    9.19    0.26
  -1   5  -8    8.76    0.39
  -2   5   8   16.77    0.43
   2  -5   8   16.40    0.36
  -2  -5   8   16.44    0.41
  -2   5  -8   15.69    0.56
   2   5   8   16.60    0.41
   2   5   8   16.51    0.41
  -3   5   8   13.05    0.36
   3  -5   8   12.81    0.31
  -3  -5  -8   13.01    0.32
  -3  -5   8   13.21    0.35
   3   5   8   13.04    0.34
  -3   5  -8   13.32    0.49
   3   5   8   12.86    0.34
  -4  -5  -8    7.20    0.21
  -4   5   8    7.44    0.24
   4   5   8    7.56    0.22
   4   5   8    6.84    0.23
  -4   5  -8    7.90    0.36
  -4  -5   8    7.65    0.23
  -5   5   8    1.76    0.11
  -5  -5  -8    1.62    0.10
   5   5   8    1.63    0.10
   5   5   8    1.70    0.10
  -5  -5   8    1.77    0.10
  -5   5  -8    1.65    0.19
  -6  -5  -8    4.95    0.19
  -6   5   8    4.77    0.19
  -6  -5   8    4.87    0.19
   6   5   8    4.75    0.19
  -6   5  -8    4.87    0.29
  -7  -5  -8    0.24    0.06
  -7   5   8    0.11    0.05
  -7   5  -8    0.20    0.10
  -7  -5   8    0.19    0.06
   7   5   8    0.19    0.05
  -8  -5  -8   14.32    0.42
  -8   5   8   13.87    0.41
  -8  -5   8   14.39    0.43
   8   5   8   14.25    0.41
  -8   5  -8   14.70    0.55
  -9  -5  -8    3.08    0.18
  -9   5   8    3.07    0.16
  -9  -5   8    3.31    0.18
   9   5   8    3.22    0.17
  -9   5  -8    3.36    0.30
 -10   5   8    6.46    0.25
 -10  -5  -8    6.11    0.27
  10   5   8    6.48    0.26
 -10   5  -8    6.73    0.38
 -10  -5   8    6.57    0.27
 -11  -5  -8    5.95    0.28
  11   5   8    5.87    0.26
 -11   5  -8    5.80    0.37
 -11  -5   8    5.72    0.26
 -12  -5  -8    1.64    0.17
  12   5   8    2.09    0.18
 -12   5  -8    1.77    0.25
 -12  -5   8    1.86    0.18
 -13  -5  -8    0.19    0.09
 -13  -5   8    0.19    0.10
 -13   5  -8    0.06    0.12
 -14  -5  -8    0.20    0.10
   0   6   8    0.64    0.07
  -1   6   8    1.12    0.10
  -1  -6   8    0.97    0.07
  -1   6  -8    0.95    0.17
   1   6   8    0.91    0.08
  -2   6   8    2.46    0.12
  -2   6  -8    2.19    0.23
   2   6   8    2.46    0.12
   2   6   8    2.40    0.11
  -2  -6   8    2.23    0.11
  -3   6   8    1.17    0.10
   3   6   8    1.60    0.10
  -3   6  -8    1.46    0.19
   3   6   8    1.39    0.10
  -3  -6   8    1.35    0.09
  -4   6   8    0.65    0.08
   4   6   8    0.61    0.07
  -4   6  -8    0.42    0.13
   4   6   8    0.56    0.07
  -4  -6   8    0.53    0.07
  -5   6   8    7.06    0.25
   5   6   8    7.39    0.24
  -5   6  -8    7.56    0.38
  -5  -6   8    7.19    0.24
   5   6   8    7.27    0.24
  -6   6   8    2.32    0.13
  -6  -6   8    2.51    0.14
   6   6   8    2.34    0.13
  -6   6  -8    2.06    0.23
  -7   6   8    0.25    0.06
   7   6   8    0.18    0.05
  -7  -6   8    0.17    0.06
  -7   6  -8   -0.03    0.10
  -8   6   8    0.51    0.08
  -8  -6  -8    0.55    0.10
   8   6   8    0.57    0.09
  -8  -6   8    0.73    0.10
  -8   6  -8    0.45    0.14
  -9  -6  -8    1.80    0.17
  -9   6   8    1.20    0.12
   9   6   8    1.45    0.13
  -9  -6   8    1.68    0.13
  -9   6  -8    1.53    0.21
 -10   6   8    0.08    0.05
 -10  -6  -8    0.16    0.08
 -10   6  -8    0.40    0.14
  10   6   8    0.19    0.07
 -10  -6   8    0.07    0.06
 -11  -6  -8   -0.04    0.07
  11   6   8    0.08    0.07
 -11   6  -8    0.11    0.12
 -11  -6   8    0.03    0.06
  12   6   8    1.61    0.16
 -12   6  -8    2.14    0.28
 -12  -6   8    2.14    0.20
 -13   6  -8    0.08    0.15
 -13  -6   8    0.06    0.08
   0   7   8   -0.02    0.04
   0  -7   8   -0.03    0.02
  -1   7   8    2.97    0.15
  -1  -7   8    2.73    0.13
  -1   7  -8    3.37    0.26
   1   7   8    2.64    0.14
   1   7   8    2.75    0.12
  -2   7   8    8.78    0.28
   2   7   8    8.63    0.26
   2   7   8    8.55    0.28
  -2  -7   8    8.54    0.27
  -2   7  -8    9.24    0.43
  -3   7   8    0.15    0.05
   3   7   8    0.16    0.05
  -3  -7   8    0.10    0.04
  -3   7  -8    0.08    0.10
   3   7   8    0.15    0.04
  -4   7   8    3.93    0.18
   4   7   8    4.31    0.18
   4   7   8    4.42    0.17
  -4  -7   8    4.34    0.18
  -4   7  -8    4.49    0.30
  -5   7   8   13.14    0.40
   5   7   8   13.75    0.39
   5   7   8   14.19    0.39
  -5  -7   8   13.05    0.39
  -5   7  -8   13.59    0.55
  -5   7  -8   13.76    0.43
  -6   7   8    3.21    0.17
  -6   7  -8    2.78    0.28
  -6  -7   8    3.27    0.16
  -6   7  -8    3.01    0.20
   6   7   8    2.79    0.15
  -7   7   8    5.33    0.23
  -7   7  -8    5.31    0.34
  -7  -7   8    4.99    0.22
   7   7   8    5.31    0.22
  -8   7   8    0.60    0.09
   8   7   8    0.50    0.08
  -8   7  -8    0.73    0.17
  -8  -7   8    0.56    0.10
  -9   7   8   14.55    0.43
  -9  -7   8   13.67    0.44
   9   7   8   13.38    0.42
  -9   7  -8   13.93    0.60
 -10   7   8    6.22    0.26
 -10  -7   8    6.69    0.29
 -10   7  -8    6.96    0.43
  10   7   8    6.60    0.28
 -11  -7   8    2.72    0.20
  11   7   8    2.93    0.19
 -11   7  -8    2.88    0.32
  12   7   8    0.53    0.11
 -12   7  -8    0.18    0.15
 -12  -7   8    0.49    0.11
   0   8   8    0.01    0.05
   0  -8   8    0.06    0.04
  -1   8   8    8.81    0.30
   1   8   8    9.42    0.31
  -1   8  -8    9.28    0.46
  -1  -8   8    9.13    0.28
   1   8   8    8.86    0.27
  -2   8   8    2.67    0.15
  -2   8  -8    2.31    0.27
   2   8   8    2.70    0.13
  -2  -8   8    2.62    0.13
   2   8   8    2.83    0.16
  -3   8   8   13.59    0.41
  -3  -8   8   13.62    0.39
   3   8   8   14.25    0.41
  -3   8  -8   13.66    0.58
   3   8   8   14.53    0.38
  -4   8   8    7.05    0.26
  -4  -8   8    6.79    0.24
  -4   8  -8    6.89    0.29
  -4   8  -8    7.62    0.41
   4   8   8    7.20    0.26
   4   8   8    6.91    0.24
  -5   8   8    0.04    0.05
  -5  -8   8    0.18    0.06
  -5   8  -8    0.19    0.07
  -5   8  -8    0.24    0.14
   5   8   8    0.18    0.07
   5   8   8    0.20    0.06
  -6   8   8    5.86    0.25
   6   8   8    6.94    0.24
  -6   8  -8    6.15    0.38
  -6  -8   8    6.61    0.25
  -6   8  -8    6.45    0.28
  -7   8   8    0.15    0.06
  -7   8  -8    0.02    0.11
   7   8   8    0.00    0.06
  -7  -8   8   -0.02    0.05
  -8   8   8    1.01    0.12
  -8  -8   8    0.90    0.11
   8   8   8    0.98    0.11
  -8   8  -8    1.25    0.23
  -9   8   8   11.32    0.39
  -9  -8   8   11.59    0.40
   9   8   8   11.67    0.39
  -9   8  -8   11.72    0.57
 -10   8   8    3.81    0.21
  10   8   8    3.92    0.21
 -10   8  -8    3.35    0.36
 -10  -8   8    3.70    0.21
 -11   8  -8    0.20    0.14
  11   8   8    0.06    0.08
 -11  -8   8    0.26    0.09
 -12   8  -8    0.03    0.14
  12   8   8   -0.07    0.07
 -12  -8   8    0.03    0.08
   0   9   8    0.01    0.06
   0  -9   8    0.02    0.04
   0   9   8    0.00    0.04
  -1   9   8    0.35    0.08
  -1  -9   8    0.27    0.06
   1   9   8    0.25    0.05
   1   9   8    0.21    0.08
  -2   9   8    6.35    0.26
   2   9   8    6.03    0.21
  -2  -9   8    6.25    0.23
  -2   9  -8    5.63    0.39
   2   9   8    6.10    0.25
  -3   9   8    2.86    0.17
   3   9   8    2.95    0.14
  -3   9  -8    2.35    0.28
  -3  -9   8    2.95    0.15
   3   9   8    2.92    0.17
  -3   9  -8    2.80    0.20
  -4   9   8    0.90    0.11
  -4   9  -8    0.98    0.14
  -4  -9   8    0.89    0.10
  -4   9  -8    0.73    0.19
   4   9   8    1.09    0.13
   4   9   8    1.03    0.10
  -5   9   8    1.18    0.13
  -5   9  -8    1.38    0.24
  -5   9  -8    0.94    0.14
  -5  -9   8    0.83    0.10
   5   9   8    1.19    0.13
   5   9   8    0.97    0.10
  -6   9   8    1.50    0.15
  -6   9  -8    2.19    0.29
  -6  -9   8    1.68    0.15
   6   9   8    1.45    0.12
  -6   9  -8    1.44    0.16
  -7   9   8    1.69    0.16
  -7   9  -8    1.28    0.24
   7   9   8    1.84    0.15
  -7  -9   8    2.19    0.15
  -8   9   8    0.25    0.08
   8   9   8    0.54    0.09
  -8  -9   8    0.64    0.11
  -8   9  -8    0.42    0.17
  -9   9   8    1.25    0.14
   9   9   8    1.55    0.15
  -9  -9   8    1.51    0.16
  -9   9  -8    1.64    0.27
 -10   9   8    2.83    0.20
  10   9   8    2.92    0.19
 -10   9  -8    2.86    0.34
 -10  -9   8    2.89    0.20
 -11  -9   8   -0.07    0.06
  11   9   8   -0.01    0.07
 -11   9  -8    0.06    0.16
   0  10   8   35.87    0.91
   0 -10   8   35.57    0.85
  -1  10   8    2.20    0.16
   1 -10   8    2.01    0.12
   1  10   8    2.14    0.12
  -1 -10   8    2.15    0.13
   1  10   8    2.20    0.16
  -2  10   8    6.07    0.27
   2  10   8    6.29    0.22
  -2 -10   8    5.72    0.23
   2  10   8    6.22    0.27
  -2  10  -8    6.14    0.41
  -3  10   8    4.27    0.22
  -3  10  -8    4.97    0.26
   3  10   8    4.22    0.18
  -3 -10   8    4.03    0.19
   3  10   8    4.09    0.22
  -3  10  -8    3.89    0.38
  -4  10   8    0.12    0.08
   4  10   8    0.22    0.06
  -4  10  -8    0.14    0.13
  -4  10  -8    0.17    0.09
  -4 -10   8    0.11    0.05
   4  10   8    0.20    0.08
  -5  10   8    1.26    0.15
   5  10   8    1.15    0.11
  -5 -10   8    1.13    0.12
  -5  10  -8    1.11    0.24
  -5  10  -8    1.09    0.15
  -6  10   8    0.85    0.13
  -6  10  -8    0.76    0.13
  -6  10  -8    0.90    0.22
  -6 -10   8    0.78    0.11
   6  10   8    0.94    0.11
  -7  10   8    9.82    0.37
   7  10   8   10.34    0.35
  -7 -10   8   10.39    0.36
  -7  10  -8   10.55    0.57
  -8  10   8    4.83    0.25
  -8 -10   8    4.24    0.22
   8  10   8    4.21    0.22
  -8  10  -8    4.33    0.42
  -9  10   8    2.14    0.19
   9  10   8    2.40    0.17
  -9 -10   8    2.44    0.18
  -9  10  -8    2.50    0.33
 -10  10   8    4.70    0.26
 -10 -10   8    5.02    0.27
  10  10   8    4.56    0.24
 -10  10  -8    4.75    0.45
   0 -11   8    0.00    0.05
   0  11   8    0.06    0.07
  -1  11   8    0.56    0.11
   1 -11   8    0.40    0.08
  -1 -11   8    0.37    0.07
   1  11   8    0.54    0.11
  -2  11   8    0.08    0.08
   2  11   8    0.19    0.09
  -2 -11   8    0.15    0.06
  -3  11   8   -0.02    0.07
  -3  11  -8   -0.04    0.14
   3  11   8    0.01    0.07
  -3  11  -8   -0.02    0.07
  -3 -11   8    0.03    0.05
  -4  11   8    1.04    0.14
  -4  11  -8    1.22    0.17
   4  11   8    1.20    0.13
  -4  11  -8    1.30    0.25
  -4 -11   8    0.98    0.11
   4  11   8    0.90    0.13
  -5  11   8    0.50    0.12
  -5  11  -8    0.40    0.12
   5  11   8    0.28    0.07
  -5 -11   8    0.38    0.08
  -5  11  -8    0.27    0.15
  -6  11   8    0.36    0.11
   6  11   8    0.51    0.09
  -6 -11   8    0.41    0.09
  -6  11  -8    0.43    0.12
  -6  11  -8    0.54    0.20
  -7  11   8    1.15    0.16
   7  11   8    1.42    0.14
  -7 -11   8    1.43    0.15
  -7  11  -8    1.51    0.29
  -8  11   8    0.98    0.15
  -8 -11   8    0.73    0.12
   8  11   8    0.90    0.12
  -8  11  -8    0.56    0.22
  -9  11   8    2.33    0.21
  -9 -11   8    2.21    0.17
   9  11   8    2.03    0.18
  -9  11  -8    2.05    0.32
 -10  11   8    1.09    0.16
  10  11   8    1.11    0.14
   0  12   8    3.05    0.22
   0 -12   8    3.33    0.17
  -1  12   8   -0.05    0.07
   1 -12   8    0.07    0.06
  -1 -12   8    0.11    0.06
   1  12   8    0.00    0.07
  -2  12   8    1.28    0.16
   2 -12   8    1.39    0.13
   2  12   8    1.02    0.15
  -2 -12   8    1.23    0.13
  -3  12   8    0.59    0.12
  -3  12  -8    0.64    0.14
  -3 -12   8    0.57    0.09
   3  12   8    0.58    0.12
  -3  12  -8    0.50    0.20
  -4  12   8    0.16    0.10
  -4  12  -8    0.12    0.15
   4  12   8    0.18    0.09
  -4 -12   8    0.10    0.06
  -4  12  -8    0.22    0.11
  -5  12   8    4.43    0.26
  -5 -12   8    4.12    0.21
  -5  12  -8    4.16    0.28
  -5  12  -8    3.89    0.42
  -6  12   8    1.15    0.16
  -6  12  -8    1.22    0.19
  -6  12  -8    1.24    0.27
  -6 -12   8    1.09    0.13
  -7  12   8    2.31    0.22
  -7 -12   8    2.59    0.18
  -7  12  -8    2.69    0.37
  -8  12   8    0.04    0.09
  -8  12  -8   -0.28    0.14
  -8 -12   8   -0.03    0.07
   0  13   8   -0.05    0.08
   0 -13   8    0.09    0.06
  -1  13   8    0.65    0.13
   1 -13   8    0.83    0.11
   1  13   8    0.73    0.14
  -1 -13   8    0.61    0.10
   2 -13   8    3.08    0.17
  -2  13   8    2.95    0.23
  -2 -13   8    3.10    0.18
   2  13   8    3.35    0.24
   3 -13   8    0.36    0.08
  -3  13   8    0.15    0.11
  -3 -13   8    0.23    0.08
   3  13   8    0.29    0.11
  -4  13   8    4.57    0.28
  -4  13  -8    4.09    0.29
  -4  13  -8    3.72    0.41
   4  13   8    4.35    0.27
  -4 -13   8    4.39    0.22
  -5  13   8    1.60    0.19
  -5  13  -8    1.77    0.32
  -5 -13   8    1.98    0.15
  -5  13  -8    1.87    0.23
  -6  13   8    1.77    0.20
  -6  13  -8    1.93    0.32
  -6 -13   8    2.06    0.18
  -7 -13   8    0.01    0.06
  -7  13  -8   -0.05    0.19
   0 -14   8    0.20    0.08
   0  14   8    0.28    0.12
   1 -14   8    0.80    0.11
  -1  14   8    0.69    0.14
   1  14   8    0.61    0.14
  -1 -14   8    0.83    0.11
  -2  14   8    1.02    0.17
   2 -14   8    1.13    0.13
  -2 -14   8    0.75    0.11
   2  14   8    0.95    0.16
  -3  14   8    1.83    0.21
   3 -14   8    2.51    0.16
  -3 -14   8    2.05    0.16
   3  14   8    2.32    0.24
  -4 -14   8    1.61    0.16
   4  14   8    2.01    0.23
  -5 -14   8   -0.08    0.06
  -5  14  -8   -0.05    0.10
  -5  14  -8    0.18    0.20
   0 -15   8    0.11    0.07
   1 -15   8    6.92    0.29
  -1 -15   8    7.51    0.30
   2 -15   8    0.18    0.08
  -2 -15   8    0.10    0.08
   0   0  -9    0.16    0.07
  -1   0  -9   -0.02    0.05
  -2   0  -9    0.04    0.05
   2   0   9    0.03    0.02
  -2   0   9   -0.02    0.01
   3   0   9    0.00    0.02
  -3   0   9    0.00    0.02
  -3   0  -9   -0.05    0.05
  -3   0   9   -0.01    0.03
   3   0   9   -0.02    0.02
   4   0   9    0.01    0.03
   4   0   9    0.00    0.02
  -4   0   9   -0.01    0.03
  -4   0   9   -0.05    0.02
  -4   0  -9   -0.04    0.05
  -5   0   9   -0.04    0.02
  -5   0  -9    0.00    0.05
  -5   0   9    0.01    0.03
   5   0   9   -0.01    0.03
   6   0   9    0.03    0.03
  -6   0   9    0.03    0.03
  -6   0  -9   -0.06    0.05
  -6   0   9   -0.01    0.03
  -7   0   9   -0.04    0.03
  -7   0  -9   -0.07    0.06
   7   0   9   -0.01    0.03
  -7   0   9    0.01    0.04
  -8   0  -9   -0.08    0.06
  -8   0   9   -0.08    0.03
  -8   0   9    0.01    0.04
   8   0   9    0.01    0.03
  -9   0   9    0.05    0.05
  -9   0  -9    0.05    0.07
   9   0   9   -0.08    0.03
  -9   0   9   -0.05    0.04
 -10   0  -9   -0.11    0.07
  10   0   9    0.04    0.05
 -10   0   9    0.06    0.05
 -10   0   9    0.02    0.04
 -11   0  -9    0.00    0.07
  11   0   9    0.00    0.05
 -11   0   9   -0.01    0.05
 -12   0  -9    0.06    0.09
 -12   0   9   -0.08    0.05
 -13   0   9   -0.04    0.06
 -13   0  -9    0.10    0.10
 -14   0  -9   -0.10    0.10
 -14   0   9   -0.01    0.08
   0   1   9   -0.04    0.02
   0   1  -9    0.04    0.06
  -1   1   9    0.07    0.03
  -1  -1  -9    0.06    0.05
  -1   1   9    0.05    0.02
  -1  -1   9    0.07    0.02
   1   1   9    0.07    0.02
  -1   1  -9    0.12    0.07
  -2   1   9    1.98    0.07
  -2  -1  -9    2.21    0.13
  -2   1   9    1.91    0.10
  -2   1  -9    2.05    0.15
  -2  -1   9    1.89    0.08
   2   1   9    1.81    0.08
  -3   1   9    6.28    0.21
   3  -1   9    6.39    0.18
  -3   1   9    6.39    0.18
  -3  -1  -9    6.19    0.22
  -3   1  -9    6.92    0.27
  -3  -1   9    6.33    0.18
   3   1   9    6.59    0.19
   3   1   9    6.39    0.18
   4  -1   9    9.38    0.25
  -4   1   9    8.80    0.27
  -4   1   9    8.93    0.24
  -4  -1  -9    9.07    0.30
   4   1   9    9.13    0.23
  -4   1  -9    9.22    0.33
  -4  -1   9    9.21    0.25
   4   1   9    9.39    0.26
   5  -1   9   21.01    0.50
  -5  -1  -9   20.98    0.56
  -5   1   9   21.11    0.54
  -5   1   9   21.21    0.50
   5   1   9   22.00    0.51
  -5  -1   9   21.47    0.51
  -5   1  -9   20.46    0.59
  -6   1   9    8.22    0.25
  -6  -1  -9    8.61    0.30
  -6   1   9    8.51    0.27
   6  -1   9    8.96    0.25
   6   1   9    8.62    0.26
  -6   1  -9    8.72    0.33
  -6  -1   9    8.22    0.26
   7  -1   9    0.02    0.03
  -7  -1  -9   -0.04    0.05
  -7   1   9    0.01    0.04
  -7   1   9    0.06    0.04
   7   1   9    0.01    0.03
  -7   1  -9    0.00    0.06
  -7  -1   9    0.01    0.04
  -7  -1   9   -0.01    0.04
  -8   1   9   22.34    0.57
   8  -1   9   21.83    0.55
  -8  -1  -9   22.09    0.63
  -8   1   9   22.64    0.58
  -8   1  -9   23.27    0.67
   8   1   9   21.53    0.56
  -8  -1   9   22.06    0.58
  -8  -1   9   22.88    0.58
  -9   1   9    1.95    0.13
  -9   1   9    2.26    0.14
   9  -1   9    2.33    0.13
  -9  -1  -9    2.22    0.19
  -9   1  -9    2.08    0.20
  -9  -1   9    1.96    0.13
   9   1   9    2.19    0.14
  -9  -1   9    2.26    0.14
 -10   1   9    2.23    0.14
 -10  -1  -9    2.25    0.20
  10  -1   9    1.93    0.13
 -10   1   9    2.07    0.14
  10   1   9    2.39    0.15
 -10  -1   9    2.23    0.14
 -10   1  -9    1.93    0.20
 -10  -1   9    2.13    0.15
 -11   1   9   -0.01    0.06
 -11  -1  -9    0.07    0.08
  11  -1   9    0.02    0.05
  11   1   9   -0.04    0.05
 -11  -1   9   -0.01    0.05
 -11   1  -9    0.05    0.09
 -12  -1  -9    1.34    0.19
 -12   1   9    1.57    0.16
 -12   1  -9    1.47    0.20
  12   1   9    1.48    0.14
 -12  -1   9    1.63    0.17
 -13  -1  -9    0.25    0.11
 -13   1   9    0.19    0.08
 -13   1  -9    0.22    0.11
 -13  -1   9    0.16    0.08
 -14  -1  -9    2.21    0.25
 -14   1   9    2.25    0.21
 -14   1  -9    1.91    0.24
 -14  -1   9    2.85    0.21
   0   2  -9   41.74    1.08
   0   2   9   44.12    0.91
   0   2   9   44.13    0.96
  -1   2   9   22.12    0.53
  -1  -2  -9   22.37    0.53
  -1   2   9   21.98    0.47
   1   2   9   22.09    0.52
  -1   2  -9   22.94    0.64
  -1  -2   9   21.67    0.51
  -2  -2  -9   39.08    0.90
  -2   2   9   39.79    0.85
  -2   2   9   40.67    0.90
   2   2   9   40.19    0.87
  -2  -2   9   40.98    0.88
  -2   2  -9   38.32    1.00
   3  -2   9    0.04    0.02
  -3  -2  -9    0.01    0.04
  -3   2   9    0.02    0.02
  -3   2   9   -0.01    0.03
   3   2   9    0.07    0.02
   3   2   9    0.00    0.03
  -3   2  -9    0.07    0.07
  -3  -2   9    0.01    0.02
  -4   2   9    0.79    0.08
   4  -2   9    0.81    0.06
  -4  -2  -9    0.80    0.09
  -4   2   9    0.74    0.05
  -4  -2   9    0.77    0.07
  -4   2  -9    0.75    0.11
   4   2   9    0.66    0.05
   4   2   9    0.59    0.06
  -5   2   9    6.03    0.19
  -5  -2  -9    5.92    0.22
  -5   2   9    6.38    0.22
   5  -2   9    6.29    0.19
  -5   2  -9    6.49    0.29
  -5  -2   9    6.18    0.20
   5   2   9    6.43    0.20
  -6   2   9    1.71    0.11
   6  -2   9    1.42    0.09
  -6   2   9    1.47    0.09
  -6  -2  -9    1.60    0.12
  -6   2  -9    1.83    0.18
  -6  -2   9    1.56    0.10
   6   2   9    1.72    0.10
  -7   2   9    0.02    0.04
  -7   2   9    0.06    0.04
   7  -2   9    0.06    0.03
  -7  -2  -9    0.09    0.06
  -7  -2   9    0.02    0.04
  -7   2  -9    0.01    0.07
   7   2   9    0.01    0.04
  -8   2   9   21.37    0.56
  -8  -2  -9   21.37    0.60
  -8   2   9   21.72    0.56
   8  -2   9   21.79    0.54
   8   2   9   21.88    0.56
  -8   2  -9   21.63    0.67
  -8  -2   9   22.25    0.57
  -9   2   9    0.98    0.10
  -9   2   9    1.42    0.13
  -9  -2  -9    1.21    0.14
   9  -2   9    1.33    0.10
   9   2   9    1.28    0.12
  -9   2  -9    1.24    0.16
  -9  -2   9    1.11    0.12
  -9  -2   9    1.38    0.13
 -10  -2  -9    0.44    0.11
  10  -2   9    0.40    0.07
 -10   2   9    0.50    0.08
 -10   2   9    0.54    0.09
  10   2   9    0.47    0.08
 -10   2  -9    0.49    0.12
 -10  -2   9    0.26    0.08
 -10  -2   9    0.48    0.08
 -11  -2  -9    0.14    0.08
 -11   2   9    0.21    0.07
  11   2   9    0.10    0.06
 -11   2  -9    0.28    0.11
 -11  -2   9    0.19    0.07
 -12   2   9    2.65    0.18
 -12  -2  -9    2.63    0.23
 -12  -2   9    3.12    0.19
 -12   2  -9    2.49    0.26
  12   2   9    2.65    0.18
 -13  -2  -9    0.19    0.11
 -13   2   9    0.38    0.10
 -13   2  -9    0.17    0.13
 -13  -2   9    0.16    0.09
 -14   2   9    0.08    0.08
 -14  -2  -9    0.18    0.11
 -14  -2   9    0.18    0.09
 -14   2  -9    0.17    0.13
   0   3  -9    0.04    0.07
   0   3   9    0.00    0.03
  -1  -3  -9    0.84    0.07
  -1   3   9    0.74    0.07
  -1   3   9    0.83    0.03
   1   3   9    0.80    0.06
  -1  -3   9    0.76    0.06
  -1   3  -9    0.85    0.14
  -2  -3  -9   14.09    0.34
  -2   3   9   13.40    0.36
  -2   3   9   13.49    0.30
   2   3   9   13.11    0.33
  -2   3  -9   11.94    0.45
  -2  -3   9   13.65    0.34
   3  -3   9   11.21    0.27
  -3  -3  -9   11.01    0.30
  -3   3   9   10.62    0.31
  -3   3   9   11.08    0.26
  -3   3  -9   10.50    0.40
   3   3   9   10.81    0.30
   3   3   9   10.95    0.28
  -3  -3   9   10.81    0.29
  -4  -3  -9    1.60    0.10
  -4   3   9    1.64    0.08
   4  -3   9    1.48    0.07
  -4   3   9    1.61    0.10
  -4  -3   9    1.44    0.09
   4   3   9    1.50    0.07
  -4   3  -9    1.68    0.17
  -5   3   9    0.87    0.06
  -5  -3  -9    0.79    0.08
  -5   3   9    0.64    0.08
   5  -3   9    0.75    0.06
   5   3   9    0.73    0.07
  -5  -3   9    0.82    0.08
  -5   3  -9    0.75    0.12
  -6   3   9    3.05    0.13
   6  -3   9    3.24    0.12
  -6   3   9    3.02    0.15
  -6  -3  -9    2.93    0.15
   6   3   9    3.23    0.14
  -6   3  -9    2.87    0.20
  -6  -3   9    3.14    0.14
  -7   3   9   13.19    0.36
  -7  -3  -9   12.96    0.39
   7  -3   9   13.24    0.35
  -7   3   9   12.79    0.38
  -7   3  -9   13.15    0.47
   7   3   9   12.93    0.37
  -7  -3   9   13.24    0.38
  -8   3   9   35.60    0.84
   8  -3   9   34.88    0.81
  -8   3   9   33.84    0.84
  -8  -3  -9   35.64    0.88
  -8  -3   9   34.28    0.85
  -8   3  -9   34.23    0.96
   8   3   9   36.35    0.84
  -9   3   9    2.63    0.16
  -9  -3  -9    2.37    0.17
  -9   3   9    2.58    0.14
   9  -3   9    2.42    0.13
  -9  -3   9    2.78    0.16
  -9   3  -9    2.67    0.25
   9   3   9    2.16    0.14
 -10   3   9    0.70    0.09
 -10  -3  -9    0.50    0.10
 -10   3   9    0.56    0.09
 -10  -3   9    0.61    0.09
 -10   3  -9    0.60    0.15
  10   3   9    0.74    0.10
 -11   3   9   -0.07    0.05
 -11  -3  -9    0.05    0.07
 -11   3   9    0.05    0.05
 -11   3  -9   -0.04    0.09
  11   3   9    0.03    0.06
 -11  -3   9    0.00    0.05
 -12  -3  -9    0.79    0.13
 -12   3   9    0.95    0.13
 -12  -3   9    0.98    0.13
 -12   3  -9    0.85    0.18
  12   3   9    0.83    0.12
 -13   3   9    1.07    0.15
 -13  -3  -9    0.83    0.14
 -13   3  -9    0.62    0.17
 -13  -3   9    1.09    0.14
 -14  -3  -9    1.47    0.20
 -14  -3   9    1.12    0.18
   0   4   9  458.01    9.44
   0   4  -9  448.20    9.52
  -1   4   9    9.02    0.26
  -1   4  -9    8.45    0.38
   1   4   9    9.08    0.25
  -1  -4   9    9.39    0.25
  -2  -4  -9   18.18    0.41
  -2   4   9   17.66    0.45
  -2   4  -9   16.86    0.58
  -2  -4   9   17.13    0.43
   2   4   9   17.90    0.43
   2   4   9   17.96    0.44
  -3   4   9    5.69    0.20
   3  -4   9    5.70    0.15
  -3  -4  -9    5.81    0.18
  -3  -4   9    5.42    0.18
   3   4   9    5.47    0.19
  -3   4  -9    5.39    0.29
   3   4   9    5.67    0.17
  -4   4   9    6.58    0.23
  -4  -4  -9    7.22    0.22
   4  -4   9    7.11    0.19
  -4   4   9    7.22    0.21
   4   4   9    6.93    0.22
   4   4   9    7.12    0.20
  -4  -4   9    6.92    0.22
  -4   4  -9    6.99    0.33
   5  -4   9    0.99    0.06
  -5  -4  -9    1.03    0.09
  -5   4   9    1.16    0.08
  -5   4   9    0.80    0.08
  -5   4  -9    0.97    0.14
  -5  -4   9    1.11    0.08
   5   4   9    1.11    0.08
  -6   4   9    9.54    0.28
  -6   4   9    9.23    0.30
  -6  -4  -9    9.67    0.30
   6  -4   9    9.20    0.25
  -6   4  -9    9.28    0.40
   6   4   9    9.59    0.29
  -6  -4   9    9.38    0.29
  -7   4   9    1.59    0.11
  -7   4   9    1.76    0.11
  -7  -4  -9    1.42    0.13
  -7   4  -9    1.63    0.19
   7   4   9    1.59    0.11
  -7  -4   9    1.67    0.11
  -8   4   9    4.80    0.20
  -8   4   9    4.86    0.20
  -8  -4  -9    5.10    0.22
   8   4   9    4.64    0.20
  -8   4  -9    4.60    0.29
  -8  -4   9    5.12    0.21
  -9   4   9    0.53    0.10
  -9  -4  -9    0.48    0.09
  -9   4   9    0.56    0.09
   9   4   9    0.56    0.09
  -9   4  -9    0.63    0.14
  -9  -4   9    0.46    0.08
 -10  -4  -9    0.82    0.12
 -10   4   9    0.80    0.10
 -10   4  -9    0.90    0.17
  10   4   9    0.95    0.11
 -10  -4   9    0.76    0.11
 -11   4   9    0.02    0.05
 -11  -4  -9   -0.02    0.07
 -11  -4   9   -0.04    0.06
  11   4   9    0.10    0.06
 -11   4  -9    0.14    0.12
 -12  -4  -9    5.91    0.30
  12   4   9    5.61    0.26
 -12   4  -9    5.64    0.37
 -12  -4   9    6.00    0.28
 -13  -4  -9    0.54    0.12
 -13  -4   9    0.45    0.10
  13   4   9    0.37    0.10
 -13   4  -9    0.47    0.16
 -14  -4  -9    0.62    0.14
   0   5   9   -0.02    0.03
  -1   5   9   23.44    0.57
  -1   5  -9   24.22    0.74
  -1  -5   9   23.15    0.56
   1   5   9   23.00    0.56
  -2   5   9    4.17    0.16
   2  -5   9    4.06    0.11
  -2   5  -9    4.29    0.27
   2   5   9    4.17    0.15
  -2  -5   9    3.94    0.15
   2   5   9    3.87    0.15
  -3   5   9   -0.02    0.03
   3   5   9    0.01    0.03
   3   5   9    0.03    0.03
  -3   5  -9    0.01    0.09
  -3  -5   9   -0.02    0.03
  -4   5   9    3.46    0.15
  -4  -5   9    3.14    0.14
   4   5   9    3.13    0.13
  -4   5  -9    3.18    0.24
   4   5   9    3.13    0.14
  -5   5   9    2.29    0.13
   5   5   9    2.47    0.13
  -5  -5   9    2.56    0.13
  -5   5  -9    2.21    0.23
  -6  -5  -9   21.12    0.55
  -6   5   9   21.03    0.55
  -6  -5   9   21.73    0.55
   6   5   9   20.55    0.54
  -6   5  -9   19.81    0.68
  -7   5   9    1.56    0.12
  -7  -5  -9    1.37    0.12
  -7  -5   9    1.71    0.12
  -7   5  -9    1.91    0.23
   7   5   9    1.57    0.12
  -8  -5  -9    0.05    0.05
  -8   5   9    0.06    0.05
  -8   5  -9    0.11    0.11
  -8  -5   9   -0.02    0.05
   8   5   9   -0.03    0.04
  -9  -5  -9    0.22    0.07
  -9   5   9    0.16    0.06
   9   5   9    0.25    0.07
  -9   5  -9    0.35    0.14
  -9  -5   9    0.18    0.06
 -10   5   9    3.91    0.19
 -10  -5  -9    4.15    0.22
 -10   5  -9    3.99    0.31
  10   5   9    3.79    0.20
 -10  -5   9    3.86    0.21
 -11   5   9    0.10    0.06
 -11  -5  -9    0.18    0.08
  11   5   9    0.08    0.07
 -11  -5   9    0.07    0.06
 -11   5  -9   -0.01    0.11
 -12  -5  -9    1.43    0.17
 -12  -5   9    1.50    0.17
  12   5   9    1.22    0.14
 -12   5  -9    1.28    0.22
 -13  -5  -9   -0.03    0.08
 -13   5  -9    0.24    0.15
 -13  -5   9    0.03    0.07
  13   5   9   -0.06    0.07
   0   6   9    1.45    0.10
  -1   6   9   -0.03    0.03
  -1   6  -9    0.07    0.10
  -1  -6   9   -0.01    0.03
   1   6   9    0.02    0.03
  -2   6   9    8.85    0.27
  -2   6  -9    8.22    0.41
   2   6   9    8.63    0.26
  -2  -6   9    8.88    0.26
   2   6   9    8.81    0.27
  -3   6   9    0.19    0.05
   3   6   9    0.15    0.04
  -3   6  -9    0.12    0.10
   3   6   9    0.07    0.04
  -3  -6   9    0.12    0.04
  -4   6   9    4.72    0.19
  -4  -6   9    5.26    0.19
   4   6   9    5.06    0.19
  -4   6  -9    4.51    0.30
   4   6   9    5.20    0.19
  -5   6   9   10.68    0.33
   5   6   9    9.78    0.31
  -5   6  -9   10.20    0.45
  -5  -6   9   10.31    0.31
  -6   6   9   11.89    0.36
   6   6   9   11.58    0.35
  -6   6  -9   11.15    0.49
  -6  -6   9   11.92    0.36
  -7   6   9    0.06    0.05
   7   6   9    0.07    0.05
  -7   6  -9    0.13    0.10
  -7  -6   9    0.10    0.06
  -8   6   9    1.00    0.11
  -8  -6   9    1.11    0.12
  -8   6  -9    0.82    0.17
   8   6   9    0.86    0.10
  -9   6   9    0.74    0.10
  -9  -6   9    0.78    0.11
  -9   6  -9    0.42    0.15
   9   6   9    0.73    0.10
 -10   6   9   -0.03    0.05
 -10   6  -9    0.20    0.14
 -10  -6   9    0.16    0.07
  10   6   9    0.09    0.06
 -11   6   9    0.10    0.07
  11   6   9    0.17    0.08
 -11  -6   9    0.01    0.06
 -11   6  -9    0.07    0.13
  12   6   9    0.51    0.11
 -12   6  -9    0.62    0.19
 -12  -6   9    0.44    0.10
   0  -7   9    0.00    0.03
   0   7   9    0.06    0.05
  -1   7   9    0.12    0.05
  -1   7  -9    0.02    0.11
  -1  -7   9    0.19    0.05
   1   7   9    0.10    0.05
   1   7   9    0.15    0.04
  -2   7   9    2.01    0.12
  -2  -7   9    2.00    0.11
  -2   7  -9    1.98    0.24
   2   7   9    2.03    0.11
   2   7   9    1.97    0.12
  -3   7   9    0.42    0.07
  -3  -7   9    0.32    0.06
   3   7   9    0.36    0.07
  -3   7  -9    0.25    0.12
   3   7   9    0.39    0.06
  -4   7   9    9.90    0.32
   4   7   9   10.91    0.31
  -4  -7   9   10.48    0.32
   4   7   9   10.37    0.32
  -4   7  -9   10.07    0.48
  -5   7   9    3.04    0.16
  -5   7  -9    3.18    0.31
   5   7   9    3.23    0.16
  -5  -7   9    3.23    0.16
  -6   7   9    2.62    0.15
   6   7   9    2.69    0.15
  -6   7  -9    2.16    0.25
  -6  -7   9    2.78    0.15
  -7   7   9    0.07    0.05
  -7   7  -9    0.19    0.13
  -7  -7   9    0.08    0.05
   7   7   9    0.07    0.06
  -8   7   9    0.05    0.05
  -8  -7   9    0.07    0.06
   8   7   9   -0.02    0.05
  -8   7  -9    0.18    0.13
  -9   7   9    2.51    0.16
  -9   7  -9    2.89    0.31
   9   7   9    2.72    0.17
  -9  -7   9    2.57    0.17
 -10   7   9    9.72    0.35
  10   7   9    9.99    0.35
 -10  -7   9    9.81    0.37
 -10   7  -9   10.17    0.52
 -11   7   9    0.05    0.06
 -11   7  -9    0.11    0.13
 -11  -7   9    0.20    0.08
  11   7   9    0.09    0.08
  12   7   9    0.44    0.10
 -12   7  -9    0.54    0.20
 -12  -7   9    0.38    0.11
   0  -8   9  108.13    2.32
   0   8   9  108.37    2.35
  -1   8   9    0.09    0.05
   1   8   9    0.00    0.06
   1   8   9    0.08    0.04
  -1   8  -9    0.14    0.12
  -1  -8   9    0.05    0.05
  -2   8   9   -0.02    0.04
   2   8   9    0.03    0.04
  -2  -8   9    0.09    0.05
  -2   8  -9    0.14    0.12
   2   8   9    0.01    0.05
  -3   8   9   14.20    0.43
   3   8   9   14.24    0.39
   3   8   9   14.36    0.42
  -3  -8   9   14.50    0.41
  -3   8  -9   15.07    0.62
  -4   8   9    4.00    0.19
  -4   8  -9    4.25    0.34
   4   8   9    4.43    0.18
   4   8   9    4.25    0.20
  -4  -8   9    3.83    0.18
  -5   8   9    0.08    0.06
   5   8   9   -0.03    0.04
  -5  -8   9    0.01    0.04
  -5   8  -9   -0.08    0.09
  -6   8   9   30.71    0.78
  -6  -8   9   29.99    0.77
   6   8   9   30.73    0.76
  -6   8  -9   30.68    0.99
  -7   8   9    0.57    0.10
  -7  -8   9    0.63    0.09
  -7   8  -9    0.54    0.17
   7   8   9    0.61    0.09
  -8   8   9    0.09    0.06
   8   8   9    0.17    0.06
  -8   8  -9    0.21    0.15
  -8  -8   9    0.11    0.07
  -9   8   9    1.23    0.13
  -9  -8   9    1.31    0.15
   9   8   9    1.51    0.15
  -9   8  -9    1.49    0.24
 -10   8   9    0.14    0.08
 -10   8  -9    0.04    0.14
  10   8   9   -0.02    0.06
 -10  -8   9    0.09    0.07
 -11   8   9    1.59    0.16
 -11   8  -9    1.90    0.29
  11   8   9    1.81    0.17
 -11  -8   9    1.86    0.19
   0  -9   9   -0.08    0.03
   0   9   9    0.00    0.04
   0   9   9   -0.03    0.05
  -1   9   9    3.22    0.18
  -1  -9   9    3.15    0.15
   1   9   9    3.26    0.14
   1   9   9    2.98    0.17
  -2   9   9   -0.04    0.05
   2   9   9   -0.01    0.04
  -2   9  -9   -0.11    0.10
   2   9   9   -0.06    0.06
  -2  -9   9    0.04    0.04
  -3   9   9    0.18    0.07
  -3  -9   9    0.21    0.06
   3   9   9    0.17    0.07
   3   9   9    0.19    0.05
  -3   9  -9    0.41    0.17
  -4   9   9    2.20    0.15
   4   9   9    2.17    0.13
   4   9   9    2.29    0.16
  -4  -9   9    2.04    0.13
  -4   9  -9    2.42    0.30
  -5   9   9    1.24    0.14
   5   9   9    0.95    0.10
  -5  -9   9    1.08    0.11
  -5   9  -9    0.86    0.20
  -6   9   9   13.36    0.44
  -6   9  -9   14.08    0.63
   6   9   9   13.22    0.41
  -6  -9   9   14.37    0.43
  -7   9   9    6.49    0.28
  -7   9  -9    6.69    0.43
  -7  -9   9    6.86    0.27
   7   9   9    6.34    0.26
  -8   9   9    3.03    0.19
  -8  -9   9    3.33    0.19
   8   9   9    3.12    0.19
  -8   9  -9    3.71    0.38
  -9   9   9    0.00    0.07
  -9  -9   9    0.05    0.06
  -9   9  -9    0.11    0.16
   9   9   9   -0.04    0.06
 -10   9   9    4.53    0.24
 -10  -9   9    4.67    0.25
  10   9   9    4.34    0.23
 -10   9  -9    3.64    0.39
 -11   9   9    8.03    0.38
 -11   9  -9   10.07    0.65
  11   9   9    9.21    0.36
 -11  -9   9    8.52    0.50
   0  10   9    0.01    0.07
   0  10   9    0.05    0.04
   0 -10   9    0.04    0.05
  -1  10   9    0.33    0.09
   1 -10   9    0.32    0.07
   1  10   9    0.29    0.06
   1  10   9    0.22    0.08
  -1 -10   9    0.30    0.06
  -2  10   9   -0.07    0.06
  -2  10  -9    0.06    0.13
  -2 -10   9   -0.03    0.04
   2  10   9    0.06    0.05
   2  10   9    0.03    0.06
  -3  10   9    0.12    0.07
  -3 -10   9    0.08    0.05
   3  10   9    0.07    0.05
  -3  10  -9    0.00    0.13
   3  10   9    0.03    0.07
  -4  10   9   -0.01    0.06
  -4 -10   9    0.04    0.05
   4  10   9    0.00    0.07
  -4  10  -9    0.16    0.13
   4  10   9    0.01    0.05
  -5  10   9    4.40    0.23
  -5  10  -9    4.19    0.41
   5  10   9    4.27    0.20
  -5 -10   9    4.42    0.21
  -6  10   9    2.20    0.17
  -6  10  -9    2.67    0.34
   6  10   9    2.08    0.14
  -6 -10   9    1.97    0.15
  -7  10   9    0.42    0.10
   7  10   9    0.29    0.08
  -7 -10   9    0.39    0.08
  -7  10  -9    0.10    0.15
  -8  10   9   -0.08    0.06
  -8  10  -9    0.03    0.14
   8  10   9    0.01    0.06
  -8 -10   9    0.00    0.05
  -9  10   9    5.90    0.29
  -9  10  -9    6.08    0.47
  -9 -10   9    6.19    0.28
   9  10   9    6.16    0.27
 -10  10   9   -0.06    0.07
 -10  10  -9    0.11    0.17
  10  10   9    0.40    0.10
 -10 -10   9    0.06    0.07
   0  11   9    0.02    0.06
   0 -11   9   -0.01    0.05
   1 -11   9    0.02    0.05
  -1  11   9    0.05    0.07
  -1 -11   9    0.02    0.05
   1  11   9   -0.02    0.06
  -2  11   9    1.96    0.18
  -2 -11   9    1.82    0.13
   2  11   9    1.75    0.17
  -3  11   9    2.42    0.18
  -3  11  -9    2.43    0.32
  -3 -11   9    2.55    0.16
   3  11   9    2.64    0.19
  -4  11   9    0.03    0.07
  -4  11  -9    0.02    0.14
   4  11   9    0.05    0.05
   4  11   9    0.06    0.07
  -4 -11   9    0.01    0.06
  -5  11   9    2.17    0.20
   5  11   9    2.77    0.16
  -5  11  -9    2.46    0.33
  -5 -11   9    2.89    0.17
  -6  11   9    0.65    0.12
  -6  11  -9    0.87    0.23
   6  11   9    0.74    0.10
  -6 -11   9    0.94    0.12
  -7  11   9    0.82    0.14
   7  11   9    0.67    0.10
  -7 -11   9    0.62    0.11
  -7  11  -9    0.97    0.26
  -8  11   9    0.93    0.16
  -8  11  -9    1.00    0.27
  -8 -11   9    1.11    0.14
   8  11   9    1.22    0.14
  -9  11   9    2.89    0.23
  -9 -11   9    2.86    0.21
   9  11   9    2.67    0.19
  -9  11  -9    2.53    0.36
 -10  11   9    5.57    0.35
   0 -12   9    0.92    0.11
   0  12   9    0.90    0.14
  -1  12   9    0.67    0.13
   1 -12   9    0.81    0.11
   1  12   9    0.94    0.15
  -1 -12   9    0.68    0.10
   2 -12   9    3.93    0.19
  -2  12   9    3.40    0.22
   2  12   9    3.83    0.23
  -2 -12   9    3.57    0.19
  -3  12   9    0.11    0.09
  -3 -12   9    0.02    0.05
   3  12   9    0.07    0.08
  -3  12  -9    0.00    0.16
  -4  12   9    0.27    0.10
   4  12   9    0.10    0.09
  -4  12  -9    0.32    0.17
  -4 -12   9    0.41    0.08
  -5  12   9    0.29    0.11
  -5 -12   9    0.38    0.09
  -5  12  -9    0.25    0.17
  -6  12   9    3.16    0.24
  -6 -12   9    3.75    0.21
  -6  12  -9    4.30    0.44
  -7  12   9    1.33    0.17
  -7  12  -9    1.89    0.33
  -7 -12   9    1.30    0.15
  -8  12   9    0.48    0.12
  -8  12  -9    0.56    0.24
  -8 -12   9    0.54    0.16
   9  12   9    0.31    0.09
   0  13   9   -0.09    0.08
   0 -13   9    0.00    0.05
  -1  13   9    0.36    0.12
   1 -13   9    0.47    0.09
  -1 -13   9    0.36    0.08
   1  13   9    0.42    0.12
  -2  13   9    0.31    0.11
   2 -13   9    0.57    0.10
  -2 -13   9    0.47    0.09
   2  13   9    0.44    0.12
   3 -13   9    0.35    0.08
  -3  13   9    0.37    0.12
  -3 -13   9    0.41    0.09
   3  13   9    0.28    0.10
  -4  13   9    3.21    0.23
   4  13   9    3.04    0.24
  -4  13  -9    3.01    0.38
  -4 -13   9    2.95    0.19
  -5  13   9    0.45    0.12
  -5  13  -9    0.71    0.24
  -5 -13   9    0.37    0.09
  -6  13  -9    0.32    0.22
  -6 -13   9    0.27    0.09
   0 -14   9   -0.05    0.05
   0  14   9    0.06    0.10
   1 -14   9    3.35    0.19
  -1  14   9    3.57    0.26
   1  14   9    3.35    0.25
  -1 -14   9    3.50    0.20
  -2  14   9    6.69    0.35
   2 -14   9    7.22    0.29
   2  14   9    7.11    0.36
  -2 -14   9    7.16    0.29
   3 -14   9    0.55    0.10
   3  14   9    0.60    0.15
  -3 -14   9    0.56    0.11
  -4 -14   9    0.12    0.08
  -1   0  10    6.74    0.18
  -1   0 -10    6.45    0.26
   1   0  10    6.40    0.20
  -2   0  10    6.86    0.18
  -2   0 -10    6.67    0.27
  -2   0  10    6.79    0.22
   2   0  10    6.82    0.20
   3   0  10    0.61    0.05
  -3   0  10    0.73    0.05
  -3   0 -10    0.79    0.11
   3   0  10    0.78    0.07
  -3   0  10    0.69    0.08
  -4   0  10    6.27    0.22
  -4   0  10    6.40    0.19
   4   0  10    6.04    0.19
  -4   0 -10    6.52    0.26
   4   0  10    6.43    0.18
  -5   0  10   13.87    0.39
  -5   0 -10   13.32    0.43
   5   0  10   14.03    0.36
  -5   0  10   13.56    0.36
   6   0  10   -0.02    0.03
  -6   0 -10    0.02    0.06
  -6   0  10    0.08    0.05
  -6   0  10   -0.02    0.03
  -7   0  10    0.05    0.04
   7   0  10   -0.01    0.03
  -7   0  10    0.03    0.05
  -7   0 -10    0.00    0.06
  -8   0 -10    1.51    0.16
  -8   0  10    1.67    0.12
   8   0  10    1.53    0.11
  -8   0  10    1.64    0.12
  -9   0 -10    3.09    0.22
  -9   0  10    3.59    0.18
  -9   0  10    3.76    0.18
   9   0  10    3.47    0.17
 -10   0  10   -0.05    0.05
  10   0  10    0.06    0.05
 -10   0 -10    0.06    0.08
 -10   0  10    0.03    0.05
  11   0  10    0.36    0.08
 -11   0  10    0.29    0.07
 -11   0 -10    0.22    0.11
 -11   0  10    0.37    0.08
  12   0  10    0.84    0.11
 -12   0 -10    0.99    0.17
 -12   0  10    1.03    0.13
 -13   0 -10    0.22    0.11
 -13   0  10    0.26    0.09
 -14   0 -10    4.45    0.32
 -14   0  10    4.48    0.26
   0   1  10    0.00    0.01
   0   1 -10    0.04    0.06
   0   1  10    0.01    0.03
  -1   1  10    3.16    0.13
  -1  -1 -10    3.12    0.16
  -1   1  10    2.94    0.09
   1   1  10    3.09    0.12
  -1   1 -10    2.66    0.18
  -1  -1  10    3.13    0.11
  -2   1  10   11.98    0.29
  -2  -1 -10   12.15    0.36
  -2   1 -10   11.80    0.40
   2   1  10   12.29    0.31
  -2  -1  10   11.89    0.30
  -3  -1 -10    1.84    0.13
   3  -1  10    1.93    0.09
  -3   1  10    2.04    0.11
  -3   1  10    1.95    0.08
  -3  -1  10    2.10    0.09
   3   1  10    1.88    0.09
   3   1  10    2.08    0.09
  -3   1 -10    2.00    0.16
  -4  -1 -10    0.49    0.08
  -4   1  10    0.41    0.07
   4  -1  10    0.56    0.06
  -4   1  10    0.43    0.05
  -4  -1  10    0.53    0.06
   4   1  10    0.50    0.04
   4   1  10    0.51    0.06
  -4   1 -10    0.46    0.10
  -5   1  10    0.90    0.07
  -5  -1 -10    0.93    0.11
  -5   1  10    0.88    0.09
   5  -1  10    0.77    0.07
  -5  -1  10    0.85    0.08
  -5   1 -10    0.78    0.12
   5   1  10    0.90    0.08
  -6  -1 -10    0.44    0.09
   6  -1  10    0.47    0.06
  -6   1  10    0.57    0.08
  -6   1  10    0.56    0.07
  -6   1 -10    0.51    0.11
  -6  -1  10    0.37    0.06
   6   1  10    0.45    0.07
  -7  -1 -10   19.10    0.56
  -7   1  10   19.63    0.50
  -7   1  10   19.79    0.52
   7  -1  10   19.23    0.48
   7   1  10   19.15    0.50
  -7   1 -10   19.16    0.59
  -7  -1  10   19.10    0.52
  -7  -1  10   19.09    0.50
  -8   1  10   19.11    0.52
   8  -1  10   19.13    0.49
  -8  -1 -10   18.95    0.57
  -8   1  10   18.70    0.50
  -8   1 -10   19.18    0.60
  -8  -1  10   18.96    0.51
   8   1  10   18.23    0.50
  -8  -1  10   18.74    0.52
   9  -1  10   15.36    0.43
  -9  -1 -10   15.95    0.52
  -9   1  10   15.76    0.45
  -9   1  10   15.58    0.45
  -9  -1  10   15.52    0.45
  -9  -1  10   15.50    0.45
   9   1  10   15.38    0.44
  -9   1 -10   15.74    0.54
  10  -1  10    6.64    0.25
 -10   1  10    6.64    0.27
 -10   1  10    6.69    0.26
 -10  -1 -10    6.70    0.32
 -10  -1  10    6.74    0.26
 -10   1 -10    6.89    0.35
 -10  -1  10    6.71    0.27
  10   1  10    6.47    0.25
 -11   1  10    1.45    0.15
 -11   1  10    1.16    0.12
 -11  -1 -10    1.38    0.18
  11  -1  10    1.12    0.12
 -11  -1  10    1.47    0.14
 -11   1 -10    1.45    0.20
  11   1  10    1.28    0.13
 -11  -1  10    1.47    0.14
 -12  -1 -10    0.53    0.13
 -12   1  10    0.62    0.11
  12   1  10    0.38    0.09
 -12  -1  10    0.51    0.10
 -12   1 -10    0.53    0.14
 -13  -1 -10    1.28    0.19
 -13   1  10    1.26    0.15
 -13  -1  10    1.20    0.15
 -13   1 -10    1.13    0.19
 -14  -1 -10    4.45    0.30
 -14   1  10    3.93    0.24
 -14  -1  10    3.55    0.24
 -14   1 -10    3.65    0.33
   0   2 -10   28.27    0.77
   0   2  10   27.93    0.59
   0   2  10   27.54    0.65
  -1  -2 -10    6.03    0.21
  -1   2  10    6.05    0.20
  -1   2  10    6.06    0.15
  -1   2 -10    5.61    0.28
   1   2  10    6.09    0.19
  -1  -2  10    5.72    0.18
  -2  -2 -10    1.28    0.10
  -2   2  10    1.40    0.09
  -2   2  10    1.30    0.06
  -2   2 -10    1.38    0.16
  -2  -2  10    1.30    0.07
   2   2  10    1.36    0.07
  -3   2  10    5.01    0.19
  -3  -2 -10    5.10    0.20
   3  -2  10    5.52    0.16
  -3   2  10    5.12    0.15
   3   2  10    4.99    0.17
  -3   2 -10    5.19    0.26
   3   2  10    5.28    0.16
  -3  -2  10    5.17    0.17
  -4   2  10   10.61    0.27
   4  -2  10   10.82    0.28
  -4  -2 -10   10.59    0.32
  -4   2  10   10.66    0.31
  -4  -2  10   10.73    0.29
   4   2  10   10.40    0.26
   4   2  10   10.32    0.29
  -4   2 -10    9.84    0.39
  -5   2  10   19.71    0.51
  -5   2  10   20.02    0.47
  -5  -2 -10   20.00    0.53
   5  -2  10   19.90    0.47
   5   2  10   20.27    0.49
  -5   2 -10   18.47    0.59
  -5  -2  10   19.18    0.49
  -6   2  10    1.07    0.08
  -6   2  10    0.97    0.10
   6  -2  10    0.97    0.08
  -6  -2 -10    1.14    0.12
  -6  -2  10    1.02    0.08
  -6   2 -10    1.23    0.16
   6   2  10    1.15    0.10
  -7   2  10    3.21    0.15
  -7   2  10    3.16    0.16
   7  -2  10    3.32    0.14
  -7  -2 -10    3.46    0.19
  -7  -2  10    3.27    0.15
   7   2  10    3.25    0.15
  -7   2 -10    2.86    0.21
   8  -2  10    5.03    0.19
  -8   2  10    5.08    0.20
  -8  -2 -10    5.27    0.25
  -8   2  10    5.14    0.21
   8   2  10    5.31    0.21
  -8  -2  10    5.18    0.21
  -8   2 -10    5.25    0.29
  -9   2  10   15.34    0.44
   9  -2  10   14.72    0.41
  -9  -2 -10   14.96    0.49
  -9   2  10   14.91    0.44
   9   2  10   14.59    0.43
  -9  -2  10   15.38    0.45
  -9  -2  10   14.92    0.45
  -9   2 -10   15.31    0.55
  10  -2  10   13.75    0.40
 -10   2  10   14.14    0.43
 -10  -2 -10   14.36    0.49
 -10   2  10   14.22    0.42
 -10  -2  10   14.25    0.44
 -10  -2  10   14.11    0.43
  10   2  10   13.76    0.42
 -10   2 -10   14.11    0.54
  11  -2  10    1.41    0.13
 -11  -2 -10    1.27    0.17
 -11   2  10    1.32    0.14
 -11   2  10    1.29    0.13
 -11  -2  10    1.33    0.15
 -11  -2  10    1.04    0.13
 -11   2 -10    1.10    0.18
  11   2  10    1.13    0.12
 -12   2  10    1.67    0.16
 -12  -2 -10    1.17    0.17
  12   2  10    1.23    0.13
 -12   2 -10    1.07    0.18
 -12  -2  10    1.49    0.16
 -13  -2 -10    0.30    0.12
 -13   2  10    0.31    0.09
 -13  -2  10    0.27    0.09
 -13   2 -10    0.62    0.16
  13   2  10    0.40    0.10
 -14   2  10    0.01    0.08
 -14  -2 -10    0.00    0.10
 -14  -2  10    0.08    0.08
   0   3  10    0.04    0.01
   0   3  10    0.02    0.03
   0   3 -10    0.04    0.09
  -1   3  10    0.79    0.08
  -1   3  10    0.79    0.03
  -1  -3 -10    0.74    0.07
   1   3  10    0.68    0.06
  -1  -3  10    0.80    0.06
  -1   3 -10    0.91    0.15
  -2   3  10    3.62    0.15
  -2   3  10    3.83    0.10
  -2  -3 -10    3.85    0.15
  -2  -3  10    4.00    0.14
   2   3  10    3.71    0.13
  -2   3 -10    3.54    0.24
  -3  -3 -10    6.28    0.21
  -3   3  10    6.42    0.17
   3  -3  10    6.58    0.18
  -3   3  10    6.53    0.22
   3   3  10    6.67    0.21
  -3  -3  10    6.65    0.20
  -3   3 -10    6.28    0.31
   3   3  10    6.48    0.19
  -4  -3 -10   21.25    0.53
  -4   3  10   20.80    0.53
  -4   3  10   20.55    0.48
   4  -3  10   20.49    0.48
   4   3  10   20.79    0.51
   4   3  10   20.55    0.48
  -4   3 -10   20.25    0.64
  -4  -3  10   20.52    0.51
  -5  -3 -10   11.61    0.35
  -5   3  10   12.15    0.35
   5  -3  10   11.89    0.31
  -5   3  10   12.29    0.31
  -5   3 -10   12.14    0.45
   5   3  10   11.78    0.33
  -5  -3  10   11.80    0.33
   6  -3  10    7.39    0.22
  -6  -3 -10    7.68    0.27
  -6   3  10    7.60    0.24
  -6   3  10    7.70    0.26
   6   3  10    7.89    0.25
  -6  -3  10    7.95    0.26
  -6   3 -10    7.67    0.35
  -7  -3 -10    1.52    0.14
  -7   3  10    1.41    0.10
   7  -3  10    1.25    0.09
  -7   3  10    1.33    0.11
  -7  -3  10    1.26    0.10
   7   3  10    1.42    0.11
  -7   3 -10    1.29    0.17
  -8   3  10    3.21    0.16
  -8  -3 -10    3.40    0.19
   8  -3  10    3.00    0.14
  -8   3  10    3.49    0.16
   8   3  10    3.25    0.16
  -8   3 -10    3.38    0.24
  -8  -3  10    3.23    0.17
  -9   3  10    3.78    0.18
   9  -3  10    3.54    0.16
  -9   3  10    3.97    0.19
  -9  -3 -10    3.85    0.22
  -9  -3  10    4.00    0.20
   9   3  10    3.98    0.18
  -9   3 -10    3.79    0.28
 -10   3  10   17.72    0.50
 -10   3  10   17.92    0.52
 -10  -3 -10   18.66    0.57
 -10   3 -10   17.29    0.64
 -10  -3  10   18.14    0.53
  10   3  10   17.87    0.51
 -11   3  10    3.79    0.19
 -11  -3 -10    3.78    0.24
 -11   3 -10    3.73    0.29
  11   3  10    3.75    0.20
 -11  -3  10    3.87    0.21
 -12  -3 -10    0.02    0.08
 -12   3 -10    0.26    0.13
 -12  -3  10    0.07    0.07
  12   3  10    0.06    0.07
 -13  -3 -10    0.84    0.15
 -13   3 -10    0.65    0.18
 -13  -3  10    0.73    0.13
  13   3  10    0.60    0.11
 -14  -3 -10    3.58    0.28
   0   4  10    0.40    0.06
   0   4 -10    0.55    0.13
  -1   4  10  162.59    3.36
  -1   4 -10  152.81    3.54
  -1  -4  10  163.28    3.34
   1   4  10  160.32    3.35
  -2   4  10    3.93    0.16
   2   4  10    4.30    0.15
  -2  -4  10    4.28    0.16
  -2   4 -10    4.20    0.26
   3  -4  10    8.08    0.21
  -3   4  10    8.19    0.26
  -3  -4  10    8.36    0.24
   3   4  10    8.18    0.23
  -3   4 -10    7.83    0.37
   3   4  10    7.69    0.24
   4  -4  10    3.41    0.12
  -4   4  10    3.82    0.16
  -4   4 -10    3.97    0.26
   4   4  10    3.51    0.15
   4   4  10    3.84    0.14
  -4  -4  10    3.86    0.15
  -5  -4 -10   14.51    0.39
  -5   4  10   14.14    0.40
   5  -4  10   14.62    0.35
  -5   4 -10   13.41    0.51
   5   4  10   14.39    0.39
  -5  -4  10   14.57    0.39
  -6  -4 -10    2.64    0.15
  -6   4  10    2.76    0.14
   6  -4  10    2.76    0.16
  -6  -4  10    2.78    0.14
   6   4  10    2.68    0.14
  -6   4 -10    2.97    0.23
  -7  -4 -10   15.07    0.45
  -7   4  10   15.89    0.44
  -7   4 -10   15.60    0.57
  -7  -4  10   15.37    0.44
   7   4  10   15.73    0.44
  -8  -4 -10    0.06    0.06
  -8   4  10    0.16    0.06
   8   4  10    0.05    0.05
  -8  -4  10    0.07    0.05
  -8   4 -10    0.26    0.12
  -9  -4 -10    5.10    0.24
  -9   4  10    4.98    0.22
  -9   4 -10    5.66    0.34
  -9  -4  10    5.63    0.24
 -10   4  10    0.71    0.09
 -10  -4 -10    0.96    0.13
 -10  -4  10    0.69    0.11
  10   4  10    0.85    0.11
 -10   4 -10    0.83    0.18
 -11   4  10    0.17    0.07
 -11  -4 -10    0.25    0.09
 -11  -4  10    0.29    0.09
 -11   4 -10    0.11    0.13
  11   4  10    0.18    0.08
 -12  -4 -10    0.77    0.13
  12   4  10    0.86    0.12
 -12  -4  10    0.81    0.13
 -12   4 -10    0.82    0.20
 -13  -4 -10    0.06    0.09
 -13   4 -10    0.15    0.14
 -13  -4  10    0.07    0.08
  13   4  10    0.15    0.08
 -14  -4 -10    0.09    0.10
   0   5  10    0.07    0.04
  -1   5  10    0.32    0.05
  -1  -5  10    0.33    0.05
   1   5  10    0.26    0.05
  -1   5 -10    0.32    0.13
  -2   5  10    0.26    0.05
  -2  -5  10    0.17    0.04
  -2   5 -10    0.16    0.11
   2   5  10    0.25    0.05
   2   5  10    0.21    0.05
  -3   5  10    0.28    0.06
   3   5  10    0.44    0.06
   3   5  10    0.43    0.06
  -3   5 -10    0.42    0.13
  -3  -5  10    0.39    0.06
  -4   5  10    0.83    0.09
  -4  -5  10    0.70    0.08
   4   5  10    0.62    0.07
   4   5  10    0.98    0.08
  -4   5 -10    0.65    0.14
  -5   5  10    0.65    0.08
  -5   5 -10    0.42    0.12
  -5  -5  10    0.65    0.08
   5   5  10    0.72    0.08
  -6   5  10    3.05    0.15
  -6   5 -10    2.76    0.26
   6   5  10    2.65    0.14
  -6  -5  10    2.95    0.15
  -7   5  10    0.02    0.04
  -7  -5  10   -0.01    0.04
   7   5  10    0.01    0.05
  -7   5 -10    0.01    0.09
  -8   5  10    5.50    0.23
   8   5  10    5.76    0.23
  -8  -5  10    5.75    0.23
  -8   5 -10    4.99    0.34
  -9   5  10    3.81    0.19
  -9  -5  10    3.11    0.18
  -9   5 -10    3.60    0.32
   9   5  10    3.31    0.18
 -10   5  10    4.08    0.20
  10   5  10    4.32    0.22
 -10   5 -10    4.51    0.34
 -10  -5  10    4.03    0.21
 -11   5  10    2.57    0.17
 -11  -5  10    3.01    0.19
 -11   5 -10    2.67    0.29
  11   5  10    2.97    0.19
 -12   5 -10    4.86    0.38
 -12  -5  10    4.70    0.25
  12   5  10    5.17    0.26
  13   5  10    2.91    0.33
 -13   5 -10    2.42    0.46
 -13  -5  10    2.66    0.26
   0   6  10  123.84    2.67
   0  -6  10  126.83    2.66
  -1   6  10    0.96    0.09
  -1  -6  10    1.08    0.08
   1   6  10    0.95    0.09
  -1   6 -10    1.13    0.19
  -2   6  10    4.47    0.18
   2   6  10    4.50    0.17
  -2   6 -10    4.24    0.30
   2   6  10    4.12    0.17
  -2  -6  10    4.12    0.17
  -3   6  10    1.43    0.10
  -3  -6  10    1.47    0.10
   3   6  10    1.49    0.10
  -3   6 -10    1.43    0.21
   3   6  10    1.44    0.10
  -4   6  10    3.25    0.16
   4   6  10    3.27    0.15
  -4  -6  10    3.14    0.15
  -4   6 -10    2.81    0.28
   4   6  10    2.90    0.14
  -5   6  10    1.43    0.13
   5   6  10    1.59    0.11
  -5  -6  10    1.29    0.10
  -5   6 -10    1.21    0.20
  -6   6  10    8.22    0.29
  -6   6 -10    8.61    0.43
   6   6  10    8.11    0.28
  -6  -6  10    8.79    0.29
  -7   6  10    1.38    0.13
   7   6  10    1.49    0.12
  -7   6 -10    1.01    0.19
  -7  -6  10    1.27    0.12
  -8   6  10    0.25    0.07
   8   6  10    0.20    0.06
  -8   6 -10    0.31    0.13
  -8  -6  10    0.23    0.07
  -9   6  10    0.13    0.07
  -9  -6  10    0.08    0.07
  -9   6 -10    0.15    0.13
   9   6  10    0.08    0.07
 -10   6  10    0.33    0.08
 -10  -6  10    0.26    0.08
 -10   6 -10    0.26    0.15
  10   6  10    0.38    0.09
 -11   6  10    0.77    0.11
 -11   6 -10    0.80    0.19
 -11  -6  10    0.67    0.12
  11   6  10    0.62    0.12
 -12   6 -10   -0.08    0.11
  12   6  10    0.06    0.08
 -12  -6  10    0.02    0.07
   0   7  10    0.01    0.04
   0  -7  10    0.04    0.03
  -1   7  10    9.75    0.31
   1   7  10    9.46    0.30
   1   7  10    9.81    0.29
  -1  -7  10    9.83    0.30
  -2   7  10    1.00    0.10
   2   7  10    1.07    0.10
  -2   7 -10    1.02    0.19
  -2  -7  10    0.87    0.09
   2   7  10    1.30    0.11
  -3   7  10    0.71    0.09
   3   7  10    0.84    0.10
  -3   7 -10    0.86    0.18
  -3  -7  10    0.70    0.09
   3   7  10    0.76    0.08
  -4   7  10    3.23    0.17
   4   7  10    3.21    0.15
  -4   7 -10    2.69    0.29
  -4  -7  10    2.80    0.15
   4   7  10    3.15    0.15
  -5   7  10    0.27    0.07
  -5   7 -10    0.37    0.15
   5   7  10    0.23    0.06
  -5  -7  10    0.35    0.07
  -6   7  10    5.14    0.22
  -6  -7  10    5.41    0.22
   6   7  10    6.13    0.23
  -6   7 -10    5.32    0.36
  -7   7  10    0.13    0.06
  -7   7 -10    0.17    0.12
  -7  -7  10    0.08    0.06
   7   7  10    0.01    0.05
  -8   7  10    1.12    0.12
  -8  -7  10    1.14    0.12
   8   7  10    1.49    0.14
  -8   7 -10    1.17    0.23
  -9   7  10   -0.03    0.05
  -9  -7  10    0.12    0.07
   9   7  10    0.06    0.06
  -9   7 -10   -0.10    0.13
 -10   7  10   -0.03    0.05
  10   7  10   -0.06    0.06
 -10  -7  10    0.04    0.06
 -10   7 -10    0.06    0.12
 -11   7  10    3.78    0.21
 -11   7 -10    4.25    0.41
 -11  -7  10    4.11    0.24
  11   7  10    3.97    0.22
 -12   7 -10    0.99    0.27
 -12  -7  10    0.63    0.14
  12   7  10    0.47    0.12
   0  -8  10    0.74    0.09
   0   8  10    0.61    0.09
  -1   8  10    8.01    0.28
   1   8  10    7.95    0.25
  -1  -8  10    7.80    0.26
  -1   8 -10    7.48    0.43
   1   8  10    7.33    0.27
  -2   8  10    0.07    0.06
   2   8  10    0.03    0.04
   2   8  10    0.04    0.05
  -2   8 -10   -0.10    0.12
  -2  -8  10   -0.03    0.04
  -3   8  10    1.83    0.13
   3   8  10    1.75    0.12
  -3   8 -10    1.96    0.26
   3   8  10    1.80    0.13
  -3  -8  10    1.76    0.12
  -4   8  10    0.76    0.11
  -4  -8  10    0.78    0.09
   4   8  10    0.93    0.11
   4   8  10    0.83    0.09
  -4   8 -10    0.96    0.19
  -5   8  10    0.13    0.07
   5   8  10    0.10    0.05
  -5   8 -10    0.21    0.13
  -5  -8  10    0.21    0.06
  -6   8  10    0.19    0.08
   6   8  10    0.14    0.06
  -6   8 -10    0.09    0.13
  -6  -8  10    0.16    0.06
  -7   8  10    2.47    0.17
  -7   8 -10    2.19    0.29
  -7  -8  10    2.39    0.16
   7   8  10    2.27    0.15
  -8   8  10    0.18    0.07
  -8  -8  10    0.47    0.09
   8   8  10    0.34    0.09
  -8   8 -10    0.44    0.18
  -9   8  10    0.32    0.08
  -9  -8  10    0.47    0.09
  -9   8 -10    0.50    0.18
   9   8  10    0.46    0.10
 -10   8  10    0.22    0.08
 -10   8 -10    0.23    0.16
 -10  -8  10    0.14    0.08
  10   8  10    0.10    0.07
 -11   8  10    0.04    0.06
 -11  -8  10    0.05    0.07
  11   8  10    0.01    0.07
 -11   8 -10   -0.12    0.12
   0   9  10   -0.04    0.04
   0   9  10   -0.02    0.06
   0  -9  10    0.02    0.04
  -1   9  10    0.44    0.09
  -1  -9  10    0.36    0.07
   1   9  10    0.24    0.08
   1   9  10    0.40    0.07
  -2   9  10    5.97    0.25
   2   9  10    6.02    0.26
  -2   9 -10    6.63    0.43
  -2  -9  10    6.21    0.23
   2   9  10    6.59    0.23
  -3   9  10    0.12    0.06
  -3  -9  10    0.10    0.05
  -3   9 -10    0.21    0.15
   3   9  10    0.02    0.05
   3   9  10    0.08    0.06
  -4   9  10    8.59    0.32
  -4   9 -10    9.56    0.51
   4   9  10    8.73    0.32
  -4  -9  10    9.54    0.31
   4   9  10    9.31    0.30
  -5   9  10    1.83    0.16
  -5   9 -10    1.63    0.26
   5   9  10    1.60    0.12
  -5  -9  10    1.67    0.13
  -6   9  10    3.60    0.21
   6   9  10    3.73    0.19
  -6  -9  10    3.59    0.19
  -6   9 -10    3.70    0.38
  -7   9  10    3.04    0.19
  -7   9 -10    3.66    0.38
   7   9  10    3.10    0.17
  -7  -9  10    2.62    0.17
  -8   9  10    3.69    0.22
  -8  -9  10    3.86    0.22
  -8   9 -10    3.96    0.41
   8   9  10    3.81    0.20
  -9   9  10    2.12    0.19
  -9  -9  10    2.31    0.18
   9   9  10    2.21    0.17
  -9   9 -10    2.14    0.31
 -10   9  10    7.20    0.31
 -10  -9  10    7.14    0.32
  10   9  10    7.09    0.31
 -10   9 -10    7.83    0.52
 -11   9  10    2.66    0.19
   0  10  10    0.61    0.11
   0 -10  10    0.43    0.08
   0  10  10    0.43    0.07
   1 -10  10    0.08    0.05
  -1  10  10    0.23    0.08
   1  10  10    0.15    0.05
   1  10  10    0.15    0.07
  -1 -10  10    0.17    0.06
  -2  10  10    2.23    0.19
   2  10  10    2.06    0.12
  -2  10 -10    2.09    0.30
   2  10  10    1.89    0.15
  -2 -10  10    1.80    0.13
  -3  10  10    4.01    0.22
  -3 -10  10    4.18    0.20
  -3  10 -10    4.40    0.42
   3  10  10    4.22    0.22
   3  10  10    4.21    0.18
  -4  10  10    1.51    0.16
   4  10  10    1.60    0.16
   4  10  10    1.74    0.12
  -4  10 -10    2.04    0.31
  -4 -10  10    1.56    0.14
  -5  10  10    3.81    0.21
   5  10  10    3.87    0.19
  -5 -10  10    3.74    0.19
  -5  10 -10    3.79    0.40
  -6  10  10    0.40    0.10
  -6 -10  10    0.63    0.10
  -6  10 -10    0.63    0.21
   6  10  10    0.58    0.09
  -7  10  10    0.79    0.12
  -7  10 -10    0.70    0.20
  -7 -10  10    0.90    0.12
   7  10  10    0.60    0.10
  -8  10  10    0.19    0.08
  -8  10 -10    0.34    0.18
  -8 -10  10    0.11    0.07
   8  10  10    0.14    0.08
  -9  10  10    2.52    0.20
  -9 -10  10    3.00    0.21
   9  10  10    2.85    0.19
  -9  10 -10    2.80    0.37
 -10  10  10    1.39    0.16
  10  10  10    1.21    0.15
   0 -11  10    0.01    0.05
   0  11  10    0.08    0.07
  -1  11  10    1.83    0.17
   1 -11  10    1.83    0.13
  -1 -11  10    2.12    0.14
   1  11  10    1.59    0.17
  -2  11  10    0.00    0.08
   2  11  10    0.04    0.07
  -2 -11  10   -0.01    0.04
  -3  11  10    2.41    0.19
  -3  11 -10    2.41    0.32
  -3 -11  10    2.81    0.17
   3  11  10    2.72    0.15
   3  11  10    2.68    0.19
  -4  11  10   -0.04    0.08
  -4 -11  10   -0.03    0.05
   4  11  10   -0.05    0.07
  -4  11 -10    0.00    0.16
   4  11  10    0.01    0.05
  -5  11  10    0.15    0.08
  -5  11 -10    0.13    0.18
   5  11  10    0.30    0.08
  -5 -11  10    0.21    0.07
  -6  11  10    1.56    0.17
  -6  11 -10    1.34    0.27
   6  11  10    1.31    0.13
  -6 -11  10    1.24    0.14
  -7  11  10    5.00    0.28
  -7  11 -10    5.14    0.49
  -7 -11  10    4.70    0.24
   7  11  10    5.05    0.24
  -8  11  10    0.32    0.11
  -8  11 -10    0.11    0.18
  -8 -11  10    0.16    0.08
   8  11  10    0.25    0.08
  -9  11  10   13.03    0.48
   9  11  10   12.01    0.43
   0 -12  10    0.41    0.08
   0  12  10    0.48    0.12
   1 -12  10    4.29    0.21
  -1  12  10    4.37    0.25
  -1 -12  10    4.14    0.21
   1  12  10    4.13    0.24
  -2  12  10    0.06    0.08
   2 -12  10    0.16    0.06
  -2 -12  10    0.15    0.07
   2  12  10    0.04    0.08
  -3  12  10   -0.11    0.07
   3  12  10    0.04    0.07
  -3 -12  10   -0.01    0.05
  -4  12  10    3.09    0.22
   4  12  10    2.27    0.24
  -4 -12  10    2.76    0.18
  -4  12 -10    2.89    0.37
  -5  12  10    0.12    0.10
  -5  12 -10    0.01    0.18
  -5 -12  10    0.07    0.07
  -6  12  10    7.98    0.37
  -6 -12  10    8.30    0.33
  -6  12 -10    8.38    0.57
  -7  12  10    0.00    0.08
  -7 -12  10    0.17    0.08
  -7  12 -10    0.25    0.18
   7  12  10    0.02    0.10
   8  12  10   -0.02    0.07
   0  13  10    0.06    0.08
   0 -13  10    0.01    0.05
   1 -13  10    1.09    0.13
  -1  13  10    1.00    0.16
  -1 -13  10    0.91    0.12
   1  13  10    0.94    0.15
  -2  13  10    0.70    0.14
   2 -13  10    0.65    0.10
   2  13  10    0.60    0.13
  -2 -13  10    0.50    0.10
   3 -13  10    1.50    0.14
  -3  13  10    1.54    0.19
   3  13  10    1.20    0.17
  -3 -13  10    1.32    0.14
  -4  13  10    0.21    0.11
  -4  13 -10    0.17    0.19
  -4 -13  10    0.23    0.08
  -5  13  10    1.04    0.18
  -5 -13  10    0.97    0.13
  -5  13 -10    1.22    0.29
   0 -14  10    0.03    0.06
   0  14  10    0.11    0.10
   1 -14  10    2.82    0.18
  -1  14  10    2.35    0.24
   1  14  10    2.28    0.23
  -1 -14  10    2.66    0.18
   2 -14  10    0.14    0.07
  -2 -14  10    0.07    0.06
   2  14  10   -0.09    0.08
   3 -14  10    0.98    0.12
   3  14  10    0.92    0.16
  -3 -14  10    0.80    0.13
  -1   0  11    0.10    0.02
  -1   0 -11    0.03    0.06
  -1   0  11   -0.01    0.03
   1   0  11   -0.04    0.02
  -2   0  11    0.01    0.03
  -2   0 -11    0.04    0.06
  -2   0  11    0.01    0.02
   2   0  11   -0.02    0.02
  -3   0 -11    0.03    0.06
   3   0  11   -0.05    0.02
   3   0  11    0.00    0.02
  -3   0  11   -0.04    0.03
  -3   0  11    0.01    0.02
  -4   0 -11   -0.05    0.05
   4   0  11    0.00    0.02
  -4   0  11   -0.02    0.02
   4   0  11    0.00    0.03
  -4   0  11    0.02    0.04
  -5   0  11    0.01    0.04
   5   0  11    0.02    0.03
  -5   0 -11    0.10    0.07
  -5   0  11    0.06    0.03
   6   0  11   -0.02    0.03
  -6   0 -11    0.08    0.07
  -6   0  11    0.00    0.03
  -6   0  11    0.02    0.04
  -7   0  11   -0.06    0.03
  -7   0  11    0.00    0.03
  -7   0 -11    0.01    0.06
   7   0  11   -0.01    0.03
  -8   0 -11   -0.01    0.07
  -8   0  11   -0.02    0.05
  -8   0  11    0.00    0.04
   8   0  11    0.00    0.04
  -9   0 -11    0.09    0.09
  -9   0  11    0.06    0.05
  -9   0  11    0.02    0.05
   9   0  11   -0.01    0.05
  10   0  11   -0.02    0.05
 -10   0 -11    0.11    0.10
 -10   0  11   -0.07    0.05
 -10   0  11    0.07    0.06
 -11   0 -11   -0.15    0.08
 -11   0  11   -0.02    0.06
 -11   0  11   -0.08    0.04
  11   0  11    0.00    0.05
  12   0  11    0.10    0.07
 -12   0  11    0.05    0.07
 -12   0 -11   -0.08    0.09
 -13   0 -11    0.00    0.10
 -13   0  11   -0.03    0.07
 -14   0 -11   -0.05    0.12
 -14   0  11    0.02    0.08
   0   1  11   -0.01    0.01
   0   1  11    0.00    0.03
  -1   1  11    2.15    0.08
  -1  -1 -11    2.11    0.14
  -1   1  11    2.13    0.11
  -1  -1  11    2.20    0.09
  -1   1 -11    2.17    0.17
   1   1  11    2.06    0.10
  -2   1  11   20.45    0.52
  -2   1  11   20.36    0.46
  -2  -1 -11   20.57    0.56
   2   1  11   20.51    0.49
  -2   1 -11   20.11    0.60
  -2  -1  11   20.39    0.48
  -3   1  11    3.99    0.13
  -3   1  11    3.76    0.16
  -3  -1 -11    4.34    0.20
   3  -1  11    4.02    0.14
   3   1  11    4.07    0.15
  -3   1 -11    4.28    0.23
   3   1  11    4.15    0.14
  -3  -1  11    3.88    0.14
   4  -1  11    7.27    0.22
  -4   1  11    7.33    0.21
  -4  -1 -11    6.90    0.27
  -4   1  11    7.30    0.25
   4   1  11    7.17    0.22
   4   1  11    7.31    0.20
  -4  -1  11    7.20    0.22
  -4   1 -11    7.29    0.31
  -5   1  11    7.20    0.22
   5  -1  11    6.99    0.22
  -5   1  11    7.08    0.25
  -5  -1 -11    7.46    0.29
   5   1  11    7.14    0.23
  -5   1 -11    6.82    0.31
  -5  -1  11    7.41    0.23
   6  -1  11   10.63    0.30
  -6   1  11   10.80    0.30
  -6  -1 -11   10.63    0.37
  -6   1  11   10.97    0.34
  -6  -1  11   10.71    0.31
  -6   1 -11    9.97    0.39
   6   1  11   10.55    0.31
  -6  -1  11   10.96    0.34
   7  -1  11    0.02    0.04
  -7   1  11   -0.01    0.04
  -7   1  11    0.02    0.05
  -7  -1 -11   -0.02    0.06
  -7  -1  11    0.05    0.05
  -7  -1  11    0.03    0.04
  -7   1 -11    0.05    0.07
   7   1  11    0.05    0.05
  -8   1  11    0.15    0.05
   8  -1  11    0.07    0.05
  -8  -1 -11    0.23    0.09
  -8   1  11    0.13    0.05
  -8  -1  11    0.17    0.06
  -8  -1  11    0.12    0.05
  -8   1 -11    0.26    0.11
   8   1  11    0.13    0.06
  -9   1  11    1.40    0.13
   9  -1  11    1.24    0.11
  -9  -1 -11    1.53    0.17
  -9   1  11    1.49    0.13
   9   1  11    1.55    0.13
  -9   1 -11    1.31    0.17
  -9  -1  11    1.36    0.12
  -9  -1  11    1.44    0.14
 -10   1  11   10.37    0.35
 -10   1  11   10.63    0.36
  10  -1  11   10.35    0.33
 -10  -1 -11   10.61    0.42
 -10  -1  11   10.82    0.36
  10   1  11   10.11    0.34
 -10  -1  11   10.55    0.36
 -10   1 -11   10.28    0.44
 -11   1  11    8.11    0.30
  11  -1  11    7.69    0.29
 -11  -1 -11    8.33    0.38
 -11   1  11    8.24    0.31
  11   1  11    7.91    0.30
 -11  -1  11    7.71    0.31
 -11  -1  11    8.50    0.31
 -11   1 -11    8.22    0.41
 -12   1  11   -0.11    0.05
 -12  -1 -11    0.00    0.08
  12  -1  11   -0.04    0.05
 -12   1 -11    0.13    0.11
  12   1  11    0.13    0.07
 -12  -1  11    0.02    0.06
 -13  -1 -11   -0.01    0.10
 -13   1  11    0.06    0.07
 -13  -1  11    0.09    0.08
  13   1  11    0.15    0.08
 -13   1 -11    0.07    0.12
 -14  -1 -11    2.40    0.27
 -14   1  11    3.00    0.22
 -14  -1  11    2.84    0.21
   0   2  11   46.46    1.03
   0   2  11   46.15    0.97
  -1   2  11   16.36    0.37
  -1   2  11   16.77    0.43
  -1  -2 -11   16.23    0.44
   1   2  11   16.68    0.42
  -1  -2  11   16.91    0.40
  -1   2 -11   16.68    0.55
  -2   2  11   12.26    0.34
  -2   2  11   12.05    0.29
  -2  -2 -11   12.04    0.36
  -2   2 -11   12.50    0.45
   2   2  11   12.34    0.32
  -2  -2  11   12.24    0.32
   3  -2  11    4.19    0.14
  -3  -2 -11    3.94    0.18
  -3   2  11    4.21    0.13
  -3   2  11    3.75    0.16
  -3  -2  11    4.07    0.14
  -3   2 -11    3.78    0.23
   3   2  11    4.09    0.14
   3   2  11    4.09    0.15
  -4  -2 -11    5.93    0.23
  -4   2  11    5.70    0.21
  -4   2  11    5.85    0.17
   4  -2  11    5.79    0.18
   4   2  11    5.64    0.17
  -4   2 -11    6.36    0.30
  -4  -2  11    5.83    0.19
   4   2  11    5.90    0.20
  -5   2  11    0.69    0.07
  -5  -2 -11    0.75    0.10
  -5   2  11    0.61    0.08
   5  -2  11    0.65    0.06
  -5  -2  11    0.76    0.08
   5   2  11    0.62    0.07
  -5   2 -11    0.44    0.11
  -6  -2 -11    0.54    0.10
  -6   2  11    0.57    0.07
   6  -2  11    0.58    0.06
  -6   2  11    0.43    0.07
  -6   2 -11    0.41    0.12
  -6  -2  11    0.62    0.07
   6   2  11    0.40    0.06
  -7   2  11    0.25    0.06
  -7   2  11    0.35    0.06
   7  -2  11    0.31    0.06
  -7  -2 -11    0.54    0.10
  -7   2 -11    0.22    0.11
   7   2  11    0.30    0.06
  -7  -2  11    0.29    0.06
  -8  -2 -11    2.08    0.16
   8  -2  11    2.41    0.13
  -8   2  11    2.09    0.13
  -8   2  11    2.29    0.14
  -8   2 -11    2.21    0.23
   8   2  11    2.23    0.13
  -8  -2  11    2.08    0.14
   9  -2  11   18.38    0.49
  -9   2  11   18.25    0.51
  -9  -2 -11   19.37    0.58
  -9   2  11   19.33    0.53
  -9  -2  11   18.36    0.53
  -9  -2  11   18.96    0.53
   9   2  11   18.62    0.51
  -9   2 -11   17.73    0.63
 -10   2  11    0.11    0.06
  10  -2  11    0.12    0.06
 -10   2  11    0.24    0.08
 -10  -2 -11    0.15    0.09
  10   2  11    0.13    0.07
 -10  -2  11    0.11    0.07
 -10  -2  11    0.09    0.06
 -10   2 -11    0.36    0.12
 -11  -2 -11    1.32    0.17
 -11   2  11    1.23    0.13
 -11   2  11    1.38    0.15
  11  -2  11    1.32    0.13
 -11  -2  11    1.54    0.16
  11   2  11    1.05    0.12
 -11   2 -11    1.56    0.22
 -11  -2  11    1.15    0.13
 -12  -2 -11    0.42    0.12
 -12   2  11    0.71    0.18
 -12  -2  11    0.54    0.11
  12   2  11    0.56    0.10
 -12   2 -11    0.60    0.16
 -13  -2 -11    0.50    0.14
 -13   2 -11    0.33    0.15
 -13  -2  11    0.39    0.11
  13   2  11    0.42    0.10
 -14  -2 -11    1.70    0.22
   0   3  11    0.02    0.03
  -1   3  11   12.53    0.35
   1   3  11   12.76    0.33
  -1  -3  11   12.25    0.32
  -1   3 -11   12.11    0.47
  -2   3  11    8.53    0.26
  -2   3 -11    8.03    0.37
  -2  -3  11    8.28    0.24
   2   3  11    8.57    0.24
   3  -3  11    5.17    0.16
  -3  -3 -11    5.24    0.20
  -3   3  11    5.22    0.19
   3   3  11    4.98    0.16
  -3  -3  11    4.78    0.17
  -3   3 -11    4.57    0.28
   3   3  11    4.97    0.18
   4  -3  11    0.23    0.04
  -4  -3 -11    0.28    0.07
  -4   3  11    0.22    0.05
   4   3  11    0.19    0.04
  -4   3 -11    0.14    0.09
   4   3  11    0.14    0.04
  -4  -3  11    0.24    0.05
  -5  -3 -11    1.73    0.13
  -5   3  11    1.67    0.11
   5  -3  11    1.70    0.09
  -5   3 -11    1.58    0.18
  -5  -3  11    1.91    0.11
   5   3  11    1.70    0.11
  -6  -3 -11    1.25    0.12
   6  -3  11    1.03    0.08
  -6   3  11    1.22    0.11
  -6  -3  11    1.18    0.09
   6   3  11    0.89    0.09
  -6   3 -11    1.09    0.17
   7  -3  11    0.12    0.04
  -7   3  11    0.13    0.05
  -7  -3 -11    0.10    0.07
  -7   3 -11    0.21    0.11
  -7  -3  11    0.17    0.06
   7   3  11    0.04    0.05
  -8   3  11    2.39    0.15
  -8  -3 -11    2.20    0.16
   8  -3  11    2.02    0.12
   8   3  11    2.23    0.14
  -8  -3  11    2.06    0.14
  -8   3 -11    1.88    0.22
  -9  -3 -11    0.50    0.10
  -9   3  11    0.62    0.10
  -9   3 -11    0.48    0.15
   9   3  11    0.51    0.09
  -9  -3  11    0.50    0.08
 -10  -3 -11    0.00    0.07
 -10   3  11    0.08    0.06
  10   3  11    0.09    0.06
 -10  -3  11    0.01    0.06
 -10   3 -11    0.01    0.10
 -10  -3  11    0.06    0.06
 -11   3  11    0.76    0.10
 -11  -3 -11    1.11    0.16
 -11   3 -11    0.98    0.19
  11   3  11    0.74    0.12
 -11  -3  11    0.81    0.12
 -11  -3  11    0.77    0.11
 -12  -3 -11   -0.07    0.08
  12   3  11   -0.03    0.06
 -12   3 -11   -0.09    0.11
 -12  -3  11   -0.02    0.06
 -13  -3 -11    0.80    0.16
 -13  -3  11    0.83    0.13
 -13   3 -11    0.51    0.17
  13   3  11    0.79    0.13
 -14  -3 -11    2.84    0.27
   0   4  11   63.00    1.38
  -1   4  11   11.65    0.33
  -1  -4  11   11.65    0.31
  -1   4 -11   10.96    0.46
   1   4  11   11.41    0.32
  -2   4  11    4.26    0.17
  -2  -4  11    4.41    0.16
   2   4  11    4.51    0.16
  -2   4 -11    4.10    0.27
  -3   4  11   -0.02    0.03
   3  -4  11   -0.01    0.02
   3   4  11    0.03    0.04
  -3   4 -11    0.01    0.09
   3   4  11    0.02    0.03
  -3  -4  11   -0.02    0.03
  -4   4  11    5.32    0.21
   4  -4  11    5.38    0.16
  -4  -4  11    5.44    0.19
   4   4  11    5.30    0.20
  -4   4 -11    4.86    0.30
   4   4  11    5.51    0.17
   5  -4  11    8.40    0.26
  -5   4  11    8.14    0.28
  -5  -4  11    9.02    0.27
  -5   4 -11    8.66    0.40
   5   4  11    8.15    0.26
  -6   4  11    8.25    0.28
  -6  -4  11    8.34    0.28
   6   4  11    8.55    0.28
  -6   4 -11    9.19    0.42
  -7   4  11    0.28    0.07
  -7   4 -11    0.33    0.12
  -7  -4  11    0.35    0.07
   7   4  11    0.26    0.06
  -8   4  11    1.26    0.12
   8   4  11    1.00    0.11
  -8  -4  11    1.05    0.11
  -8   4 -11    0.96    0.17
  -9   4  11    1.02    0.11
  -9   4 -11    1.12    0.19
  -9  -4  11    0.98    0.12
   9   4  11    1.24    0.12
 -10   4  11    1.36    0.13
  10   4  11    1.22    0.13
 -10  -4  11    1.17    0.13
 -10   4 -11    1.07    0.19
 -11   4  11    1.62    0.15
  11   4  11    1.71    0.16
 -11  -4  11    1.27    0.14
 -11   4 -11    1.44    0.23
 -12   4 -11    1.29    0.23
  12   4  11    1.01    0.13
 -12  -4  11    1.30    0.15
 -13  -4  11    0.17    0.09
  13   4  11    0.16    0.09
 -13   4 -11    0.19    0.15
   0  -5  11    0.05    0.03
   0   5  11    0.00    0.03
  -1   5  11   10.25    0.31
   1   5  11   10.76    0.31
  -1   5 -11   11.07    0.47
  -1  -5  11   10.71    0.30
  -2   5  11    0.62    0.08
   2   5  11    0.50    0.06
   2   5  11    0.62    0.07
  -2  -5  11    0.55    0.07
  -2   5 -11    0.75    0.15
  -3   5  11    0.91    0.09
  -3   5 -11    0.75    0.17
  -3  -5  11    0.84    0.08
   3   5  11    0.68    0.07
   3   5  11    0.86    0.08
  -4   5  11    0.48    0.07
  -4   5 -11    0.44    0.13
   4   5  11    0.42    0.06
   4   5  11    0.53    0.06
  -4  -5  11    0.55    0.07
  -5   5  11    9.19    0.30
   5   5  11    8.96    0.29
  -5  -5  11    9.28    0.29
  -5   5 -11    8.77    0.42
  -6   5  11    6.02    0.23
  -6   5 -11    5.64    0.35
  -6  -5  11    6.41    0.24
   6   5  11    6.09    0.23
  -7   5  11    3.14    0.17
   7   5  11    3.62    0.18
  -7  -5  11    3.42    0.17
  -7   5 -11    3.42    0.28
  -8   5  11    0.20    0.06
   8   5  11    0.15    0.06
  -8  -5  11    0.19    0.07
  -8   5 -11    0.37    0.13
  -9   5  11    0.81    0.11
  -9   5 -11    0.97    0.20
  -9  -5  11    1.38    0.14
   9   5  11    1.28    0.13
 -10   5  11    0.65    0.10
  10   5  11    0.56    0.10
 -10   5 -11    0.83    0.19
 -10  -5  11    0.69    0.11
 -11   5  11    3.02    0.18
 -11  -5  11    3.14    0.20
 -11   5 -11    2.97    0.32
  11   5  11    2.88    0.19
 -12   5 -11    3.55    0.37
  12   5  11    3.38    0.22
 -12  -5  11    2.81    0.21
   0  -6  11   12.71    0.35
   0   6  11   12.06    0.35
  -1   6  11    5.64    0.21
  -1  -6  11    5.90    0.21
  -1   6 -11    6.13    0.37
   1   6  11    5.65    0.21
  -2   6  11    9.94    0.32
   2   6  11   10.47    0.30
   2   6  11   10.32    0.31
  -2   6 -11    9.78    0.48
  -2  -6  11   10.56    0.31
  -3   6  11    0.71    0.09
   3   6  11    0.76    0.09
   3   6  11    0.69    0.08
  -3  -6  11    0.71    0.08
  -3   6 -11    0.77    0.17
  -4   6  11    5.18    0.21
   4   6  11    5.08    0.20
  -4   6 -11    5.71    0.35
   4   6  11    5.56    0.20
  -4  -6  11    5.33    0.20
  -5   6  11    5.25    0.22
  -5   6 -11    5.20    0.36
  -5  -6  11    5.20    0.21
   5   6  11    5.74    0.21
  -6   6  11    3.56    0.18
   6   6  11    3.43    0.17
  -6   6 -11    4.03    0.30
  -6  -6  11    3.66    0.18
  -7   6  11    0.07    0.05
  -7   6 -11    0.09    0.12
  -7  -6  11   -0.02    0.04
   7   6  11   -0.01    0.05
  -8   6  11    0.46    0.09
  -8   6 -11    0.31    0.14
   8   6  11    0.50    0.08
  -8  -6  11    0.55    0.09
  -9   6  11    0.20    0.07
  -9   6 -11    0.17    0.14
   9   6  11    0.25    0.08
  -9  -6  11    0.15    0.06
 -10   6  11    2.01    0.16
  10   6  11    2.21    0.17
 -10   6 -11    1.97    0.27
 -10  -6  11    2.38    0.17
 -11   6  11    1.45    0.15
  11   6  11    1.57    0.16
 -11   6 -11    1.94    0.29
 -11  -6  11    1.49    0.16
 -12   6 -11    2.43    0.33
 -12  -6  11    2.18    0.20
  12   6  11    2.57    0.22
   0  -7  11   -0.04    0.04
   0   7  11    0.04    0.05
  -1   7  11    0.76    0.09
   1   7  11    0.67    0.08
  -1  -7  11    0.66    0.08
  -1   7 -11    0.53    0.15
  -2   7  11    6.28    0.23
   2   7  11    6.04    0.22
  -2   7 -11    6.56    0.39
   2   7  11    5.92    0.22
  -2  -7  11    6.01    0.22
  -3   7  11    1.15    0.12
   3   7  11    1.20    0.11
   3   7  11    1.34    0.11
  -3  -7  11    1.05    0.10
  -3   7 -11    0.94    0.19
  -4   7  11    7.06    0.26
  -4  -7  11    7.05    0.25
   4   7  11    7.30    0.25
  -4   7 -11    6.95    0.41
   4   7  11    7.19    0.25
  -5   7  11    1.48    0.14
  -5   7 -11    1.45    0.24
  -5  -7  11    1.68    0.12
   5   7  11    1.52    0.13
  -6   7  11    0.20    0.07
  -6   7 -11    0.12    0.13
   6   7  11    0.23    0.07
  -6  -7  11    0.23    0.06
  -7   7  11    0.64    0.10
  -7   7 -11    0.75    0.18
   7   7  11    0.57    0.09
  -7  -7  11    0.68    0.10
  -8   7  11    1.06    0.12
  -8   7 -11    0.90    0.20
  -8  -7  11    1.23    0.13
   8   7  11    1.03    0.12
  -9   7  11    0.09    0.07
  -9  -7  11    0.05    0.06
   9   7  11   -0.04    0.06
  -9   7 -11    0.01    0.12
 -10   7  11    2.29    0.17
 -10  -7  11    2.38    0.18
  10   7  11    2.38    0.18
 -10   7 -11    2.29    0.31
 -11   7  11    1.37    0.15
 -11   7 -11    1.39    0.27
  11   7  11    1.37    0.15
 -11  -7  11    1.41    0.16
   0  -8  11   39.78    0.93
   0   8  11   39.29    0.95
  -1   8  11    0.00    0.05
  -1  -8  11   -0.04    0.04
   1   8  11   -0.05    0.05
   1   8  11   -0.01    0.04
  -2   8  11    0.20    0.07
  -2   8 -11    0.14    0.15
   2   8  11    0.29    0.06
   2   8  11    0.24    0.07
  -2  -8  11    0.22    0.06
  -3   8  11    0.24    0.08
   3   8  11    0.16    0.05
  -3  -8  11    0.24    0.06
   3   8  11    0.26    0.07
  -3   8 -11    0.05    0.12
  -4   8  11    1.83    0.15
  -4  -8  11    1.90    0.13
   4   8  11    2.20    0.13
  -4   8 -11    2.15    0.29
   4   8  11    2.24    0.14
  -5   8  11    1.35    0.13
   5   8  11    1.21    0.11
  -5   8 -11    1.01    0.22
  -5  -8  11    1.32    0.13
  -6   8  11   -0.01    0.05
   6   8  11    0.08    0.06
  -6  -8  11    0.00    0.04
  -6   8 -11    0.21    0.16
  -7   8  11    0.07    0.06
  -7  -8  11   -0.01    0.05
  -7   8 -11    0.05    0.13
   7   8  11   -0.02    0.05
  -8   8  11    2.99    0.19
  -8   8 -11    3.31    0.37
  -8  -8  11    3.42    0.19
   8   8  11    3.06    0.19
  -9   8  11    2.61    0.19
  -9   8 -11    2.55    0.34
  -9  -8  11    2.42    0.17
   9   8  11    2.22    0.17
 -10   8  11    1.65    0.16
 -10  -8  11    1.54    0.16
  10   8  11    1.67    0.16
 -10   8 -11    1.74    0.28
 -11   8  11    7.15    0.31
  11   8  11    7.66    0.32
 -11   8 -11    6.08    0.58
 -11  -8  11    7.20    0.37
   0  -9  11    0.03    0.05
   0   9  11   -0.04    0.03
   0   9  11   -0.05    0.05
  -1   9  11   -0.07    0.05
   1  -9  11    0.01    0.05
   1   9  11   -0.04    0.04
  -1  -9  11    0.04    0.04
   1   9  11    0.06    0.06
  -2   9  11    4.64    0.22
   2   9  11    4.86    0.20
  -2  -9  11    4.63    0.20
  -2   9 -11    4.60    0.37
   2   9  11    5.03    0.23
  -3   9  11    3.77    0.20
  -3   9 -11    3.60    0.37
   3   9  11    3.86    0.18
  -3  -9  11    3.63    0.18
   3   9  11    3.69    0.19
  -4   9  11    0.41    0.09
   4   9  11    0.59    0.09
  -4   9 -11    0.37    0.16
   4   9  11    0.44    0.09
  -4  -9  11    0.41    0.08
  -5   9  11    3.77    0.21
  -5  -9  11    3.42    0.18
   5   9  11    4.02    0.19
  -5   9 -11    4.21    0.40
  -6   9  11    1.02    0.13
  -6  -9  11    0.91    0.11
   6   9  11    0.88    0.11
  -6   9 -11    1.00    0.23
  -7   9  11    1.55    0.16
   7   9  11    1.86    0.16
  -7   9 -11    1.98    0.29
  -7  -9  11    1.73    0.16
  -8   9  11    0.22    0.08
  -8   9 -11    0.41    0.18
  -8  -9  11    0.31    0.09
   8   9  11    0.25    0.08
  -9   9  11    0.05    0.07
  -9  -9  11    0.06    0.07
   9   9  11    0.06    0.07
  -9   9 -11    0.23    0.17
 -10   9  11    0.31    0.10
 -10   9 -11    0.31    0.20
 -10  -9  11    0.53    0.12
  10   9  11    0.63    0.12
 -11   9  11    0.60    0.12
   0 -10  11    0.27    0.07
   0  10  11    0.23    0.09
   0  10  11    0.26    0.06
  -1  10  11    0.08    0.07
   1 -10  11    0.08    0.06
   1  10  11    0.15    0.05
  -1 -10  11    0.15    0.06
   1  10  11    0.06    0.07
  -2  10  11    0.56    0.11
  -2  10 -11    0.34    0.18
   2  10  11    0.81    0.12
  -2 -10  11    0.64    0.10
   2  10  11    0.54    0.08
  -3  10  11    0.19    0.08
   3  10  11    0.08    0.05
   3  10  11    0.18    0.08
  -3 -10  11    0.10    0.06
  -3  10 -11   -0.03    0.15
  -4  10  11    1.87    0.17
   4  10  11    1.92    0.13
  -4 -10  11    1.78    0.13
   4  10  11    1.74    0.25
  -4  10 -11    2.19    0.32
  -5  10  11    0.19    0.08
  -5 -10  11    0.33    0.08
   5  10  11    0.26    0.07
  -5  10 -11    0.54    0.20
  -6  10  11    0.62    0.11
  -6 -10  11    0.35    0.09
  -6  10 -11    0.34    0.18
   6  10  11    0.39    0.08
  -7  10  11    0.44    0.10
  -7 -10  11    0.37    0.09
   7  10  11    0.37    0.08
  -7  10 -11    0.13    0.19
  -8  10  11    3.38    0.22
   8  10  11    3.39    0.20
  -8  10 -11    3.14    0.39
  -8 -10  11    3.57    0.21
  -9  10  11    4.93    0.27
  -9 -10  11    5.35    0.27
  -9  10 -11    5.39    0.50
   9  10  11    5.56    0.26
 -10  10  11   -0.07    0.08
   0 -11  11    0.01    0.05
   0  11  11    0.06    0.07
  -1  11  11    0.18    0.09
   1 -11  11    0.36    0.08
   1  11  11    0.14    0.08
  -1 -11  11    0.28    0.08
   2 -11  11    1.53    0.14
  -2  11  11    2.07    0.19
   2  11  11    1.47    0.13
  -2 -11  11    1.33    0.13
   2  11  11    1.82    0.18
  -3  11  11    0.67    0.12
   3  11  11    0.48    0.11
  -3  11 -11    0.47    0.21
  -3 -11  11    0.63    0.09
   3  11  11    0.69    0.10
  -4  11  11    0.44    0.11
   4  11  11    0.34    0.08
  -4 -11  11    0.33    0.08
  -4  11 -11    0.23    0.17
  -5  11  11    0.84    0.14
  -5  11 -11    0.60    0.22
   5  11  11    1.03    0.12
  -5 -11  11    1.04    0.13
  -6  11  11    0.60    0.12
  -6  11 -11    0.60    0.22
  -6 -11  11    1.05    0.14
   6  11  11    0.65    0.10
  -7  11  11    0.71    0.13
  -7  11 -11    0.59    0.23
  -7 -11  11    0.45    0.10
   7  11  11    0.59    0.11
  -8  11  11    3.98    0.25
  -8 -11  11    3.92    0.24
  -8  11 -11    4.07    0.44
   8  11  11    4.18    0.23
   9  11  11    0.11    0.09
   0 -12  11    3.09    0.18
   0  12  11    2.75    0.21
  -1  12  11    1.84    0.19
   1 -12  11    1.94    0.14
  -1 -12  11    1.99    0.15
   1  12  11    1.83    0.18
   2 -12  11    0.13    0.06
  -2  12  11    0.21    0.09
  -2 -12  11    0.09    0.07
   2  12  11    0.15    0.10
  -3  12  11    0.19    0.11
  -3 -12  11    0.06    0.06
   3  12  11    0.17    0.09
  -4  12  11    3.52    0.24
  -4 -12  11    3.71    0.20
  -4  12 -11    4.60    0.48
  -5  12  11    0.46    0.12
  -5 -12  11    0.59    0.11
  -5  12 -11    0.19    0.17
  -6  12  11    0.15    0.10
  -6 -12  11    0.23    0.09
  -6  12 -11    0.22    0.19
   7  12  11    1.17    0.14
   8  12  11    3.99    0.23
   0  13  11   -0.04    0.08
   0 -13  11    0.07    0.06
   1 -13  11    0.23    0.08
  -1  13  11    0.09    0.10
  -1 -13  11    0.23    0.08
   1  13  11    0.12    0.09
  -2  13  11    0.46    0.13
   2 -13  11    0.55    0.10
   2  13  11    0.55    0.13
  -2 -13  11    0.71    0.11
  -3  13  11    0.88    0.15
   3 -13  11    0.76    0.12
  -3 -13  11    0.77    0.11
   3  13  11    0.84    0.15
  -4  13  11    2.28    0.22
  -4  13 -11    1.96    0.33
  -4 -13  11    2.07    0.16
   0  14  11    0.28    0.13
   0 -14  11    0.39    0.14
   1 -14  11    5.12    0.35
   1  14  11    4.47    0.30
   2  14  11   -0.05    0.08
   3  14  11   -0.09    0.09
   0   0  12   10.42    0.29
   0   0  12    9.17    0.24
  -1   0 -12    5.01    0.24
   1   0  12    5.38    0.18
  -1   0  12    5.12    0.19
  -1   0  12    5.23    0.15
  -2   0 -12   -0.01    0.06
   2   0  12   -0.01    0.03
  -2   0  12    0.02    0.03
  -2   0  12    0.01    0.02
  -3   0  12   17.58    0.47
   3   0  12   17.37    0.43
  -3   0  12   17.65    0.42
   3   0  12   17.27    0.43
  -3   0 -12   17.06    0.53
  -4   0  12    5.36    0.21
   4   0  12    5.75    0.19
  -4   0  12    5.29    0.18
  -4   0 -12    5.53    0.26
   4   0  12    5.67    0.17
  -5   0  12    7.18    0.26
   5   0  12    7.82    0.24
  -5   0  12    7.43    0.23
  -5   0 -12    7.65    0.32
  -6   0 -12    7.72    0.33
   6   0  12    8.27    0.26
  -6   0  12    8.22    0.29
  -6   0  12    7.85    0.25
  -7   0 -12    0.63    0.12
   7   0  12    0.84    0.09
  -7   0  12    0.86    0.09
  -7   0  12    0.99    0.11
   8   0  12    8.76    0.28
  -8   0  12    8.58    0.31
  -8   0  12    8.59    0.29
  -8   0 -12    8.11    0.36
  -9   0  12   81.55    1.84
   9   0  12   80.67    1.81
  -9   0  12   80.58    1.82
  -9   0 -12   85.29    1.96
 -10   0  12    1.77    0.15
  10   0  12    1.71    0.13
 -10   0  12    1.77    0.16
 -10   0 -12    1.99    0.23
 -11   0 -12    2.34    0.24
 -11   0  12    2.56    0.17
  11   0  12    2.20    0.15
 -11   0  12    2.18    0.16
 -12   0 -12    0.42    0.14
 -12   0  12    0.28    0.09
  12   0  12    0.28    0.08
  13   0  12    2.86    0.19
 -13   0 -12    3.14    0.31
 -13   0  12    2.73    0.20
 -14   0  12    1.53    0.18
   0  -1  12   -0.04    0.02
   0   1  12   -0.01    0.02
   0   1  12    0.02    0.03
  -1  -1 -12    0.85    0.11
  -1   1  12    0.97    0.05
  -1   1  12    0.87    0.09
  -1  -1  12    0.82    0.06
  -1   1 -12    0.88    0.14
   1   1  12    0.92    0.07
  -2  -1 -12    3.83    0.20
  -2   1  12    3.93    0.16
  -2   1  12    3.91    0.12
  -2  -1  12    3.63    0.13
   2   1  12    3.82    0.14
  -2   1 -12    3.70    0.23
   3  -1  12   52.65    1.15
  -3  -1 -12   53.58    1.25
  -3   1  12   52.83    1.14
  -3   1  12   53.58    1.20
  -3  -1  12   52.72    1.15
   3   1  12   52.30    1.15
  -3   1 -12   51.69    1.29
   3   1  12   52.85    1.16
   4  -1  12    5.99    0.20
  -4  -1 -12    6.19    0.27
  -4   1  12    6.10    0.23
  -4   1  12    6.24    0.19
  -4  -1  12    6.21    0.20
  -4   1 -12    5.81    0.29
   4   1  12    6.03    0.18
   4   1  12    6.20    0.20
   5  -1  12    0.32    0.05
  -5   1  12    0.33    0.07
  -5  -1 -12    0.39    0.09
  -5   1  12    0.28    0.05
   5   1  12    0.39    0.06
  -5   1 -12    0.47    0.12
  -5  -1  12    0.40    0.06
  -6   1  12    0.59    0.09
   6  -1  12    0.49    0.07
  -6   1  12    0.49    0.06
  -6  -1 -12    0.54    0.11
   6   1  12    0.56    0.07
  -6  -1  12    0.44    0.06
  -6   1 -12    0.32    0.10
  -6  -1  12    0.40    0.08
  -7   1  12    0.96    0.09
   7  -1  12    0.90    0.09
  -7   1  12    0.95    0.11
  -7  -1 -12    0.95    0.13
   7   1  12    0.98    0.10
  -7  -1  12    0.70    0.08
  -7   1 -12    0.95    0.16
  -7  -1  12    0.79    0.10
  -8  -1 -12   10.06    0.39
   8  -1  12    9.95    0.30
  -8   1  12    9.73    0.31
  -8   1  12    9.41    0.33
   8   1  12    9.43    0.31
  -8   1 -12    9.84    0.42
  -8  -1  12    9.87    0.32
  -8  -1  12    9.87    0.34
   9  -1  12    2.19    0.14
  -9   1  12    2.27    0.14
  -9  -1 -12    2.06    0.21
  -9   1  12    2.14    0.15
  -9  -1  12    2.39    0.16
  -9   1 -12    1.92    0.22
  -9  -1  12    2.27    0.15
   9   1  12    2.08    0.14
 -10   1  12    3.44    0.19
 -10   1  12    3.62    0.19
 -10  -1 -12    3.53    0.25
  10  -1  12    3.22    0.17
 -10  -1  12    3.32    0.19
 -10  -1  12    3.59    0.20
  10   1  12    3.30    0.18
 -10   1 -12    3.62    0.27
 -11   1  12    1.40    0.14
  11  -1  12    1.46    0.14
 -11  -1 -12    1.47    0.20
 -11   1  12    1.75    0.16
 -11   1 -12    1.52    0.21
  11   1  12    1.40    0.14
 -11  -1  12    1.56    0.15
 -11  -1  12    1.28    0.14
  12  -1  12    0.83    0.11
 -12   1  12    1.05    0.13
 -12  -1 -12    0.90    0.18
  12   1  12    0.76    0.11
 -12   1 -12    1.08    0.20
 -12  -1  12    0.84    0.12
 -13  -1 -12    2.80    0.29
 -13  -1  12    2.78    0.20
  13   1  12    2.94    0.20
 -13   1 -12    2.84    0.30
   0   2  12    3.41    0.10
   0   2  12    3.32    0.14
  -1   2  12    3.80    0.16
  -1  -2 -12    3.88    0.18
  -1   2  12    3.93    0.13
  -1  -2  12    3.98    0.14
  -1   2 -12    4.29    0.26
   1   2  12    3.95    0.15
  -2   2  12    3.94    0.16
  -2  -2 -12    3.67    0.18
  -2   2 -12    3.05    0.23
  -2  -2  12    3.57    0.13
   2   2  12    3.61    0.14
  -3   2  12    2.29    0.12
   3  -2  12    2.30    0.10
  -3  -2 -12    1.98    0.14
  -3   2  12    2.03    0.10
   3   2  12    2.09    0.11
   3   2  12    2.11    0.10
  -3   2 -12    1.89    0.21
  -3  -2  12    1.89    0.10
   4  -2  12    3.11    0.12
  -4   2  12    2.96    0.15
  -4   2  12    3.09    0.13
  -4  -2 -12    3.15    0.18
  -4   2 -12    2.39    0.23
   4   2  12    2.87    0.13
  -4  -2  12    2.87    0.13
   4   2  12    2.98    0.11
  -5   2  12    0.20    0.06
  -5   2  12    0.26    0.05
   5  -2  12    0.22    0.05
  -5  -2 -12    0.34    0.08
   5   2  12    0.27    0.06
  -5   2 -12    0.11    0.09
  -5  -2  12    0.22    0.05
  -6   2  12    1.05    0.12
   6  -2  12    1.06    0.09
  -6   2  12    1.01    0.11
  -6  -2 -12    1.09    0.13
   6   2  12    1.27    0.11
  -6   2 -12    1.06    0.17
  -6  -2  12    0.97    0.10
   7  -2  12    8.80    0.27
  -7   2  12    8.99    0.31
  -7  -2 -12    9.19    0.34
  -7  -2  12    8.75    0.29
   7   2  12    8.24    0.28
  -7   2 -12    8.60    0.39
  -8  -2 -12    1.30    0.16
  -8   2  12    1.16    0.12
   8  -2  12    1.09    0.10
  -8  -2  12    0.96    0.12
  -8   2 -12    1.21    0.17
  -8  -2  12    1.00    0.11
   8   2  12    1.18    0.12
  -9  -2 -12    1.79    0.18
  -9   2  12    1.89    0.16
   9  -2  12    1.91    0.12
  -9  -2  12    1.80    0.13
  -9   2 -12    2.10    0.23
  -9  -2  12    2.02    0.15
   9   2  12    1.99    0.14
 -10   2  12    1.99    0.15
  10  -2  12    2.25    0.14
 -10  -2 -12    2.34    0.22
  10   2  12    2.45    0.16
 -10  -2  12    2.35    0.16
 -10   2 -12    2.08    0.23
 -10  -2  12    2.71    0.17
 -11   2  12    0.98    0.12
 -11  -2 -12    0.78    0.15
 -11  -2  12    0.83    0.12
  11   2  12    0.97    0.12
 -11  -2  12    1.00    0.13
 -11   2 -12    0.80    0.18
 -12  -2 -12    1.00    0.17
 -12   2 -12    0.59    0.16
  12   2  12    0.69    0.11
 -12  -2  12    0.65    0.12
 -13  -2 -12    0.09    0.10
 -13  -2  12    0.08    0.08
  13   2  12    0.06    0.07
 -13   2 -12    0.03    0.12
 -14  -2 -12    0.93    0.26
   0   3  12    0.02    0.04
  -1   3  12    1.24    0.09
  -1  -3  12    1.59    0.09
   1   3  12    1.72    0.10
  -1   3 -12    1.97    0.22
  -2   3  12    0.24    0.05
  -2  -3  12    0.10    0.03
   2   3  12    0.13    0.04
  -2   3 -12    0.09    0.10
   3  -3  12    0.60    0.06
  -3   3  12    0.61    0.08
  -3  -3  12    0.53    0.06
   3   3  12    0.52    0.06
  -3   3 -12    0.57    0.14
   3   3  12    0.58    0.07
   4  -3  12    6.17    0.19
  -4   3  12    6.13    0.23
  -4  -3  12    6.01    0.21
   4   3  12    6.15    0.19
   4   3  12    6.21    0.21
  -4   3 -12    6.25    0.32
   5  -3  12    0.43    0.06
  -5   3  12    0.58    0.08
   5   3  12    0.49    0.07
  -5   3 -12    0.49    0.12
  -5  -3  12    0.65    0.08
   6  -3  12    0.30    0.05
  -6   3  12    0.41    0.08
  -6  -3  12    0.37    0.07
   6   3  12    0.21    0.06
  -6   3 -12    0.35    0.12
  -7  -3 -12    8.15    0.43
  -7   3  12    7.95    0.29
   7  -3  12    8.17    0.25
  -7  -3  12    8.24    0.28
   7   3  12    8.39    0.28
  -7   3 -12    8.53    0.41
  -8   3  12    1.47    0.14
  -8  -3 -12    1.46    0.17
  -8   3 -12    1.35    0.20
   8   3  12    1.41    0.13
  -8  -3  12    1.17    0.12
  -9  -3 -12   14.54    0.49
  -9   3  12   14.97    0.45
  -9   3 -12   13.71    0.57
   9   3  12   14.60    0.44
  -9  -3  12   14.66    0.45
 -10  -3 -12    1.52    0.19
 -10   3  12    1.70    0.15
 -10   3 -12    1.44    0.22
  10   3  12    1.39    0.14
 -10  -3  12    1.37    0.14
 -10  -3  12    1.09    0.13
 -11  -3 -12   12.07    0.51
 -11   3  12   12.69    0.41
 -11  -3  12   13.01    0.42
  11   3  12   12.88    0.42
 -11  -3  12   12.42    0.42
 -11   3 -12   12.08    0.55
  12   3  12    0.04    0.07
 -12   3 -12   -0.16    0.11
 -12  -3  12    0.08    0.08
  13   3  12    2.98    0.20
 -13   3 -12    2.90    0.32
 -13  -3  12    3.20    0.22
   0  -4  12    4.40    0.16
   0   4  12    4.56    0.17
  -1   4  12    3.25    0.15
  -1  -4  12    3.63    0.14
  -1   4 -12    3.18    0.25
   1   4  12    3.24    0.14
  -2   4  12    2.59    0.13
  -2  -4  12    2.44    0.12
   2   4  12    2.78    0.12
  -2   4 -12    2.72    0.27
   3  -4  12    0.13    0.03
  -3   4  12    0.18    0.06
  -3  -4  12    0.18    0.04
   3   4  12    0.11    0.04
  -3   4 -12    0.05    0.09
   3   4  12    0.09    0.04
  -4   4  12    0.04    0.04
   4  -4  12    0.02    0.03
   4   4  12    0.04    0.03
  -4   4 -12   -0.04    0.09
  -4  -4  12    0.01    0.03
   4   4  12    0.12    0.05
  -5   4  12    0.42    0.07
  -5  -4  12    0.44    0.07
  -5   4 -12    0.47    0.13
   5   4  12    0.40    0.07
  -6   4  12    0.62    0.09
  -6   4 -12    1.21    0.19
  -6  -4  12    1.01    0.10
   6   4  12    0.89    0.10
  -7   4  12    0.35    0.07
  -7  -4  12    0.42    0.08
   7   4  12    0.18    0.06
  -7   4 -12    0.33    0.13
  -8   4  12    0.79    0.10
   8   4  12    0.81    0.11
  -8   4 -12    0.77    0.18
  -8  -4  12    0.67    0.10
  -9   4  12    0.24    0.08
   9   4  12    0.12    0.07
  -9   4 -12    0.11    0.13
  -9  -4  12    0.08    0.06
 -10   4  12    1.99    0.17
 -10   4 -12    1.88    0.26
 -10  -4  12    2.00    0.17
  10   4  12    2.28    0.16
 -11   4  12    1.08    0.12
  11   4  12    1.47    0.15
 -11   4 -12    1.56    0.24
 -11  -4  12    1.51    0.16
 -12  -4  12    0.69    0.13
 -12   4 -12    0.96    0.22
  12   4  12    0.57    0.11
   0  -5  12    0.00    0.03
   0   5  12   -0.04    0.04
  -1   5  12   14.30    0.39
   1   5  12   13.51    0.38
  -1   5 -12   15.49    0.59
  -1  -5  12   13.88    0.38
  -2   5  12    1.94    0.12
  -2   5 -12    2.00    0.24
   2   5  12    1.70    0.10
  -2  -5  12    1.75    0.11
   2   5  12    1.74    0.10
  -3   5  12    0.11    0.05
  -3   5 -12    0.13    0.11
   3   5  12    0.19    0.05
   3   5  12    0.17    0.05
  -3  -5  12    0.08    0.04
  -4   5  12    4.03    0.18
  -4  -5  12    4.33    0.17
   4   5  12    3.98    0.16
   4   5  12    3.96    0.17
  -4   5 -12    4.29    0.30
  -5   5  12   16.03    0.46
   5   5  12   16.48    0.45
  -5  -5  12   16.94    0.45
  -5   5 -12   15.43    0.61
  -6   5  12    4.16    0.20
   6   5  12    4.38    0.20
  -6  -5  12    4.62    0.20
  -6   5 -12    4.93    0.34
  -7   5  12    0.60    0.09
  -7  -5  12    0.70    0.09
   7   5  12    0.64    0.10
  -7   5 -12    0.50    0.15
  -8   5  12    1.91    0.14
  -8  -5  12    1.99    0.14
   8   5  12    1.90    0.14
  -8   5 -12    1.97    0.25
  -9   5  12    7.79    0.30
  -9   5 -12    7.05    0.42
   9   5  12    7.60    0.29
  -9  -5  12    7.59    0.30
 -10   5  12    0.98    0.12
  10   5  12    0.99    0.13
 -10   5 -12    1.02    0.22
 -10  -5  12    0.86    0.12
 -11   5  12    0.51    0.09
  11   5  12    0.49    0.10
 -11  -5  12    0.44    0.10
 -11   5 -12    0.20    0.14
  12   5  12    0.77    0.12
 -12  -5  12    1.09    0.14
 -12   5 -12    0.65    0.19
   0   6  12    2.58    0.14
   0  -6  12    2.69    0.13
  -1   6  12    6.66    0.24
   1   6  12    6.25    0.23
  -1  -6  12    6.39    0.22
  -1   6 -12    6.69    0.40
  -2   6  12    1.02    0.10
   2   6  12    0.81    0.08
  -2  -6  12    0.92    0.09
  -2   6 -12    0.62    0.17
   2   6  12    0.86    0.09
  -3   6  12    8.51    0.29
  -3   6 -12    7.96    0.43
   3   6  12    8.36    0.26
  -3  -6  12    7.78    0.26
   3   6  12    8.38    0.27
  -4   6  12    0.23    0.07
  -4   6 -12    0.17    0.13
  -4  -6  12    0.15    0.05
   4   6  12    0.15    0.06
   4   6  12    0.25    0.06
  -5   6  12   18.07    0.50
  -5   6 -12   17.35    0.68
   5   6  12   17.68    0.48
  -5  -6  12   17.71    0.49
  -6   6  12    0.11    0.06
  -6  -6  12    0.03    0.05
  -6   6 -12    0.03    0.12
   6   6  12    0.04    0.05
  -7   6  12    0.05    0.05
   7   6  12    0.04    0.05
  -7  -6  12   -0.01    0.04
  -7   6 -12    0.02    0.12
  -8   6  12    0.88    0.12
   8   6  12    0.86    0.11
  -8   6 -12    0.64    0.18
  -8  -6  12    0.99    0.12
  -9   6  12    0.19    0.07
   9   6  12    0.31    0.09
  -9   6 -12    0.28    0.15
  -9  -6  12    0.42    0.09
 -10   6  12    1.70    0.16
  10   6  12    1.86    0.17
 -10  -6  12    1.89    0.18
 -10   6 -12    2.45    0.31
 -11   6  12   12.25    0.41
 -11  -6  12   11.88    0.43
 -11   6 -12   12.31    0.61
  11   6  12   12.56    0.43
 -12  -6  12   -0.10    0.11
   0   7  12    0.01    0.05
   0  -7  12    0.01    0.04
  -1   7  12   18.02    0.49
  -1  -7  12   18.38    0.48
  -1   7 -12   16.90    0.69
   1   7  12   17.93    0.49
  -2   7  12    1.97    0.13
   2   7  12    2.36    0.13
  -2   7 -12    2.27    0.29
  -2  -7  12    2.04    0.12
   2   7  12    2.07    0.13
  -3   7  12    3.98    0.19
   3   7  12    3.94    0.18
  -3  -7  12    4.42    0.19
   3   7  12    4.16    0.18
  -3   7 -12    4.21    0.38
  -4   7  12    0.08    0.05
  -4  -7  12    0.16    0.05
  -4   7 -12   -0.03    0.12
   4   7  12    0.07    0.05
  -5   7  12    2.14    0.15
  -5   7 -12    2.78    0.31
  -5  -7  12    2.36    0.14
   5   7  12    2.42    0.14
  -6   7  12    0.32    0.08
   6   7  12    0.28    0.07
  -6  -7  12    0.30    0.07
  -6   7 -12    0.33    0.15
  -7   7  12    2.04    0.15
  -7   7 -12    1.67    0.27
  -7  -7  12    1.86    0.14
   7   7  12    1.95    0.14
  -8   7  12   -0.06    0.05
  -8   7 -12    0.20    0.15
  -8  -7  12   -0.01    0.05
   8   7  12    0.01    0.06
  -9   7  12    1.71    0.16
  -9   7 -12    1.55    0.26
   9   7  12    1.64    0.15
  -9  -7  12    1.82    0.17
 -10   7  12    6.03    0.28
 -10   7 -12    6.27    0.44
  10   7  12    6.46    0.29
 -10  -7  12    7.25    0.31
 -11   7  12    1.83    0.17
 -11   7 -12    1.20    0.25
  11   7  12    1.39    0.16
 -11  -7  12    1.25    0.15
   0   8  12    8.28    0.30
   0  -8  12    7.99    0.27
  -1   8  12   11.73    0.38
   1   8  12   12.15    0.38
  -1  -8  12   12.69    0.37
   1   8  12   12.02    0.35
  -2   8  12    0.01    0.06
  -2  -8  12   -0.03    0.04
   2   8  12   -0.03    0.05
  -2   8 -12    0.04    0.14
   2   8  12   -0.02    0.04
  -3   8  12    0.64    0.10
  -3  -8  12    0.81    0.10
   3   8  12    0.51    0.08
   3   8  12    0.70    0.10
  -3   8 -12    0.99    0.23
  -4   8  12    2.64    0.16
   4   8  12    2.58    0.15
  -4  -8  12    2.55    0.15
  -4   8 -12    2.35    0.30
  -5   8  12    2.34    0.16
  -5   8 -12    2.76    0.33
   5   8  12    2.48    0.15
  -5  -8  12    2.19    0.14
  -6   8  12    0.14    0.07
  -6  -8  12    0.05    0.05
   6   8  12    0.11    0.06
  -6   8 -12    0.12    0.16
  -7   8  12    0.60    0.11
  -7  -8  12    0.58    0.10
  -7   8 -12    0.50    0.18
   7   8  12    0.51    0.10
  -8   8  12    0.64    0.11
  -8  -8  12    0.80    0.12
  -8   8 -12    0.39    0.18
   8   8  12    0.53    0.10
  -9   8  12    0.84    0.12
   9   8  12    1.11    0.14
  -9  -8  12    1.02    0.13
  -9   8 -12    1.19    0.26
 -10   8  12    0.65    0.11
 -10  -8  12    0.63    0.12
  10   8  12    0.44    0.10
 -10   8 -12    0.24    0.17
 -11   8  12    0.01    0.07
   0   9  12    0.11    0.07
   0  -9  12    0.03    0.05
  -1   9  12    0.09    0.07
   1  -9  12    0.06    0.05
   1   9  12    0.08    0.06
  -1  -9  12    0.05    0.05
   1   9  12   -0.01    0.04
  -2   9  12    2.07    0.15
  -2  -9  12    2.19    0.14
  -2   9 -12    2.48    0.31
   2   9  12    2.04    0.15
   2   9  12    1.87    0.13
  -3   9  12    0.11    0.07
   3   9  12    0.03    0.06
  -3  -9  12    0.03    0.05
   3   9  12    0.13    0.06
  -3   9 -12    0.05    0.13
  -4   9  12    0.30    0.08
   4   9  12    0.20    0.06
  -4  -9  12    0.41    0.08
  -4   9 -12    0.35    0.16
  -5   9  12    2.68    0.18
  -5   9 -12    2.59    0.33
   5   9  12    2.43    0.15
  -5  -9  12    2.66    0.16
  -6   9  12    0.03    0.06
  -6  -9  12    0.14    0.07
  -6   9 -12   -0.02    0.15
   6   9  12    0.04    0.06
  -7   9  12    0.11    0.07
  -7   9 -12    0.13    0.16
   7   9  12    0.13    0.07
  -7  -9  12    0.13    0.07
  -8   9  12    0.06    0.08
  -8  -9  12    0.04    0.07
   8   9  12    0.03    0.06
  -8   9 -12    0.17    0.16
  -9   9  12   -0.02    0.07
  -9  -9  12    0.00    0.07
   9   9  12    0.04    0.08
  -9   9 -12    0.20    0.18
 -10   9  12    4.85    0.26
  10   9  12    4.88    0.29
   0 -10  12    1.66    0.13
   0  10  12    1.72    0.12
   0  10  12    1.66    0.16
   1 -10  12    0.16    0.06
  -1  10  12   -0.10    0.05
  -1 -10  12    0.01    0.05
   1  10  12    0.05    0.07
   1  10  12    0.07    0.05
  -2  10  12    0.84    0.12
   2  10  12    0.86    0.12
   2  10  12    0.87    0.10
  -2 -10  12    0.89    0.11
  -3  10  12    2.64    0.18
   3  10  12    2.57    0.15
  -3 -10  12    3.24    0.18
  -3  10 -12    3.27    0.37
   3  10  12    3.51    0.20
  -4  10  12    0.05    0.07
  -4  10 -12    0.09    0.16
   4  10  12    0.02    0.05
  -4 -10  12    0.07    0.06
  -5  10  12    0.06    0.08
  -5 -10  12   -0.04    0.05
   5  10  12   -0.01    0.05
  -5  10 -12   -0.09    0.14
  -6  10  12    1.39    0.16
   6  10  12    1.99    0.17
  -6 -10  12    1.58    0.15
  -6  10 -12    1.29    0.28
  -7  10  12    0.56    0.12
  -7 -10  12    0.58    0.11
   7  10  12    0.77    0.11
  -7  10 -12    0.61    0.21
  -8  10  12    1.72    0.18
  -8  10 -12    1.83    0.31
  -8 -10  12    1.76    0.17
   8  10  12    1.84    0.17
  -9  10  12    0.01    0.08
   9  10  12   -0.04    0.07
   0  11  12   -0.07    0.06
   0 -11  12   -0.11    0.05
   1 -11  12    2.33    0.15
  -1  11  12    2.41    0.18
  -1 -11  12    2.39    0.16
   1  11  12    2.30    0.15
   1  11  12    2.33    0.18
  -2  11  12    0.20    0.09
   2 -11  12    0.23    0.08
  -2 -11  12    0.35    0.07
   2  11  12    0.29    0.10
   2  11  12    0.31    0.07
  -3  11  12    3.96    0.23
  -3 -11  12    4.03    0.21
   3  11  12    4.26    0.20
   3  11  12    4.49    0.24
  -3  11 -12    3.91    0.42
  -4  11  12    0.07    0.07
  -4  11 -12   -0.07    0.14
  -4 -11  12    0.03    0.05
   4  11  12    0.06    0.06
  -5  11  12    4.68    0.26
  -5  11 -12    4.34    0.45
   5  11  12    4.78    0.23
  -5 -11  12    5.27    0.24
  -6  11  12   -0.02    0.07
  -6 -11  12    0.00    0.06
   6  11  12    0.03    0.07
  -6  11 -12    0.01    0.16
  -7  11  12    1.80    0.19
  -7  11 -12    1.99    0.34
   7  11  12    2.22    0.17
  -7 -11  12    2.24    0.20
   8  11  12    0.07    0.08
   0 -12  12    6.65    0.27
   0  12  12    6.72    0.32
  -1  12  12    0.05    0.07
   1 -12  12    0.02    0.06
   1  12  12   -0.07    0.07
  -1 -12  12   -0.09    0.05
  -2  12  12    0.15    0.10
   2 -12  12    0.20    0.07
   2  12  12    0.27    0.10
  -2 -12  12    0.18    0.08
  -3  12  12    4.08    0.25
  -3 -12  12    4.21    0.22
   3  12  12    3.99    0.25
  -4  12  12    0.76    0.14
  -4 -12  12    0.48    0.10
  -4  12 -12    0.64    0.23
  -5  12  12    0.36    0.12
  -5 -12  12    0.41    0.10
  -5  12 -12    0.23    0.21
  -6  12 -12    1.65    0.37
   6  12  12    1.18    0.14
   7  12  12    0.04    0.08
   0 -13  12    0.08    0.07
   0  13  12   -0.03    0.08
  -1  13  12    0.52    0.12
   1 -13  12    0.58    0.10
   1  13  12    0.36    0.11
  -1 -13  12    0.53    0.11
  -2  13  12    1.25    0.17
   2 -13  12    1.29    0.14
  -2 -13  12    1.15    0.14
   2  13  12    1.31    0.17
  -3  13  12    0.00    0.11
   3 -13  12   -0.03    0.06
  -3 -13  12    0.05    0.07
   3  13  12    0.13    0.09
   2  14  12   -0.01    0.15
  -1   0 -13    0.00    0.07
  -1   0  13    0.06    0.02
  -1   0  13   -0.01    0.03
   1   0  13    0.00    0.03
  -2   0  13    0.00    0.02
  -2   0 -13   -0.07    0.06
   2   0  13   -0.03    0.03
  -2   0  13   -0.03    0.03
   3   0  13   -0.01    0.03
  -3   0 -13   -0.10    0.06
   3   0  13   -0.02    0.03
  -3   0  13    0.01    0.02
  -3   0  13    0.03    0.04
  -4   0  13    0.00    0.03
   4   0  13   -0.02    0.03
  -4   0 -13   -0.10    0.06
   4   0  13    0.01    0.03
  -4   0  13   -0.02    0.04
  -5   0  13    0.01    0.04
   5   0  13   -0.02    0.03
  -5   0 -13    0.04    0.08
  -5   0  13   -0.03    0.03
  -6   0 -13    0.05    0.08
  -6   0  13    0.02    0.03
   6   0  13   -0.02    0.04
  -6   0  13    0.03    0.05
  -7   0  13    0.01    0.05
  -7   0 -13   -0.05    0.07
   7   0  13    0.01    0.04
  -7   0  13    0.00    0.04
  -8   0 -13    0.00    0.09
   8   0  13    0.02    0.05
  -8   0  13   -0.03    0.05
  -8   0  13   -0.04    0.04
  -9   0 -13   -0.08    0.09
  -9   0  13    0.03    0.06
   9   0  13    0.02    0.06
  -9   0  13    0.01    0.05
 -10   0  13   -0.05    0.06
 -10   0 -13   -0.03    0.09
  10   0  13    0.01    0.05
 -10   0  13   -0.09    0.05
 -11   0  13   -0.07    0.05
  11   0  13   -0.03    0.06
 -11   0 -13   -0.01    0.10
 -11   0  13   -0.06    0.05
 -12   0 -13   -0.01    0.11
 -12   0  13   -0.03    0.06
  12   0  13    0.04    0.06
  13   0  13   -0.03    0.06
 -13   0  13    0.01    0.08
 -13   0 -13   -0.02    0.11
   0   1  13   -0.02    0.02
   0  -1  13   -0.01    0.02
   0   1  13    0.06    0.04
  -1   1  13    1.97    0.11
  -1  -1 -13    1.84    0.16
  -1   1  13    1.71    0.07
  -1  -1  13    1.72    0.08
   1   1  13    1.74    0.10
  -1   1 -13    1.90    0.19
  -2   1  13    3.27    0.11
  -2  -1 -13    3.25    0.20
  -2   1  13    3.33    0.16
   2   1  13    3.17    0.13
  -2   1 -13    3.12    0.22
  -2  -1  13    3.14    0.12
   3  -1  13    5.19    0.18
  -3   1  13    5.45    0.21
  -3   1  13    5.60    0.17
  -3  -1 -13    5.27    0.25
   3   1  13    5.57    0.18
  -3  -1  13    5.37    0.18
  -3   1 -13    5.50    0.29
   3   1  13    5.43    0.19
  -4  -1 -13    3.52    0.21
  -4   1  13    3.35    0.17
   4  -1  13    3.52    0.14
  -4   1  13    3.33    0.13
   4  -1  13    3.40    0.14
  -4  -1  13    3.49    0.14
  -4   1 -13    3.88    0.24
   4   1  13    3.56    0.15
  -5   1  13    6.26    0.20
   5  -1  13    6.29    0.21
  -5  -1 -13    6.70    0.29
  -5   1  13    6.16    0.24
  -5  -1  13    5.79    0.24
   5   1  13    6.58    0.22
  -5  -1  13    6.61    0.21
  -5   1 -13    5.96    0.31
  -6   1  13    5.18    0.22
  -6   1  13    5.12    0.19
  -6  -1 -13    5.17    0.27
   6  -1  13    5.02    0.19
   6   1  13    5.16    0.20
  -6  -1  13    5.47    0.20
  -6   1 -13    5.37    0.30
  -6  -1  13    5.43    0.23
  -7   1  13    8.06    0.27
   7  -1  13    8.46    0.27
  -7   1  13    8.39    0.30
  -7  -1 -13    8.59    0.36
  -7   1 -13    9.33    0.40
   7   1  13    8.08    0.28
  -7  -1  13    8.47    0.31
  -7  -1  13    8.27    0.28
  -8   1  13    1.55    0.12
  -8  -1 -13    1.32    0.17
   8  -1  13    1.56    0.12
  -8   1  13    1.76    0.15
  -8  -1  13    1.75    0.16
  -8   1 -13    2.13    0.23
  -8  -1  13    1.77    0.13
   8   1  13    1.29    0.12
   9  -1  13    2.75    0.15
  -9  -1 -13    2.71    0.24
  -9   1  13    2.62    0.18
  -9   1  13    2.57    0.16
  -9  -1  13    2.47    0.17
  -9   1 -13    2.71    0.27
  -9  -1  13    2.80    0.16
   9   1  13    2.65    0.16
  10  -1  13    6.86    0.26
 -10  -1 -13    7.68    0.37
 -10   1  13    6.90    0.29
 -10  -1  13    7.14    0.28
 -10   1 -13    8.33    0.41
  10   1  13    6.90    0.27
 -10  -1  13    7.01    0.29
 -11   1  13    0.43    0.09
  11  -1  13    0.57    0.10
 -11  -1 -13    0.65    0.15
 -11   1 -13    0.31    0.14
 -11  -1  13    0.43    0.10
  11   1  13    0.45    0.09
 -11  -1  13    0.53    0.10
  12  -1  13    0.83    0.12
 -12  -1 -13    0.63    0.16
 -12  -1  13    0.70    0.12
  12   1  13    1.07    0.13
 -12   1 -13    0.78    0.18
 -13  -1 -13    2.03    0.25
  13   1  13    1.58    0.16
 -13  -1  13    1.87    0.19
 -13   1 -13    1.78    0.25
   0  -2  13   11.27    0.30
   0   2  13   11.20    0.32
  -1   2  13   11.76    0.34
   1   2  13   12.05    0.33
  -1  -2  13   11.69    0.31
  -1   2 -13   10.91    0.45
  -2   2  13    2.36    0.13
  -2   2 -13    2.34    0.22
   2   2  13    2.39    0.11
  -2  -2  13    2.27    0.11
  -3   2  13    0.06    0.04
   3  -2  13    0.08    0.04
   3   2  13    0.00    0.03
  -3  -2  13   -0.01    0.03
   3   2  13    0.05    0.04
  -3   2 -13    0.08    0.09
  -4   2  13    1.40    0.11
   4  -2  13    1.28    0.08
   4   2  13    1.32    0.10
  -4  -2  13    1.24    0.09
  -4   2 -13    1.48    0.18
   5  -2  13    0.33    0.05
  -5  -2 -13    0.26    0.09
  -5   2  13    0.25    0.06
  -5  -2  13    0.38    0.06
   5   2  13    0.18    0.05
  -5   2 -13    0.32    0.12
  -6   2  13   13.42    0.41
  -6  -2 -13   13.65    0.45
   6  -2  13   13.70    0.37
  -6   2 -13   13.74    0.52
   6   2  13   14.15    0.39
  -6  -2  13   14.15    0.39
  -7  -2 -13    0.12    0.08
   7  -2  13    0.10    0.05
  -7   2  13    0.04    0.05
   7   2  13    0.05    0.05
  -7   2 -13    0.15    0.11
  -7  -2  13    0.04    0.05
   8  -2  13    0.09    0.05
  -8   2  13    0.12    0.06
  -8  -2 -13    0.06    0.08
  -8  -2  13    0.12    0.06
   8   2  13    0.05    0.06
  -8  -2  13    0.05    0.05
  -8   2 -13   -0.03    0.10
   9  -2  13    5.93    0.23
  -9  -2 -13    6.03    0.31
  -9   2  13    5.85    0.26
  -9  -2  13    6.04    0.25
  -9   2 -13    5.75    0.35
  -9  -2  13    6.47    0.27
   9   2  13    6.03    0.25
  10  -2  13    0.73    0.11
 -10   2  13    0.84    0.11
 -10  -2 -13    0.91    0.15
  10   2  13    0.96    0.12
 -10  -2  13    0.90    0.12
 -10   2 -13    0.66    0.16
 -10  -2  13    0.69    0.11
 -11  -2 -13    2.29    0.24
 -11   2  13    1.79    0.16
 -11  -2  13    1.90    0.17
 -11  -2  13    2.18    0.19
  11   2  13    1.94    0.15
 -11   2 -13    1.87    0.24
 -12  -2 -13    0.00    0.09
 -12   2 -13    0.29    0.15
 -12  -2  13    0.17    0.08
  12   2  13    0.06    0.07
 -13  -2 -13    0.32    0.18
 -13   2 -13    0.65    0.18
  13   2  13    0.46    0.10
 -13  -2  13    0.36    0.10
   0   3  13   -0.01    0.04
   0  -3  13   -0.02    0.02
  -1   3  13    0.94    0.09
  -1   3 -13    0.94    0.16
  -1  -3  13    1.04    0.08
   1   3  13    0.93    0.08
  -2   3  13    1.45    0.11
  -2   3 -13    1.48    0.20
  -2  -3  13    1.17    0.08
   2   3  13    1.17    0.08
   3  -3  13    1.81    0.09
  -3   3  13    2.13    0.13
   3   3  13    1.79    0.11
   3   3  13    1.69    0.09
  -3   3 -13    1.85    0.21
  -3  -3  13    1.90    0.10
   4  -3  13    0.09    0.04
  -4   3  13    0.13    0.06
   4   3  13    0.27    0.06
  -4  -3  13    0.11    0.04
  -4   3 -13    0.24    0.11
   5  -3  13    0.79    0.07
  -5   3  13    0.63    0.09
  -5   3 -13    0.76    0.16
   5   3  13    0.59    0.08
  -5  -3  13    0.86    0.09
  -6   3  13    6.98    0.27
   6  -3  13    7.54    0.23
   6   3  13    6.93    0.25
  -6   3 -13    7.62    0.38
  -6  -3  13    7.48    0.25
   7  -3  13    1.10    0.11
  -7   3  13    1.13    0.12
  -7  -3  13    1.13    0.11
  -7   3 -13    1.14    0.19
   7   3  13    1.58    0.12
  -8   3  13    2.58    0.17
   8   3  13    2.36    0.15
  -8   3 -13    3.06    0.29
  -8  -3  13    2.53    0.15
  -9   3  13    0.25    0.08
   9   3  13    0.18    0.07
  -9  -3  13    0.29    0.08
  -9   3 -13    0.22    0.12
 -10   3  13    2.59    0.17
  10   3  13    2.97    0.18
 -10  -3  13    2.88    0.19
 -10  -3  13    2.67    0.18
 -10   3 -13    2.66    0.29
 -11   3  13    0.02    0.07
 -11   3 -13    0.18    0.15
  11   3  13    0.03    0.07
 -11  -3  13    0.13    0.07
 -11  -3  13    0.02    0.06
 -12   3  13    0.70    0.15
 -12   3 -13    0.52    0.16
  12   3  13    0.71    0.12
 -12  -3  13    0.75    0.12
 -13  -3  13    0.06    0.08
   0  -4  13   49.10    1.10
   0   4  13   49.53    1.12
  -1   4  13    0.83    0.09
  -1   4 -13    1.50    0.21
  -1  -4  13    0.72    0.08
   1   4  13    0.78    0.08
  -2   4  13    2.00    0.12
  -2   4 -13    1.53    0.21
  -2  -4  13    1.68    0.10
   2   4  13    1.68    0.10
  -3   4  13    2.68    0.15
   3  -4  13    2.34    0.10
  -3  -4  13    2.33    0.12
   3   4  13    2.82    0.14
   3   4  13    2.53    0.12
  -3   4 -13    2.30    0.25
  -4   4  13    1.47    0.11
  -4   4 -13    1.10    0.19
   4   4  13    1.46    0.11
  -4  -4  13    1.55    0.10
  -5   4  13    3.65    0.18
  -5  -4  13    3.66    0.16
  -5   4 -13    3.70    0.29
   5   4  13    3.69    0.17
  -6   4  13    8.24    0.29
  -6   4 -13    7.43    0.40
   6   4  13    7.81    0.27
  -6  -4  13    8.31    0.28
  -7   4  13    4.77    0.22
  -7  -4  13    4.66    0.21
   7   4  13    5.14    0.21
  -7   4 -13    4.58    0.33
  -8   4  13    6.91    0.28
  -8  -4  13    7.12    0.27
   8   4  13    7.23    0.27
  -8   4 -13    7.61    0.41
  -9   4  13    0.21    0.08
  -9  -4  13    0.26    0.07
   9   4  13    0.16    0.07
  -9   4 -13    0.43    0.15
 -10   4  13    0.39    0.09
 -10   4 -13    0.52    0.17
  10   4  13    0.64    0.11
 -10  -4  13    0.64    0.11
 -11   4  13   -0.01    0.06
 -11  -4  13    0.00    0.06
  11   4  13   -0.02    0.06
 -11   4 -13    0.13    0.14
 -11  -4  13    0.00    0.06
 -12   4  13    0.25    0.10
 -12  -4  13    0.31    0.10
 -12   4 -13    0.63    0.20
  12   4  13    0.30    0.10
   0   5  13   -0.02    0.04
   0  -5  13   -0.01    0.03
  -1   5  13   14.78    0.41
  -1   5 -13   14.07    0.58
  -1  -5  13   14.93    0.40
   1   5  13   14.76    0.40
  -2   5  13    0.73    0.09
   2   5  13    0.73    0.08
   2   5  13    0.69    0.08
  -2  -5  13    0.95    0.09
  -3   5  13    1.03    0.11
   3   5  13    0.97    0.09
  -3   5 -13    0.96    0.20
   3   5  13    1.15    0.11
  -3  -5  13    1.27    0.10
  -4   5  13    0.35    0.07
  -4  -5  13    0.22    0.06
  -4   5 -13    0.14    0.12
   4   5  13    0.24    0.06
  -5   5  13    2.53    0.15
   5   5  13    2.38    0.14
  -5   5 -13    2.72    0.29
  -5  -5  13    2.46    0.14
  -6   5  13   10.27    0.34
  -6  -5  13    9.47    0.32
   6   5  13   10.81    0.34
  -6   5 -13    9.92    0.49
  -7   5  13    0.36    0.08
   7   5  13    0.31    0.07
  -7  -5  13    0.55    0.09
  -7   5 -13    0.44    0.16
  -8   5  13    1.08    0.12
  -8  -5  13    1.24    0.13
   8   5  13    1.32    0.14
  -8   5 -13    1.59    0.23
  -9   5  13    0.60    0.10
  -9   5 -13    0.79    0.19
  -9  -5  13    0.47    0.09
   9   5  13    0.49    0.10
 -10   5  13    5.33    0.25
 -10  -5  13    5.27    0.25
 -10   5 -13    6.31    0.43
  10   5  13    5.65    0.26
 -11   5  13    0.18    0.08
  11   5  13    0.13    0.08
 -11   5 -13    0.04    0.13
 -11  -5  13    0.42    0.10
 -12   5  13    0.06    0.07
 -12  -5  13    0.09    0.08
 -12   5 -13    0.18    0.17
   0   6  13   34.10    0.82
   0  -6  13   33.98    0.80
  -1   6 -13    1.37    0.21
  -2   6  13    8.55    0.29
  -2   6 -13    7.61    0.44
   2   6  13    8.45    0.27
  -2  -6  13    8.50    0.28
   2   6  13    8.49    0.27
  -3   6  13    1.06    0.11
  -3   6 -13    1.29    0.22
   3   6  13    1.07    0.10
  -3  -6  13    1.27    0.11
   3   6  13    1.14    0.10
  -4   6  13    1.06    0.12
  -4   6 -13    0.73    0.18
  -4  -6  13    0.87    0.10
   4   6  13    0.78    0.09
  -5   6  13   10.49    0.36
   5   6  13   11.28    0.35
  -5  -6  13   11.19    0.35
  -5   6 -13   11.18    0.54
  -6   6  13    1.79    0.14
  -6   6 -13    2.07    0.28
  -6  -6  13    2.25    0.14
   6   6  13    1.67    0.13
  -7   6  13    0.70    0.11
  -7   6 -13    1.03    0.22
   7   6  13    0.71    0.10
  -7  -6  13    0.70    0.10
  -8   6  13    0.61    0.10
   8   6  13    0.44    0.10
  -8  -6  13    0.63    0.10
  -8   6 -13    0.80    0.19
  -9   6  13   -0.04    0.06
  -9  -6  13    0.03    0.06
  -9   6 -13    0.03    0.13
   9   6  13   -0.01    0.06
 -10   6  13    0.02    0.07
 -10  -6  13    0.06    0.07
  10   6  13    0.01    0.06
 -10   6 -13    0.22    0.17
 -11   6  13    0.09    0.07
 -11   6 -13    0.14    0.18
 -11  -6  13    0.05    0.07
  11   6  13   -0.02    0.07
 -12   6  13    0.57    0.15
   0  -7  13   -0.01    0.05
   0   7  13   -0.04    0.06
  -1   7  13    2.34    0.14
   1   7  13    2.23    0.15
  -1  -7  13    2.39    0.14
  -2   7  13   15.41    0.44
  -2  -7  13   14.80    0.42
   2   7  13   14.86    0.42
  -2   7 -13   15.45    0.66
   2   7  13   15.18    0.43
  -3   7  13    0.28    0.08
  -3   7 -13    0.40    0.17
   3   7  13    0.36    0.07
   3   7  13    0.33    0.07
  -3  -7  13    0.28    0.06
  -4   7  13    4.47    0.21
  -4  -7  13    4.76    0.20
  -4   7 -13    4.79    0.38
   4   7  13    4.60    0.20
  -5   7  13    3.68    0.19
  -5  -7  13    4.04    0.19
   5   7  13    3.64    0.18
  -5   7 -13    3.98    0.38
  -6   7  13    0.75    0.11
   6   7  13    1.01    0.12
  -6   7 -13    1.08    0.22
  -6  -7  13    1.03    0.11
  -7   7  13    1.19    0.13
   7   7  13    1.14    0.13
  -7  -7  13    1.28    0.13
  -7   7 -13    1.51    0.25
  -8   7  13    0.03    0.06
  -8   7 -13   -0.01    0.12
   8   7  13    0.17    0.07
  -8  -7  13    0.01    0.06
  -9   7  13    0.53    0.11
   9   7  13    0.53    0.11
  -9  -7  13    0.66    0.11
  -9   7 -13    0.53    0.18
 -10   7  13    1.95    0.18
  10   7  13    2.00    0.18
 -10  -7  13    2.14    0.20
 -10   7 -13    1.39    0.27
 -11   7  13    0.34    0.10
   0  -8  13    9.49    0.31
   0   8  13    9.39    0.32
  -1   8  13    2.79    0.17
   1  -8  13    2.36    0.14
  -1  -8  13    2.86    0.16
   1   8  13    2.51    0.14
   1   8  13    2.63    0.16
  -2   8  13    1.06    0.12
   2   8  13    1.30    0.12
  -2  -8  13    1.49    0.11
   2   8  13    1.30    0.12
  -2   8 -13    1.46    0.26
  -3   8  13    0.83    0.11
   3   8  13    0.54    0.08
  -3   8 -13    0.53    0.18
  -3  -8  13    0.83    0.10
   3   8  13    0.65    0.10
  -4   8  13   -0.11    0.04
  -4   8 -13   -0.13    0.14
  -4  -8  13   -0.02    0.04
   4   8  13    0.06    0.05
  -5   8  13    4.33    0.22
  -5  -8  13    4.29    0.20
  -5   8 -13    4.84    0.38
   5   8  13    4.47    0.21
  -6   8  13    0.74    0.11
  -6   8 -13    0.53    0.20
  -6  -8  13    0.60    0.10
   6   8  13    0.55    0.09
  -7   8  13    0.09    0.07
  -7  -8  13    0.04    0.05
  -7   8 -13    0.15    0.16
   7   8  13    0.13    0.07
  -8   8  13   -0.09    0.06
   8   8  13    0.04    0.06
  -8  -8  13    0.04    0.06
  -8   8 -13    0.06    0.14
  -9   8  13    0.11    0.07
  -9   8 -13    0.20    0.17
  -9  -8  13    0.06    0.07
   9   8  13    0.09    0.07
 -10   8  13    1.29    0.15
 -10   8 -13    1.05    0.25
  10   8  13    1.21    0.15
 -10  -8  13    1.20    0.16
 -11   8  13   -0.01    0.07
   0  -9  13   -0.02    0.04
   0   9  13   -0.08    0.05
   1  -9  13    0.03    0.05
  -1   9  13    0.00    0.06
   1   9  13   -0.02    0.04
  -1  -9  13    0.06    0.05
   1   9  13   -0.04    0.05
  -2   9  13    0.23    0.08
  -2   9 -13    0.01    0.13
   2   9  13   -0.06    0.04
   2   9  13    0.09    0.06
  -2  -9  13    0.04    0.05
  -3   9  13    0.04    0.06
  -3  -9  13    0.11    0.05
   3   9  13    0.02    0.06
   3   9  13    0.10    0.06
  -3   9 -13    0.06    0.16
  -4   9  13   -0.08    0.05
   4   9  13   -0.02    0.05
  -4  -9  13    0.01    0.05
  -4   9 -13   -0.19    0.13
  -5   9  13    1.70    0.17
  -5   9 -13    1.81    0.31
  -5  -9  13    1.77    0.16
   5   9  13    1.37    0.13
  -6   9  13    0.32    0.09
   6   9  13    0.60    0.10
  -6   9 -13    0.33    0.17
  -6  -9  13    0.41    0.09
  -7   9  13    0.73    0.12
   7   9  13    0.79    0.12
  -7   9 -13    0.81    0.24
  -7  -9  13    0.81    0.12
  -8   9  13   -0.06    0.07
  -8  -9  13   -0.03    0.06
  -8   9 -13    0.11    0.17
   8   9  13    0.13    0.08
  -9   9  13    2.81    0.21
  -9   9 -13    3.23    0.41
   9   9  13    3.72    0.22
  -9  -9  13    3.57    0.23
 -10   9  13    0.16    0.10
   0  10  13    2.89    0.16
   0 -10  13    3.30    0.18
   0  10  13    3.01    0.20
   1 -10  13    0.88    0.10
  -1  10  13    0.66    0.12
   1  10  13    0.77    0.10
   1  10  13    0.65    0.12
  -1 -10  13    0.77    0.10
  -2  10  13    0.00    0.06
   2  10  13    0.01    0.07
   2  10  13   -0.02    0.05
  -2 -10  13    0.08    0.06
  -3  10  13    3.71    0.22
   3  10  13    3.57    0.19
  -3  10 -13    3.38    0.39
   3  10  13    3.78    0.21
  -3 -10  13    3.57    0.19
  -4  10  13    2.19    0.19
  -4 -10  13    2.15    0.15
  -4  10 -13    2.38    0.34
   4  10  13    2.40    0.16
  -5  10  13    0.16    0.09
   5  10  13    0.07    0.06
  -5  10 -13    0.12    0.16
  -5 -10  13    0.12    0.06
  -6  10  13    4.94    0.27
  -6 -10  13    5.05    0.24
  -6  10 -13    6.53    0.48
   6  10  13    4.87    0.24
  -7  10  13    0.33    0.11
  -7 -10  13    0.27    0.09
  -7  10 -13    0.56    0.22
   7  10  13    0.23    0.09
  -8  10  13    1.63    0.19
  -8  10 -13    2.16    0.37
  -8 -10  13    1.81    0.18
   8  10  13    2.13    0.18
   0 -11  13    0.02    0.05
   0  11  13    0.01    0.08
  -1  11  13    0.49    0.11
   1 -11  13    0.55    0.09
  -1 -11  13    0.40    0.09
   1  11  13    0.47    0.11
   1  11  13    0.40    0.07
  -2  11  13    1.53    0.17
   2 -11  13    1.37    0.14
  -2 -11  13    1.97    0.17
   2  11  13    1.22    0.15
   2  11  13    1.70    0.14
  -3  11  13    0.95    0.14
   3  11  13    0.71    0.10
   3  11  13    0.83    0.13
  -3  11 -13    0.85    0.26
  -3 -11  13    0.82    0.11
  -4  11  13    0.49    0.11
   4  11  13    0.45    0.09
  -4 -11  13    0.40    0.09
  -4  11 -13    0.34    0.22
  -5  11  13    0.43    0.11
  -5 -11  13    0.27    0.08
   5  11  13    0.34    0.09
  -5  11 -13    0.16    0.18
  -6  11  13    2.32    0.22
  -6 -11  13    2.62    0.19
  -6  11 -13    2.73    0.39
   6  11  13    2.67    0.18
  -7  11  13    5.86    0.43
   7  11  13    6.25    0.28
   0  12  13    0.49    0.11
   0 -12  13    0.96    0.12
   1 -12  13    4.01    0.21
  -1  12  13    3.78    0.25
   1  12  13    3.77    0.24
  -1 -12  13    3.87    0.21
  -2  12  13    2.07    0.20
   2 -12  13    2.54    0.17
  -2 -12  13    2.15    0.16
   2  12  13    2.66    0.20
   3 -12  13    0.70    0.11
  -3  12  13    0.55    0.13
  -3 -12  13    0.75    0.12
  -4  12  13    1.24    0.17
  -4 -12  13    1.55    0.16
  -4  12 -13    1.39    0.31
  -5 -12  13    0.66    0.13
   5  12  13    0.38    0.09
  -5  12 -13    0.72    0.31
   6  12  13    0.58    0.11
   0  13  13   -0.12    0.08
   0 -13  13    0.03    0.07
  -1  13  13   -0.06    0.09
   1 -13  13   -0.03    0.07
  -1 -13  13    0.09    0.07
   1  13  13   -0.08    0.08
  -2  13  13    3.47    0.39
   2  13  13    3.39    0.25
   0   0  14   15.44    0.41
   0   0  14   14.38    0.36
  -1   0 -14    9.69    0.38
  -1   0  14   10.17    0.31
  -1   0  14   10.07    0.26
   1   0  14    9.69    0.30
  -2   0 -14   17.93    0.57
  -2   0  14   18.08    0.43
   2   0  14   18.23    0.46
  -2   0  14   17.71    0.49
  -3   0 -14    5.26    0.28
   3   0  14    4.65    0.17
   3   0  14    4.80    0.18
  -3   0  14    5.07    0.21
  -3   0  14    4.69    0.16
   4   0  14    1.38    0.10
  -4   0 -14    0.94    0.14
  -4   0  14    1.00    0.11
  -4   0  14    1.27    0.08
  -5   0  14   11.48    0.37
  -5   0 -14   11.25    0.44
   5   0  14   11.75    0.34
  -5   0  14   11.84    0.33
   6   0  14    4.68    0.19
  -6   0  14    4.76    0.22
  -6   0  14    4.50    0.18
  -6   0 -14    4.49    0.27
  -7   0  14   18.74    0.50
   7   0  14   19.10    0.50
  -7   0  14   19.32    0.55
  -7   0 -14   18.23    0.62
  -8   0 -14   17.22    0.60
  -8   0  14   17.64    0.52
  -8   0  14   16.92    0.48
   8   0  14   17.12    0.48
   9   0  14    4.26    0.20
  -9   0  14    4.14    0.20
  -9   0 -14    4.31    0.29
  -9   0  14    3.98    0.21
 -10   0 -14    1.11    0.18
 -10   0  14    1.00    0.13
  10   0  14    1.10    0.12
 -10   0  14    1.21    0.15
 -11   0 -14    1.31    0.20
 -11   0  14    1.44    0.15
  11   0  14    1.08    0.12
  12   0  14    0.97    0.13
 -12   0  14    1.22    0.14
 -12   0 -14    0.92    0.19
  13   0  14    0.72    0.12
 -13   0 -14    0.55    0.17
   0  -1  14    0.01    0.02
   0   1  14   -0.04    0.04
  -1   1  14    0.86    0.09
  -1  -1  14    1.20    0.07
   1   1  14    1.11    0.08
  -1   1 -14    1.25    0.18
  -2   1  14    6.66    0.24
   2   1  14    6.59    0.22
  -2  -1  14    6.69    0.20
  -2   1 -14    6.35    0.32
   3  -1  14    7.05    0.22
  -3  -1 -14    6.91    0.31
  -3   1  14    6.83    0.25
   3   1  14    6.78    0.22
  -3   1 -14    7.75    0.35
   3   1  14    7.13    0.23
  -3  -1  14    6.85    0.21
  -4  -1 -14   -0.07    0.07
  -4   1  14    0.09    0.05
   4  -1  14    0.01    0.04
  -4   1 -14    0.03    0.09
   4   1  14   -0.02    0.04
  -4  -1  14    0.05    0.04
  -5   1  14    3.43    0.18
  -5  -1 -14    3.34    0.22
   5  -1  14    3.47    0.15
   5   1  14    3.63    0.16
  -5  -1  14    3.50    0.15
  -5   1 -14    2.99    0.23
  -5  -1  14    3.17    0.17
  -6  -1 -14   -0.04    0.07
  -6   1  14    0.04    0.05
   6  -1  14    0.05    0.04
  -6  -1  14    0.11    0.05
  -6   1 -14    0.06    0.09
   6   1  14    0.12    0.05
  -6  -1  14    0.08    0.06
  -7   1  14   10.88    0.37
  -7  -1 -14   11.10    0.43
   7  -1  14   11.40    0.33
  -7  -1  14   10.91    0.37
  -7   1 -14   10.10    0.45
  -7  -1  14   11.13    0.34
   7   1  14   11.40    0.34
   8  -1  14   35.44    0.85
  -8  -1 -14   36.10    0.98
  -8   1  14   34.99    0.89
   8   1  14   34.99    0.86
  -8  -1  14   35.26    0.86
  -8   1 -14   35.98    1.03
  -8  -1  14   35.73    0.90
  -9   1  14   20.31    0.59
  -9  -1 -14   21.71    0.69
   9  -1  14   20.15    0.55
   9   1  14   21.23    0.57
  -9   1 -14   21.19    0.71
  -9  -1  14   20.49    0.60
  -9  -1  14   20.44    0.57
 -10   1  14    0.17    0.08
 -10  -1 -14    0.12    0.10
  10  -1  14    0.10    0.06
  10   1  14    0.06    0.07
 -10  -1  14    0.08    0.06
 -10   1 -14    0.11    0.11
  11  -1  14    1.44    0.14
 -11  -1 -14    1.01    0.18
 -11   1  14    1.44    0.15
 -11  -1  14    1.36    0.15
 -11   1 -14    1.49    0.23
 -11  -1  14    1.30    0.14
  11   1  14    1.57    0.15
 -12   1  14    0.32    0.09
 -12  -1 -14    0.29    0.14
  12   1  14    0.27    0.09
 -12  -1  14    0.35    0.10
 -12  -1  14    0.29    0.10
 -12   1 -14    0.21    0.14
 -13  -1 -14    2.13    0.26
 -13  -1  14    2.44    0.22
 -13   1 -14    2.59    0.31
  13   1  14    2.42    0.18
   0   2  14    6.58    0.23
   0  -2  14    6.48    0.20
  -1   2  14    0.44    0.07
  -1  -2  14    0.59    0.06
   1   2  14    0.48    0.07
  -1   2 -14    0.41    0.13
  -2   2  14    0.34    0.07
  -2   2 -14    0.52    0.14
  -2  -2  14    0.43    0.06
   2   2  14    0.31    0.06
  -3   2  14    0.42    0.07
   3  -2  14    0.27    0.05
   3   2  14    0.28    0.06
  -3  -2  14    0.27    0.05
   3   2  14    0.48    0.06
  -3   2 -14    0.45    0.13
  -4   2  14    0.03    0.04
   4  -2  14    0.10    0.04
  -4  -2  14    0.07    0.04
  -4   2 -14   -0.04    0.09
   4   2  14    0.10    0.04
  -5   2  14    0.03    0.05
   5  -2  14    0.08    0.04
   5   2  14   -0.07    0.04
  -5  -2  14    0.02    0.04
  -5   2 -14    0.08    0.10
   6  -2  14   -0.01    0.04
  -6   2  14    0.01    0.05
  -6   2 -14   -0.08    0.08
  -6  -2  14   -0.03    0.04
   6   2  14    0.07    0.04
  -7   2  14    1.05    0.12
   7  -2  14    1.21    0.10
  -7  -2  14    1.32    0.12
  -7   2 -14    1.17    0.19
   7   2  14    1.24    0.11
  -8   2  14    7.02    0.28
   8  -2  14    7.17    0.25
  -8   2 -14    7.19    0.39
  -8  -2  14    6.96    0.29
  -8  -2  14    7.12    0.27
   8   2  14    6.91    0.26
  -9   2  14   16.74    0.51
   9  -2  14   17.06    0.47
  -9   2 -14   18.02    0.66
  -9  -2  14   16.59    0.52
  -9  -2  14   17.03    0.50
   9   2  14   17.12    0.49
 -10   2  14    1.08    0.13
  10   2  14    1.11    0.13
 -10  -2  14    1.13    0.14
 -10   2 -14    0.91    0.19
 -10  -2  14    0.90    0.12
 -11   2  14    0.04    0.06
 -11   2 -14    0.04    0.11
  11   2  14    0.04    0.07
 -11  -2  14    0.08    0.07
 -11  -2  14    0.05    0.06
 -12   2  14    2.50    0.17
 -12  -2  14    2.51    0.19
 -12   2 -14    2.65    0.31
  12   2  14    2.08    0.18
 -13  -2  14    0.13    0.09
   0  -3  14   -0.03    0.03
   0   3  14    0.00    0.03
  -1   3  14    0.17    0.05
   1   3  14    0.18    0.05
  -1  -3  14    0.15    0.04
  -1   3 -14    0.24    0.13
  -2   3  14    0.67    0.09
  -2  -3  14    0.65    0.07
   2   3  14    0.75    0.08
  -2   3 -14    0.67    0.15
   3  -3  14    7.63    0.23
  -3   3  14    7.39    0.27
  -3  -3  14    7.56    0.24
   3   3  14    7.18    0.25
   3   3  14    7.95    0.24
  -3   3 -14    7.67    0.39
  -4   3  14    2.12    0.13
   4  -3  14    2.02    0.10
  -4  -3  14    1.98    0.11
  -4   3 -14    2.33    0.26
   4   3  14    1.85    0.12
  -5   3  14   11.95    0.38
   5  -3  14   11.72    0.32
  -5  -3  14   12.41    0.35
  -5   3 -14   12.21    0.51
   5   3  14   11.82    0.35
   6  -3  14    6.14    0.21
  -6   3  14    6.50    0.26
  -6   3 -14    5.89    0.36
  -6  -3  14    6.79    0.24
   6   3  14    6.14    0.23
  -7   3  14    1.82    0.14
  -7   3 -14    1.79    0.24
   7   3  14    2.19    0.14
  -7  -3  14    1.87    0.13
  -8   3  14    0.64    0.10
  -8   3 -14    0.67    0.17
  -8  -3  14    0.63    0.09
   8   3  14    0.76    0.11
  -9   3  14    2.99    0.18
   9   3  14    3.34    0.18
  -9  -3  14    3.00    0.19
  -9   3 -14    2.25    0.27
  -9  -3  14    3.38    0.19
 -10   3  14    3.50    0.20
  10   3  14    2.77    0.18
 -10  -3  14    2.85    0.18
 -10  -3  14    2.97    0.19
 -10   3 -14    3.08    0.32
 -11   3  14    0.28    0.09
 -11  -3  14    0.28    0.09
  11   3  14    0.26    0.09
 -11  -3  14    0.31    0.09
 -11   3 -14    0.08    0.13
 -12   3  14    0.41    0.10
 -12   3 -14    0.36    0.18
  12   3  14    0.16    0.09
 -12  -3  14    0.31    0.10
   0  -4  14    0.42    0.06
   0   4  14    0.27    0.06
  -1   4  14    0.44    0.07
   1   4  14    0.44    0.06
  -1  -4  14    0.58    0.07
  -1   4 -14    0.34    0.13
  -2   4  14    7.39    0.26
  -2  -4  14    7.29    0.24
  -2   4 -14    7.25    0.40
   2   4  14    7.48    0.24
  -3   4  14    2.73    0.15
  -3   4 -14    2.56    0.28
  -3  -4  14    2.34    0.13
   3   4  14    2.63    0.14
   3   4  14    2.48    0.12
  -4   4  14    0.12    0.05
  -4  -4  14    0.09    0.04
   4   4  14    0.11    0.05
  -4   4 -14    0.00    0.10
  -5   4  14    0.26    0.07
  -5  -4  14    0.43    0.07
   5   4  14    0.40    0.07
  -5   4 -14    0.75    0.17
  -6   4  14    0.69    0.10
  -6   4 -14    0.92    0.19
  -6  -4  14    0.84    0.10
   6   4  14    0.56    0.09
  -7   4  14   -0.06    0.05
  -7  -4  14    0.05    0.05
  -7   4 -14    0.02    0.09
   7   4  14    0.07    0.05
  -8   4  14    0.56    0.10
   8   4  14    0.73    0.11
  -8  -4  14    0.57    0.09
  -8   4 -14    0.42    0.15
  -9   4  14    0.14    0.07
  -9  -4  14    0.28    0.08
  -9   4 -14    0.21    0.15
   9   4  14    0.34    0.08
 -10   4  14    0.63    0.11
  10   4  14    0.65    0.11
 -10   4 -14    0.80    0.19
 -10  -4  14    0.44    0.10
 -11   4  14    2.32    0.17
 -11   4 -14    2.77    0.33
  11   4  14    2.29    0.20
 -11  -4  14    2.09    0.19
 -11  -4  14    1.76    0.17
 -12   4  14    0.02    0.06
 -12   4 -14    0.14    0.16
  12   4  14   -0.06    0.11
 -12  -4  14   -0.10    0.06
   0  -5  14    0.01    0.04
   0   5  14   -0.01    0.05
  -1   5  14    1.58    0.12
   1   5  14    1.70    0.11
  -1  -5  14    1.78    0.11
  -1   5 -14    1.77    0.23
  -2   5  14    0.97    0.10
  -2  -5  14    0.93    0.09
  -2   5 -14    1.08    0.21
   2   5  14    0.94    0.09
  -3   5  14    4.82    0.21
   3   5  14    4.81    0.18
  -3  -5  14    4.52    0.19
   3   5  14    4.78    0.20
  -3   5 -14    5.23    0.35
  -4   5  14    1.12    0.12
  -4  -5  14    1.07    0.10
   4   5  14    1.24    0.12
  -4   5 -14    1.24    0.22
  -5   5  14    8.48    0.31
  -5  -5  14    8.99    0.30
   5   5  14    8.65    0.30
  -5   5 -14   10.19    0.49
  -6   5  14    8.25    0.30
  -6  -5  14    8.06    0.29
  -6   5 -14    7.48    0.43
   6   5  14    7.82    0.28
  -7   5  14    0.29    0.08
  -7   5 -14    0.33    0.16
   7   5  14    0.24    0.07
  -7  -5  14    0.28    0.07
  -8   5  14    1.58    0.15
   8   5  14    1.64    0.15
  -8  -5  14    1.89    0.15
  -8   5 -14    1.96    0.27
  -9   5  14    2.77    0.18
  -9  -5  14    2.93    0.19
  -9   5 -14    2.55    0.31
   9   5  14    3.17    0.18
 -10   5  14    1.32    0.15
  10   5  14    1.41    0.15
 -10  -5  14    1.56    0.16
 -10   5 -14    1.75    0.28
 -11   5  14    1.94    0.17
 -11   5 -14    1.71    0.27
 -11  -5  14    1.83    0.18
  11   5  14    2.02    0.19
 -12   5  14    0.34    0.10
   0   6  14  173.57    3.74
   0  -6  14  180.19    3.73
  -1   6  14   77.63    1.70
  -1  -6  14   75.67    1.68
   1   6  14   75.92    1.68
  -2   6  14    2.87    0.16
  -2   6 -14    3.15    0.33
   2   6  14    3.11    0.16
   2   6  14    3.57    0.17
  -2  -6  14    3.09    0.16
  -3   6  14    1.01    0.11
  -3   6 -14    1.27    0.23
   3   6  14    1.04    0.10
   3   6  14    1.11    0.10
  -3  -6  14    0.95    0.10
  -4   6  14    0.00    0.05
  -4   6 -14    0.07    0.12
  -4  -6  14    0.06    0.05
   4   6  14    0.04    0.05
  -5   6  14    7.25    0.29
   5   6  14    8.12    0.28
  -5   6 -14    7.85    0.45
  -5  -6  14    7.05    0.27
  -6   6  14   17.50    0.51
   6   6  14   17.61    0.49
  -6  -6  14   17.03    0.49
  -6   6 -14   16.15    0.69
  -7   6  14    3.53    0.19
   7   6  14    3.61    0.19
  -7   6 -14    3.62    0.36
  -7  -6  14    2.91    0.18
  -8   6  14    0.08    0.07
  -8  -6  14    0.01    0.06
   8   6  14   -0.05    0.06
  -8   6 -14    0.15    0.14
  -9   6  14    0.09    0.07
   9   6  14    0.11    0.07
  -9   6 -14    0.13    0.16
  -9  -6  14    0.05    0.06
 -10   6  14    0.00    0.06
 -10   6 -14   -0.12    0.11
 -10  -6  14   -0.08    0.05
  10   6  14   -0.04    0.06
 -11   6  14    0.14    0.08
 -11   6 -14   -0.04    0.17
 -11  -6  14    0.07    0.07
  11   6  14    0.04    0.12
 -12   6  14    0.38    0.10
   0  -7  14    0.32    0.07
  -1   7  14    2.45    0.15
   1   7  14    2.69    0.15
  -1  -7  14    2.56    0.14
  -2   7  14   -0.03    0.05
   2   7  14    0.07    0.06
   2   7  14    0.00    0.05
  -2   7 -14    0.10    0.14
  -2  -7  14    0.01    0.04
  -3   7  14    0.25    0.07
  -3  -7  14    0.25    0.07
   3   7  14    0.47    0.08
  -3   7 -14    0.47    0.17
   3   7  14    0.39    0.08
  -4   7  14    0.00    0.05
  -4  -7  14    0.00    0.05
   4   7  14   -0.04    0.05
  -4   7 -14   -0.16    0.11
  -5   7  14    0.03    0.06
  -5   7 -14    0.23    0.15
   5   7  14    0.12    0.06
  -5  -7  14    0.11    0.06
  -6   7  14    6.26    0.27
  -6  -7  14    6.30    0.26
  -6   7 -14    6.59    0.45
   6   7  14    6.19    0.26
  -7   7  14    1.64    0.16
   7   7  14    1.50    0.15
  -7   7 -14    1.78    0.29
  -7  -7  14    1.27    0.14
  -8   7  14    0.41    0.10
  -8  -7  14    0.43    0.10
   8   7  14    0.45    0.10
  -8   7 -14    0.40    0.19
  -9   7  14    3.46    0.21
   9   7  14    3.43    0.20
  -9   7 -14    3.58    0.40
  -9  -7  14    4.03    0.23
 -10   7  14    1.73    0.17
  10   7  14    1.90    0.18
 -10  -7  14    2.22    0.18
 -10   7 -14    1.98    0.31
 -11   7  14    3.98    0.23
   0  -8  14    0.20    0.06
   0   8  14    0.11    0.06
  -1   8  14    0.51    0.09
   1  -8  14    0.61    0.08
   1   8  14    0.66    0.10
  -1  -8  14    0.73    0.10
   1   8  14    0.63    0.09
  -2   8  14    0.53    0.09
  -2  -8  14    0.63    0.09
   2   8  14    0.72    0.10
   2   8  14    0.63    0.09
  -2   8 -14    0.51    0.19
  -3   8  14    0.34    0.09
  -3   8 -14    0.61    0.21
   3   8  14    0.61    0.09
  -3  -8  14    0.46    0.08
   3   8  14    0.56    0.09
  -4   8  14    0.38    0.09
  -4   8 -14    0.30    0.18
   4   8  14    0.18    0.07
  -4  -8  14    0.25    0.07
  -5   8  14    3.81    0.20
  -5   8 -14    3.40    0.37
   5   8  14    3.88    0.20
  -5  -8  14    3.55    0.19
  -6   8  14    1.54    0.16
  -6   8 -14    1.47    0.28
   6   8  14    1.36    0.13
  -6  -8  14    1.51    0.15
  -7   8  14    0.21    0.09
   7   8  14    0.24    0.08
  -7   8 -14    0.24    0.17
  -7  -8  14    0.28    0.08
  -8   8  14    0.23    0.08
  -8  -8  14    0.24    0.08
  -8   8 -14   -0.04    0.14
   8   8  14    0.16    0.07
  -9   8  14    1.25    0.15
  -9   8 -14    1.21    0.26
   9   8  14    1.37    0.16
  -9  -8  14    1.23    0.15
 -10   8  14    0.84    0.13
   0   9  14   -0.03    0.06
   0  -9  14    0.01    0.05
   1  -9  14    0.57    0.09
  -1   9  14    0.61    0.10
   1   9  14    0.59    0.10
  -1  -9  14    0.61    0.09
   1   9  14    0.62    0.09
  -2   9  14    0.50    0.10
   2   9  14    0.44    0.09
   2   9  14    0.54    0.09
  -2  -9  14    0.41    0.08
  -3   9  14    0.98    0.13
   3   9  14    1.02    0.13
  -3   9 -14    1.15    0.26
   3   9  14    0.97    0.11
  -3  -9  14    1.13    0.12
  -4   9  14    2.23    0.16
  -4  -9  14    1.83    0.15
   4   9  14    1.85    0.14
  -4   9 -14    1.34    0.27
  -5   9  14   -0.07    0.06
  -5  -9  14    0.09    0.06
   5   9  14    0.08    0.06
  -5   9 -14   -0.25    0.11
  -6   9  14    1.31    0.15
   6   9  14    1.68    0.16
  -6  -9  14    1.46    0.15
  -6   9 -14    1.34    0.27
  -7   9  14    0.45    0.11
   7   9  14    0.58    0.11
  -7  -9  14    0.32    0.09
  -7   9 -14    0.63    0.24
  -8   9  14   -0.01    0.08
  -8   9 -14    0.43    0.22
   8   9  14    0.36    0.10
  -8  -9  14    0.31    0.09
  -9   9  14    3.19    0.23
   0  10  14    3.52    0.18
   0  10  14    3.28    0.20
   0 -10  14    3.44    0.19
  -1  10  14    0.12    0.07
   1 -10  14    0.39    0.08
  -1 -10  14    0.08    0.06
   1  10  14    0.13    0.08
   1  10  14    0.15    0.07
  -2  10  14    1.05    0.13
   2 -10  14    1.24    0.13
   2  10  14    0.96    0.11
   2  10  14    0.80    0.13
  -2 -10  14    0.92    0.11
  -3  10  14    2.85    0.20
  -3 -10  14    2.38    0.16
  -3  10 -14    2.30    0.34
   3  10  14    2.80    0.16
  -4  10  14    1.96    0.19
  -4  10 -14    1.72    0.31
  -4 -10  14    2.26    0.16
   4  10  14    2.19    0.16
  -5  10  14    0.46    0.12
   5  10  14    0.33    0.09
  -5 -10  14    0.37    0.09
  -5  10 -14    0.27    0.20
  -6  10  14    2.29    0.21
   6  10  14    2.24    0.17
  -6 -10  14    2.52    0.17
  -6  10 -14    1.94    0.33
  -7  10  14    0.07    0.09
   7  10  14    0.11    0.08
  -7 -10  14    0.11    0.09
  -7  10 -14    0.13    0.18
   8  10  14    0.06    0.08
   0  11  14   -0.10    0.07
   0 -11  14    0.05    0.06
   0  11  14   -0.07    0.04
   1 -11  14    0.28    0.08
  -1  11  14    0.45    0.11
   1  11  14    0.29    0.09
  -1 -11  14    0.30    0.09
   1  11  14    0.43    0.08
   2 -11  14    0.03    0.06
  -2  11  14    0.05    0.07
   2  11  14    0.01    0.08
   2  11  14    0.03    0.06
  -2 -11  14    0.11    0.06
  -3  11  14    1.71    0.18
   3  11  14    1.33    0.13
  -3 -11  14    2.04    0.16
  -4  11  14    1.46    0.17
  -4 -11  14    1.63    0.16
   4  11  14    1.77    0.16
  -4  11 -14    2.23    0.36
  -5  11  14    0.09    0.09
   5  11  14    0.06    0.06
  -5  11 -14   -0.13    0.18
  -5 -11  14    0.10    0.07
  -6  11  14    3.77    0.28
   6  11  14    2.97    0.20
  -6 -11  14    2.70    0.25
  -6  11 -14    3.42    0.51
   7  11  14    5.29    0.27
   0  12  14    0.53    0.12
   0 -12  14    0.90    0.13
  -1  12  14    0.30    0.10
   1 -12  14    0.21    0.08
  -1 -12  14    0.30    0.09
   1  12  14    0.20    0.10
   2 -12  14    0.55    0.11
  -2  12  14    0.66    0.13
  -2 -12  14    0.61    0.11
   2  12  14    0.84    0.14
   3 -12  14    1.25    0.14
  -3  12  14    1.63    0.19
  -3 -12  14    1.58    0.16
   4  12  14    0.31    0.09
   5  12  14   -0.10    0.06
   6  12  14   12.20    0.43
   0  13  14    0.08    0.09
   1  13  14    2.02    0.21
   2  13  14    0.34    0.12
   0   0  15    0.33    0.04
  -1   0  15    0.03    0.05
   1   0  15   -0.02    0.04
  -1   0  15    0.00    0.02
  -1   0 -15    0.00    0.08
  -2   0 -15    0.05    0.08
   2   0  15   -0.01    0.03
  -2   0  15    0.10    0.05
  -2   0  15    0.02    0.03
   3   0  15    0.00    0.04
  -3   0  15    0.01    0.03
  -3   0  15   -0.05    0.04
  -3   0 -15    0.12    0.10
   3   0  15   -0.01    0.03
  -4   0  15    0.03    0.05
   4   0  15   -0.02    0.04
  -4   0 -15    0.04    0.10
  -5   0  15   -0.01    0.05
  -5   0 -15    0.01    0.08
   5   0  15    0.06    0.05
   6   0  15    0.03    0.05
  -6   0  15    0.07    0.06
  -6   0 -15   -0.17    0.07
   7   0  15   -0.02    0.05
  -7   0 -15   -0.06    0.08
  -7   0  15   -0.03    0.06
  -8   0  15    0.03    0.06
   8   0  15    0.05    0.05
  -8   0 -15    0.04    0.10
  -9   0  15   -0.07    0.06
  -9   0 -15    0.02    0.10
   9   0  15   -0.01    0.05
 -10   0  15    0.03    0.06
 -10   0 -15   -0.13    0.10
  10   0  15    0.09    0.07
  11   0  15   -0.17    0.05
 -11   0  15   -0.04    0.06
 -11   0 -15    0.01    0.11
  12   0  15    0.05    0.06
 -12   0 -15    0.09    0.12
 -12   0  15   -0.03    0.06
 -13   0 -15    0.14    0.15
  13   0  15    0.04    0.08
[truncated: 82,207 more chars]
